# Supplementary material for: Trisomy 21 induces pericentrosomal crowding delaying primary ciliogenesis and mouse cerebellar development
Source: PubMed Central journal article supplement (PMC9851619; doi:10.7554/elife.78202), 2023-01-19

# Figure 3-source data 2

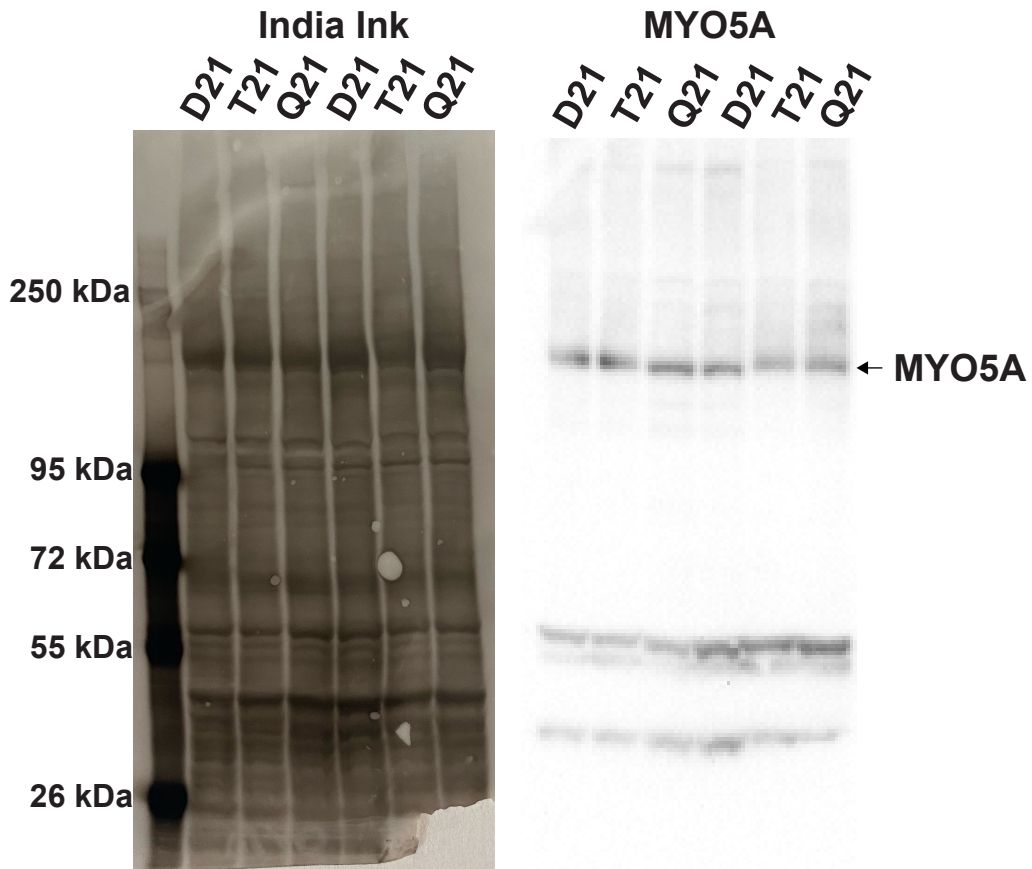

Supplement: elife-78202-fig3-figsupp1-data1.pdf [file elife-78202-fig3-figsupp1-data1.pdf]
