# Supplementary material for: Trisomy 21 induces pericentrosomal crowding delaying primary ciliogenesis and mouse cerebellar development
Source: PubMed Central journal article supplement (PMC9851619; doi:10.7554/elife.78202), 2023-01-19

# Figure 6-source data 2

**Gli1**

**Pcna**

WT 1-1 c1  
WT 1-1 c1  
WT 1-1 c2  
WT 1-1 c2  
Dp10 1-3 SAG1  
Dp10 1-3 SAG2  
Dp10 1-3 c1  
Dp10 1-3 c2  
Dp10 1-3 SAG1  
Dp10 1-3 SAG2

WT 1-1 c1  
WT 1-1 c1  
WT 1-1 c2  
WT 1-1 c2  
Dp10 1-3 SAG1  
Dp10 1-3 SAG2  
Dp10 1-3 c1  
Dp10 1-3 c2  
Dp10 1-3 SAG1  
Dp10 1-3 SAG2

3 kbp  
1 kbp  
0.5 kbp

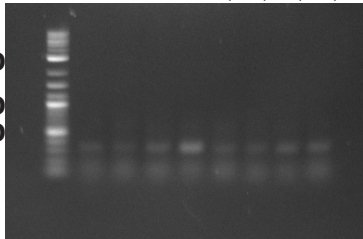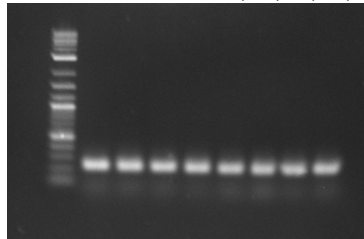

Supplement: elife-78202-fig6-figsupp1-data1.pdf [file elife-78202-fig6-figsupp1-data1.pdf]
