# Supplementary material for: Trisomy 21 induces pericentrosomal crowding delaying primary ciliogenesis and mouse cerebellar development
Source: eLife. 2023 Jan 19;12:e78202. doi: 10.7554/eLife.78202 (PMC9851619; doi:10.7554/eLife.78202)
Supplement: Figure 1—source data 1. [file elife-78202-fig1-data1.xlsx]

## Sheet: Figure 1-source data C
D21							T21							Q21
0	2	4	8	24	48		0	2	4	8	24	48		0	2	4	8	24	48
799.122	1011.08	1005.27	1078.17	2117.33	2677.52		1309.58	1592.64	3122.96	1497	3148.56	2449.24		1264.92	2258.25	3965.89	2329.27	4281.97	2925.63
759.012	934.082	943.349	1029.27	1991.09	2552.17		1233.32	1485.12	2967.16	1411.15	2992.59	2329.89		1201.87	2143.73	3793.21	2229.63	4125.99	2851.07
699.705	835.894	865.114	956.651	1821.07	2377.76		1132.02	1358.73	2755.2	1301.43	2765.74	2171.65		1116.34	2007.72	3542.05	2100.78	3898.59	2729.65
612.629	703.922	742.834	842.106	1565.36	2083.6		977.761	1164.68	2403.08	1123.36	2385.4	1931.67		986.547	1796.26	3148.31	1879.96	3541.65	2488.12
534.326	594.177	630.609	731.625	1339.01	1792.07		836.937	987.601	2073.76	959.694	2014.27	1709.84		870.02	1595.64	2774.97	1660.52	3187.08	2236.66
462.947	498.928	527.429	631.143	1142.73	1513.71		713.39	832.683	1779.81	815.097	1680.16	1505.37		759.119	1392.89	2442.44	1443.67	2839.71	1978.53
387.058	404.731	422.715	519.909	936.324	1206.3		579.725	674.184	1455.18	658.645	1333.45	1286.29		635.906	1166.79	2067.76	1199.74	2429.93	1680.73
316.758	323.384	325.73	418.609	749.746	934.509		463.392	535.717	1166.84	522.31	1039.36	1078.4		517.858	946.132	1705.91	967.264	2031.42	1391.47
257.383	260.965	249.915	335.514	594.699	720.081		369.677	424.471	931.854	410.627	809.636	898.691		417.739	757.56	1384.83	772.266	1659.68	1128.55
216.36	217.981	204.102	278.037	489.382	586.779		307.675	353.323	771.541	336.786	665.366	772.178		349.714	627.521	1157.63	640.762	1390	942.579
186.407	186.878	173.854	240.55	412.561	495.791		262.401	302.917	659.397	284.619	567.793	678.889		300.29	534.869	994.674	544.835	1199.71	803.122
161.003	161.388	147.936	205.191	346.836	420.565		225.497	259.343	565.073	241.581	484.83	595.543		257.191	455.715	855.472	460.274	1032.09	681.352
138.992	137.544	127.315	176.098	291.294	359.522		196.219	224.783	487.511	204.924	417.291	523.829		220.528	390.693	737.299	391.374	886.78	579.119
122.522	120.271	111.434	154.006	250.63	313.998		172.072	196.915	428.423	178.241	365.78	468.717		192.826	340.77	646.634	339.521	776.088	500.854
109.438	107.098	99.3639	135.797	220.329	278.667		154.646	177.244	383.409	157.197	327.229	423.622		172.339	303.168	579.621	302.15	688.117	440.737
99.0392	96.3113	89.7833	121.801	195.868	249.301		139.761	159.525	346.797	140.4	293.886	385.87		154.875	272.162	523.55	271.55	617.218	392.905
89.9693	87.0519	81.0943	109.856	174.863	224.906		126.741	145.229	314.404	126.413	266.088	351.366		139.459	245.385	475.323	245.851	557.08	351.611
82.267	79.6137	73.56	99.3017	156.838	202.683		115.543	131.783	286.136	113.81	241.486	320.424		126.696	221.217	430.813	222.843	504.513	315.401
74.8802	72.1363	66.8606	90.3471	141.427	183.306		105.999	120.771	261.835	103.541	220.586	292.592		115.255	201.859	394.691	202.588	457.938	284.565
70.1845	66.2523	61.9291	83.4321	129.638	168.19		98.5455	112.063	243.058	95.7398	203.216	270.854		105.694	185.895	364.592	187.225	423.115	262.067
65.0123	62.1013	57.3898	76.9315	118.572	154.518		91.7385	103.646	225.308	88.0727	187.831	250.577		97.6027	171.149	336.853	172.72	388.841	240.678
60.8831	58.1151	52.9544	71.4975	108.851	142.91		85.6166	96.9263	209.66	82.126	174.408	232.27		90.731	158.394	313.206	160.546	359.49	222.383
57.016	54.4623	49.8448	67.0596	100.549	132.375		80.3754	91.3997	196.047	76.6207	162.302	217.155		85.1772	147.273	292.356	149.752	335.267	207.702
53.9711	51.0888	46.3474	62.475	93.4181	122.898		75.5202	86.074	183.755	71.7203	152.622	201.578		79.897	138.236	274.064	140.134	310.494	193.01
51.1682	47.759	43.3919	58.0869	86.0936	114.19		71.371	80.4371	172.532	66.9916	142.431	189.171		75.3649	129.788	256.239	131.114	288.305	180.397
48.3666	45.6605	40.6425	54.1915	79.7297	105.768		66.8454	75.6463	162.366	62.4761	133.686	175.708		71.2454	122.425	239.268	122.898	267.423	167.892
46.4498	43.3883	38.2261	50.9363	74.2244	98.8761		63.6111	71.3405	152.82	58.6045	125.816	165.149		68.0547	115.767	225.974	116.593	249.943	159.057
44.6683	41.3169	36.5052	47.9887	69.8044	92.2265		60.9804	67.8819	144.846	55.4902	118.964	155.611		65.1495	109.686	212.838	111.202	233.798	149.995
42.5353	40.1621	34.5859	45.6617	65.6496	86.1604		58.2345	64.0915	138.07	52.4003	112.163	145.951		61.9998	104.48	201.278	105.858	218.833	141.44
41.0071	38.2778	33.2799	43.2967	61.4447	80.8828		55.2864	61.3552	131.595	49.6849	106.002	137.782		59.2981	100.067	190.748	100.736	205.207	133.867
39.2413	37.2298	31.3849	41.194	57.8061	75.3072		52.8078	58.1186	125.63	47.3049	100.287	129.241		56.643	95.3178	181.603	96.3497	192.214	126.539
37.4285	35.8472	29.9397	39.3449	54.6636	70.7876		50.4457	55.2481	120.542	45.2764	95.0809	122.198		53.9119	91.1531	173.069	92.2342	180.847	119.833
35.9607	34.5725	28.5606	37.6733	51.3875	66.4605		48.0377	52.4273	115.303	43.6451	90.68	115.759		51.5814	87.7221	165.939	89.0737	170.551	113.525
34.6821	33.3127	27.1829	35.8506	48.7464	62.8171		46.3238	50.2559	110.547	41.6532	86.4461	109.77		49.3088	84.3614	159.674	85.2785	161.279	107.666
33.1264	32.2125	25.8878	34.5333	46.526	58.9117		44.4446	48.4077	106.403	40.2279	82.8566	104.448		47.713	80.7936	153.199	82.1434	153.827	102.987
31.9735	31.2736	24.7661	32.9575	44.3213	55.5875		42.7253	46.5677	101.794	38.9851	79.6341	98.9112		46.2874	77.8663	147.485	79.3366	146.269	97.7284
31.0359	30.37	24.0341	31.1935	41.9546	52.7876		41.3541	45.2018	98.0543	37.6408	76.4673	94.1293		44.6038	74.9793	141.837	75.9286	139.505	93.0161
30.3157	29.5248	22.984	30.0725	39.8977	49.5193		39.8076	43.7237	94.1947	36.3313	72.8673	89.3146		43.0256	72.4212	136.161	72.8327	132.712	88.7465
29.3243	28.7288	22.2804	28.8125	37.9056	46.9874		38.2218	41.8312	90.5111	34.9201	69.7849	84.8177		41.5004	69.9096	131.14	70.1553	126.83	84.2772
28.6509	28.1683	21.4933	28.0844	36.0651	44.6142		36.8139	40.2457	87.7887	33.6416	67.2185	81.7878		40.1213	67.7815	127.376	67.6644	121.993	80.9175
28.1425	27.6555	20.5531	27.3539	34.7968	42.6919		35.4831	38.5483	84.182	32.593	64.3619	77.9576		39.1346	65.7625	123.467	65.4085	116.522	77.2195
27.7931	26.9709	19.978	26.612	33.1552	40.5997		34.3502	36.9098	81.6033	31.4932	61.8262	74.7124		38.0985	64.061	119.724	63.1587	111.324	73.7608
27.1825	26.6435	19.1211	25.7929	31.5404	38.3698		33.0143	35.5974	78.8972	30.4975	59.3456	71.4378		37.3232	62.0695	116.387	61.0517	106.362	70.9034
26.5705	26.1183	18.7779	25.3749	30.1366	36.3428		31.8927	34.4788	76.3884	29.4535	57.2895	68.3505		36.122	60.1769	113.099	59.5039	102.668	67.9392
26.2757	25.5805	17.9549	24.6687	28.8027	34.8114		31.2578	33.6059	73.7504	28.8294	55.1163	65.5463		34.9945	58.5138	110.019	57.7105	99.2553	65.1236
25.7319	25.421	17.5043	23.9981	27.6203	33.4615		30.349	32.6617	71.3416	28.0492	53.0463	62.8982		34.2663	56.7082	107.172	56.262	95.7114	62.5291
25.018	25.0645	17.0832	23.2077	26.4715	31.8795		29.382	31.6919	69.249	27.4967	51.1546	60.4635		33.4442	55.0706	104.499	54.8445	92.7348	60.1527
24.5548	24.7434	16.5349	22.6292	25.4245	30.7109		28.6426	30.7942	67.0606	27.1119	49.3286	57.4108		32.6994	53.4304	101.877	53.7297	89.6822	57.9155
23.8276	24.4482	16.145	21.9053	24.5391	29.3335		27.9356	29.4783	64.9132	26.4202	47.5241	55.5253		31.9236	52.0405	99.8528	52.2884	86.5863	55.7539
23.47	23.9477	15.525	21.4035	23.5947	28.0256		27.3048	28.6299	63.1424	25.7296	45.4956	53.2178		31.1489	50.683	97.2975	51.2212	83.6091	53.5308
22.8107	23.5011	15.1334	21.2426	22.6427	27.0043		26.5697	27.5971	61.508	24.8744	43.8097	51.1928		30.306	49.3963	95.169	49.5036	80.6051	51.4737
22.4685	23.0233	14.8634	20.688	21.9147	26.0277		25.9973	26.7574	60.1922	24.2805	42.4448	49.4351		29.9421	48.1732	92.8676	48.0229	78.1151	49.3398
22.1904	22.8644	14.6422	20.2554	21.0358	25.0726		25.3305	26.2207	58.5774	23.5275	40.8744	47.7108		29.1521	47.0695	90.3229	46.7157	75.8128	47.6556
21.8389	22.3722	14.2526	19.9924	20.4181	24.0097		24.8178	25.5331	56.9998	22.991	39.7298	46.0732		28.6454	46.0876	87.6659	44.9838	73.7636	45.9841
21.5204	22.0767	13.8173	19.7037	19.5551	23.4231		24.3566	24.9984	55.3337	22.5598	38.2794	44.4413		28.3328	45.069	85.3253	44.0305	71.8635	44.137
21.3178	21.6124	13.4433	19.3427	19.0533	22.529		23.7757	23.9095	53.8874	21.9757	36.8341	42.7307		27.9616	44.157	83.674	42.9307	70.4868	42.6779
21.0656	21.2563	13.1907	19.0865	18.6413	21.7181		23.4039	23.1689	52.8389	21.6879	35.9474	41.2585		27.2553	43.2512	81.9764	41.8761	68.7032	41.2142
20.7466	20.9695	12.9453	18.981	18.4145	21.0478		22.8855	22.5208	51.6663	21.3254	34.697	39.8579		26.6417	42.2766	80.7618	41.2166	67.1952	40.1126
20.1095	20.8134	12.6546	18.6939	17.9572	20.0276		22.5923	21.7568	50.6129	20.8691	33.8143	38.5844		25.8438	41.4954	79.7479	40.3643	65.5233	38.7262
19.8939	20.3878	12.5057	18.4731	17.3777	19.4977		22.1922	21.1704	49.4441	20.6427	32.8916	37.3487		25.108	40.9577	78.6777	39.5351	63.5696	37.6131
19.5536	20.0736	12.3608	18.1516	16.8351	18.8331		21.7368	20.6295	48.3196	20.3758	31.9718	36.2587		24.7022	40.2162	77.3257	38.64	62.1739	36.5925
19.4003	19.9739	12.1619	17.8424	16.4003	18.0945		21.4408	20.1068	46.9838	19.9914	30.915	35.1024		24.3606	39.4658	76.1375	38.0274	60.3211	35.4636
19.2977	19.7828	12.0225	17.5519	15.9204	17.6842		21.0656	19.5603	45.8454	19.7384	30.1925	33.8755		24.0628	38.8983	74.9306	37.2607	59.1104	34.3912
19.1113	19.5295	11.8123	17.2616	15.6083	16.9918		20.8472	19.2021	44.9736	19.4401	29.5554	32.9568		23.7027	38.1055	73.5646	36.7102	58.0768	33.0073
19.0635	19.4626	11.7265	16.9446	15.2454	16.4313		20.5215	18.9753	44.2066	19.1319	28.8194	31.8521		23.5492	37.5528	72.4102	35.8781	56.4087	31.9161
18.9051	19.1206	11.4393	16.7667	14.9751	16.0808		20.204	18.7562	42.9326	18.8049	28.2424	31.0027		23.1516	36.8915	71.0287	35.3441	54.8125	30.777
18.7393	18.9138	11.2221	16.5718	14.7521	15.5217		19.7687	18.4384	41.7355	18.3778	27.563	30.0768		22.7	36.2207	69.4523	34.501	53.4897	30.0042
18.6454	18.7433	11.0713	16.6115	14.599	15.0665		19.3955	18.0747	40.7776	18.1926	26.7537	29.2098		22.2241	35.4731	67.7236	33.7498	51.616	28.8567
18.412	18.6014	10.7823	16.2544	14.3588	14.5507		18.9331	17.5473	40.1371	17.9358	26.1663	28.4698		22.0112	34.7	66.6252	33.1376	50.6483	28.068
18.1975	18.3952	10.681	16.1419	14.0954	13.9872		18.5833	17.3618	39.3603	17.5969	25.6251	27.8446		21.7457	34.0012	65.7647	32.5325	49.6183	27.3871
18.0371	18.1515	10.362	15.967	13.6699	13.7905		18.2852	17.0443	38.9242	17.357	25.1539	27.2191		21.3061	33.4519	64.5753	32.0246	48.7035	26.5897
18.0124	18.2044	10.2671	15.7052	13.5302	13.4081		18.0361	17.0232	38.0461	17.3272	24.7762	26.6422		20.9242	33.0184	63.4532	31.6023	47.653	25.7897
17.8302	17.8459	10.1737	15.7451	13.1227	13.0816		17.8037	16.6179	37.2768	17.1856	24.1536	25.9037		20.6578	32.6186	62.7747	31.4147	46.8	25.2712
17.5879	17.8551	9.98867	15.5915	12.9377	12.7611		17.5921	16.4227	36.5595	17.0724	23.6767	25.3804		20.373	32.2799	61.5251	30.8715	45.7443	24.7014
17.4543	17.6851	9.83827	15.5135	12.8306	12.4822		17.3227	16.1558	36.1649	16.9372	23.0241	24.857		20.226	32.0193	60.2393	30.4827	44.7524	23.71
17.3662	17.7177	9.69607	15.1966	12.6241	12.2763		17.185	15.8471	35.6609	16.7674	22.5852	24.4606		19.8039	31.749	59.2515	29.9971	44.1711	23.061
17.1705	17.4606	9.55913	15.0851	12.3912	12.0466		16.8369	15.4944	35.719	16.648	22.2706	23.8806		19.4428	31.3893	58.1645	29.5125	43.4426	22.4176
7808.13	8496.25	8143.67	9873.56	17111.6	21885.7		11548.6	13399.8	28146.4	12567.7	25835.5	24927.4		12137.7	21568.3	39140.5	22100.7	43489.9	29348.1
1	1.08813	1.04297	1.26452	2.19151	2.80293		1.47904	1.71614	3.60475	1.60956	3.3088	3.19249		1.55449	2.76228	5.01279	2.83047	5.56982	3.75866
D21							T21							Q21
0	2	4	8	24	48		0	2	4	8	24	48		0	2	4	8	24	48
787.555	950.238	1551.66	1451.03	2364.83	2591.13		1033.87	1734.62	2770.82	1749	3272.99	2638.2		1723.43	2453.09	4162.2	2977.51	3771.35	2829.7
736.127	889.663	1442.59	1383.98	2227.9	2482.57		965.012	1646.15	2592.43	1655.8	3047.83	2507.29		1646.24	2349.33	3946.83	2801.25	3633.88	2740.46
669.28	818.247	1305.71	1269.53	2054.02	2304.8		879.768	1524.39	2365.99	1522.92	2770	2333.36		1549.27	2206.29	3668.73	2583.74	3454.06	2610.52
570.342	710.619	1110.18	1093.57	1782.31	2007.16		753.516	1327.7	2049.5	1310.93	2354.18	2052.42		1380.22	1949.96	3233.73	2251.99	3167.7	2376.47
476.65	604.963	934.536	925.123	1533.04	1720.39		639.475	1144.57	1767.18	1111.24	1987.17	1792.19		1210.39	1704.73	2829.31	1948.48	2884.05	2141.31
401.811	520.515	779.911	776.867	1305.67	1455.56		539.216	981.43	1527.37	923.778	1667.81	1551.89		1055.52	1466.79	2461.93	1680.92	2595.05	1907.47
324.136	423.247	617.473	615.491	1051.52	1169.75		436.5	799.909	1256	728.447	1331.3	1293.83		891.434	1211.92	2051.14	1382.25	2248.55	1640.07
258.821	339.789	480.209	476.913	822.1	916.912		350.488	642.99	1017.63	565.374	1042.03	1063.18		734.425	984.137	1668.5	1107.01	1896.46	1378.96
205.265	272.188	372.842	369.058	635.815	714.604		280.779	511.639	814.33	435.429	813.342	863.445		594.183	788.15	1337.47	880.298	1570.78	1147.84
170.089	227.746	308.666	302.076	519.362	580.312		238.406	426.594	677.19	355.067	667.757	728.794		493.825	654.629	1111.42	726.026	1334.73	977.283
145.338	195.584	265.424	259.511	439.325	490.127		209.754	366.859	581.927	301.49	570.732	631.651		417.081	556.707	944.925	618.108	1153.78	848.06
125.084	168.564	227.667	223.718	371.774	416.028		185.544	312.605	500.018	257.981	486.447	543.975		352.414	470.126	803.761	524.706	985.344	723.363
107.854	147.579	197.163	194.764	317.373	354.957		164.657	269.176	430.607	221.01	416.693	469.9		296.801	401.573	686.366	449.317	848.258	619.761
95.6296	130.425	173.56	172.741	276.01	310.555		149.782	234.663	379.102	193.791	362.753	413.081		257.787	347.342	596.784	395.529	739.207	539.412
85.8984	118.706	155.184	155.518	245.691	277.013		137.905	208.299	337.781	171.088	321.734	368.679		227.987	306.141	528.559	352.133	661.957	478.343
77.4846	108.924	141.16	140.505	219.755	249.15		128.145	185.884	304.255	152.951	287.369	333.21		204.323	274.542	472.251	316.978	599.382	428.379
70.8356	100.306	128.03	127.143	198.179	224.681		118.951	167.6	274.944	137.733	257.937	301.7		181.745	247.977	424.328	287.211	546.109	384.898
65.2838	92.67	116.449	116.637	178.546	203.598		112.036	151.273	249.643	124.083	231.863	273.609		165.137	225.517	382.825	261.983	499.601	348.487
60.1819	86.0083	106.529	105.681	161.718	184.357		104.679	136.523	228.898	112.3	208.194	249.107		149.738	205.942	348.036	240.869	460.135	315.862
55.9944	80.9608	99.09	98.2691	148.518	169.587		99.8453	125.604	213.301	103.514	190.73	229.92		137.505	190.231	321.929	224.423	427.811	291.114
52.5848	75.7989	91.6797	91.0698	136.17	157.057		95.1003	115.64	198.313	95.5585	175.2	212.231		126.583	175.12	298.124	208.863	399.127	268.957
49.3965	71.628	85.6704	84.7762	126.103	144.805		90.7803	107.076	184.59	88.3305	161.106	195.995		118.032	162.326	277.26	193.997	373.763	249.034
46.6797	67.6338	80.4757	79.468	116.702	134.658		87.3912	99.9812	172.865	82.7131	149.866	182.038		111.278	151.828	259.717	182.165	352.365	232.669
44.0893	63.8979	75.6561	74.684	109.118	125.044		84.1913	92.8623	162.437	77.8421	138.518	169.568		103.801	142.79	243.72	170.444	333.136	216.03
41.9281	60.7487	71.5534	70.7623	101.955	116.769		81.4388	86.7726	152.248	73.1188	128.61	158.345		97.0015	133.999	228.857	161.198	314.08	202.118
39.6932	57.9175	67.6491	66.4894	95.1086	108.534		78.582	81.6137	143.807	68.943	118.874	147.298		89.6399	126.152	213.824	151.717	297.329	188.018
38.2127	55.1713	64.4132	63.2068	89.2249	101.714		76.1377	77.1583	136.711	65.5112	111.043	138.138		84.8998	119.473	201.989	143.582	283.609	175.797
36.6294	52.5754	61.5075	60.3048	83.8486	96.0078		74.3059	73.4878	130.776	61.9417	105.031	129.638		80.1908	112.889	191.193	136.617	270.561	164.852
35.4193	50.4669	58.64	56.9942	78.8607	90.2582		72.3145	69.4461	124.141	58.9462	98.2756	121.75		76.1903	106.669	181.795	129.543	258.84	155.342
33.7954	48.3775	55.306	54.4567	74.3841	85.0229		70.5742	66.21	118.477	55.953	93.1841	114.487		71.9368	100.325	173.357	123.656	247.557	146.169
32.6358	45.9908	52.1901	51.6653	69.8386	80.1388		69.0248	62.7243	111.762	53.8015	87.7657	107.644		68.231	94.9967	165.745	117.813	236.89	137.791
31.0476	44.2748	49.3834	48.7866	66.0759	75.978		67.3683	59.9423	106.503	51.2679	82.664	101.16		65.3074	89.8513	158.627	112.798	227.324	129.907
29.9431	42.2727	47.1284	46.6748	62.5085	71.9823		66.0702	56.6441	102.405	49.2505	78.2353	95.8367		62.3409	85.1036	150.398	107.267	217.98	123.283
28.9122	40.8735	45.1453	44.4382	59.2027	67.995		64.4144	54.1553	99.0375	47.0966	74.0313	90.5648		59.8261	81.3819	144.072	102.403	209.604	116.822
27.9212	39.2005	43.7354	42.3636	56.2802	64.6093		63.0622	51.8192	95.5972	44.9599	70.3982	85.6857		57.981	78.0158	138.728	98.5249	201.282	111.595
27.1991	37.9919	42.3418	40.7726	53.5092	61.8667		62.1454	49.9465	92.3534	43.1428	67.5589	81.4555		56.1002	74.7815	134.223	95.0864	194.214	106.37
26.4399	36.5494	40.6147	38.9788	50.4323	58.8216		60.9254	48.2336	89.7971	42.0563	64.4171	77.755		53.9745	71.6932	129.991	92.2561	187.579	101.281
25.7332	35.1981	38.9782	37.1948	47.4268	55.9336		59.8876	46.0416	87.1841	40.6503	61.2366	73.9713		52.256	68.7846	126.254	88.8082	181.23	96.651
24.9318	34.2097	37.4295	36.1518	44.9278	53.2201		58.9884	44.3932	84.0113	38.913	58.2299	70.1034		50.0674	66.2532	122.07	86.0326	174.92	91.9366
24.2894	33.1577	36.0558	34.9264	42.8459	51.324		58.2108	42.69	81.1633	37.8886	55.4815	66.8948		48.3383	63.5066	117.895	84.1206	169.169	88.2964
23.6487	32.4009	34.6172	33.8222	40.7421	48.9994		57.2638	41.2162	78.6606	36.5958	53.1587	64.0656		46.627	62.2605	114.255	81.5711	163.787	84.5395
22.7574	31.0313	33.4493	32.6334	38.9054	46.9742		56.4922	39.717	75.5622	35.3638	51.2173	60.87		44.8789	60.6502	110.757	79.4234	158.253	80.9547
22.3387	30.1637	32.2859	31.5257	36.921	45.1715		55.7595	38.3825	73.0103	34.2624	49.5596	58.186		43.1982	59.6068	107.825	76.6089	153.98	77.7404
21.8673	29.2908	31.3789	30.4709	35.3757	43.4696		54.9636	36.9533	71.0397	32.9613	47.7863	55.4386		41.9482	57.2799	104.951	74.1383	149.936	74.1801
21.3004	28.3387	30.0795	29.4066	33.4808	41.9787		54.4123	35.6689	69.2095	32.3716	45.9504	53.1826		41.3292	55.6598	101.05	71.6961	146.328	71.3992
20.8028	27.8548	29.5557	28.8005	32.0975	40.0637		53.758	34.4499	67.3486	31.6082	44.3331	51.2811		40.2049	53.4834	97.5407	69.3695	142.961	68.8572
20.3914	26.983	28.505	27.9297	30.8735	38.5844		53.3084	33.3004	65.8972	30.8566	42.3317	49.3117		38.8236	51.4119	94.0084	67.7456	139.025	66.3309
19.828	26.7208	27.981	27.602	29.7134	37.1418		52.914	32.2518	64.516	30.0533	40.5316	47.2174		37.7568	49.4233	91.3031	65.9947	135.72	63.8858
19.6028	26.1337	27.2425	27.0564	28.611	35.8013		52.5075	31.3493	62.8774	29.3329	38.8903	45.0835		36.2889	47.3807	89.4741	64.7715	132.633	61.7457
19.1893	25.8128	26.7856	26.4985	27.6139	34.4348		51.8459	30.3855	61.5151	28.7534	37.5843	43.4639		35.3976	45.3174	87.0946	63.1206	129.273	59.4134
18.9388	25.259	26.2486	26.0664	26.44	33.3752		51.4948	29.2893	60.0385	28.1144	36.3621	41.456		34.131	43.6948	85.0743	61.5	126.657	57.4845
18.4259	24.8108	25.9859	25.4414	25.5696	32.0758		51.1945	28.5145	58.6226	27.5437	35.1364	39.681		32.9034	42.6147	82.8598	59.9028	123.499	55.9626
18.041	24.4464	25.2687	24.7893	24.8264	31.1592		51.0738	27.6543	57.4284	26.9521	33.9534	38.3304		32.521	41.7304	81.1448	58.9584	121.243	53.7801
17.7603	24.2075	24.8084	24.565	24.1946	29.9227		50.5507	27.0186	55.8445	26.3957	32.6121	36.9252		31.8375	40.8278	79.331	57.4736	118.82	52.3838
17.3854	23.7237	24.1923	24.4755	23.0183	29.1334		50.1792	26.2936	54.6678	25.8041	31.7304	35.7708		31.4244	39.4615	77.2789	56.3689	116.656	50.4286
17.3859	23.5721	23.561	24.3792	22.3193	28.0623		49.8911	25.5526	53.8793	25.3143	30.8467	34.5362		30.7294	38.2537	75.0158	55.1779	114.22	48.9064
17.0376	23.1063	22.762	23.66	21.4718	27.2491		49.6376	24.9048	53.3237	24.6227	29.8332	33.4736		29.9588	37.1943	73.4292	54.1279	112.374	47.4196
16.7935	22.83	22.1213	23.059	21.0464	26.2649		49.3828	24.2145	52.8845	24.1793	29.2498	32.4919		28.8559	36.0041	71.6455	53.3836	110.13	45.8217
16.4644	22.5695	21.6236	22.8374	20.3945	25.5363		49.0945	23.539	51.9404	23.6183	28.3989	31.5747		27.9482	35.0752	70.5899	52.6011	107.86	44.3229
16.318	22.175	21.1718	22.5424	19.7271	24.8584		48.8352	22.9078	50.9578	23.1099	27.9746	30.5557		27.7578	34.2365	69.0116	51.3963	106.041	42.7514
16.0732	21.8903	20.6899	22.1525	19.1896	24.1747		48.5106	22.6027	50.1533	22.8808	27.1552	29.5674		27.0533	32.8469	67.8654	50.6737	104.432	41.5865
15.9996	21.47	20.5493	21.9453	18.8204	23.6755		48.3858	22.2791	49.7856	22.4646	26.9524	29.337		26.7594	32.3693	66.6416	49.8536	102.279	40.2831
15.8129	21.2045	20.1356	21.6845	18.4014	23.0324		48.1604	22.0343	49.3025	22.2154	26.2181	28.5825		26.3513	31.4986	65.6429	49.0481	100.76	39.4439
15.5795	20.7483	19.7207	21.2672	17.9524	22.3844		47.9455	21.6367	48.9101	21.8416	25.5594	27.9504		26.1276	31.2047	64.8074	48.3169	99.2746	38.2703
15.3569	20.323	19.3862	21.1552	17.5348	21.8933		47.6995	21.3676	48.3713	21.4626	25.0183	27.1961		25.6667	30.7197	63.9079	47.4096	98.0983	37.3236
15.3227	20.2628	18.8912	20.8978	17.053	21.3667		47.5658	20.9583	47.2531	21.1477	24.3522	26.6271		25.413	30.0868	62.9462	46.4284	97.128	36.5093
14.9589	19.9961	18.6397	20.7145	16.6437	20.8201		47.2015	20.4051	46.4984	20.991	23.6981	25.8521		25.1725	29.0183	61.5629	45.4708	96.4628	35.3966
14.9588	19.8262	18.2334	20.6591	16.261	20.3153		47.0981	19.937	45.7534	20.6249	23.0981	25.1463		24.3469	28.3306	60.6294	44.4094	95.1952	34.6158
14.7801	19.6525	18.0051	20.2083	15.8639	19.8225		46.906	19.547	45.0779	20.3868	22.7151	24.4776		23.9327	27.5724	59.3153	43.3162	93.877	33.8502
14.4987	19.4484	17.7118	20.1371	15.5879	19.3955		46.7185	19.1649	44.4877	20.0173	22.0804	23.766		23.4746	27.4269	58.387	42.8108	92.3893	33.1278
14.5933	19.2607	17.4199	19.8872	15.2398	18.9847		46.7113	18.8079	44.1946	19.8939	21.7291	23.163		23.5447	26.7841	57.3696	42.2708	91.5824	32.4485
14.3503	19.103	17.3218	19.8189	14.8835	18.5389		46.762	18.421	43.7661	19.5151	21.0836	22.7748		23.2248	26.1117	56.2225	41.768	90.1164	31.6755
14.2218	18.7086	16.9181	19.4445	14.6329	18.1997		46.5008	18.1756	43.4754	19.1848	20.6759	22.5348		22.9619	25.2634	55.0758	41.5118	89.1531	31.0808
14.0498	18.4506	16.6536	19.3048	14.4157	17.911		46.4883	17.9581	42.8062	18.9852	20.0143	21.9795		22.572	24.5113	53.7923	40.9011	88.3145	30.3448
13.962	18.4195	16.5206	19.1462	14.1066	17.669		46.2305	17.7958	42.5138	18.9205	19.4973	21.583		22.1948	23.9329	53.1451	40.492	87.5493	29.5377
13.8606	18.0839	16.21	18.7908	13.9167	17.3883		46.17	17.5783	42.7801	18.5685	19.1267	21.1167		21.9179	23.5484	52.7883	39.8118	87.0609	29.1803
13.6857	17.8753	15.9727	18.6816	13.6965	17.0176		45.9871	17.3163	43.0027	18.2673	18.4853	20.7573		21.3531	23.3831	52.0703	38.8614	86.2431	28.5223
6825.48	8837.03	12508.2	12265.7	19255.5	21667.8		10814.8	15234.9	24830.5	14237	25423.5	24365.3		16330	22507.2	38414.7	26626.3	42818.1	29622.2
1	1.29471	1.83257	1.79705	2.82112	3.17455		1.58448	2.23205	3.63791	2.08586	3.72479	3.56975		2.39251	3.29753	5.62813	3.90101	6.27326	4.33994
D21							T21							Q21
0	2	4	8	24	48		0	2	4	8	24	48		0	2	4	8	24	48
463.817	1063.33	1417.19	1436.09	2030.74	2516.02		1236.91	2108.06	2144.11	1986.89	2758.55	3166.71		251.203	3482.23	2560.95	1718.39	2794.18	2144.64
442.086	989.214	1327.12	1338.98	1885.02	2348.71		1157.93	1999.89	2035.65	1858.96	2625.85	2985.64		236.633	3330.43	2456.77	1641.76	2639.73	2071.93
407.904	900.763	1211.15	1219.45	1697.36	2129.12		1052.59	1850.74	1876.25	1694.84	2448.85	2741.97		221.019	3139.35	2308.17	1527.94	2445.07	1957
351.73	758.437	1032.1	1037.96	1420.63	1784.67		897.628	1612.92	1619.14	1443.6	2161.77	2369.45		193.455	2834.93	2063.96	1344.93	2138.05	1758.87
297.779	637.94	862.006	870.064	1187.38	1474.59		762.473	1391.76	1382.86	1219.78	1891.61	2017.8		167.77	2557.57	1826.14	1175.26	1852.33	1563.28
250.945	529.073	715.257	723.894	986.08	1209.66		641.154	1190.56	1178.9	1023.53	1636.91	1710.5		146.722	2279.12	1589.43	1026.72	1586.52	1372.52
206.435	417.832	554.732	570.518	777.621	936.687		512.15	971.034	971.124	826.174	1358.27	1385.11		121.459	1936.7	1321	855.043	1295.45	1158.43
167.802	323.72	425.722	441.082	601.795	720.184		401.523	768.158	785.708	655.985	1110.29	1102.76		99.8416	1591.45	1069.42	694.709	1033.17	954.331
135.877	256.637	329.513	339.503	467.582	556.342		315.099	602.332	625.554	515.502	910.209	874.216		80.921	1274.15	849.702	553.604	820.373	772.97
114.792	213.829	268.865	278.492	382.529	455.358		260.125	491.039	516.359	421.173	779.057	721.986		67.2876	1048.25	698.754	457.685	680.298	646.794
98.2013	185.365	228.861	237.912	324.265	389.731		223.089	415.501	440.61	356.871	687.165	615.2		57.2861	891.416	591.539	390.328	581.073	553.731
84.2664	161.249	196.002	204.212	274.633	332.46		191.914	353.953	373.954	306.109	606.944	523.504		47.9891	754.742	501.685	332.718	496.326	468.626
73.8025	142.107	168.888	175.751	235.119	286.944		165.782	302.708	321.022	261.89	534.73	446.147		41.1821	646.707	426.428	284.875	427.177	397.354
64.3387	126.277	148.913	154.859	203.963	251.843		145.112	265.406	281.15	229.697	479.499	388.822		36.0595	563.838	370.89	249.134	375.677	346.113
57.4749	114.846	133.447	138.848	180.858	223.785		129.875	236.628	251.132	205.329	434.456	345.414		32.1625	499.879	329.247	221.896	333.251	306.339
52.0197	104.618	120.3	125.938	162.012	200.017		117.429	213.187	226.113	184.873	400.104	310.064		29.2654	445.668	294.138	199.364	297.354	273.255
47.1669	96.638	108.581	114.606	146.132	181.598		107.381	194.159	204.327	166.736	369.775	279.547		26.4833	402.772	265.202	179.658	268.056	245.097
43.1646	88.8081	99.0113	103.618	131.283	164.684		97.8161	177.01	185.063	150.702	340.781	252.818		24.2008	365.582	239.888	163.22	241.266	221.736
39.5184	82.4308	91.038	95.0926	119.314	149.544		89.8854	162.383	167.586	137.013	318.442	230.176		22.3492	334.779	219.234	148.862	218.068	200.669
37.147	77.5072	84.311	88.4309	109.664	138.308		83.5069	150.709	153.988	126.985	299.444	212.751		20.8684	311.121	202.643	137.405	200.384	184.064
34.9491	73.298	78.0397	81.951	100.909	127.985		78.1148	140.081	141.549	117.341	284.613	196.677		19.4389	288.123	187.804	127.168	184.022	170.333
32.3345	68.9907	72.6537	76.398	93.3189	118.258		72.9757	130.812	130.078	109.725	270.901	182.55		18.3066	268.166	174.494	118.304	169.588	157.355
31.1961	65.3188	68.1778	70.9336	86.9593	110.813		69.1309	122.835	120.127	102.981	258.55	171.184		17.3946	251.044	162.935	110.662	157.407	146.478
29.4523	62.5496	64.3734	66.2109	81.1949	103.438		65.5084	115.494	111.6	96.9906	247.674	159.916		16.4249	236.15	153.179	103.744	146.763	137.088
27.9056	59.6806	60.8718	62.1686	75.587	96.4293		62.2625	108.839	103.4	91.206	237.756	149.468		15.4658	222.623	142.657	97.5449	136.035	128.356
26.1941	56.8528	57.5427	58.8417	71.5109	90.5965		59.0484	103.187	95.913	86.6776	227.296	139.98		14.6306	209.629	134.854	91.7813	126.815	120.096
25.2492	54.3668	54.643	55.322	67.0933	85.4296		56.0006	97.993	89.9222	82.4051	219.331	131.615		13.9646	197.787	127.33	86.3839	118.72	113.647
23.8204	52.4396	52.0837	52.6641	63.5095	80.4565		53.5626	93.4699	84.5152	79.1882	210.632	124.69		13.2938	189.397	121.19	82.5403	112.059	107.577
22.9009	50.7748	49.9352	49.9632	60.2851	75.6404		51.2317	89.2244	79.4058	75.8014	204.171	118.009		12.7029	180.914	114.411	78.7802	105.657	101.949
21.9423	48.5592	47.7948	47.5213	57.3164	71.6584		49.4318	85.5939	75.3728	72.8743	198.072	111.081		12.139	174.927	108.377	74.897	99.5004	96.9556
20.7485	47.1142	45.7216	45.1408	54.0425	67.945		47.8225	82.0116	70.9567	69.9164	192.637	105.563		11.6989	167.479	103.17	71.6665	93.6208	92.6703
20.1869	45.3323	43.9524	42.9638	51.5173	64.8258		46.1401	78.8524	67.4558	67.0207	187.432	100.431		11.3602	161.01	98.9871	68.4729	88.8727	87.9626
19.0246	44.1593	42.2705	40.9651	49.2696	61.5903		44.4291	76.1902	63.9082	64.3903	183.26	95.5072		10.8582	153.453	94.7589	66.0233	84.393	83.831
18.3286	42.3772	40.3725	39.0986	46.9364	58.3471		42.5336	73.5423	60.6849	62.0437	179.428	90.9152		10.5608	147.798	90.6372	63.3146	79.6903	79.962
17.8376	41.1611	38.9135	37.5636	44.7384	55.7514		40.7033	70.8792	57.752	59.3555	177.415	87.051		10.1848	142.969	87.3719	60.7279	76.4734	76.6142
17.2862	39.9487	37.6581	36.1938	43.14	53.6627		39.408	68.6499	55.31	57.1104	176.792	82.9766		9.68476	137.939	84.3755	58.6145	72.9231	73.6333
16.8703	38.5659	36.1554	34.7045	41.3193	50.9229		38.338	66.1835	53.3451	54.8927	175.141	78.979		9.32724	134.106	81.1818	56.2692	70.1771	70.8017
16.3638	37.6572	34.6721	33.2181	39.4867	48.7639		36.9984	63.5682	51.3315	53.2641	170.798	76.0533		9.21412	129.533	77.8916	54.1734	66.5843	68.3489
16.0913	36.38	33.3166	32.3165	38.1666	46.6612		35.7357	61.4895	49.2973	51.766	165.555	72.5619		8.85138	125.26	75.1158	52.6049	63.8621	65.6729
15.695	35.5569	32.1261	31.1642	36.7792	45.0719		34.8732	60.0957	47.6784	50.6161	160.027	69.4928		8.73641	121.702	72.5466	51.2523	61.6661	63.1917
15.1031	34.7323	31.2242	30.5682	35.3376	43.5645		33.9398	58.0248	46.0609	48.713	156.434	66.4643		8.40376	118.853	69.6286	49.4355	58.8929	61.5241
14.7252	33.5889	30.4086	29.6091	34.0725	42.0875		33.0554	56.0912	44.7193	47.4206	152.834	63.782		8.12185	115.704	67.2576	47.9756	56.7921	59.1733
14.4323	32.922	29.7961	28.6548	32.7128	40.5932		32.1456	54.3471	43.3206	45.8363	148.68	60.6469		7.97585	112.376	64.6456	46.5239	54.8717	57.0868
13.9144	32.0352	28.7279	27.7139	31.3499	39.2294		31.6072	52.9016	41.6032	44.3628	145.223	58.1976		7.85388	109.187	62.6616	44.8377	52.9628	55.0156
13.5816	31.5196	27.8952	27.0205	30.4357	37.8379		30.8461	51.5164	40.3825	42.9171	142.004	56.1123		7.73718	106.439	60.6984	43.5079	51.1945	53.2562
13.4526	30.851	27.3766	26.1447	29.5245	36.5541		30.1899	50.1767	39.1899	41.714	139.937	54.072		7.52656	102.631	58.897	42.2776	49.0982	51.6803
12.8901	30.335	26.5984	25.5651	28.367	35.1975		29.5109	48.9273	38.3445	40.696	137.771	52.0769		7.32659	100	57.2826	41.3247	47.4378	50.2664
12.7333	29.689	26.2174	24.6107	27.4904	34.0003		28.8511	47.7064	37.593	39.6838	136.109	50.5854		7.15926	96.7636	55.6542	40.5282	45.9208	48.7644
12.3304	29.2459	25.6458	24.0044	26.444	32.7466		28.1178	46.5396	36.7588	39.1751	134.703	48.8633		7.03626	94.3659	54.5575	39.5195	44.1243	47.2279
12.2603	28.6408	25.114	23.3827	25.4558	31.5823		27.4925	45.4473	35.7211	38.518	132.779	47.1798		6.93282	92.0775	53.3431	38.8912	42.8263	46.0279
12.1145	27.9892	24.6626	22.7231	24.6767	30.5052		27.0452	44.4626	34.6094	37.6999	132.904	45.5539		6.75409	89.3377	52.3302	37.8706	41.5074	44.8979
11.8083	27.492	24.0959	22.2279	23.791	29.2073		26.7006	43.5433	33.5158	36.8156	131.918	44.084		6.59803	86.606	51.2608	36.9975	40.047	43.536
11.4913	27.0362	23.2524	21.8259	23.1514	28.4538		26.1725	42.6907	32.6523	36.1526	130.514	42.4602		6.41932	83.5747	50.1064	36.2354	39.1444	42.5197
11.3023	26.557	22.4626	21.1257	22.5403	27.6863		25.9422	41.6487	31.5958	35.4681	129.777	41.0495		6.25888	81.7211	48.8159	35.4383	38.3005	41.3816
11.2132	26.264	21.8704	20.7082	21.7456	26.8374		25.3054	40.8548	30.9069	35.2892	128.051	39.6704		6.18703	79.9824	47.4954	34.4641	37.3624	40.4172
11.0422	25.8829	21.3914	20.5057	21.3137	26.1165		24.98	39.9824	30.2972	34.3056	127.009	38.2724		6.00585	78.6503	46.5269	33.9331	36.7549	39.128
10.8938	25.4855	20.9692	20.1678	20.8909	25.0807		24.4065	39.1866	29.562	33.4346	125.754	37.0738		5.96253	77.1834	45.9482	33.3602	35.7248	38.1635
10.7356	25.181	20.7094	19.7508	20.2204	24.5065		24.0918	38.4569	29.2227	32.8308	124.705	36.2382		5.80953	75.1547	45.4494	32.5823	34.6368	37.3555
10.6935	24.7586	20.4247	19.4893	19.8671	23.7091		23.499	37.6174	28.5671	31.958	124.589	35.3158		5.70453	74.4546	44.6159	32.1844	33.6036	36.6812
10.3696	24.3281	19.9686	19.4662	19.3599	23.1327		23.2063	37.066	27.9794	31.0527	123.101	34.1346		5.56153	73.7363	43.6235	31.4054	33.0196	35.7688
10.1183	23.9044	19.6812	18.9858	18.7896	22.2103		22.9651	36.528	27.5428	30.3982	122.94	33.3474		5.49929	73.1276	42.2916	30.7618	32.3588	35.0602
10.165	23.4166	19.333	18.7116	18.4692	21.6413		22.4766	35.9821	26.8761	29.5868	121.289	32.4038		5.36065	72.1495	41.3731	30.0615	31.9295	34.3255
10.1251	23.0835	18.818	18.5269	17.7971	21.1432		22.2538	35.2934	26.4121	29.0782	120.377	31.8773		5.24215	70.1751	40.5627	29.4883	31.3847	33.8071
9.78019	23.0778	18.5043	18.1055	17.3427	20.6505		21.9453	34.8939	26.0389	28.7659	119.507	31.3087		5.21276	67.9831	40.0104	29.0269	30.6473	33.0874
9.76081	22.641	18.143	17.5656	16.9359	20.0822		21.7852	34.4709	25.5813	28.5821	118.134	30.585		5.11341	67.1144	39.466	28.4889	30.1055	32.4217
9.551	22.4094	17.7559	17.3039	16.4014	19.545		21.4726	33.7798	25.2181	28.0545	117.195	29.7346		5.02932	65.585	39.1288	28.0349	29.2923	31.8835
9.29539	22.2764	17.2641	16.801	15.8743	19.1256		21.1443	33.3618	24.9483	27.5222	116.639	29.0651		5.01321	64.8213	38.4987	27.4874	28.8422	31.3227
9.34885	22.0054	17.029	16.553	15.617	18.572		20.9827	32.8527	24.5614	27.0231	115.766	28.3319		4.85544	63.4566	37.9286	27.1177	28.2927	30.6013
9.39781	21.781	16.7898	16.2415	15.1835	18.1897		20.7491	32.5894	24.3278	26.6401	114.937	27.8205		4.785	61.7393	37.3157	26.652	27.7422	30.0177
9.29447	21.5069	16.5565	16.0712	14.8178	17.8132		20.4727	32.1648	24.0188	26.0443	113.431	27.2178		4.73209	60.4603	36.7636	26.1098	27.2986	29.3478
9.27551	21.3814	16.1592	15.7472	14.4054	17.4878		20.5163	31.7331	23.662	25.6813	112.354	26.8847		4.65985	59.1584	36.1891	25.5877	26.7823	28.7384
9.09939	21.0887	16.1848	15.5869	14.1429	17.2468		20.2421	31.4024	23.2589	25.3025	110.99	26.4231		4.62347	57.3313	35.6403	25.0234	26.4458	28.2232
9.03014	20.8185	15.9192	15.3394	13.8949	17.0373		20.0771	30.9242	22.7628	24.853	110.811	25.7992		4.56844	56.3441	35.2377	24.7325	25.5419	27.8748
8.92401	20.7713	15.5502	15.2547	13.6792	16.8492		19.8583	30.6226	22.4534	24.4445	109.46	25.4819		4.47621	55.4624	34.8658	24.5179	25.0087	27.5675
8.83915	20.6131	15.3017	15.1371	13.3893	16.3442		19.6189	30.3594	22.3293	23.9133	108.393	25.1094		4.41144	54.4751	34.5124	24.1358	24.4727	27.0889
8.57096	20.451	14.8904	14.8949	13.1729	16.1746		19.3419	29.9036	21.9408	23.7037	107.883	24.8139		4.4335	53.2548	34.2308	23.8422	23.9402	26.6037
8.46523	20.2534	14.6019	14.6635	12.9395	15.6997		19.2451	29.7201	21.5215	23.5365	106.184	24.1737		4.37056	52.5665	33.961	23.4874	23.6113	26.1945
4296.77	9217.72	11301.6	11447.4	15308.7	18918.9		10525.9	18720.9	18476.3	16505.4	30931.3	26457.5		2398.12	35234.7	24197.2	16112.3	24186.5	21084.3
1	2.14527	2.63025	2.66418	3.56283	4.40306		2.44972	4.35697	4.30003	3.84134	7.19872	6.15753		0.558121	8.20027	5.63149	3.74985	5.629	4.90701

## Sheet: Figure 1-source data D
D21							T21							Q21
0	2	4	8	24	48		0	2	4	8	24	48		0	2	4	8	24	48
1389.18	1818.58	1144.74	1832.64	1829.22	2678.08		1031.11	3044.5	3043.65	3630.62	1641.35	3170.8		1351.06	2589.55	3991.75	2213.06	3575.24	3311.45
1393.52	1823.05	1159.93	1854.18	1835.49	2694.07		1034.94	3052.42	3060.85	3634.12	1647.36	3186.59		1366.26	2616.4	3990.91	2221.21	3623.54	3316.61
1396.21	1829.52	1178.4	1863.09	1845.46	2692.69		1039.06	3066.86	3092.35	3630.34	1642.97	3192.46		1380.15	2648.62	3997.15	2237.72	3675.9	3348.89
1410.6	1841.32	1194.96	1871.89	1849.07	2691.91		1049.18	3082.6	3135.4	3632.1	1654.29	3214.14		1400.93	2687.22	4000.17	2270.73	3733.49	3389.96
1425.59	1844.47	1212.03	1872.46	1842.69	2681.05		1053.12	3085.88	3156.54	3635.45	1680.16	3215.6		1417.57	2707.4	4020.82	2303.8	3771.69	3412.28
1435.84	1842.25	1228.97	1872.81	1840.65	2682.34		1062.88	3101.24	3166.98	3638.28	1703.39	3219.04		1426.11	2711.45	4028.34	2316.7	3806.97	3412.54
1446.42	1832.34	1239.15	1853.78	1836.84	2680.03		1066.13	3081.89	3171.96	3618.95	1720.29	3205.81		1441.6	2711.8	4038.61	2314.85	3840.2	3406.88
1456.69	1821.57	1228.99	1839.1	1826.72	2674.36		1066.51	3058.71	3151.46	3586.21	1725.9	3186.85		1450.92	2699.25	4021.47	2294.88	3867.01	3385.76
1454.04	1813.16	1214.44	1809.96	1815.85	2663.59		1061.63	3016.23	3109.13	3531.85	1722.89	3157.11		1456.66	2675.33	3982.65	2263.16	3882.44	3353.01
1445.59	1801.12	1192.76	1786.45	1805.51	2644.86		1048.86	2973.36	3056.74	3476.96	1716.39	3127.31		1454.44	2650.54	3937.39	2229.93	3893.06	3326.32
1429.72	1779.12	1177.95	1768.39	1805.66	2615.94		1036.15	2933.26	3014.43	3430.93	1706.3	3087.92		1447.58	2625.66	3884.52	2195.9	3884.29	3278.01
1410.75	1753.94	1153.64	1739.8	1784.22	2578.71		1022.63	2879.91	2961.62	3370.24	1693.06	3040.79		1439.64	2582.43	3840.48	2159.71	3867.93	3222.86
1388.46	1719.45	1136.43	1701.94	1770.16	2550.27		1014.25	2822.15	2901.16	3300.28	1676.83	2984.02		1429.26	2542.89	3753.63	2117.67	3858.11	3157.94
1367.46	1691.28	1115.09	1672.45	1735.67	2509.03		1004.15	2775.03	2854.07	3240.85	1662.45	2928.74		1418.94	2502.59	3686.62	2082.05	3825.47	3094.76
1349.4	1666.86	1101.69	1646.41	1703.15	2461.25		995.847	2720.63	2810.37	3189.39	1653.86	2878.25		1403.07	2469.62	3623.86	2040.37	3807.71	3032.13
1329.76	1642.62	1086.74	1618.69	1681.79	2420.69		984.029	2676.18	2769.98	3147.42	1648	2834.36		1389.48	2435.67	3561.17	2010.16	3786.9	2975.22
1314.25	1620.15	1068.63	1596.4	1653.73	2381.66		971.009	2632.18	2733.12	3100.77	1640.7	2801.03		1373.79	2401.8	3508.52	1979	3773.73	2911.52
1297.12	1600.92	1052.2	1573.61	1633.68	2345.75		958.37	2591.37	2700.23	3049.3	1626.15	2754.53		1359.24	2365.84	3442.6	1945.7	3761.86	2847.36
1283.75	1578.44	1035.41	1555.3	1604.72	2305.65		948.487	2562.26	2665.49	3000.47	1609.51	2706.71		1344.67	2334.09	3394.89	1921.09	3731.76	2795.46
1277.83	1559.53	1024.5	1537.29	1581.6	2283.38		935.549	2536.99	2636.58	2958.52	1590.46	2660.99		1328.18	2309.35	3336.56	1890.22	3716.69	2745.49
1272.97	1538.27	1008.5	1523.31	1557.92	2253.3		926.571	2508.7	2601.02	2919.27	1571.68	2611.19		1312.2	2281.9	3285.91	1866.84	3692.96	2702.8
1261.62	1519.76	996.399	1510.64	1539.29	2231.57		912.776	2480.22	2563.03	2889.23	1552.97	2567.03		1298.96	2256.27	3239.52	1843.61	3664.48	2660.36
1252.92	1506.73	985.519	1499.47	1522.81	2209.01		902.244	2451.79	2529	2855.81	1531.65	2536.59		1286.58	2230.84	3198.68	1815.65	3639.4	2623.7
1239.97	1491.98	972.057	1485.2	1508.43	2180.66		894.139	2435.39	2501.27	2819.33	1513.43	2499.74		1277.62	2206.1	3159.32	1793.23	3623.57	2585.11
1233.83	1481.61	959.85	1468.37	1489.4	2152.63		886.366	2410.73	2472.39	2782.95	1491.94	2460.38		1268.47	2188.44	3115.67	1764.76	3596.69	2547.45
1224.73	1468.08	943.767	1451.68	1470.87	2119.82		880.656	2391.28	2444.94	2742.85	1478.63	2423.46		1257.11	2167.25	3075.2	1739.46	3571.01	2518.96
1215.1	1459.28	932.721	1435.4	1446.66	2094.28		875.918	2370.71	2419.81	2713.34	1467.21	2392.52		1247.69	2148.91	3036.76	1716.96	3547.96	2496.77
1209.5	1446.56	924.468	1422.89	1423.76	2074.03		870.491	2341.54	2394.31	2685.74	1453.24	2372.37		1235.47	2132.61	3002.58	1700.99	3528.61	2476.81
1204.19	1431.24	913.619	1406.39	1403.17	2052.88		862.377	2317.56	2370.07	2655.41	1440.3	2346.79		1224.59	2115.39	2969.47	1685.85	3493.82	2446.91
1199.22	1421.46	903.372	1389.49	1380.12	2035.05		855.929	2290.13	2343.21	2632.51	1428.63	2315.12		1213.79	2096.69	2948.86	1673.6	3464.59	2407.49
1193.7	1410.15	893.602	1373.1	1358.45	2008.94		848.09	2266.83	2322.33	2602.58	1419.49	2286.1		1205.38	2073.28	2929.13	1658.97	3416.68	2370.5
1186.29	1396.88	883.02	1359.16	1338.2	1986.63		842.273	2247.22	2293.11	2582.07	1407.2	2255.56		1196.69	2052.36	2901.77	1645.23	3376.11	2333.72
1180.57	1386.59	871.12	1348.08	1318.99	1956.02		833.011	2227.06	2264.96	2550.1	1389.62	2232.84		1184.44	2033.59	2880.32	1632.47	3330.79	2298.6
1170.1	1377.46	861.788	1336.05	1307.92	1936.78		825.681	2208.69	2237.19	2518.32	1372.73	2202.78		1176.26	2012.83	2852.52	1618.17	3300.48	2261.74
1159.13	1369.52	854.548	1328.58	1294.15	1910.33		816.753	2187.39	2213.64	2496.75	1356.1	2174.06		1168.52	1995.62	2828.1	1598.8	3269.76	2232.68
1150.74	1358.29	846.379	1322.11	1278.37	1888.26		804.446	2167.95	2192.66	2475.8	1345.59	2147.94		1157.65	1979.34	2804.42	1587.7	3228.76	2205.69
1143.2	1346.32	839.673	1316.14	1268.42	1870.01		798.307	2145.76	2169.58	2463.08	1336.07	2123.41		1152.32	1964.63	2773.3	1565.85	3199.29	2183.29
1132.25	1335.77	832.681	1307.21	1257.23	1848.54		790.396	2123.8	2145.72	2442.32	1321.94	2098.57		1141.06	1948.92	2742.51	1554.2	3161.91	2156.76
1127.28	1322.93	823.528	1297.87	1250.74	1826.77		781.182	2099.86	2127.5	2426.91	1312.07	2075.26		1134.87	1931.83	2711.72	1537.68	3132.02	2136.25
1117.92	1312.37	815.315	1289.09	1245.83	1807.23		774.901	2081.12	2107.34	2410.19	1303.08	2052.81		1131.48	1916.99	2683.36	1517.31	3108.65	2111.72
1110.89	1304.58	807.954	1280.88	1231.65	1789.21		768.23	2067.34	2090.99	2389.26	1290.4	2028.23		1121.66	1902.62	2656.19	1504.68	3073.45	2091.71
1100.15	1296.65	800.293	1268.82	1213.32	1769.13		764.072	2047.82	2075.04	2362.24	1282.72	1998.72		1114.48	1889.03	2632.98	1490.7	3048.02	2076.24
1088.63	1290.26	793.986	1260.82	1194.02	1745		758.06	2037.06	2056.72	2347.88	1268.5	1972.22		1106.34	1877.45	2607.93	1477.23	3015.69	2062.56
1076.79	1278.21	786.551	1250.09	1178.91	1719.45		753.43	2014.07	2040.75	2329.44	1256.39	1950.49		1100.09	1867.2	2581.42	1466.13	2985.47	2046.3
1070.25	1267.71	779.743	1243.74	1167.59	1698.31		747.926	1997.86	2020.15	2312.8	1239.07	1930.67		1094.42	1858.82	2560.75	1453.43	2951.62	2026.47
1060.95	1255.59	769.514	1237.36	1152.99	1680.92		742.457	1976.79	2002.61	2297.56	1224.7	1909.15		1087.36	1847.57	2539.73	1442.89	2920	2006.92
1054.87	1243.02	761.84	1229.71	1145.34	1664.02		740	1959.21	1986.19	2282	1213.06	1884.87		1082.77	1837.76	2522.57	1428.84	2899.78	1976.89
1047.57	1231.74	753.965	1224.18	1129.91	1647.21		734.661	1947.94	1969.89	2275.01	1201.86	1866.41		1075.64	1826.55	2499.5	1416.87	2867.52	1954.38
1041.01	1218.36	746.885	1216.74	1119.19	1627.56		730.693	1933.41	1960.32	2260.12	1193.76	1846.24		1072.44	1817.01	2482.73	1404.35	2846.7	1930.22
1032.24	1207.79	738.603	1211.35	1105.66	1613.35		724.264	1928.59	1944	2247.09	1182.78	1824.25		1067.39	1804.55	2462.96	1393.82	2822.46	1915.83
1025.73	1198.61	730.209	1200.43	1092.04	1595.78		719.41	1921.13	1931.15	2228.37	1171.71	1801.29		1061.73	1793.23	2443.53	1388.07	2805.89	1897.15
1021.04	1187.29	725.088	1196.5	1081.18	1580.17		715.364	1906.66	1920.39	2214.44	1162.91	1785.94		1055.84	1784.35	2427.49	1379.09	2790.19	1874.36
1015.67	1178.74	716.315	1188.31	1063.14	1567.05		709.923	1898.49	1903.03	2201.22	1149.73	1766.71		1044.62	1775.93	2411.22	1370.45	2765.31	1870.16
1011.23	1168.48	709.46	1182.75	1054.51	1551.8		705.572	1878.88	1893.05	2188.83	1142.19	1753.31		1041.37	1763.7	2404.16	1359.25	2749.71	1850.51
1001.36	1158.93	703.91	1177.65	1036.88	1535.89		698.42	1868.58	1876.94	2180.76	1132.72	1730.25		1033.82	1756.05	2394.91	1350.6	2727.45	1837.58
997.902	1149.25	698.374	1173.93	1025.57	1518.36		693.242	1847.26	1859.17	2169.08	1121.92	1714.3		1029.69	1746.28	2389.26	1338.62	2709.62	1819.75
991.383	1143.4	694.777	1172.04	1015.25	1502.92		687.86	1830.72	1846.14	2152.58	1115.36	1695.86		1026.33	1737.44	2374.09	1328.77	2685.37	1798.98
988.063	1141.33	688.007	1166.46	1004.08	1489.38		682.816	1823.13	1828.42	2134.49	1107.96	1675.91		1017.98	1728.7	2354.35	1323.72	2670.01	1788.07
984.687	1135.53	683.095	1161.08	996.436	1479.17		677.604	1804.41	1819.39	2122.27	1096.05	1655.91		1016.5	1719.07	2338.66	1317.73	2647.83	1766.1
977.84	1133.06	674.85	1155.1	985.551	1464.23		672.4	1796.72	1805.15	2107.05	1086.42	1636.64		1009.15	1711.21	2320.03	1310.59	2623.77	1750.46
973.696	1128.27	668.594	1152.2	982.141	1447.51		668.845	1779.65	1794.24	2098.78	1074.2	1623.94		1003.59	1701.52	2312.99	1299.1	2603.3	1725.16
965.795	1124.19	662.366	1145.05	971.844	1434.24		664.168	1774.66	1779.51	2085.41	1066.67	1603.94		996.362	1693.33	2300.38	1291	2576.84	1709.85
962.423	1117.32	657.292	1140.41	963.361	1421.54		659.476	1767.41	1766.4	2076.51	1061.27	1589.53		992.051	1685.75	2288.75	1283.16	2559.96	1693.69
959.037	1110.05	653.627	1136.32	958.625	1412.1		655.789	1763.69	1755.97	2064.34	1054.4	1574.72		986.971	1679.63	2279.61	1270.98	2542.97	1676.41
957.417	1101.74	648.882	1128.92	947.895	1404.63		652.177	1760.6	1745.08	2048.2	1046.52	1556.84		982.177	1670.57	2268.52	1265.65	2516.1	1660.93
959.44	1091.69	647.246	1126.22	943.212	1395.96		648.306	1749.87	1736.27	2039.78	1037.16	1546.24		981.089	1661.52	2259.03	1257.51	2501.1	1646.35
958.312	1082.6	643.839	1120.85	932.23	1383.42		645.87	1740.77	1724.46	2029.09	1027.9	1529.57		976.801	1653.85	2249.57	1252.23	2480.04	1636.9
957.966	1073.75	641.351	1115.59	922.629	1371.34		642.683	1725.9	1714.26	2022.86	1022.45	1513.39		972.688	1644.94	2241.91	1243.84	2464.9	1624.94
960.024	1065.04	635.784	1111.24	914.107	1354.83		637.633	1711.16	1702.17	2010.84	1016.51	1495.86		969.051	1636.08	2234.09	1237.4	2450.76	1609.05
955.683	1058.4	630.468	1104.73	901.438	1341.21		634.238	1708.11	1688.36	1996.49	1013.16	1476.66		964.023	1626.68	2228.66	1231.85	2430.78	1594.45
954.718	1046.56	626.116	1100.21	894.65	1326.1		630.358	1696.38	1682.64	1985.77	1008.76	1465.07		960.386	1619.75	2217.89	1222.49	2415.34	1578.42
949.411	1036.16	621.713	1093.05	885.156	1313.11		627.654	1690.15	1668.5	1968.67	1003.63	1447.08		955.193	1611.23	2206.88	1214.81	2392.18	1565.82
949.504	1027.04	616.123	1086.2	876.692	1300.51		624.383	1676.68	1661.04	1955.08	997.445	1431.44		950.852	1601.98	2193.64	1206.75	2372.68	1553.93
947.477	1019.93	609.233	1078.62	870.276	1287.41		621.731	1670.34	1651.47	1939.91	991.051	1415.94		945.452	1593.73	2176.59	1201.12	2353.91	1540.64
946.183	1012.63	604.992	1071.17	864.086	1274.88		619.055	1661.62	1642.05	1926.18	987.701	1400.24		938.838	1586.19	2164.7	1196.8	2333.97	1531.16
943.37	1008.17	603.296	1068.39	857.551	1263.57		615.622	1656.34	1632.52	1913.39	981.597	1387.49		934.508	1578.76	2155.25	1191.14	2322.07	1520.99
941.733	1001.77	599.302	1061.37	851.601	1251.97		614.866	1651.95	1621.11	1895.47	979.655	1369.16		928.069	1568.91	2148.75	1189.88	2305.1	1515.19
88517.9	105555	66542.2	105775	100473	146901		62655.6	171119	173701	199327	102866	168582		90048.4	156860	222513	125527	242259	177206
1	1.19247	0.751738	1.19496	1.13506	1.65957		0.707831	1.93316	1.96232	2.25183	1.1621	1.9045		1.01729	1.77207	2.51376	1.4181	2.73684	2.00193
D21							T21							Q21
0	2	4	8	24	48		0	2	4	8	24	48		0	2	4	8	24	48
1300.86	1808.19	1098.55	2417.19	1696.94	2896.77		1440.12	2976.52	2851.52	3132.79	4331.26	2594.91		1624.83	2999.41	4321.77	4903.91	4346.69	4627.04
1316.59	1827.28	1114.05	2425.73	1711.93	2897.52		1452.25	2986.08	2846.15	3116.65	4314.89	2585.37		1625.25	3012.63	4356.71	4942.6	4328.12	4627.37
1332.89	1837.98	1132.68	2449.98	1720.96	2902.73		1461.52	3002.12	2840.89	3123.1	4309.66	2592.86		1647.86	3014.01	4401.71	4973.15	4339.08	4635.07
1347.52	1852.33	1158.2	2479.55	1715.93	2907.27		1470.97	3038	2850.52	3152.41	4326.66	2595.29		1677.15	3031.19	4429.32	4997.49	4370.3	4656
1359.08	1861.29	1172.55	2494.59	1713.37	2899.14		1478.62	3068.61	2867.11	3199.54	4354.43	2604.04		1703.56	3034.08	4455.87	5028.86	4413.89	4684.25
1362.28	1858.32	1180.09	2486.89	1723.03	2893.92		1483.14	3093.3	2883.39	3237.69	4350.74	2609.82		1725.01	3036.69	4480.55	5038.32	4454.28	4712.39
1357.87	1851.79	1186.92	2466.94	1739.25	2872.12		1488.02	3098.82	2896.71	3251.73	4357.79	2609.37		1741.88	3021.54	4491.71	5033.91	4504.5	4712.98
1347.87	1837.02	1193.75	2431.98	1742.75	2843.98		1479.54	3087.53	2882.39	3240.95	4376.14	2601.42		1753.93	2999.38	4495.95	5005.08	4544.66	4693.54
1335.84	1819.96	1194.48	2398.14	1739.77	2795.83		1469.34	3048.81	2856.54	3214.45	4393.89	2570.43		1750.84	2968.16	4489.68	4953.95	4558.77	4628.5
1318.62	1798.67	1184.46	2361.14	1728.77	2754.44		1456.52	3010.54	2822.13	3182.13	4381.03	2539.24		1741.82	2922.38	4454.1	4905.09	4525.4	4562.6
1296.4	1782.89	1175.04	2327.28	1720.45	2715.9		1443.88	2967.32	2791.68	3148.13	4359.74	2502.03		1720.15	2877.82	4411.06	4852.97	4504.55	4491.11
1282.85	1775.52	1160.09	2284.49	1713.04	2667.2		1430.09	2923.94	2760.29	3099.14	4316.76	2465.5		1703.97	2829.22	4363.22	4791.84	4478.71	4409.32
1261.23	1759.27	1142.45	2229.66	1681.06	2617.2		1407.49	2874.78	2730.4	3051.83	4269.14	2419.25		1686.28	2791.19	4288.76	4709.95	4430.77	4314.5
1248.79	1745.41	1124.29	2191.37	1653.47	2570.04		1389.96	2825.41	2697.45	3008.92	4207.73	2377.89		1673.53	2749.25	4217.26	4641.43	4397.26	4225.3
1235.14	1727.47	1109.3	2154.54	1630.06	2518.64		1372.15	2780.49	2661.61	2965.8	4146.45	2340.58		1660.5	2713.43	4146.22	4564.93	4354.8	4142.76
1224.84	1707.13	1096.69	2126.26	1611.87	2469.61		1355.19	2744.11	2631.43	2924.39	4096.9	2302.5		1640.4	2671.7	4083.18	4490.41	4311.6	4062.31
1215.98	1687.13	1086.91	2094.95	1598.44	2424		1338.01	2709.36	2601.91	2884.02	4020.42	2264.58		1623.46	2632.83	4024.57	4425.37	4269.11	3975.34
1199.83	1665.94	1072.52	2062.43	1579.02	2376.16		1321.97	2675.41	2572.04	2845.2	3955.4	2223.49		1604.75	2599.79	3950.2	4361.49	4231.51	3892.91
1187.93	1649.32	1060.04	2036.86	1556.34	2329.6		1310.21	2638.37	2540.62	2808.94	3875.44	2182.1		1590.45	2558.32	3888.83	4286.37	4182.61	3811.57
1175.09	1626.08	1046.31	2015.08	1535.67	2291.64		1297.32	2607.54	2514.1	2787.45	3828.28	2151.95		1576.21	2523.83	3833.62	4232.18	4156.94	3734.97
1166.3	1607.08	1032.24	1988.14	1516.77	2256.82		1286.64	2572.15	2495.29	2769.86	3765.51	2125.32		1561.35	2489.94	3793.75	4178.75	4120.46	3669.18
1153.08	1585.96	1017.93	1960.84	1495.39	2222.41		1277.35	2543.26	2478.89	2750.48	3719.2	2098.11		1546.21	2455.85	3755.85	4132.22	4065.44	3604.37
1143.46	1569.48	1009.13	1937.54	1474.78	2194.7		1268.5	2516.74	2462.38	2721.8	3686.1	2074.24		1532.03	2430.08	3723.93	4075.39	4018.81	3550.3
1138.16	1556.57	1000.63	1913.17	1457.92	2159.86		1261.43	2494.2	2436.75	2685.89	3649.74	2045.19		1520.95	2396.57	3686.76	4019.05	3979.05	3489.01
1125.87	1540.55	990.813	1896.25	1437.63	2134.71		1253.54	2467.23	2411.67	2658.4	3626.66	2019.4		1504.18	2366.31	3647.13	3965.43	3941.51	3420.14
1120.63	1530.25	984.655	1874.16	1419.97	2101.11		1245.97	2439.37	2377.39	2627.23	3579.39	1987.86		1493.35	2333.99	3605.75	3925.81	3903.21	3367.08
1110.18	1512.61	978.33	1855.66	1406.66	2067.9		1237.04	2415.09	2352.91	2604.41	3540.79	1959.97		1479.7	2306.26	3560.06	3891.73	3877.57	3314.05
1105.28	1494.8	973.873	1844.5	1396.3	2039.08		1226.87	2387.16	2336.4	2580.76	3506.87	1935.83		1466.74	2280.99	3518.84	3849.74	3848.02	3273.23
1101.82	1482.07	969.402	1833.57	1380.65	2008.34		1218.29	2356.72	2320.81	2557.68	3468.67	1907.23		1459.41	2251.43	3481.89	3795.5	3826.33	3230.63
1092.54	1465.13	964.061	1820.11	1363.32	1978.64		1211.53	2328.34	2303.06	2549.39	3440.33	1886.34		1448.9	2231.4	3446.37	3746.33	3800.81	3195.44
1084.96	1451.67	956.916	1807.29	1340.06	1954.95		1206.46	2301.74	2279.27	2530.91	3405.33	1859.18		1441.73	2205.73	3411.78	3694.34	3784.86	3165.75
1076.75	1437.05	949.08	1792.96	1317.82	1924.63		1199.14	2280.84	2258.35	2511.21	3382.09	1837.44		1434.71	2190.62	3368.6	3649.69	3764.44	3132.26
1070.76	1431.8	939.676	1777.01	1306.11	1907.14		1192.73	2250.49	2241.45	2481.35	3350.65	1815.26		1421.43	2164.61	3338.11	3604.5	3756.86	3101.77
1067.37	1423.02	927.542	1765.26	1293	1887.04		1186.88	2224.05	2224.89	2459.37	3316.54	1791.74		1408.74	2145.51	3304.23	3546.85	3737.86	3060.96
1059.96	1414.66	919.968	1749.66	1278.03	1867.98		1179.33	2202.49	2210.57	2439.39	3287.43	1772.82		1399.26	2121.85	3262.12	3514.29	3722.57	3030.01
1050.66	1408.76	910.184	1736.83	1260.94	1847.94		1170.29	2174.83	2197.33	2410.19	3261.5	1747.52		1384.63	2096.43	3229.02	3476.81	3713.1	2998.07
1036.33	1397.97	900.487	1727.25	1241.21	1822.28		1162.75	2163.95	2183.52	2400.33	3243.3	1727.85		1376.78	2082.26	3196.35	3439.5	3706.04	2968.53
1026.6	1391.88	890.646	1718.3	1230.2	1804.47		1155.62	2144.69	2170.88	2376.94	3220.4	1702.78		1367.69	2061.75	3168.84	3408.56	3703.45	2937.73
1016.43	1384.17	880.554	1703.99	1219.27	1780.78		1149.58	2125.25	2156.03	2356.28	3204.8	1685.5		1360.94	2043.76	3131.68	3376.08	3695.89	2906.52
1008.26	1372.37	873.729	1689.57	1210.98	1760.06		1141.13	2115.29	2135.83	2343.57	3185.59	1668.08		1359.62	2029.81	3102.2	3348.25	3679.3	2872.91
1003.57	1362.1	867.689	1673.71	1201.29	1744.27		1133.98	2098.31	2122.62	2311.98	3154.2	1653.86		1350.47	2009.55	3078.08	3326.38	3654.62	2848.22
997.845	1348.14	862.542	1661.01	1195.07	1721.09		1126.33	2090.11	2107.73	2300.52	3124.55	1635.11		1342.78	1989.33	3047.66	3287.96	3627.69	2813.39
991.605	1337.18	856.361	1646.02	1183.64	1698.02		1120.23	2070.37	2086.88	2273.96	3089.2	1622.04		1330.77	1971.89	3026.46	3255.68	3601.02	2782.36
982.722	1327.91	849.366	1632.22	1173.5	1673.93		1112.38	2055.35	2068.58	2259.37	3061.63	1605.96		1325.06	1958.44	2999.39	3218.69	3581.78	2750.84
975.229	1321.24	844.592	1624.5	1161.22	1654		1105.13	2036.75	2053.04	2238.62	3030.68	1593.89		1318.59	1947.21	2975.21	3191.82	3564.71	2725.21
968.745	1314.5	841.365	1618.54	1150.54	1634.89		1098.66	2015.57	2038.71	2217.56	3001.23	1577.24		1307.45	1933.49	2949.17	3161.07	3551.32	2699.84
960.258	1306.29	836.358	1612.09	1138.11	1614.73		1091.71	1996.89	2024.24	2208.79	2979.28	1563.09		1299.98	1918.12	2920.77	3138.77	3544.02	2678.19
951.979	1295.69	829.187	1605.71	1122.06	1599.92		1084.95	1970.22	2014.5	2182.2	2948.52	1549.08		1293.72	1902.78	2892.79	3109.88	3516.59	2655.69
943.51	1288.79	822.818	1595.21	1112.6	1585.81		1077.35	1955.71	2009.87	2173.85	2932.38	1535.34		1287.79	1883.94	2857.64	3081.08	3501.29	2631.04
939.08	1282.8	815.746	1585.85	1103.26	1569.5		1070.19	1936.09	2001.69	2151.83	2910.26	1522.22		1279.26	1868.18	2829.08	3056.02	3477.18	2610.02
930.184	1278.07	808.408	1573.22	1095.08	1556.18		1062.84	1921.61	1987.75	2132.43	2889.38	1508.71		1267.12	1851.47	2791.65	3029.54	3463.23	2586.19
926.887	1266.49	802.042	1560.63	1083.5	1543.59		1056.22	1907.75	1973.41	2124.53	2884.22	1497.32		1261.83	1840.4	2765.65	3005.59	3452.64	2557.87
923.789	1257.16	794.745	1552.45	1067.35	1530.09		1049.86	1884.44	1958.78	2097.75	2851.09	1485.02		1249.3	1825.73	2740.89	2984.88	3437.06	2536.73
919.443	1246.89	788.86	1534.81	1058.26	1513.35		1045.19	1874.56	1945.1	2089.29	2844.47	1472.11		1242.88	1810.49	2715.37	2950.71	3427.49	2509.23
918.743	1235.31	784.529	1525.7	1045.16	1494.55		1039.52	1857.39	1936.58	2062.88	2814.77	1456.42		1236.06	1798.2	2685.78	2926.86	3408.56	2493.61
911.382	1222.14	778.653	1516.29	1037.57	1479.19		1034.51	1845.09	1931.3	2054.34	2800.85	1443.19		1228.79	1778.46	2662.99	2899.84	3391.77	2470.8
906.564	1210.35	773.42	1509.48	1031.38	1466.1		1029.05	1831.06	1921.61	2044.5	2791.74	1430		1221.74	1764.39	2641.72	2883.33	3373.25	2447.14
900.783	1199.86	765.24	1504.83	1023.04	1447.99		1025.6	1809.32	1913.79	2021.53	2763.51	1419.22		1213.87	1755.28	2622.07	2870.24	3348.12	2426.18
894.393	1192.15	758.186	1496.95	1014.26	1431.83		1019.61	1795.42	1901.14	2009.04	2759.44	1406.7		1207.01	1744.94	2595.56	2854.1	3326.96	2400.05
888.639	1180.25	753.141	1486.58	1004.09	1417.26		1014.9	1776.23	1891.07	1987.39	2736.28	1393.83		1200.67	1738.05	2577.21	2836.14	3306.28	2380.55
881.929	1171.87	745.939	1481.26	995.839	1399.39		1008.13	1764.31	1879.01	1983.41	2719.34	1378.32		1197.96	1724.84	2552.51	2811.65	3296.6	2352.66
876.865	1164.39	739.374	1470.22	986.415	1378.29		1002.03	1743.53	1871.64	1961.46	2691	1363.82		1192.33	1716	2531.72	2789.2	3274.59	2336.97
870.459	1157.75	733.776	1461.13	979.475	1361.54		998.379	1729.26	1865.93	1948.21	2667.08	1347.64		1182.46	1704.21	2510.08	2766.19	3258.61	2319.3
863.164	1149.76	728.046	1452.11	971.582	1345.2		993.744	1717.55	1859.89	1938.84	2655.26	1333.14		1175.97	1692.67	2485.75	2748.77	3245.04	2299.93
858.526	1143.09	725.196	1440.7	965.423	1328.9		991.226	1701.51	1856.33	1918.76	2640.72	1317.99		1167.11	1683.32	2463.21	2731.85	3227.05	2288.21
853.239	1137.29	719.463	1433.02	953.798	1313.52		988.031	1691.93	1850.79	1911.88	2624.57	1306.3		1157.89	1670.03	2442.85	2711.3	3219.5	2261.55
849.834	1131.19	714.541	1424.6	945.894	1299.25		985.154	1674.08	1843.36	1894.34	2598.94	1295.55		1151.58	1662.61	2424.88	2691.62	3206.04	2245.84
847.233	1126.38	709.559	1417.08	933.324	1285.71		982.498	1661.93	1836.12	1884.19	2577.64	1286.89		1145.69	1651.45	2406.45	2669.79	3189.28	2221.7
843.105	1117.59	703.01	1406.57	924.788	1273.91		978.241	1651.29	1829.26	1878.68	2563.82	1279.7		1139.86	1642.76	2385.1	2646.2	3181.79	2202.87
837.256	1111.01	699.638	1397.13	917.678	1262.05		974.629	1635.06	1822.52	1864.61	2533.6	1275.11		1135.92	1637.52	2370.51	2630.3	3162.39	2194.34
833.584	1101.54	691.321	1385.47	908.712	1252.98		969.523	1625.37	1814.07	1866.38	2526.6	1268.01		1130.44	1621.44	2346.25	2608.93	3152.3	2173.41
828.152	1092.3	685.077	1378.37	903.208	1243.34		966.711	1611.8	1804.39	1848.76	2502.16	1258.77		1124.91	1611.68	2329.94	2593.28	3126.19	2162.67
822.42	1083.33	676.999	1368.76	891.337	1231.19		963.33	1605.18	1794.68	1848	2486.78	1248.52		1119.17	1598.51	2310.8	2569.69	3109.84	2145.86
818.288	1073.07	670.08	1361.19	884.1	1217.25		958.778	1595.61	1788.57	1835.74	2463.77	1241.11		1110.62	1590.29	2295.08	2555.38	3092.95	2135.87
814.329	1068.09	664.22	1353.31	873.323	1202.23		956.915	1588.89	1782.95	1831.07	2449.76	1231.54		1106.79	1582.12	2282.78	2538.35	3077.63	2125.26
813.129	1061.11	658.419	1344.75	864.301	1187.07		953.455	1585.51	1774.72	1822.53	2438.66	1221.45		1101.53	1576.57	2270.44	2520.72	3064.34	2109.66
806.333	1056.97	655.356	1334.01	857.665	1172.73		950.551	1570.17	1763.96	1807.7	2414.15	1211		1099.24	1572.55	2255.57	2503.04	3036.46	2096.24
80616.1	109357	69912.5	137753	98317	146495		90596.9	171542	172059	187178	255335	139016		107345	166901	251357	275933	287825	241563
1	1.35651	0.867227	1.70875	1.21957	1.8172		1.12381	2.12789	2.1343	2.32184	3.1673	1.72441		1.33156	2.07032	3.11795	3.4228	3.57032	2.99647
D21							T21							Q21
0	2	4	8	24	48		0	2	4	8	24	48		0	2	4	8	24	48
872.891	1964.12	1150.55	2237.1	2013.04	2223.41		1300.49	3588.28	3110.82	4335.62	2944.22	1726.31		1817.98	4088.01	4044.54	3974.56	2961.12	2740.57
850.832	1970.49	1169.34	2249.12	2024.01	2272.33		1303.39	3623.22	3143.55	4328.93	2923.07	1732.49		1835.11	4128.43	4123.33	4015.92	2976.3	2754.68
839.916	1994.16	1185.61	2274.39	2042.45	2320.02		1317.35	3667.75	3198.56	4310.25	2925.46	1747.64		1851.84	4156.83	4177.23	4062.91	2959.36	2767.55
839.142	2025.72	1205.45	2307.4	2087.75	2356.95		1323.97	3722.88	3263.32	4327.34	2952.16	1766.65		1887.8	4199.58	4227.05	4126.29	2979.1	2773.82
848.875	2052.95	1220.86	2336.41	2114.52	2400.6		1333.69	3768.15	3319.4	4339.73	2966.23	1796.37		1919.05	4221.71	4266.07	4171.61	3001.9	2783.71
852.926	2062.47	1240.13	2350.85	2127.1	2428.72		1341.77	3795.48	3358.12	4332.68	2968.66	1831.7		1947.35	4238.54	4300.7	4195.62	3020.25	2808.08
852.146	2069.6	1254.27	2351.19	2139.05	2453.79		1344.27	3791.65	3376.66	4327.64	2989.83	1869.11		1975.13	4245.69	4323.59	4207.44	3051.65	2834.36
854.204	2056.98	1264.98	2341.36	2134.73	2465.08		1342.07	3779.87	3383.18	4311.71	3000.79	1882.91		1999.71	4246.23	4310.79	4192.53	3080.56	2856.44
857.204	2039.37	1267.63	2315.47	2123.35	2458.32		1337.46	3732.98	3345.24	4289.62	3006.03	1873.78		1991.52	4214.37	4252.51	4147.49	3110.16	2857.49
851.601	2027.75	1255.66	2293.26	2103.17	2442.74		1327.16	3673.3	3301.6	4229.78	2980.78	1867.29		1988.68	4174.28	4189.02	4082.83	3091.8	2856.35
847.398	2007.23	1241.87	2265.77	2083.49	2434.79		1312.74	3621.68	3254.5	4172.19	2954.06	1854.24		1973.11	4113.94	4131.38	4019.45	3075.63	2847.1
845.089	1989.79	1223.35	2230.82	2062.95	2403.83		1302.47	3560.26	3204.77	4130.24	2926.96	1844.62		1956.86	4018.47	4057.94	3943.01	3049.32	2839.46
839.114	1956.93	1204.05	2193.3	2034.44	2375.6		1277.5	3491.66	3148.37	4066.8	2873.33	1824.23		1948.39	3937.23	4001.09	3860.58	3001.41	2814.11
834.956	1920.28	1190.24	2164.55	2008.97	2327.59		1264.13	3435.42	3088.35	4015.6	2831.93	1806.83		1931.9	3830.41	3929.1	3791.76	2965.61	2782.71
828.068	1885.08	1179.66	2132.35	1983.41	2285.78		1247.69	3378.24	3030.29	3957.26	2787.41	1784.94		1912.43	3744.95	3870.59	3725.2	2921.55	2758.74
823.22	1858.75	1170.79	2100.87	1957.24	2256.81		1236.13	3323.95	2979.73	3895.44	2754.49	1755.3		1895.57	3674.83	3832.73	3655.44	2871.22	2734.8
817.791	1837.78	1158.68	2065.7	1933.23	2226.61		1222.85	3270.85	2932.34	3837.31	2721.18	1727.13		1877.05	3608.9	3788.67	3587.56	2823.66	2710.73
813.392	1813.86	1144.67	2026.96	1903.14	2208.4		1204.45	3221.7	2886.49	3777.32	2678.89	1695.99		1852.86	3543.85	3736.72	3518.86	2778	2673.03
805.484	1794.14	1136.72	1992.66	1881.21	2185.91		1189.13	3182.11	2834.6	3714.61	2641.91	1673.9		1831.91	3477.13	3672.62	3454.7	2741.85	2644.78
802.295	1777.18	1122.63	1962.25	1860.36	2159.83		1172.82	3142.48	2807.86	3667.31	2596.09	1655.83		1813.85	3421.75	3625.79	3403.7	2707.01	2617.51
797.162	1759	1108.3	1937.54	1834.3	2123.75		1164.85	3102.88	2775.25	3633.8	2566.99	1629.97		1792.3	3362.9	3575.12	3358.71	2681.07	2593.78
789.936	1743.56	1094.58	1918.26	1815.67	2087.62		1152.27	3063.46	2737.25	3612.55	2534.48	1607.73		1774.76	3309.52	3534.66	3311.64	2649	2566.38
783.132	1727.3	1083.06	1901.61	1790.32	2053.79		1140.35	3027.28	2698.59	3589.64	2508.13	1586.42		1754.94	3258.12	3494.72	3271.61	2619.76	2543.58
777.385	1713.49	1076.44	1884.58	1769.4	2023.87		1126.64	2989.55	2661.73	3562.63	2496.46	1574.25		1731.45	3208.51	3454.8	3238.38	2594.88	2516.98
769.811	1693.65	1067.74	1864.71	1741.62	2001.06		1111.87	2955.56	2625.18	3533.71	2473.37	1561.74		1712.05	3158.53	3418.18	3206.34	2565.13	2481.32
763.59	1676.84	1062.73	1845.54	1722	1981.41		1098.16	2912.19	2592.64	3499.07	2461.9	1554.82		1692.33	3115.07	3375.52	3170.63	2548.72	2457.76
755.938	1668.64	1052.03	1821.9	1702.02	1960.01		1088.6	2874.97	2564.37	3478.37	2443.4	1547.24		1672.23	3077.44	3338.81	3136.03	2532.52	2435.22
749.937	1660.41	1042.63	1797.66	1678.28	1930.63		1079.76	2841.22	2539.99	3446.05	2421.75	1538.07		1655.48	3046.96	3312.79	3104.55	2510.64	2405.15
738.185	1646.81	1041.38	1770.16	1665.26	1903.34		1068.99	2806.08	2519.08	3411.21	2409.69	1530.35		1637.66	3017.1	3276.67	3071.34	2494.19	2384.44
729.7	1638.22	1028.99	1749.93	1639.57	1878.93		1057.84	2775.29	2494.85	3377.86	2387.56	1519.87		1622.06	2996.94	3254.73	3035.81	2474.96	2361.74
724.174	1622.43	1025.37	1726.55	1629.41	1844.99		1049.24	2739.34	2466.93	3347.77	2368.85	1511.26		1607.54	2976.12	3221.52	3005.2	2458.29	2346.24
716.048	1611.23	1016.27	1707.54	1613.32	1820.38		1041.07	2706.01	2441.31	3328.87	2336.28	1503.78		1596.31	2962.93	3194.72	2978.68	2436.36	2327.27
709.463	1596.64	1012.61	1691.91	1586.76	1795.07		1033.17	2678.8	2418.97	3303.66	2308.14	1492.77		1580.26	2938.37	3152.62	2956.12	2411.16	2307.92
701.548	1585.15	1003.27	1676.83	1563.21	1771.44		1022.28	2653.44	2403.83	3273.75	2282.81	1475.49		1572.24	2908.02	3118.39	2928.47	2382.7	2286.21
695.756	1574.94	995.092	1666.89	1546.32	1751.79		1015.8	2635.55	2385.5	3252.33	2266.9	1462.89		1561.92	2885.93	3086.47	2901.46	2364.43	2264.43
690.541	1563.21	990.49	1653.8	1531.8	1728.23		1004.94	2615.85	2366.57	3224.21	2254.97	1455.81		1550.04	2847.98	3059.29	2883	2347.7	2250.63
685.027	1557.48	984.192	1638.25	1525.18	1704.7		997.383	2595.94	2337.68	3194.5	2240.51	1443.8		1540.61	2828.38	3037.88	2857.41	2335.05	2223.79
680.08	1547.7	980.492	1622.6	1513.82	1684.7		985.272	2567.3	2315.81	3160.33	2219.43	1430.74		1532.51	2792.99	3006	2832.64	2311.9	2202.7
674.609	1539.25	973.022	1606.92	1502.91	1668.05		974.772	2543.98	2285.63	3125.44	2200.49	1410.47		1523.9	2768.17	2981.88	2802.65	2293.6	2176.04
668.76	1532.68	967.494	1599.39	1487.62	1655.36		966.754	2530.27	2256.46	3103.29	2188.5	1391.82		1515.82	2745.27	2958.05	2772.56	2279.09	2158.93
666.365	1519.85	961.367	1583.01	1473.16	1653.47		957.215	2507.08	2231.85	3079.29	2165.66	1375.06		1504.75	2721.93	2937.84	2742.41	2248.99	2146.34
659.128	1517.45	952.73	1567.05	1451.81	1643.7		952.074	2492.99	2214.33	3059.07	2151.22	1361.93		1497.21	2702.84	2920	2716.87	2228.88	2137.93
656.652	1509	942.668	1546.47	1438.28	1636.63		946.589	2469.89	2193.32	3040.92	2129.1	1347.59		1488.62	2683.71	2901.27	2692.54	2209.26	2134.7
650.325	1501.76	932.919	1528.66	1419.47	1617.11		940.151	2454.35	2176.74	3018.72	2118.89	1334.32		1483.5	2671.33	2885.18	2672.23	2197.06	2125
644.62	1490.21	923.086	1515.8	1406.81	1602.98		933.129	2438.18	2157.99	3007.2	2108.8	1323.14		1472.43	2659.51	2869.58	2654.83	2180.33	2115.5
639.209	1474.63	913.719	1501.29	1392.36	1593.13		927.737	2423.07	2138.4	2995.3	2092.31	1308.39		1465.85	2651.07	2855.56	2637.06	2161.17	2101.72
635.739	1464.55	901.378	1490.22	1375.04	1578.78		922.659	2407.29	2115.15	2976.33	2087.65	1295.54		1457.46	2639.83	2845.05	2622.26	2152.41	2083.75
633.858	1451.2	889.102	1475.41	1362.13	1567.52		915.718	2389.31	2091.9	2966.92	2069.86	1281.1		1449.36	2619.54	2826.1	2602.72	2132.7	2074.8
633.026	1441.05	875.401	1467.78	1347.59	1545.46		912.608	2376.24	2071.11	2938.75	2066.11	1265.64		1441.15	2601.15	2807.54	2583.55	2124.44	2061.97
629.219	1431.42	865.942	1453.54	1338.94	1525.41		906.356	2358.11	2049.25	2920.92	2053.57	1256		1434.43	2575.87	2788.82	2563.68	2109.77	2054.55
627.308	1422.86	854.651	1439.48	1329.03	1504.95		901.996	2347.43	2033.98	2893.57	2040.04	1251.88		1427.31	2563.45	2773.14	2554	2094.53	2042.47
625.132	1416.43	845.572	1431.66	1317.18	1487.12		895.427	2335.93	2011.68	2882.32	2027.35	1242.87		1425.17	2548.13	2759.86	2540.06	2080.7	2032.01
621.575	1405.01	839.356	1413.86	1307.47	1477.57		888.284	2324.2	1997.67	2867.47	2000.23	1234.47		1418.63	2532.29	2743.24	2520.25	2053.68	2024.7
617.708	1397.14	831.283	1406.6	1291.62	1462.89		886.545	2308.32	1977.17	2849.75	1985.27	1223.46		1412.06	2517.22	2732.12	2506.71	2042.83	2010.89
613.325	1383.77	824.467	1390.21	1280.64	1447.39		879.164	2286.03	1965.8	2831.41	1958.55	1211.49		1403.2	2499.51	2717.17	2485.85	2022.31	2008.08
610.057	1372.11	817.397	1383.78	1268.71	1437.51		874.037	2266.48	1943.45	2812.88	1946.21	1198.01		1392.07	2488.46	2703.36	2475.06	2018.41	1995
607.055	1361.58	807.751	1377.83	1256.44	1424.91		866.564	2251	1926.88	2794.49	1932.49	1186.92		1383.87	2468.7	2689.99	2462	2011.39	1980.49
605.746	1346.09	800.988	1368.33	1246.86	1412.5		857.689	2239.34	1916.49	2773.35	1922.81	1177.83		1376.74	2449.68	2669.74	2442.25	1998.77	1967.17
602.945	1340.91	792.959	1359.57	1233.99	1404.89		852.608	2229.69	1897.83	2751.65	1916.7	1170.01		1370.84	2428.25	2651.38	2434.51	1990.32	1947.65
602.166	1326.67	786.258	1346.45	1223.52	1395.16		844.504	2219.92	1891.71	2733.37	1902.89	1162.52		1361.95	2411.18	2636.81	2416.26	1970.25	1931.13
597.026	1321.62	779.581	1340.11	1211.34	1383.74		839.762	2204.88	1873.91	2716.76	1890.41	1153.24		1354.53	2394.69	2624.11	2407.24	1961.23	1909.55
592.513	1308.71	776.243	1327.27	1201.87	1376.57		832.383	2193.62	1867.39	2701.06	1875.2	1145.73		1346.52	2380.44	2612.47	2390.88	1943.69	1892.88
586.503	1301.3	773.083	1317.47	1190.96	1365.65		825.389	2177.58	1853.83	2690.27	1858.31	1135.61		1335.97	2371.16	2595.35	2377.98	1932.03	1877.64
580.773	1295.75	768.306	1310.25	1186.38	1353.43		818.787	2162.72	1832.06	2675.23	1850.63	1123.18		1327.64	2359.6	2578.68	2363.47	1923.55	1862.64
576.925	1282.95	763.202	1297.82	1176.79	1346.14		810.883	2149.05	1820.97	2651.86	1832.77	1115.52		1317.79	2349.27	2555.95	2342.68	1904.65	1846.4
572.538	1279.03	760.209	1291.27	1170.63	1332.31		805.293	2133.14	1798.29	2630.48	1822.97	1105.05		1312.1	2340.96	2543.88	2332.9	1892.5	1835.89
565.8	1268.78	758.622	1279.12	1159.9	1329.43		798.621	2120.12	1786.91	2616.97	1804.8	1098.51		1302.86	2329.97	2522.17	2318.9	1878.82	1823.06
559.766	1263.84	755.105	1270.64	1150.69	1315.42		793.304	2100.06	1770.31	2604.56	1792.11	1089.02		1297.14	2326.35	2513.55	2312.25	1866.86	1808.9
554.165	1257.92	753.231	1262.94	1141.17	1301.85		788.377	2085.18	1756.1	2587.28	1780.3	1078.38		1293.34	2321.02	2506.25	2304.9	1855.02	1798.42
548.595	1248.01	749.249	1248.15	1134.89	1291.54		781.569	2071.25	1753.63	2572.09	1762.67	1073.86		1289.34	2307.86	2497.06	2290.1	1838.42	1781.59
545.558	1243.83	745.643	1243.76	1122.1	1278.53		777.821	2051.66	1733.49	2558.86	1757.07	1062.66		1286.87	2292.99	2487.74	2289.12	1829.5	1771.72
540.401	1234.76	742.121	1234.34	1113.06	1269.22		771.434	2039.72	1724.14	2542.01	1750.44	1054.73		1281.39	2277.23	2474.88	2275.37	1819.79	1757.49
535.755	1229.91	737.382	1230.39	1105.64	1256.86		765.471	2020.52	1706.22	2523.46	1744.84	1042.42		1276.04	2267.37	2463.05	2261.99	1810	1744.96
532.612	1224.72	731.814	1222.44	1096.78	1249.58		761.319	2005.15	1695.16	2508.68	1734.92	1031.38		1267.48	2257.37	2450.22	2249.37	1795.76	1735.13
530.006	1220.66	725.06	1214.06	1087.65	1236.65		759.102	1993.86	1681.73	2492.37	1718.99	1021.46		1261.53	2245.91	2436.62	2233.03	1783.9	1723.1
527.339	1218.26	720.755	1207.6	1077.39	1230.24		753.068	1984.94	1666.69	2484.87	1705.81	1016.14		1256.71	2235.14	2420.01	2224.45	1771.86	1711.91
524.508	1208.38	711.177	1196.2	1072.44	1209.07		749.032	1976.96	1656.97	2467.81	1690	1010.49		1253.78	2218.95	2413.5	2206.12	1754.57	1697.79
53429.3	121745	74703.1	129815	119637	136602		78374.2	208982	183836	252045	175842	109512		121562	230200	244123	229467	182049	174301
1	2.27863	1.39817	2.42966	2.23917	2.55668		1.46688	3.91138	3.44073	4.71735	3.29112	2.04967		2.2752	4.30851	4.5691	4.29477	3.40729	3.26228

## Sheet: Figure 1-source data E and F
0HR	D21	T21	Q21			0HR	D21	T21	Q21			0HR	D21	T21	Q21
ciliated	10	10	4			ciliated	13	10	6			ciliated	6	12	3
total	32	45	35			total	42	50	57			total	30	70	32
	0.3125	0.222222	0.114286				0.309524	0.2	0.105263				0.2	0.171429	0.09375
2HR	D21	T21	Q21			2HR	D21	T21	Q21			2HR	D21	T21	Q21
ciliated	18	8	8			ciliated	10	11	4			ciliated	16	6	4
total	44	49	43			total	31	48	34			total	56	40	43
	0.409091	0.163265	0.186047				0.322581	0.229167	0.117647				0.285714	0.15	0.0930233
4HR	D21	T21	Q21			4HR	D21	T21	Q21			4HR	D21	T21	Q21
ciliated	18	9	10			ciliated	13	14	12			ciliated	16	10	8
total	42	42	42			total	37	54	64			total	48	38	54
	0.428571	0.214286	0.238095				0.351351	0.259259	0.1875				0.333333	0.263158	0.148148
8HR	D21	T21	Q21			8HR	D21	T21	Q21			8HR	D21	T21	Q21
ciliated	25	12	7			ciliated	32	17	10			ciliated	22	12	10
total	46	43	36			total	60	44	58			total	50	41	52
	0.543478	0.27907	0.194444				0.533333	0.386364	0.172414				0.44	0.292683	0.192308
24HR	D21	T21	Q21			24HR	D21	T21	Q21			24HR	D21	T21	Q21
ciliated	24	17	11			ciliated	24	30	8			ciliated	37	16	12
total	38	43	48			total	37	67	36			total	73	39	63
	0.631579	0.395349	0.229167				0.648649	0.447761	0.222222				0.506849	0.410256	0.190476
48HR	D21	T21	Q21			48HR	D21	T21	Q21			48HR	D21	T21	Q21
ciliated	32	20	16			ciliated	31	18	28			ciliated	37	34	23
total	40	36	46			total	40	36	64			total	50	56	71
	0.8	0.555556	0.347826				0.775	0.5	0.4375				0.74	0.607143	0.323944
	0HR				2HR				4HR				8HR				24HR				48HR
	D21	T21	Q21		D21	T21	Q21		D21	T21	Q21		D21	T21	Q21		D21	T21	Q21		D21	T21	Q21
Fractions	0.3125	0.222222	0.114286		0.409091	0.163265	0.186047		0.428571	0.214286	0.238095		0.543478	0.27907	0.194444		0.631579	0.395349	0.229167		0.8	0.555556	0.347826
	0.309524	0.2	0.105263		0.322581	0.229167	0.117647		0.351351	0.259259	0.1875		0.533333	0.386364	0.172414		0.648649	0.447761	0.222222		0.775	0.5	0.4375
	0.2	0.171429	0.09375		0.285714	0.15	0.0930233		0.333333	0.263158	0.148148		0.44	0.292683	0.192308		0.506849	0.410256	0.190476		0.74	0.607143	0.323944
Percents	31.25	22.2222	11.4286		40.9091	16.3265	18.6047		42.8571	21.4286	23.8095		54.3478	27.907	19.4444		63.1579	39.5349	22.9167		80	55.5556	34.7826
	30.9524	20	10.5263		32.2581	22.9167	11.7647		35.1351	25.9259	18.75		53.3333	38.6364	17.2414		64.8649	44.7761	22.2222		77.5	50	43.75
	20	17.1429	9.375		28.5714	15	9.30233		33.3333	26.3158	14.8148		44	29.2683	19.2308		50.6849	41.0256	19.0476		74	60.7143	32.3944
	Rate 0-8h				Rate 8-48h
	2.88723	0.710594	1.00198		0.641304	0.691214	0.383454
	2.79762	2.32955	0.839383		0.604167	0.284091	0.662716
	3	1.51568	1.23197		0.75	0.78615	0.32909
	2.89495	1.51861	1.02445		0.665157	0.587152	0.45842

## Sheet: Fig 1 supp-source data 1A-C
D21							T21							Q21
0	2	4	8	24	48		0	2	4	8	24	48		0	2	4	8	24	48
0.851222	1.23355	0.966726	1.18494	1.05672	0.777499		1.02926	1.03435	1.39348	1.14638	0.916914	1.00424		1.00921	1.09032	0.92747	1.07095	1.1122	1.39058
0.855146	1.03259	1.16656	1.30178	0.978397	0.75375		0.951493	1.0339	1.18424	0.970038	0.977358	0.884475		0.8964	1.35757	0.910856	1.21948	1.15115	1.34483
0.723175	0.917814	0.921798	1.33244	1.05842	0.810437		0.819165	0.960618	1.08769	1.23732	0.949609	0.98144		0.890512	1.03711	1.28862	1.45905	0.966182	1.41219
0.913875	0.882956	0.829735	0.978031	0.975475	1.01293		1.43284	1.2615	1.11481	0.95216	1.04683	0.983716		0.876096	1.1764	0.869745	1.34205	1.13117	1.2763
0.895084	1.13883	0.808914	0.918028	0.922531	0.949855		1.0148	0.87009	1.27838	0.883749	0.922115	0.780838		0.902005	1.23916	0.881963	1.1772	0.982695	1.03042
0.995069	1.46877	0.905938	0.855256	0.905173	0.831812		1.21721	1.11634	0.813101	0.875781	1.04626	0.787883		1.02621	1.02445	0.985134	1.21049	0.933539	1.05006
1.08949	1.19064	0.920865	0.946143	0.935539	0.851849		0.820538	1.22814	1.07004	1.27004	1.01676	0.874663		0.962149	1.25852	0.892488	1.01276	0.926925	0.981545
1.21125	1.13644	1.24579	0.858664	0.912886			0.865165	1.18504	0.905022	0.946528	1.02667	0.739646		1.09464	1.34901	1.39348	1.22527	1.00157	1.03897
0.866356	1.17235	0.929335	0.792652	0.876373			0.96992	1.09063	1.01035	1.1254	0.877253	0.711682		1.19601	1.28449	1.18424	1.2535	1.10796	1.02665
1.09063	0.896683	0.934192	0.935722	1.32862			0.870012	0.952847	1.17103	1.24239	0.95004	0.956831		0.879967	1.28445	1.08769	1.24348	0.976283	0.945112
1.03724	0.90422	1.20917	1.0591	0.820599			1.1098	1.05093	0.935499	0.867107	0.965583	0.936029		1.04895	1.54385	1.11481	0.985336	1.1594	1.17738
0.831808	0.960684	0.974811	1.10006	0.849293			1.37683	1.15561	0.862947	0.908613	0.994254	0.914677		0.910896	1.05473	1.27838	0.884	1.33441	1.11095
1.13487	0.93822	1.14979	1.11979	0.910269			0.904021	1.35874	1.01606	1.36767	1.0169	1.02185		0.934224	1.10952	0.813101	1.02473	0.88025	1.01977
1.06135	0.964135	0.949163	1.01611	0.848471			0.892953	1.13749	1.44024	1.2427	1.22494	1.17941		1.3284	1.06411	1.07004	0.928942	1.02512	1.32179
0.85214	0.93785	0.949178	0.996881	1.01611			0.866715	1.18102	1.17034	1.67538	1.00781	0.805958		1.11881	0.962593	0.905022	1.0651	1.07365	1.0207
0.996061	0.897497	1.24006	1.0054	1.07936			0.905061	1.11461	1.04628	1.17027	1.0607	0.873564		0.864765	1.01804	1.01035	1.06578	0.920171	1.11393
0.794669	1.05672	1.12343	1.32182	0.867853			0.992449	1.13851	1.00554	1.01052	1.03405	1.04899		0.905715	1.30995	1.17103	1.46294	0.931946	1.03508
1.02594	0.941581	0.819769	0.890111	0.840195			0.961756	1.08928	1.18844	1.02775	1.31123	0.84711		0.996425	0.892226	0.935499	1.21484	1.30842	1.00332
0.950022	0.951858	1.09236		0.962072				1.09348	1.18618	1.18281	1.11746	0.956124		1.1023	0.893899	0.862947	0.923014	1.28884	1.02068
1.04927	0.95134	0.958137		1.00843				1.56866	0.774048	1.24117	0.964209	1.00057		1.05633	0.974146	1.01606	1.04419	0.991707	1.23565
1.09831	0.830283	0.824137		0.894736				1.21799	0.90563	1.00257	1.19764	0.972393			0.912368	1.44024		1.02461
1.51004	0.89732	0.972901		0.868234				1.21203	0.830704	1.25601	0.913186					1.17034		1.07502
1.02716	0.957352			0.902023				1.4548	0.992939	1.02648						1.04628		0.976545
1.06896	0.89341			0.924418				1.05099	0.897525	1.17403						1.00554		1.06859
0.963883	1.01131			1.03031				0.978751	0.852644	1.05409						1.18844		1.14413
1.10698	0.831127			0.887038				0.981185	0.978202	1.00622						1.18618		1.04119
	1.04978			0.999878				1.22657	1.05344	0.952572						0.774048		1.04877
	1.03141							0.854548	0.965524	1.14207						0.90563		0.927369
	0.989768							1.18734	0.79903	1.23204						0.830704		0.904686
	1.0218							1.05431	0.839319	0.927355						0.992939
	0.986391							0.830547	0.945684	0.892188						0.897525
	1.22559							0.864988	0.811433	1.24768						0.852644
	0.856953							0.907652	1.10215	0.881669						0.978202
								1.40841	1.00905	0.935695						1.05344
								1.10231	0.966113	1.23905						0.965524
								1.17715	0.855215	1.15763						0.79903
								1.10892	1.04585	0.979379						0.839319
								1.01164	0.992841	1.27045						0.945684
								1.12113		1.32285						0.811433
								1.31137		0.939208						1.10215
								1.11816		0.898507						1.00905
								0.978104		1.3777						0.966113
										1.1842						0.855215
										1.17617						1.04585
										1.05336						0.992841
										1.03533
										1.06449
										1.19544
										1.01992
										1.17195
										0.918092

## Sheet: Fig 1 supp-source data 1D and E
	D21							T21							Q21
	0	2	4	8	24	48		0	2	4	8	24	48		0	2	4	8	24	48
cen	6109.82	6833.43	6888.27	8153.98	14937.4	19173.2		9422.35	11127.7	23160.4	10586.8	22019.5	20174.1		9799.49	17658.3	31621.1	18204.8	36105.5	24702.7
peri	1698.31	1662.81	1255.4	1719.58	2174.24	2712.45		2126.2	2272.18	4986.04	1980.84	3816.02	4753.33		2338.2	3909.97	7519.43	3895.82	7384.38	4645.49
cen	3399.12	7193.11	9438.69	9606.87	13214.3	16312		8505.87	15307.4	15586.6	13645.6	21853.3	22467.8		1903.29	28379.6	19982.5	13166.1	20523.4	17413.7
peri	897.653	2024.61	1862.88	1840.49	2094.34	2607		2020.01	3413.47	2889.65	2859.73	9078.01	3989.66		494.829	6855.13	4214.69	2946.18	3663.13	3670.62
cen	5433.66	6905.98	10414.9	10159.9	16704.9	18653.6		7428.48	12772.9	20125.6	12030.4	22098.1	20409.5		13532	18804.9	31659.1	21786.3	33050.4	24436.7
peri	1391.82	1931.05	2093.25	2105.89	2550.58	3014.17		3386.36	2461.99	4704.84	2206.58	3325.36	3955.79		2798.07	3702.35	6755.58	4840	9767.68	5185.54
cen	1	1.11843	1.12741	1.33457	2.44482	3.1381		1.54217	1.82128	3.79068	1.73276	3.60396	3.30191		1.60389	2.89016	5.17545	2.97961	5.90943	4.04311
peri	1	0.979095	0.739204	1.01252	1.28023	1.59714		1.25195	1.3379	2.93587	1.16636	2.24694	2.79885		1.37678	2.30226	4.42758	2.29393	4.34806	2.73535
cen	1	2.11617	2.7768	2.82628	3.88757	4.79887		2.50237	4.50335	4.58548	4.01446	6.42909	6.6099		0.559936	8.34909	5.87874	3.87338	6.03786	5.123
peri	1	2.25544	2.07528	2.05033	2.33313	2.90423		2.25032	3.80266	3.21911	3.18578	10.113	4.44455		0.551247	7.63673	4.69523	3.28209	4.08079	4.08913
cen	1	1.27096	1.91674	1.8698	3.07434	3.43298		1.36712	2.35069	3.70388	2.21405	4.06689	3.75612		2.49039	3.46081	5.82647	4.00951	6.08252	4.49727
peri	1	1.38743	1.50397	1.51305	1.83255	2.16564		2.43305	1.7689	3.38035	1.58539	2.38922	2.84217		2.01037	2.66008	4.85378	3.47746	7.01793	3.72573

## Sheet: Fig 1 supp-source data 1F and G
	D21							T21							Q21
	0	2	4	8	24	48		0	2	4	8	24	48		0	2	4	8	24	48
cen	26424.3	33320.2	21922.2	33329.3	33700.3	48951.9		19448.3	55156.6	56555.5	64844.5	31771.8	57892.1		26751.4	48958.1	72705.6	41117.7	71967.3	60979
peri	62093.5	72234.6	44620.1	72446	66773.1	97949.3		43207.3	115962	117145	134482	71094.3	110690		63297	107902	149807	84409.1	170292	116227
cen	15974.2	37327.5	22864.5	42229.5	38757.2	44527.3		24528.7	67629.4	60159.9	78700.1	54827.4	34061.4		36394.3	75863.4	77235.7	74733.8	56460.4	52838.5
peri	37455	84417.9	51838.6	87585.7	80879.9	92074.2		53845.5	141353	123676	173345	121015	75450.7		85167.9	154337	166888	154733	125588	121463
cen	24532.4	33852.9	21643.1	43920	31976.4	51352.1		27049	55549.5	52584.8	58587.8	80744.5	46980.7		31895.6	54463	81750.7	90907.1	83546.6	83864.8
peri	56083.7	75504	48269.4	93832.7	66340.6	95143.3		63547.9	115993	119474	128590	174591	92034.8		75449.2	112438	169606	185026	204279	157698
cen	1	1.26096	0.82962	1.26131	1.27535	1.85253		0.736	2.08734	2.14028	2.45397	1.20237	2.19086		1.01238	1.85277	2.75146	1.55605	2.72352	2.30768
peri	1	1.16332	0.718595	1.16672	1.07536	1.57745		0.695843	1.86754	1.88659	2.1658	1.14496	1.78263		1.01938	1.73774	2.41261	1.35939	2.74251	1.87181
cen	1	2.33673	1.43134	2.6436	2.42623	2.78744		1.53551	4.23365	3.76605	4.92668	3.43224	2.13227		2.27831	4.74911	4.83501	4.67839	3.53447	3.30773
peri	1	2.25385	1.38402	2.33842	2.15939	2.45826		1.4376	3.77393	3.30199	4.62808	3.23093	2.01443		2.27387	4.12059	4.45569	4.13116	3.35305	3.2429
cen	1	1.37993	0.882224	1.79028	1.30344	2.09324		1.10258	2.26433	2.14348	2.38818	3.29134	1.91505		1.30014	2.22004	3.33236	3.70559	3.40556	3.41853
peri	1	1.34627	0.860668	1.67308	1.18289	1.69645		1.13309	2.06821	2.13029	2.29282	3.11304	1.64103		1.3453	2.00482	3.02416	3.2991	3.64239	2.81184

## Sheet: Fig 1 supp-source data 1H
24						24						24
	D21	T21	Q21				D21	T21	Q21				D21	T21	Q21
CILIATED	51	35	20			CILIATED	25	17	8			CILIATED	26	18	6
TOTAL	76	82	76			TOTAL	50	57	39			TOTAL	50	52	54
	0.671053	0.426829	0.263158				0.5	0.298246	0.205128				0.52	0.346154	0.111111
48						48						48
	D21	T21	Q21				D21	T21	Q21				D21	T21	Q21
CILIATED	91	56	43			CILIATED	42	33	24			CILIATED	48	26	19
TOTAL	119	90	89			TOTAL	51	64	57			TOTAL	60	46	54
	0.764706	0.622222	0.483146				0.823529	0.515625	0.421053				0.8	0.565217	0.351852
72						72						72
	D21	T21	Q21				D21	T21	Q21				D21	T21	Q21
CILIATED	98	78	47			CILIATED	75	51	32			CILIATED	70	65	47
TOTAL	108	93	78			TOTAL	83	76	60			TOTAL	84	71	82
	0.907407	0.83871	0.602564				0.903614	0.671053	0.533333				0.833333	0.915493	0.573171
96						96						96
	D21	T21	Q21				D21	T21	Q21				D21	T21	Q21
CILIATED	71	98	86			CILIATED	91	57	48			CILIATED	62	53	67
TOTAL	86	114	110			TOTAL	99	75	66			TOTAL	85	72	88
	0.825581	0.859649	0.781818				0.919192	0.76	0.727273				0.729412	0.736111	0.761364
120						120						120
	D21	T21	Q21				D21	T21	Q21				D21	T21	Q21
CILIATED	81	91	73			CILIATED	38		36			CILIATED	78	49	62
TOTAL	93	109	82			TOTAL	43		47			TOTAL	102	61	77
	0.870968	0.834862	0.890244				0.883721		0.765957				0.764706	0.803279	0.805195
144						144						144
	D21	T21	Q21				D21	T21	Q21				D21	T21	Q21
CILIATED	81	81	64			CILIATED	42	46				CILIATED	71	76	70
TOTAL	92	92	87			TOTAL	47	52				TOTAL	92	93	81
	0.880435	0.880435	0.735632				0.893617	0.884615	#DIV/0!				0.771739	0.817204	0.864198
168						168						168
	D21	T21	Q21				D21	T21	Q21				D21	T21	Q21
CILIATED	52	64	63			CILIATED	67	63	49			CILIATED	68		55
TOTAL	78	81	76			TOTAL	76	79	59			TOTAL	74		74
	0.666667	0.790123	0.828947				0.881579	0.797468	0.830508				0.918919		0.743243
