# Supplementary material for: Trisomy 21 induces pericentrosomal crowding delaying primary ciliogenesis and mouse cerebellar development
Source: eLife. 2023 Jan 19;12:e78202. doi: 10.7554/eLife.78202 (PMC9851619; doi:10.7554/eLife.78202)
Supplement: Figure 3—source data 1. [file elife-78202-fig3-data1.xlsx]

## Sheet: Figure 3-source data 3B-D
Myo5a 2h
	D21
0.1243	1.16355	0.968994	1.03809	1.18862	1.18862	0.897777	1.18862	1.18862	1.18862	1.18862	0.679968	1.09668	1.18862	0.485514	0.772924	1.16333	1.18862	0.53173	0.750813	0.753657	1.18862	1.18862	1.18862	1.18862	1.18862	1.18862	1.00984	1.18862	0.869521	1.18862	1.18862	1.18862	1.05216	1.18862	1.18862	0.979135	0.731285	0.950648	0.905469	1.02764	1.18862	1.18862	1.18862	0.813191	1.18862	1.18862	1.11046	1.18862	1.18862
0.24859	1.05827	1.00929	1.22486	0.897145	0.930115	0.945817	0.734851	0.914463	1.04374	0.706774	0.61805	1.22486	1.12924	0.720029	0.62795	1.22486	0.893244	0.742901	1.22486	1.04185	1.11382	0.949095	0.958304	0.962859	0.690746	1.12048	0.947453	1.09103	0.916028	0.731342	1.10665	0.793861	1.22486	0.81837	0.979285	1.22486	0.809654	0.993749	1.22486	1.01893	0.897983	0.675494	1.10581	1.22486	0.969136	1.08998	1.22486	1.01699	1.10539
0.37289	1.06057	1.31395	1.22935	0.548969	0.777189	1.1524	0.400862	0.82247	0.826072	0.733044	0.788295	1.24515	0.629565	1.31395	0.783296	1.02342	0.693466	0.741448	0.994558	1.31395	1.00261	0.724635	0.767823	0.74283	0.394829	1.05065	0.71708	1.04131	1.31395	0.611486	1.03581	0.434831	1.26065	0.632787	0.899991	1.09536	1.11308	1.17137	1.02234	0.945466	0.913286	0.898846	0.880637	1.12144	0.886837	0.69204	1.11328	1.00681	1.19983
0.49718	1.41747	1.00525	1.16928	0.435528	0.849661	1.41747	0.276403	0.750926	0.760756	0.837422	1.31922	1.06677	0.417916	1.40929	0.937071	1.06969	0.633262	0.856141	0.943087	1.08641	0.920063	0.708102	0.880695	0.542309	0.305683	1.12496	0.88874	1.07714	0.982601	0.812801	1.01526	0.292143	1.10502	0.713509	1.05505	1.28078	1.41747	1.41747	0.899396	0.869141	0.780706	0.764928	0.845382	1.06726	0.813782	0.580513	1.03004	1.0053	1.05785
0.62148	1.24937	0.621811	1.02787	0.446087	0.9552	1.11089	0.200383	0.73458	0.775476	0.873609	1.57805	1.20092	0.498626	0.909298	1.17242	0.968126	0.609456	1.01063	0.802355	0.691604	1.21152	0.622789	0.885118	0.273296	0.269318	1.18228	1.38989	1.17034	1.12618	0.60681	0.793339	0.263723	1.03189	0.58927	0.855337	1.53232	1.3131	1.46057	0.695709	1.42863	0.698905	0.665679	1.42422	1.16297	0.922675	0.484057	0.847924	1.24763	1.18508
0.74578	0.666246	0.50317	0.942659	0.41432	1.19267	0.888322	0.16185	0.663278	0.583087	0.735418	0.847265	0.949965	0.48776	0.474	1.364	1.22871	0.634935	1.62298	0.726949	0.577214	1.27004	0.791155	0.882385	0.151598	0.288282	0.960713	1.73969	1.63866	1.29007	0.33333	1.03978	0.231435	1.14511	0.542692	0.997143	1.45549	1.27415	1.42134	0.583263	1.73969	0.596365	0.795262	1.57163	0.85184	1.0115	0.418793	0.810941	1.22303	1.24238
0.87007	0.478906	0.427662	1.20768	0.379416	1.29045	1.13144	0.169604	0.632507	0.633153	0.918429	0.665091	0.979314	0.58437	0.257499	1.94493	0.918423	0.599908	1.94493	1.00447	0.386957	1.19337	0.630201	0.836277	0.129152	0.28531	0.710823	1.50478	1.63475	1.22744	0.300256	1.17737	0.255772	1.13812	0.387534	1.05488	1.31758	1.14157	1.35627	0.53384	1.20618	0.913461	1.08412	1.52548	0.842142	1.08102	0.427307	0.744958	1.10821	1.17633
0.99437	0.446232	0.358259	1.19007	0.343528	1.21414	1.1296	0.195637	0.61977	0.574565	1.017	0.56459	0.873025	0.440514	0.242242	2.01419	0.822398	0.703837	1.68617	0.923662	0.470207	1.3108	0.782175	0.870891	0.113156	0.332071	0.539911	1.2186	1.23621	1.43926	0.399307	1.48899	0.256912	0.912081	0.408806	0.895504	1.233	1.07469	1.19733	0.638322	0.693932	0.946215	1.47537	1.78505	0.900161	1.14435	0.517223	0.689507	1.0005	0.998358
1.11867	0.432417	0.501704	1.17351	0.350624	1.36428	0.986494	0.25514	0.762699	0.713658	1.02446	0.512554	0.811315	0.40926	0.256255	1.34141	1.0494	0.946873	1.24953	1.1995	0.54523	1.26961	0.712177	0.832954	0.107329	0.366707	0.629092	1.16085	0.906505	1.64888	0.37419	1.83929	0.233103	0.578136	0.573489	0.893171	0.786464	1.02944	1.03389	0.646857	0.622762	0.970277	1.82759	1.60414	0.892551	1.0068	0.487988	0.529193	0.869139	0.972501
1.24296	0.464899	0.683734	1.1808	0.448029	1.38253	0.633408	0.246502	0.831261	0.583844	0.869371	0.634931	0.841986	0.571094	0.248252	1.26922	0.905016	0.771474	0.638671	1.159	0.518252	1.27753	0.850576	0.854956	0.112297	0.310153	0.664651	1.18314	0.901038	1.70763	0.264584	1.71641	0.233731	0.722726	0.62616	0.832536	0.914511	1.29202	0.88728	0.656324	0.446387	1.04147	1.52534	1.55006	0.88021	1.17761	0.480358	0.422499	0.836578	1.0155
1.36726	0.444897	1.0051	1.17036	0.460708	1.27985	0.639913	0.24265	0.898572	0.453556	0.822442	0.665869	0.935362	0.724662	0.216099	1.04078	1.23058	0.798962	0.655798	1.44896	0.558441	1.04407	1.08196	0.713445	0.10669	0.257295	0.636862	1.06804	0.939217	1.68349	0.187141	1.75721	0.189634	0.808158	0.692303	0.821934	1.06624	1.31206	1.04909	0.617882	0.385936	0.965074	1.31161	1.33619	0.9142	1.2112	0.433764	0.452091	0.964516	1.08305
1.49155	0.36203	0.831171	0.858591	0.439165	1.18342	0.724421	0.253035	0.882558	0.377202	0.87274	0.845507	0.944959	0.57307	0.196865	1.06924	1.33872	0.901588	0.578172	1.54772	0.617252	1.19583	1.03331	0.63488	0.104677	0.220436	0.933516	0.809352	0.829193	1.71945	0.206163	1.83385	0.205079	0.699563	0.715492	0.931924	1.19577	1.31298	1.05837	0.603752	0.462604	0.767414	1.48479	1.29745	1.20933	1.093	0.384368	0.568468	0.820043	1.03961
1.61585	0.344272	0.816823	0.877582	0.422204	1.25171	0.635971	0.258648	0.967896	0.365964	0.983725	0.77584	0.78022	0.562384	0.253179	1.2369	1.22037	0.878907	0.490081	1.63826	0.59935	1.1227	0.89018	0.626996	0.093719	0.202563	1.02199	0.783637	0.758242	1.38424	0.286137	1.62288	0.219074	0.762997	0.634785	0.965965	1.09119	1.32479	1.03723	0.660423	0.447496	0.663369	1.78115	1.49961	1.06927	1.03899	0.382461	0.50716	0.661527	1.19737
1.74015	0.334553	0.72904	1.10665	0.403151	1.18356	0.465743	0.312626	0.907057	0.404442	1.05928	0.634388	0.85469	0.501401	0.197524	1.36849	1.2189	0.655393	0.395883	1.65183	0.555359	1.3804	0.734271	0.635198	0.103867	0.207289	0.997601	0.801137	0.826704	1.48996	0.33606	1.4044	0.236826	0.988954	0.584309	0.888192	0.868348	1.33391	1.2529	0.694253	0.548475	0.819095	1.59137	1.63818	0.948791	0.99322	0.461484	0.492836	0.693116	1.36846
1.86444	0.379276	0.6437	1.1599	0.397352	1.24049	0.632642	0.341341	0.929004	0.31857	0.962295	0.575761	0.895134	0.692479	0.181149	1.25443	1.26931	0.497537	0.378605	1.49934	0.546848	1.34617	0.840695	0.693953	0.097833	0.205931	1.10271	0.850325	0.912052	1.45577	0.411654	1.47558	0.273082	1.04017	0.451978	0.768245	1.01147	1.28126	1.45937	0.669167	0.519046	0.821224	1.43317	1.65979	1.0665	1.01112	0.543785	0.498377	0.7117	1.29377
1.98874	0.491146	0.706244	1.10749	0.380058	1.35669	0.593776	0.340447	0.836075	0.293218	0.950632	0.492177	0.992879	0.913135	0.213729	0.956662	1.2608	0.438585	0.39231	1.60332	0.775148	1.2914	0.826551	0.710631	0.072615	0.196689	1.10974	0.9109	0.963966	1.56441	0.471912	1.4082	0.232386	0.831306	0.444017	0.883211	1.0859	1.29816	1.31932	0.583986	0.44562	0.944476	1.38017	1.28848	1.35624	1.13893	0.595534	0.568397	0.852535	1.38411
2.11303	0.487744	0.686092	1.17129	0.379533	1.25357	0.672345	0.297767	0.880723	0.238674	0.916206	0.49285	1.03896	0.801146	0.256738	0.890529	1.22397	0.534195	0.443737	1.32172	0.866867	1.24934	0.847164	0.593628	0.063853	0.183759	1.09081	0.7653	1.03762	1.43079	0.496662	1.72557	0.256254	0.732941	0.318157	1.0229	1.14425	1.63792	1.34778	0.500349	0.509999	0.89227	1.45132	1.17506	1.39633	1.248	0.693797	0.567871	0.982997	1.32382
2.23733	0.49868	0.774134	1.2049	0.355995	1.23927	0.837971	0.261061	0.972248	0.313195	0.987795	0.544311	1.01571	0.60175	0.219127	0.964185	1.19833	0.463971	0.492934	1.12916	0.84506	1.10863	0.802914	0.52197	0.078779	0.207415	1.12154	0.599212	1.00138	1.46342	0.385619	1.72478	0.260899	0.768612	0.347426	1.13136	1.2665	1.87487	1.25893	0.544432	0.454206	0.816836	1.41535	1.18052	1.28154	1.12005	0.741185	0.528023	0.850153	1.39533
2.36163	0.549045	0.678554	1.0636	0.37322	1.18062	0.718758	0.249765	0.964393	0.43263	1.05662	0.599698	0.980761	0.550977	0.204992	0.917182	1.18514	0.457657	0.60834	1.30881	1.01848	1.26297	0.741172	0.520395	0.086231	0.177525	1.23258	0.721319	0.970694	1.56466	0.429152	1.43456	0.281002	0.749417	0.231223	1.33037	1.33452	1.86676	1.11597	0.4821	0.562998	0.831816	1.64362	1.32977	1.09164	1.04296	0.698532	0.592134	0.657426	1.46225
2.48592	0.605064	0.655745	0.890215	0.372315	1.23629	0.653555	0.236087	0.755532	0.475374	1.04624	0.649944	1.05663	0.43275	0.190667	1.1066	1.49835	0.494512	0.453768	1.114	0.974094	1.2143	0.729808	0.536032	0.078114	0.17979	1.25006	0.648826	0.845498	1.7007	0.347069	1.46455	0.292723	0.730874	0.242737	1.4647	1.39972	2.06092	1.17857	0.460902	0.723788	0.865463	1.81557	1.59573	1.02817	1.17745	0.676547	0.651119	0.676759	1.47248
2.61022	0.618781	0.714989	1.03489	0.388286	1.11	0.702881	0.189999	0.754217	0.50927	0.946206	0.629292	0.992607	0.479487	0.186459	1.10603	1.56517	0.534194	0.454824	1.19916	0.815079	1.41099	0.694276		0.071525	0.177932	1.23447	0.705829	0.79156	2.03001	0.347327	1.45999	0.270744	0.88935	0.306757	1.3068	1.34284	2.11965	1.03161	0.469548	0.67532	0.968473	1.73687	1.39446	0.873806	0.987887	0.653354	0.740527	0.647017	1.43721
2.73451	0.570672	0.615821	0.941275	0.364421	0.975464	0.827912	0.221787	0.748794	0.530289	0.983293	0.74491	0.884707	0.746177	0.1873	1.12044	1.66859	0.611136	0.481553	1.19564	0.973724	1.35924	0.745426		0.067224	0.185579	1.28403	0.783097	0.730972	1.79355	0.339765	1.43136	0.285037	0.917219	0.274647	1.21686	1.39952	1.71081	1.17501	0.479029	0.627145	0.943807	1.58775	1.12244	1.15271	1.08174	0.566112	0.725809	0.61826	1.30234
2.85881	0.532474	0.64759	0.77979	0.362154	0.878583	0.975966	0.258213	0.823765	0.445221	0.893695	0.617187	0.828882	0.806271	0.162402	1.20801	1.07659	0.462315	0.497324	1.50928	1.06794	1.37432	0.744158		0.076677	0.188972	1.42308	0.752933	0.720653	1.62893	0.272721	1.31718	0.27757	0.921373	0.225474	1.20615	1.33442	1.60855	1.33006	0.47878	0.566049	1.03064	1.60249	1.13394	1.26584	1.10504	0.573975	0.785012	0.553017	1.13376
2.98311	0.524533	0.701599	0.945258	0.323799	1.05514	1.03318	0.292469	0.828087	0.542952	0.881019	0.65281	0.844495	0.841827	0.167507	1.01658	0.934257	0.492466	0.558716	1.57999	1.10349	1.17424	0.80675		0.083742	0.183421	1.24016	0.641327	0.827177	1.56167	0.297272	1.21966	0.281863	0.814163	0.231487	1.17284	1.25578	1.54892	1.23209	0.577943	0.520782	1.06497	2.03316	1.32631	1.11992	1.20589	0.619869	0.804804	0.627239	1.1846
3.1074	0.539131	0.656182	1.03413	0.318344	1.13492	0.752147	0.269417	0.903736	0.461703	0.780283	0.799203	0.900966	0.691299	0.175367	0.95275	1.00279	0.491264	0.484763	1.52548	1.02219	0.935351	0.77895		0.072233	0.175575	1.09356	0.664031	0.897575	1.51242	0.339205	1.28767	0.294308	0.905461	0.250115	1.12519	1.20897	1.75737	1.16576	0.465264	0.440162	1.17195	1.88983	1.64812	1.25732	1.17182	0.586126	0.824289	0.665975	1.17136
3.2317	0.558547	0.719318	1.27001	0.311909	1.12078	0.704362	0.277295	0.871267	0.439427	0.840178	0.780787	0.828033	0.669467	0.175349		1.09714	0.423187	0.495217	1.38447	0.901459	1.11031	0.805353		0.064699	0.182666	0.894744	0.742545	0.928273	1.54984	0.376111	1.15409	0.271223	0.974686	0.274521	0.91602	1.25683	1.7689	1.25551	0.446077	0.419613	1.06881	1.64505	1.77974	1.19497	1.12075	0.607807	0.779654	0.517484	1.10297
3.356	0.543704	0.788614	1.34775	0.313099	1.1569	0.717307	0.267954	0.808931	0.418707	0.97201	0.618226	0.79386	0.67767	0.176424		1.0683	0.448717	0.425726	1.25091	0.828352	1.27316	0.80132		0.070481	0.169082	1.00673	0.802015	0.866646	1.72754	0.40877	1.08217	0.279483	0.851528	0.450086	0.885871	1.2624	1.57497	1.29805	0.514272	0.578959	0.945608	1.43773	1.62993	1.15696	1.13648	0.60783	0.87379	0.584089	1.22051
3.48029	0.537701	0.823094	1.12031	0.357815	1.10048	0.872435	0.267029	0.710367	0.437012	0.98357	0.517689	0.771161	0.673708	0.196339		1.207	0.471997	0.431094	1.2768	0.916185	1.21714	0.845915		0.068078	0.176059	1.15804	0.693834	0.836681	1.8761	0.520462	1.12345	0.282209	0.718254	0.445547	0.99868	1.30729	1.5316	1.21141	0.539901	0.79719	0.929955	1.42797	1.45098	1.22297	1.19967	0.642365	0.937906	0.689085	1.28038
3.60459	0.545372	0.683826	0.921236	0.352338	1.114	1.02302	0.229764	0.556988	0.544439	1.02001	0.562353	0.751083	0.554942	0.222154		0.965485	0.393931	0.46452	1.35645	0.950853	1.28262	0.976422		0.057743	0.179125	1.24215	0.720034	0.82134	1.88878	0.646585	1.26886	0.287325	0.75629	0.513217	1.07023	1.37534	1.62525	1.13126	0.512322	0.918777	0.848441	1.41143	1.25411	1.29125	1.15389	0.618916	1.11867	0.663857	1.28158
3.72888	0.561599	0.601066	0.828451	0.390059	0.992316	1.09582	0.194594	0.540898	0.563645	1.08851	0.551299	0.750791	0.480398	0.227202		1.02683	0.40825	0.469204	1.31657	0.900846	1.43904	1.14652		0.065752	0.175186	1.31078	0.793883	0.934711	1.82424	0.576752	1.21778	0.28491	0.848789	0.5174	1.13846	1.44361	1.67038	1.12214	0.500698	0.843675	0.681172	1.54481	1.23421	1.38383	1.07896	0.621824	1.24106	0.665027	1.33919
3.85318	0.569976	0.502105	0.872126	0.401629	0.977708	0.979754	0.181363	0.624735	0.4807	1.12271	0.629585	0.700519	0.598927	0.227567		0.954002	0.425366	0.551843	1.37218	0.824548	1.36735	1.09062			0.182319	1.20091	0.712706	0.876698	1.77209	0.590806	1.11448	0.263184	0.935898	0.495475	1.15901	1.28281	1.36451	1.04173	0.586568	0.600596	0.784474	1.74791	1.36116	1.29028	1.02472	0.651072	1.40937	0.572968	1.2442
3.97748	0.560874	0.525276	0.932116	0.420833	1.00257	1.09645	0.180829	0.645255	0.485729	1.0582	0.654147	0.740128	0.795075	0.244845		1.03336	0.399357	0.614338	1.64096	1.00122	1.32015	1.06669			0.146499	1.32659	0.79403	0.760976	1.70219	0.453589	1.00193	0.240237	0.866815	0.44021	0.992826	1.21431	1.32992	0.975797	0.594222	0.481535	0.993529	1.99983	1.53668	1.20164	0.92916	0.583736	1.41598	0.562211	1.08369
4.10177	0.549787	0.566247	0.858602	0.459866	1.01487	1.07244	0.169956	0.73465	0.451682	0.986039	0.630704	0.766123	0.768731	0.247926		0.879985	0.457327	0.656928	1.71286	1.02019	1.2348	1.07344			0.154278	1.26759	0.990122	0.737496	1.61138	0.413066	1.01682	0.235303	0.765206	0.489677	0.956332	1.02458	1.48065	1.23128	0.575569	0.491887	1.13725	1.89854	1.569	1.14606	0.950856	0.604481	1.27852	0.595179	1.08804
4.22607	0.598124	0.599189	0.813533	0.42887	0.937726	1.03844	0.163636	0.800531	0.416085	0.98813	0.540045	0.764085	0.778757	0.243241		0.885786	0.5195	0.595325	1.77866	1.11278	1.25944	1.05295			0.157782	1.27042	0.876266	0.77737	1.57963	0.488737	1.05031	0.239224	0.719454	0.475322	0.957794	1.08973	1.48488	1.27481	0.501527	0.497528	1.21512	1.76983	1.67972	1.28331	1.03589	0.614234	1.0397	0.630883	1.09838
4.35036	0.584595	0.607184	0.931083	0.399975	1.00008	0.824862	0.165348	0.693575	0.377858	0.916394	0.498829	0.735665	0.861365	0.210061		0.947665	0.569858	0.675324	1.68654	1.11291	1.35292	1.04906			0.164713	1.21751	0.919671	0.808966	1.70164	0.525184	1.08134	0.224445	0.746924	0.458317	0.921967	1.18097	1.61165	1.2631	0.483259	0.561468	1.11179	1.66696	1.60669	1.4353	1.0551	0.672384	1.03141	0.547013	1.07234
4.47466	0.627513	0.656589	1.06235	0.35882	1.04731	0.900544	0.19975	0.627446	0.376181	1.00022	0.544711	0.774453	0.70681	0.209216		1.07491	0.581045	0.680814	1.54171	1.18015	1.39778	1.07925			0.179197	1.26743	0.951326	0.83901	1.76103	0.526029	1.11733	0.209952	0.792121	0.507772	0.88868	1.16808	1.50547	1.33241	0.457423	0.555279	1.05713	1.77781	1.59088	1.39042	1.03946	0.63175	1.07983	0.474724	1.08147
4.59896	0.646741	0.684583	1.07157	0.366462	1.06931	0.876089	0.224841	0.606345	0.388913	1.02898	0.568766	0.774473	0.607544	0.210865		1.05244	0.571669	0.676109	1.59248	1.0592	1.46028	1.1795			0.175413	1.36136	0.961214	0.783842	1.92865	0.534402	1.22053	0.227522	0.810846	0.517239	0.863016	1.00135	1.34396	1.32028	0.415721	0.541058	1.01335	1.95231	1.68833	1.17035	1.00166	0.640593	1.07241	0.445532	1.14904
4.72325	0.618408	0.654395	1.12478	0.387914	1.06164	1.0052	0.231913	0.597432	0.376866	0.999742	0.552269	0.675114	0.549029	0.207326		1.15478	0.479198	0.619748	1.62682	1.16653	1.43196	1.17173			0.177771	1.45516	0.896072	0.804417	1.90956	0.49791	1.18198	0.219636	0.854951	0.424586	0.818926	1.05041	1.29421	1.25204	0.381255	0.54222	0.929243	2.14844	1.68616	1.17902	0.892284	0.641673	1.06654	0.444456	1.06926
4.84755	0.587428	0.657935	1.11958	0.42115	1.16925	0.882736	0.240921	0.592523	0.462406	0.941963	0.557621	0.70982	0.566573	0.196234		1.02377	0.550987	0.633361	1.6682	1.26534	1.50072	1.17991			0.188727	1.37856	0.904249	0.767871	1.85705	0.49542	1.31475	0.200061	0.825521	0.420369	0.777666	1.17008	1.29478	1.17422	0.402669	0.566998	0.947335	1.86254	1.41261	1.14526	0.926463	0.670616	1.01366	0.539323	1.14853
4.97185	0.572663	0.594706	1.09442	0.390543	1.08855	0.838421	0.233299	0.562484	0.488811	0.947162	0.549725	0.758406	0.572077	0.192425		0.921929	0.613493	0.595866	1.73303	1.24333	1.47043	1.27105			0.187604	1.33043	0.863102	0.753074	1.81602	0.468322	1.41637	0.199652	0.86761	0.473509	0.901346	1.23448	1.56197	1.16024	0.458504	0.532891	0.892201	1.83774	1.37426	1.19313	0.990871	0.743605	1.07084	0.504305	1.20582
5.09614	0.572502	0.646989	0.979899	0.393932	1.08364	0.751189	0.24541	0.523917	0.511762	0.991655	0.557504	0.830713	0.483157	0.173016		1.02888	0.619028	0.598234	1.7523	1.45202	1.40159	1.29439			0.166934	1.28905	0.806582	0.736575	1.7732	0.590783	1.49888	0.200539	0.83743	0.481718	0.933006	1.31768	1.5306	1.14441	0.53363	0.576319	0.878752	1.95474	1.41233	1.21342	0.95709	0.755495	1.13174	0.53973	1.16737
5.22044	0.643858	0.689334	0.924285	0.380581	1.02711	1.0028	0.226383	0.566994	0.502345	1.03049	0.484976	1.08544	0.519749	0.15582		1.10135	0.566842	0.671807	1.76622	1.3102	1.30745	1.11814			0.162233	1.22154	0.823766	0.805338	1.80348	0.615661	1.53479	0.207008	0.811669	0.48613	0.912181	1.10648	1.44839	1.18961	0.538017	0.508984	0.914507	1.97212	1.36206	1.10031	0.95945	0.761783	1.21218	0.693382	1.18228
5.34473	0.609551	0.748655	0.892218	0.389671	0.959729	1.01306	0.224239	0.622607	0.520481	0.972191	0.510876	1.5102	0.559766	0.155336		1.05159	0.476082	0.645091	1.77819	1.44594	1.35933	1.08014			0.17589	1.1384	0.81952	0.817038	1.81085	0.570573	1.24696	0.220884	0.726004	0.515549	0.941114	1.15597	1.57592	1.1561	0.502187	0.59665	0.894578	2.1561	1.54704	1.23253	1.01036	0.724293	1.20517	0.768534	1.18488
5.46903	0.557022	0.802976	0.933067	0.40231	0.931153	0.891974	0.231655	0.588684	0.553219	0.883069	0.547878	1.5415	0.664117	0.154805		1.03637	0.578489	0.599871	1.78143	1.42478	1.19843	1.05837			0.17924	1.24204	0.778404	0.828164	1.81207	0.566786	1.16286	0.198726	0.780829	0.507162	0.940353	1.28871	1.41263	1.19589	0.492922	0.695053	0.92202	1.96523	1.65296	1.15688	0.990249	0.74319	1.21684	0.912136	1.12014
5.59333	0.555495	0.795311	0.935669	0.400064	0.949984	0.852708	0.238399	0.504589	0.555395	0.923507	0.628382	1.28415	0.667017	0.151924		0.928638	0.582162	0.546282	1.60244	1.50579	1.18478	1.12369			0.192085	1.2258	0.811191	0.810984	1.82749	0.576512	1.18828	0.199834	0.745955	0.535343	0.969178	1.19139	1.40264	1.20129	0.513006	0.766318	1.02148	1.8091	1.93527	1.21517	0.959637	0.697472	1.19871	0.862827	1.06822
5.71762	0.577897	0.773524	1.0005	0.426118	1.07179	0.943252	0.227939	0.44307	0.617053	0.886399	0.621224	1.18543	0.672004	0.164633		1.04252	0.67013	0.591508	1.56416		1.09685	1.01965			0.186202		0.846904	0.808792	1.72288	0.521474	1.3231	0.186482	0.687797	0.571705	0.878857	1.13862	1.35771	1.1665	0.493011	0.709535	0.948652	1.97298	1.74622	1.16657	1.0351	0.619333	1.2458	0.890562	1.04589
5.84192	0.563042	0.755588	0.850739	0.377032	1.29343	0.984643	0.229561	0.506595	0.607293	0.872423	0.580526	1.19682	0.682254	0.176297		1.02204	0.643903	0.727637	1.59587		0.999374	0.990046			0.175164		0.879956	0.765738	1.62217	0.518517	1.2308	0.185036	0.687186	0.665231	0.875513	1.16679	1.43766	1.19135	0.468967	0.720274	0.864271	1.92889	1.61738	1.15321	1.03225	0.652682	1.22049	0.926693	1.03715
5.96621	0.59941	0.755874	0.895385	0.407258	1.19563	0.987554	0.226573	0.455233	0.596136	0.918177	0.565215	1.21851	0.746722	0.159431		1.01503	0.621559	0.738334	1.60418		1.18599	0.912409			0.183816		0.953916	0.748299	1.67804	0.539174	1.20501	0.20644	0.651305	0.692434	0.925438	1.21585	1.43301	1.20024	0.495947	0.74539	0.843619	1.83949	1.58313	1.23395	1.00481	0.704281	1.24952	1.02483	1.01581
6.09051	0.565544	0.890987	0.866518	0.418497	1.12891	0.927034	0.229244	0.477273	0.582885	0.84171	0.507786	1.25975	0.707538	0.149487		0.950477	0.527101	0.686397	1.54295		1.26169	0.945149			0.18478		0.926715	0.82407	1.64084	0.560419	1.33527	0.199695	0.691458	0.727693	0.962391	1.29553	1.3578	1.23107	0.533208	0.719284	0.844375	2.10067	1.52928	1.25788	0.910104	0.697996	1.22923	1.102	1.06579
6.21481	0.508985	0.904066	0.933811	0.416377	1.24315	0.892849	0.232825	0.533247	0.550578	0.831447	0.439186	0.934844	0.603633	0.153578		0.843073	0.540068	0.637558	1.5228		1.18539	0.974947			0.191461		0.976328	0.867943	1.71737	0.541742	1.36286	0.206904	0.821428	0.673327	0.984094	1.37349	1.65795	1.22243	0.508682	0.757499	0.890366	2.37167	1.40702	1.23989	0.880181	0.613924	1.22618	1.06462	1.1267
4h
0.1243	1.13154	0.406041	1.06727	0.728363	1.13154	1.13154	1.06564	1.13154	1.13154	1.03542	0.682891	1.13154	1.13154	1.07655	0.727274	1.13154	1.05557	1.13154	0.503073	0.874732	1.0283	0.998001	0.687262	0.915743	1.12326	1.13154	0.574168	0.688275	0.832904	1.13154	0.997653	0.805363	0.685431	1.13154	0.695528	1.13154	1.13154	1.09711	0.840699	1.13154	0.986582	0.821993	0.874272	1.13154	1.13154	0.988075	1.03512	1.0649	1.13154
0.24859	1.08962	0.527193	1.19431	0.772069	1.12352	1.02623	1.19431	0.901771	0.926611	1.19431	1.10649	1.04465	1.16613	1.19431	1.19431	1.05355	0.764561	1.15813	0.674275	1.19431	1.19431	0.932547	0.87304	1.19431	1.19431	1.04143	0.595445	0.628279	1.13774	1.02024	1.18371	0.868425	0.799925	1.06777	0.824991	0.926093	0.937198	1.19431	1.09264	1.02812	0.907405	1.05294	1.19431	1.09392	1.09396	1.19431	1.19431	1.12253	0.793584
0.37289	1.03652	0.852989	0.968626	0.943776	0.884142	1.0125	0.952572	0.763882	0.891123	0.996033	1.27744	0.908975	0.911551	1.10012	1.13825	0.665741	0.872317	0.926434	1.02074	1.03831	1.11924	1.13545	0.761809	1.07209	1.0451	1.21739	1.15277	0.645615	1.28697	0.987922	1.28697	1.06086	1.28697	0.962757	0.944146	0.930021	0.759831	0.949387	1.28697	0.672852	1.28697	1.2168	1.16542	1.05715	0.779343	1.20307	1.17148	1.28697	0.676698
0.49718	1.00531	1.41707	0.925941	0.973784	0.666669	0.973894	0.636661	0.715179	0.902205	0.906293	1.41707	0.756858	0.727663	1.23443	0.912051	0.587741	1.07811	0.822729	1.41707	1.09646	1.02305	1.41707	1.06532	0.850464	0.940256	1.19244	1.41707	0.862705	1.13305	1.00807	1.31347	1.41707	1.32109	0.479246	1.04317	1.01818	0.658786	0.916679	1.26038	0.504482	1.17521	1.41707	0.935876	1.03728	0.605115	1.26889	1.01674	1.25565	0.530282
0.62148	0.959486	1.25321	0.962411	1.28468	0.668206	0.746309	0.557662	0.592156	0.835629	1.0723	1.34737	1.07782	0.904077	1.12111	0.923881	0.508465	1.7052	0.953005	1.20285	1.31122	1.16262	1.3786	1.10551	0.700177	0.990983	0.991169	0.72071	1.19466	1.08189	1.13331	1.35244	1.36127	1.29145	0.398552	1.7052	1.36973	0.683276	0.848003	1.12705	0.525111	0.978532	1.16791	0.604797	1.21355	0.508663	1.40305	1.01786	1.58968	0.318341
0.74578	0.902245	1.05755	0.57545	1.97404	0.714917	0.852885	0.690726	0.443956	0.814678	1.0839	1.29627	1.32686	0.897736	1.10549	1.00344	0.497508	1.88994	1.07892	1.24282	1.35927	1.25327	1.64701	0.992013	0.574724	1.16851	1.22119	0.411869	1.49977	1.20161	1.20849	1.41454	1.34122	1.29641	0.460633	1.39143	1.51852	0.794734	0.982068	1.32155	0.495077	1.19822	1.20337	0.398757	1.23083	0.553971	1.48751	1.12438	1.80585	0.38429
0.87007	0.859858	0.8096	0.479656	1.70259	0.576964	0.781122	0.577197	0.479389	0.94956	1.00257	1.33256	0.712089	0.784693	1.34039	0.629815	0.530252	2.13553	1.14038	0.690409	1.26474	1.39381	1.67612	1.2385	0.528618	1.15818	1.42312	0.252409	2.25856	1.308	1.11202	1.21468	1.8725	1.30279	0.526957	1.098	1.62334	1.01011	1.07716	1.28394	0.520184	1.34657	1.3066	0.218739	1.39323	0.402394	1.28789	1.2993	1.60969	0.243148
0.99437	0.90767	0.675455	0.546837	1.04145	0.577352	0.867181	0.414963	0.446809	0.99672	1.08256	1.3067	0.588618	0.828194	1.2338	0.418164	0.559534	1.31478	0.983562	0.545832	1.74135	1.21007	1.60154	1.14644	0.568086	1.2224	1.6702	0.299515	1.50172	1.49815	1.13768	1.26002	2.29389	1.58101	0.6743	0.900538	1.3004	0.931505	1.28622	1.61953	0.452389	1.2877	1.2301	0.241102	1.33061	0.303269	1.607	1.38382	1.53495	0.299727
1.11867	0.6758	0.585581	0.458267	0.847037	0.704541	0.758103	0.453279	0.609878	0.934024	0.90257	1.5021	0.500877	0.655488	1.22771	0.256419	0.492441	1.1944	1.01709	0.503925	1.69032	1.17578	1.23252	0.884364	0.641774	1.24757	1.75659	0.373825	1.03368	1.61929	1.04854	1.44313	2.60933	1.60333	0.640006	0.793254	1.19495	0.775132	1.45929	1.81542	0.411978	1.54493	1.10996	0.255778	1.38837	0.31751	1.83054	1.36296	1.47074	0.359563
1.24296	0.290338	0.773068	0.582963	0.592914	0.848262	0.645973	0.562491	0.68252	0.926691	0.773883	1.33615	0.494163	0.400291	1.48312	0.389713	0.592548	0.973339	1.06967	0.4528	1.6906	1.2258	1.22202	0.830254	0.645618	1.29435	2.14408	0.297521	0.817806	1.39027	1.2418	1.57103	2.06395	1.8136	0.419213	0.777177	1.05273	0.714174	1.55047	1.62096	0.501185	1.77764	1.02339	0.332415	1.41609	0.277665	2.19905	1.2305	1.53225	0.272813
1.36726	0.232427	0.776029	0.297149	0.534605	1.10366	0.548421	0.75001	0.666027	0.966654	0.882857	1.12182	0.583092	0.358278	1.66021	0.435386	0.537728	0.792829	1.35836		1.86448	1.32304	1.31944	1.03918	0.586633	1.31967	2.1945	0.306176	0.783479	1.19866	1.19416	1.77339	1.97658	1.89894	0.390644	0.823333	1.06864	0.843742	1.49282	1.50721	0.577485	2.09833	1.23357	0.303865	1.45909	0.306284	1.93352	1.14015	1.6442	0.124038
1.49155	0.303853	0.571149	0.210672	0.579262	1.16049	0.563043	0.731417	0.570298	0.857808	1.22625	1.13813	0.63584	0.31717	1.70188	0.384545	0.536948	0.603824	1.24561		2.074	1.2414	1.50402	1.23318	0.62033	1.43271	2.3866	0.347415	0.669755	1.21555	1.26045	1.79173	2.0418	1.62205	0.580097	0.88434	1.09096	0.761691	1.45391	1.35527	0.676786	1.96798	1.52795	0.313025	1.39521	0.583479	1.59781	1.14051	1.38649	0.198004
1.61585	0.45646	0.525573	0.46228	0.510859	1.10853	0.481054	0.704402	0.527802	0.862249	1.30755	1.37366	0.615397	0.349287	1.83966	0.263728	0.431696	0.490608	0.882698		2.10007	1.16189	1.76296	1.6852	0.602913	1.31215	1.99396	0.340803	0.509833	1.36276	1.26797	1.67122	1.80183	1.27634	0.76777	1.03225	0.921339	0.809997	1.42467	1.48807	0.567914	1.53826	1.26779	0.23102	1.2089	0.626183	1.58127	1.25905	1.13641	0.222938
1.74015	0.610608	0.496629	0.604418	0.366517	0.668024	0.614953	0.776557	0.537908	0.810776	1.20718	1.43006	0.592525	0.396083	1.7015	0.19256	0.382031	0.52722	0.922014		2.39291	1.07761	1.6207	1.55069	0.65911	1.36539	1.99391	0.420995	0.429426	1.41446	1.27552	1.49344	2.20797	1.36682	0.666738	1.06697	0.982456	0.902817	1.26125	1.53705	0.481294	1.51522	1.06641	0.282057	1.36564	0.60016	1.79725	1.17762	1.20608	0.283848
1.86444	0.773867	0.577233	0.518366	0.396911	0.595783	0.684877	0.674493	0.621954	0.726009	1.0654	1.40442	0.513619	0.644709	1.7068	0.279685	0.404495	0.575011	0.87193		2.50688	1.11669	1.28341	1.3719	0.704474	1.05875	1.71179	0.429099	0.505975	1.40182	1.21771	1.59147	1.9095	1.61455	0.576761	1.06831	1.03758	0.994089	1.16382	1.55389	0.468651	2.03449	1.13565	0.237815	1.52332	0.566558	1.9363	0.944646	1.28322	0.53043
1.98874	0.621683	0.559439	0.394732	0.424058	0.663703	0.849039	0.672918	0.544994	0.669617	0.745519	1.28517	0.500309	0.741658	1.66437	0.294849	0.504055	0.71145			2.55531	0.775885	1.42133	1.3367	0.680498	0.92944	1.70319	0.396279	0.669181	1.17816	1.28172	1.53715	2.01408	1.75034	0.570953	1.03614	0.95117	0.925819	1.32833	1.63097	0.44088	1.95835	1.40339	0.211763	1.30272	0.481241	1.90646	0.939785	1.40835	0.366656
2.11303	0.636589	0.542683	0.275346	0.515361	0.518525	0.802645	0.718818	0.515248	0.68105	0.663621	1.16792	0.485356	0.626232	1.67967	0.356654	0.458787	0.796721			2.50902	0.775552	1.54592	1.68539	0.731303	1.06251	1.54758	0.335731	0.779587	1.24036	1.24651	1.52994	2.15849	1.59114	0.719683	0.971906	0.945037	0.887558	1.38365	1.65808	0.407217	1.59258	1.46078	0.248654	1.26557	0.27125	1.89699	1.03328	1.40837	0.249057
2.23733	0.67752	0.584441	0.229469	0.586739	0.416627	0.766195	0.789504	0.534441	0.789175	0.624809	1.2363	0.47468	0.660394	1.59501	0.411481	0.469087	0.840051			2.62598	0.858789	1.43104	1.68293	0.652708	1.16383	1.58648	0.296975	0.755474	1.31144	1.21865	1.60423	2.44315	1.52371	0.771143	1.02591	0.957058	0.768741	1.27586	1.54599	0.438871	1.7778	1.67464	0.309031	1.31216	0.368506	1.94321	0.980104	1.24659	0.367553
2.36163	0.607209	0.826015	0.15359	0.467765	0.453075	0.949632	0.794298	0.533214	0.827645	0.987663	1.16757	0.441339	0.698511	1.68841	0.375866	0.498587	0.85472			2.46091	1.04582	1.58363	1.68586	0.654823	1.12814	1.61038	0.22778	0.70268	1.2188	1.14942	1.60074	2.18034	1.35946	0.800024	1.20521	0.798297	0.738546	1.18377	1.54988	0.506708	2.11363	1.45471	0.290044	1.19961	0.395579	1.90452	1.01217	1.25354	0.477877
2.48592	0.816507	0.779906	0.221426	0.439545	0.431254	0.97519	0.809709	0.557839	0.81373	1.12307	1.12758	0.435109	0.78287	1.43604	0.353082	0.480482	0.84939			2.50265	1.22472	1.6699	1.33782	0.674129	1.03839	1.95721	0.196563	0.779036	1.10716	1.19552	1.64076	1.8544	1.54824	0.740556	1.10466	0.811871	0.689069	1.12393	1.45568	0.577059	2.49247	1.42124	0.283398	1.19257	0.511555	1.92472	1.01768	1.20222	0.664085
2.61022	0.663431	0.663476	0.258543	0.473294	0.412585	0.737802	0.828119	0.571301	0.757739	1.14267	1.159	0.424864	0.787355	1.33252	0.348172	0.487172				2.81598	1.097	1.74897	1.3356	0.700714	1.04463	1.96926	0.210201	0.763215	1.04933	1.07387	1.50358	1.92643	1.38027	0.794009	1.03172	0.96749	0.707014	1.01084	1.38712	0.581353	2.659	1.42128	0.277056	1.1478	0.493334	1.69006	1.11702	1.0449	0.878237
2.73451	0.966653	0.584173	0.421484	0.47129	0.4213	0.791663	0.797439	0.527311	0.673837	1.12233	1.34859	0.437077	0.794803	1.15332	0.479065	0.514435				3.01167	0.924299	1.86289	1.54559	0.716776	1.00172	1.80052	0.24896	0.655464	1.06256	1.01027	1.45907	2.06161	1.42254	0.768277	0.896441	1.07912	0.679338	1.05225	1.37228	0.503994	2.63943	1.33595	0.212873	1.1234	0.617705	1.8281	1.02945	0.995519	0.846774
2.85881	1.19573	0.562908	0.405647	0.484639	0.551324	0.897608	0.643239	0.568639	0.61656	1.19305	1.20145	0.434791	0.964893	1.28359	0.536083	0.522927				3.19545	0.936832	1.5902	1.63943	0.701834	1.05361	1.61916	0.277345	0.623619	0.967151	1.0353	1.72631	2.00042	1.58332	0.753998	0.878578	1.0031	0.695016	1.1993	1.2864	0.469825	2.20744	1.41951	0.256009	1.14565	0.763028	2.10964	1.09855	0.942394	0.90199
2.98311	1.28355	0.56518	0.558056	0.459642	0.587733	0.882931	0.607621	0.597974	0.588025	1.05549	0.903918	0.416437	1.34023	1.30898	0.627893	0.563919				3.18143	1.09128	1.42497	1.6219	0.772574	1.08902	1.58768	0.241679	0.70648	0.831199	1.03069	1.8129	2.25833	1.42043	0.670503	0.99629	1.06031	0.623444	1.25883	1.25163	0.503029	1.95087	1.50888	0.219861	1.23493	0.83596	2.3814	1.16864	0.926708	0.915205
3.1074	1.41345	0.55935	0.803226	0.447297	0.64374	0.727357	0.603838	0.573686	0.707281	1.03303	1.03527	0.471867	1.29074	1.30102	0.652993	0.611993				2.84742	1.21406	1.3212	1.47681	0.844148	1.19624	1.76518	0.20398	0.660759	0.904138	1.0324	1.97506	2.26315	1.14314	0.61018	0.9466	1.04461	0.703224	1.25046	1.12708	0.5487	1.8485	1.78223	0.242709	1.11187	0.980572	2.45348	0.991448	0.858588	0.786261
3.2317	1.62103	0.533852	0.709222	0.456205	0.539902	0.798574	0.692783	0.50266	0.633199	0.905953	0.990468	0.515871	1.11366	1.25	0.606288	0.758956				2.52638	1.14858	1.38885	1.3349	0.767994	1.25775	1.961	0.191222	0.649842	1.10846	0.998988	1.83493	2.25369	1.19484	0.527312	0.840144	1.0652	0.784002	1.48716	1.09084	0.554739	1.88434	1.76364	0.331577	1.03838	0.992465	2.2991	0.822547	0.887863	0.820674
3.356	1.54889	0.587068	0.613526	0.403681	0.490966	0.785435	0.726334	0.419986	0.675891	0.938754	1.0102	0.508183	1.19756	1.12284	0.602557	0.769177				2.57176	1.10976	1.44844	1.73104	0.745413	1.1824	1.8002	0.185278	0.602329	1.24582	1.00678	1.74385	2.24047	1.26488	0.577877	0.830028	0.993796	0.9186	1.55796	1.32365	0.544827	1.90854	1.72384	0.294992	1.09051	0.975418	2.13745	0.81251	0.838919	0.852644
3.48029	1.35885	0.586278	0.504264	0.398816	0.515189	0.866402	0.736709	0.450759	0.669257	0.963048	1.03206	0.481895	1.35582	1.13812	0.549105	0.657942				2.6718	1.08049	1.5376	1.93759	0.754536	1.08726	1.72418	0.234316	0.6253	1.34259	1.01157	1.93171	2.00439	1.32243	0.688428	0.914104	0.83533	0.923446	1.38593	1.44441	0.567247	2.05691	1.58937	0.270828	1.081	1.00935	2.27506	0.811533	0.704809	0.784099
3.60459	1.31147	0.56928	0.587362	0.402277	0.463052	0.842724	0.711383	0.463981	0.623131	1.259	1.20779	0.456039	1.43202	1.13596	0.571569	0.558611				2.85662	1.13253	1.64184	1.80388	0.7716	1.10851	1.77022	0.274186	0.609066	1.35802	1.00096	1.87172	2.07363	1.29065	0.731996	0.934461	0.878918	1.04636	1.32854	1.28023	0.607998	2.27785	1.38415	0.209593	1.10416	1.04539	2.35977	0.770373	0.859092	0.712059
3.72888	1.40799	0.601868	0.83317	0.397053	0.526612	0.811406	0.624029	0.42085	0.656303	1.38952	1.25163	0.381882	1.46693	1.22215	0.631306	0.502893				2.98652	1.09831	1.55078	1.78283	0.76179	1.07418	1.67142	0.263819	0.624628	1.34401	0.958878	1.94698	1.94633	1.3681	0.743856	0.773052	0.936087	1.08919	1.29444	1.16309	0.612118	2.31734	1.47088	0.173651	1.02727	1.03677	2.29695	0.755581	0.977508	0.867577
3.85318	1.49237	0.554833	1.04344	0.390489	0.567153	0.714092	0.634709	0.448143	0.597336	1.18738	1.28698	0.383223	1.46081	1.19855	0.635648	0.514735				3.21646	1.05813	1.36706	1.79014	0.795495	1.12651	1.60119	0.254805	0.641091	1.20808	1.00462	1.77992	1.9406	1.25589	0.79956	0.698051	0.96879	1.03335	1.25097	1.21329	0.506531	2.11121	1.52403	0.155174	1.0099	1.19474	2.10495	0.807484	1.03754	0.836451
3.97748	1.70856	0.534192	1.25188	0.390925	0.574652	0.696294	0.635288	0.45555	0.526107	1.24531	1.25098	0.351388	1.56612	1.45358	0.600806	0.405576				2.89857	1.07519	1.33219	1.64718	0.740791	1.08488	1.58819	0.201739	0.739024	1.17627	1.17079	1.69057	1.88115	1.3954	0.736994	0.709467	1.06519	0.939967	1.20326	1.347	0.523837	2.06629	1.61361	0.170536	0.975924	1.13291	1.83137	0.947301	0.971229	0.786359
4.10177	1.85514	0.563004	0.966876	0.420982	0.594278	0.803212	0.570901	0.40362	0.542419	1.27626	1.36739	0.30567	1.53004	1.34458	0.640257	0.369133				2.865	1.19097	1.18257	1.81761	0.69072	1.06504	1.58802	0.237498	0.737715	1.19421	1.12812	1.71264	1.76188	1.38856	0.508113	0.724731	1.2097	0.88956	1.1569	1.46916	0.484576	1.90432	1.62658	0.237817	0.936392	1.07239	1.82874	0.814104	0.944992	0.744809
4.22607	1.72381	0.520542	0.631223	0.396311	0.613601	0.864348	0.539087	0.363585	0.528972	1.27624	1.26384	0.277934	1.56608	1.2697	0.609036	0.409172				2.51855	1.03885	1.27954	1.85963	0.6703	1.21931	1.5665	0.334229	0.79711	1.0399	1.08059	1.69944	1.67444	1.44665	0.46749	0.770317	1.18015	0.851403	1.19415	1.43219	0.485044	1.81318	1.74957	0.306047	1.00191	0.976006	2.06615	0.799167	1.03679	0.850722
4.35036	1.58444	0.577521	0.584328	0.462822	0.640605	0.921979	0.567568	0.365947	0.533489	1.02715	1.32546	0.308312	1.5666	1.26506	0.618693	0.423184				2.3275	0.960589	1.44636	2.036	0.6621	1.30848	1.52048	0.33283	0.673253	1.09059	1.12145	1.76796	1.65603	1.36873	0.597229	0.668904	1.10966	0.848343	1.24014	1.30506	0.481875	2.02502	1.67941	0.286608	0.971828	1.04595	2.15598	0.791916	0.931129	0.871125
4.47466	1.27358	0.672344	0.631194	0.516042	0.543809	0.902311	0.587927	0.414307	0.610426	1.08495	1.16154	0.280384	1.49399	1.2844	0.604492	0.416284				2.25632	1.01225	1.466	2.01442	0.685281	1.15914	1.38927	0.310925	0.663734	1.11667	1.12616	1.7641	1.59583	1.33477	0.764121	0.669806	1.23471	0.726043	1.16004	1.32806	0.533314	1.90574	1.75127	0.318958	0.985435	1.18895	2.24321	0.788315	0.836451	0.924614
4.59896	1.28541	0.707754	0.658048	0.476976	0.548084	0.831951	0.656994	0.38321	0.527948	1.09562	1.26479	0.303774	1.30806	1.21077	0.48642	0.36618				2.43307	0.905851	1.48339	2.3776	0.595855	1.1393	1.29178	0.274529	0.664679	1.25917	1.02232	1.77999	1.57645	1.31828	0.814496	0.711742	1.24979	0.675767	1.15601	1.20182	0.526603	2.19725	1.70464	0.424245	0.941003	1.28848	2.05011	0.686781	0.811471	0.832937
4.72325	1.39815	0.954554	0.730932	0.418219	0.539934	0.868293	0.64705	0.401426	0.569568	1.02845	1.3423	0.26778	1.26297	1.17664	0.525535	0.356054				2.49671	0.730439	1.48238	2.46662	0.641471	1.06762	1.14766	0.334546	0.676967	1.25485	0.994349	1.53431	1.61661	1.39289	0.848372	0.701108	1.19491	0.720486	1.16805	1.27456	0.491704	2.16398	1.7933	0.398371	0.907193	1.29047	2.14495	0.682741	0.828068	0.848458
4.84755	1.28364	0.882932	0.85383	0.340618	0.591292	0.951234	0.594459	0.440068	0.505477	0.907467	1.41771	0.284868	1.25619	1.18714	0.528911	0.422036				2.53623	0.789584	1.55005	2.78834	0.62239	1.04487	1.1658	0.36608	0.697787	1.10329	0.945266	1.45431	1.49329	1.45478	0.926746	0.682243	1.12775	0.719808	1.19566	1.35793	0.437624	2.20915	1.87926	0.34593	0.930273	1.31495	2.08344	0.717305	0.869712	0.632364
4.97185	1.40575	0.864296	0.897906	0.350188	0.575791	0.991959	0.591933	0.422378	0.545753	1.08702	1.31823	0.260026	1.24414	1.1533	0.520484	0.453121				2.54499	0.818341	1.47429	2.93184	0.631165	1.08951	1.19794	0.387917	0.656254	1.03178	0.93756	1.49677	1.4302	1.41952	1.09848	0.758983	1.09591	0.653859	1.13905	1.28271	0.432262	2.071	1.81292	0.391825	0.983677	1.37271	2.0439	0.689442	0.924577	0.702754
5.09614	1.65113	0.801009	0.974472	0.348331	0.505083		0.64139	0.401625	0.580151		1.40954	0.24893	1.42715	1.15561	0.594045	0.435066				2.64559	0.820185	1.46351	2.85214	0.606883	1.07191	1.21569	0.379545	0.586049	1.13094	0.855039	1.60363	1.5659	1.29154	1.06379	0.866976	1.14474	0.727797	1.12147	1.23426	0.485935		1.82471	0.361234	1.04329	1.2821	1.87885		0.98654	0.801246
5.22044	1.77424	0.906979	1.04087	0.377555	0.525374		0.615968	0.398903	0.604153		1.19139	0.264756	1.65069	1.23855	0.62197	0.416457				2.39551	0.903765	1.5085	2.637	0.643042	1.08286	1.1378	0.305377	0.703919	1.14331	0.840682	1.80305	1.74969	1.29058	1.11797	0.938388	1.19871	0.76533	1.10402	1.07118	0.50286		1.6983	0.401247	0.981332	1.2549	1.85698		0.918999	0.909018
5.34473	1.93035	0.83362	0.998816	0.407695	0.509696		0.513627	0.407441	0.554417		1.18979	0.311729	1.8799	1.20028	0.66556	0.365752				2.3438	0.961671	1.4409	2.59642	0.634828	1.11218	0.848934	0.306834	0.724994	1.05238	0.873022	1.91765	1.70992	1.21151	1.0545	0.862987	1.21579	0.853421	1.07913	1.25953	0.489443		1.71624	0.320778	0.955084	1.39854	1.9307		0.972529	0.962665
5.46903	1.85619	0.776685	1.03829	0.422757	0.550164		0.542696	0.392349	0.58879		1.35058	0.281504	2.11035	1.20698	0.671122	0.374237				2.34577	0.910316	1.36794	2.64965	0.648677	1.17188	0.84403	0.283955	0.726335	0.93593	0.917695	1.79508	1.84426	1.24773	1.11495	0.751927	1.20671	0.814335	1.11487	1.27523	0.470923		1.76189	0.31193	0.959279	1.59126	1.94184		0.932861	0.940854
5.59333	1.65257	0.838456	1.06064	0.475434	0.569187		0.61578	0.343144	0.533439		1.40345	0.245328	1.74185	1.26839	0.653297	0.374388				2.41611	0.844983	1.34198	2.54082	0.676731	1.21665	0.845124	0.285578	0.637353	0.864158	1.03876	1.75034	1.94394	1.26578	1.19616	0.754378	1.1335	0.801833	1.23012	1.13231	0.499852		1.69914	0.318345	0.898009	1.46061	1.94436		0.994979	1.02917
5.71762	1.48732	0.93107	0.957878	0.47586	0.612918		0.627006	0.327439	0.516405		1.40626	0.238199	1.4578	1.42371	0.621947	0.37264				2.34539	0.872485	1.27292	2.66224	0.671548	1.24342	1.08656	0.308719	0.598436	0.957482	1.06191	1.8662	1.72602	1.29753	1.29705	0.726238	1.16337	0.798159	1.19678	1.16227	0.550983			0.281879	0.922626	1.23398	1.91671		0.916001	1.20182
5.84192	1.4237	0.99004	0.822682	0.481867	0.621891		0.671866	0.323377	0.54025		1.36845	0.215568	1.34474	1.32915	0.557655	0.37767				2.30667	1.00086	1.23275	2.81142	0.707654	1.19133	1.33361	0.303532	0.642522	1.18032	1.04159	1.95597	1.58006	1.33309	1.41803	0.697185	1.22296	0.783777	1.18444	1.21449	0.51874			0.280982	1.01412	1.14595	1.74674		0.941737	1.20562
5.96621	1.58181	1.06819	1.03982	0.456776	0.609809		0.677928	0.351853	0.535518		1.33477	0.216047	1.55397	1.31773	0.501953	0.431227				2.41615	0.983544	1.17907	2.97178	0.715419	1.16993	1.25608	0.318763	0.504208	1.3183	0.944008	1.96457	1.53833	1.46414	1.37471	0.697998	1.17857	0.717563	1.12189	1.3654	0.484009			0.307031	1.07812	1.01324	1.66247		1.06398	1.1501
6.09051	1.443	1.0083	1.0974	0.447758	0.673165		0.719182	0.378869	0.521971		1.18872	0.201315	1.33559	1.29867	0.498464	0.490029				2.35845	0.956678	1.16188	3.22074	0.631025	1.14864	1.42462	0.348573	0.563281	1.29084	0.96486	1.79086	1.53045	1.5288	1.40443	0.709696	1.11006	0.700902	1.1413	1.3549	0.52363			0.369814	1.08457	1.09911	1.4945		1.10223	1.06049
6.21481	1.47864	0.993279	1.15218	0.38426	0.640846		0.730671	0.381569	0.513168		1.23453	0.226847	1.349	1.23906	0.503936	0.48094				2.43549	0.829452	1.30418	3.1633	0.609021	1.0787	1.32001	0.347193	0.536538	1.22342	0.943009	1.70271	1.90338	1.34236	1.35691	0.707958	1.02793	0.76829	1.22528	1.22479	0.526931			0.408071	0.981348	1.13189	1.49539		0.944019	1.02995
24h
0.1243	1.09027	0.975678	0.88776	1.09027	1.09027	0.7435	1.09027	0.961725	1.09027	1.09027	1.04339	1.02376	0.745844	1.09027	1.09027	0.465327	1.09027	1.09027	1.09027	0.944399	0.966545	1.09027	0.953621	1.09027	1.06496	1.09027	1.09027	0.9672	1.09027	1.09027	1.06257	1.09027	0.564511	0.800026	0.989392	0.936699	1.09027	1.09027	1.09027	1.01493	1.09027	1.09027	0.798882	1.09027	1.09027	1.09027	1.09027	1.03801	1.06651
0.24859	0.857522	1.09589	1.119	1.02712	0.880174	1.09873	0.839475	1.119	1.09102	0.934698	1.119	1.0928	1.119	0.886615	0.847712	0.667169	1.07979	0.835348	1.05163	1.119	1.03813	1.07222	1.119	0.789874	1.119	1.01045	0.999617	1.119	1.08134	0.832656	1.119	0.906885	1.04614	0.926494	1.119	0.928571	0.828413	1.09635	0.897923	1.119	0.993254	0.982758	0.703965	0.857209	0.964588	1.05013	1.02439	0.857634	1.119
0.37289	0.708678	1.22426	1.05141	0.907748	0.825842	1.22426	0.700305	1.106	0.89267	0.708262	0.947032	1.15689	1.14087	0.666851	0.651689	1.05998	1.18171	0.764631	1.07363	1.04665	1.22426	0.881808	1.18757	0.609026	1.15153	0.924819	1.01568	1.20832	0.959978	0.688453	1.12779	0.865372	1.22426	1.01795	0.869229	1.17612	0.81101	0.974262	0.721147	1.04393	0.912171	0.808545	0.958338	0.751744	0.944246	1.13736	0.965747	1.11856	1.10607
0.49718	0.541354	1.29331	0.947787	1.03243	0.945465	1.043	0.638987	0.905502	0.801683	0.718972	0.82085	1.40263	1.0357	0.585218	0.511242	1.40263	1.19484	0.724583	0.923139	0.895892	1.23774	0.894263	1.1425	0.581891	1.07079	0.866737	1.05403	1.35408	0.900323	0.845413	1.1469	0.790249	1.28124	1.40263	0.877991	1.40263	0.79071	0.951241	0.574589	1.14294	0.653252	0.722384	1.40263	0.659718	0.844202	1.16139	0.98203	1.40263	0.995142
0.62148	0.547065	1.2462	0.863974	1.36251	1.0182	0.848234	0.678179	0.685474	0.795228	0.875382	0.818742	1.09213	0.827934	0.586082	0.452579	1.66177	1.44694	0.720855	0.761235	0.735756	1.00028	0.891108	1.07352	0.499353	1.19979	0.737176	1.29693	1.4594	0.932071	1.05286	1.10443	0.902343	1.09329	1.27855	0.924374	1.40413	0.713853	0.953896	0.593238	1.3547	0.667148	0.572564	1.60263	0.688656	0.913604	1.17511	1.1603	1.70022	1.00823
0.74578	0.630951	0.908004	0.733641	0.964364	0.924553	0.576812	0.754039	0.539688	1.00422	0.960291	0.726412	0.800831	0.518007	0.609263	0.510277	1.62315	1.58838	0.753303	1.06972	0.697452	0.900401	0.801279	1.02851	0.57518	1.16986	0.657096	1.65499	1.40474	0.893528	0.921861	1.232	0.826787	0.929611	1.64063	0.949162	1.4459	0.610005	1.07737	0.688405	1.10231	0.756882	0.481777	1.89918	0.6422	0.962688	1.37054	0.983261	1.50861	1.21537
0.87007	0.534016	0.910701	0.571728	0.890105	1.00801	0.477142	0.944023	0.552211	1.27219	1.04536	0.726278	0.584846	0.439431	0.587691	0.480476	1.52279	1.58259	0.709476	1.53323	0.885945	0.71947	0.626258	1.15157	0.621696	1.1823	0.587166	1.60921	1.46334	1.1115	0.702719	1.30431	0.820271	0.528943	1.5264	0.883092	1.24381	0.540451	1.27133	0.636353	0.87984	0.837442	0.525386	1.31358	0.645136	1.02083	1.43231	0.99096	1.53914	1.20914
0.99437	0.462954	0.6857	0.509208	0.666347	1.08924	0.357069	1.04761	0.629091	1.23048	0.953156	0.855995	0.523135	0.413565	0.637115	0.466348	1.43069	1.51869	0.69346	2.03384	0.900192	0.691832	0.606165	1.16528	0.830962	1.06813	0.437474	1.46791	1.6147	1.60283	0.615468	1.45084	0.963248	0.662926	1.85973	0.869404	1.16006	0.555597	1.20891	0.735045	0.765714	0.853573	0.554348	1.13525	0.782618	1.10784	1.11765	1.18211	1.62651	1.30744
1.11867	0.448466	0.620413	0.527545	0.533952	1.08375	0.343697	0.969617	0.75052	1.1241	1.06174	0.781673	0.568631	0.406767	0.612642	0.467447	2.25799	1.72417	0.936329	2.17098	0.898314	0.836673	0.764111	1.02304	1.04003	0.8598	0.545367	1.64106	1.57391	2.06089	0.780199	1.43084	1.06793	0.602406	2.07414	0.864125	0.682018	0.713997	1.04286	0.731236	0.611198	0.79883	0.553237	1.04609	0.759397	0.97138	1.04893	1.12902	1.64004	1.209
1.24296	0.486163	0.50022	0.621882	0.454256	1.0067	0.388059	0.88961	0.847661	1.02117	0.960077	0.844235	0.558706	0.363372	0.604007	0.498914	2.84961	1.94604	0.837402	2.22422	0.973853	0.90882	0.577876	1.30805	1.27433	0.747543	0.609848	2.09866	1.48737	1.81581	0.991769	1.40881	1.2638	0.67794	2.06591	0.857042	0.755887	0.894329	1.13242	0.672089	0.417082	0.87456	0.495234	1.08138	0.797723	0.907076	0.955025	1.2026	1.71654	1.33008
1.36726	0.471982	0.521595	0.745792	0.54021	0.880275	0.463032	0.896128	0.8485	0.891178	1.02768	0.868217	0.607264	0.351471	0.637285	0.580621	2.59547	1.69975	0.839076	2.28197	0.934162	0.964837	0.578102	1.2024	1.40335	0.753725	0.72514	2.23429	1.36938	1.66576	1.07744	1.46307	1.46199	0.834038	2.45914	0.863934	0.731443	1.16231	1.32001	0.570627	0.440138	1.01225	0.520159	1.03698	0.78403	0.854356	0.935889	1.26444	1.58744	1.59953
1.49155	0.49228	0.676757	0.618693	0.527119	0.953283	0.563645	0.829179	0.729104	0.939048	1.06269	0.872252	0.581981	0.310277	0.591425	0.65763	2.55282	1.72342	0.9177	2.32995	0.836864	0.989712	0.539487	1.16898	1.22852	0.773274	0.822404	2.00788	1.28984	1.39813	1.01661	1.46378	1.38337	0.902686	3.13626	0.751543	0.720636	1.05986	1.28279	0.626166	0.433366	0.916786	0.450643	1.04896	0.813364	0.957686	1.00483	1.34531	1.46195	1.78193
1.61585	0.545982	0.852189	0.599471	0.661403	0.984184	0.67834	0.772182	0.701847	0.911403	0.890233	0.908145	0.625065	0.311597	0.534176	0.664583	3.01968	1.69661	0.816405	2.21242	0.913055	1.27047	0.396885	0.979398	1.00069	0.979655	0.73848	1.3343	1.44992	1.32428	0.863824	1.46857	1.43042	0.592849	2.92501	0.660615	0.633179	0.899122	1.32805	0.664093	0.47746	0.956781	0.468037	1.08288	0.66352	0.941369	1.20063	1.02444	1.45812	1.90338
1.74015	0.649218	0.750417	0.562171	0.806926	0.980601	0.577532	0.761849	0.799348	1.03484	0.936559	1.15924	0.494421	0.327297	0.552611	0.616388	3.09672	1.66674	0.833522	1.92198	1.01187	1.38066	0.365143	0.854212	0.993468	0.998493	0.559927	1.09947	1.56362	1.12065	0.732976	1.50286	1.35938	0.589936	2.57408	0.689914	0.847594	0.91473	1.10718	0.780542	0.482508	0.97266	0.502683	1.02739	0.703374	0.880599	1.2432	1.03792	1.7874	1.88749
1.86444	0.585747	0.685023	0.52612	1.13218	0.968176	0.495673	0.723487	0.798429	0.982375	1.08265	1.02826	0.470683	0.346029	0.584499	0.475337	2.75325	1.55183	0.84267	1.89	0.928465	1.6641	0.375915	0.82367	0.981437	1.02638	0.469727	0.922039	1.80156	1.08316	0.708258	1.44272	1.47819	0.560657	2.32558	0.988119	1.02025	0.871723	1.13365	0.767373	0.62128	1.03253	0.497095	1.12941	0.928939	0.879937	0.989686	1.17206	1.94466	1.90495
1.98874	0.502574	0.610393	0.562232	1.43798	0.945873	0.419952	0.72555	0.725583	1.0238	1.13272	1.07513	0.475077	0.333786	0.695611	0.445533	3.07191	1.50931	1.02216	1.90654	1.06904	1.51188	0.461424	0.870478	0.827468	0.906774	0.587391	0.959696	1.69832	1.073	0.619945	1.58888	1.47203	0.531895	2.02806	1.02086	1.02462	0.709452	1.10443	0.631205	0.768264	1.04203	0.580262	1.20741	1.06487	0.870803	0.979271	1.12437	1.88114	1.79546
2.11303	0.547706	0.48657	0.524283	1.27052	0.924968	0.463731	0.724395	0.725386	0.995879	1.06535	0.949905	0.495816	0.336686	0.631737	0.464609	3.3937	1.47325	1.02368	1.9657	1.19438	1.08915	0.507159	1.01402	0.788955	0.94609	0.524239	1.1717	1.62762	1.1175	0.676773	1.74539	1.43348	0.519675	2.17275	0.964654	1.06544	0.798492	1.12042	0.632685	0.916949	0.894725	0.60214	1.17584	1.13105	0.842481	1.08174	1.04651	1.60491	1.76768
2.23733	0.524077	0.555483	0.500323	1.1436	1.00692	0.53678	0.7028	0.977152	0.874724	1.09916	0.83567	0.491987	0.295075	0.547421	0.43237	3.22091	1.54648	1.0305	1.70004	1.22762	1.19163	0.634419	0.916475	0.828303	0.975673	0.563003	1.21517	1.62082	1.19881	0.733708	2.00881	1.35782	0.650477	2.3989	0.997944	1.13745	0.841417	1.06382	0.570275	0.837251	0.82686	0.525459	1.15578	1.04788	0.85261	1.01565	1.12896	1.41145	1.61365
2.36163	0.492277	0.552717	0.455665	0.935758	1.0273	0.658387	0.683451	0.953203	0.84082	1.13176	0.823322	0.4538	0.289234	0.580007	0.475707	3.33	1.48102	1.10108	1.48645	1.06392	1.36563	0.753752	0.98312	0.905643	0.976625	0.569497	1.44258	1.54351	1.33314	0.709739	1.85326	1.27587	0.778219	2.82191	0.927479	1.38895	0.710166	1.13527	0.526398	0.729425	0.855779	0.523728	1.03655	1.08795	0.862695	0.994203	1.13473	1.61559	1.66223
2.48592	0.50429	0.639514	0.427909	0.921092	0.997723	0.789184	0.70664	0.904709	0.904963	1.1733	0.863661	0.45159	0.305102	0.67742	0.505296	3.36126	1.46545	0.955311	1.52499	0.876892	1.43862	0.475746	0.974729	0.855341	0.973652	0.680343	1.51862	1.62883	1.15553	0.789925	1.6534	1.34317	0.728075	3.04675	1.10322	1.26407	0.74483	0.993288	0.614295	0.698212	0.819829	0.578702	0.969099	1.18116	0.802213	0.989128	1.07475	1.61757	1.4861
2.61022	0.519009	0.572846	0.45405	0.800072	0.775541	0.755077	0.708079	0.871111	0.934427	1.29744	0.874616	0.532752	0.303236	0.563612	0.465582	3.45144	1.33958	0.865439	1.83309	0.834736	1.31732	0.393287	1.18579	0.954337	0.951802	0.637887	1.45455	1.62396	1.08601	0.794027	1.51366	1.32861	0.761963	2.88765	0.902133	1.05807	0.740989	0.929345	0.576129	0.796145	0.951766	0.639596	1.04456	1.19712	0.831312	0.978547	1.12093	1.69656	1.40582
2.73451	0.547462	0.581916	0.544929	0.777141	0.734183	0.803268	0.72693	0.785083	0.926164	1.31701	0.837193	0.570774	0.308498	0.477142	0.441116	3.51188	1.24198	0.950968	1.91485	0.744817	1.22449	0.498711	1.19361	1.13475	0.840677	0.638574	1.39465	1.5131	1.05371	0.823775	1.50518	1.51471	0.66891	2.82077	0.92342	0.921189	0.700813	1.05485	0.567626	0.72653	1.09546	0.677239	1.01696	1.25383	0.853564	0.845643	1.29837	1.5367	1.49238
2.85881	0.576574	0.639375	0.604708	0.598137	0.73895	0.761171	0.714448	0.734315	0.816082	1.40955		0.570226	0.312217	0.437333	0.442532	3.11987	1.10058	0.953236	2.02423	0.83624	1.05834	0.483621	1.20249	0.895133	0.928902	0.666907	1.296	1.555	0.854967	0.805151	1.61328	1.43402	0.673145	2.96767	0.874733	0.799588	0.709477	0.875139	0.525388	0.715282	1.25946	0.635673	0.947405	1.35573	0.795469	1.00673	1.51856	1.35607	1.78968
2.98311	0.521862	0.614383	0.607166	0.504733	0.711259	0.789075	0.715966	0.696245	0.666224	1.40437		0.485148	0.326428	0.500245	0.406105	3.01853	1.06086	0.744895	2.11956	0.742178	1.10197	0.486531	1.282	0.795678	0.967527	0.610998	1.36343	1.49465	0.705878	0.770102	1.53313	1.37184	0.621473	2.88896	0.925776	0.742762	0.752822	0.998806	0.617871	0.718481	1.11089	0.554236	1.03158	1.25051	0.825636	0.97768	1.93389	1.43226	1.75659
3.1074	0.508225	0.591322	0.547547	0.508294	0.704459	0.683655	0.669906	0.678619	0.720904	1.62154		0.490552	0.330545	0.529836	0.417418	2.91736	1.31344	0.782228	1.76329	0.706587	1.25907	0.519475	1.33755	0.769222	0.929544	0.571135	1.4722	1.40133	0.636435	0.849142	1.54694	1.31335	0.787101	2.79148	1.01191	0.872365	0.632677	0.754275	0.819934	0.801224	1.0324	0.527758	1.0257	1.3062	0.857252	1.00589	2.12069	1.65877	1.86821
3.2317	0.47528	0.544533	0.52496	0.517318	0.688071	0.706994	0.681055	0.703659	0.76559	1.63147		0.482455	0.356169	0.527908	0.43886	2.61476	1.34275	0.799687	1.72066	0.787171	1.1256	0.501701	1.23791	0.892395	0.805498	0.510846	1.3944	1.39036	0.695003	0.807291	1.56576	1.20366	0.744536	2.40694	0.791058	0.956828	0.68907	0.865121	0.812477	0.796555	0.992104	0.468755	1.03862	1.32109	0.919761	1.18823	2.17344	1.66804	1.68399
3.356	0.445393	0.575962	0.504522	0.658858	0.624056	0.725051	0.7265	0.749569	0.887265	1.75633		0.492957	0.353471	0.547206	0.400529	2.26858	1.22085	0.874286	1.81081	0.820296	1.02487	0.476294	1.16117	0.802952	0.898446	0.503132	1.26577	1.38751	0.700759	0.761629	1.46524	1.16889	0.593217	2.49601	0.849801	0.856832	0.732166	0.991878	0.906032	0.756823	1.00026	0.541476	1.00911	1.34406	0.937681	1.38365	1.96185	1.57589	1.71689
3.48029	0.393386	0.514636	0.533709	0.766949	0.617225	0.710187	0.693567	0.700246	0.830739	1.60108		0.562581	0.331274	0.558317	0.369867	2.18018	1.21895	0.876688	2.07835	0.723765	1.00687	0.47953	1.22919	0.770694	0.906546	0.621684	1.19279	1.23565	0.694001	0.761262	1.56972	1.24558	0.68899	2.46215	0.896546	0.704612	0.698108	0.928976	0.991335	0.850293	1.10909	0.662726	0.925936	1.27664	0.903199	1.56171	1.83748	1.51335	1.58637
3.60459	0.337856	0.541722	0.540351	0.73744	0.644539	0.830545	0.648103	0.784101	0.729523	1.44503		0.545835	0.294136	0.540206	0.344859	2.11408	1.36653	0.671834	2.18833	0.795618	1.03177	0.445282	1.15872	0.811966	0.848644	0.590098	1.22607	1.17484	0.761058	0.708229	1.60678	1.26062	0.686608	2.65671	1.01514	0.634672	0.64999	0.889718	1.04127	1.00966	1.24761	0.693273	0.999924	1.29989	0.85369	1.52771	1.76143	1.41078	1.54943
3.72888	0.358328	0.566093	0.501173	0.762585	0.701703	0.942083	0.583928	0.869407	0.848563	1.26124		0.540932	0.300528	0.555802	0.300949	1.84013	1.1713	0.698308	1.95827	0.790616	1.07987	0.485396	1.12792	0.906841	0.888248	0.703791	1.07938	1.24569	0.771144	0.731292	1.71602	1.34873	0.606346	2.78267	0.849459	0.589082	0.694262	0.842773	0.907295	1.02389	1.31465	0.676442	1.0942	1.29647	0.828103	1.36397	1.56467	1.5522	1.79932
3.85318	0.373627	0.606335	0.513818	0.749414	0.690631	0.823532	0.608296	0.829938	0.940513	1.2553		0.581496	0.321662	0.537575	0.302935	1.55323	1.16201	0.879715	2.07512	0.848346	1.04058	0.579899		1.0306	0.96663	0.756418	1.03592	1.35125	0.879241	0.643462	1.55267	1.41068	0.558322	2.46433	0.751907	0.537639	0.720439	0.791677	0.793118	1.05652	1.36442	0.630811	1.18889	1.27488	0.947448	1.25363	1.66943	1.42853	1.83517
3.97748	0.410718	0.699785	0.480561	0.849177	0.731915	0.798481	0.513994	0.921582	0.911909	1.40134		0.578443	0.352943	0.537553	0.397458	1.5718	1.23742	1.01908	2.101	0.853995	0.835757	0.47353		1.05915	0.961744	0.774204	1.01562	1.35094	0.849834	0.65063	1.68321	1.39445	0.62883	2.0457	0.862408	0.533506	0.723391	0.894676	0.709859	1.10939	1.25291	0.667006	1.21163	1.30271	1.02746	1.08905	1.65586	1.40518	1.88397
4.10177	0.498476	0.715298	0.446421	0.843214	0.767449	0.765902	0.508785	0.914934	0.97747	1.5971		0.544841	0.355831	0.460209	0.354563	1.36154	1.2549	0.878828	1.98995	0.837284	0.898028	0.414722		1.03145	0.787624	0.62514	1.00424	1.30911	0.798928	0.681946	1.73765	1.46471	0.861019	2.08273	0.915308	0.546484	0.730925	0.90122	0.626482	0.946844	1.25163	0.801683	1.15029	1.45447	1.03237	1.12373	1.65911	1.39521	1.75127
4.22607	0.44327	0.608212	0.458102	0.704393	0.692224	0.755028	0.482194	0.894235	1.01543	1.68474		0.479244	0.35655	0.5148	0.349009	1.37768	1.37561	0.828592	1.86318	0.897252	0.898392	0.363507		0.913296	0.834585	0.575307	1.11332	1.26571	0.821623	0.78868	1.62933	1.29674	0.96989	2.21108	0.975506	0.689127	0.755686	0.833273	0.603412	0.858408	1.26293	0.75113	1.11618	1.49536	1.06086	1.09835	1.60629	1.4532	1.69423
4.35036	0.354862	0.563922	0.463456	0.672477	0.728074	0.803652	0.505893	0.951251	1.07911	1.67285		0.462494	0.338326	0.530684	0.350915	1.27445	1.3192	0.808483	1.87924	0.930224	0.883948	0.426346		0.797024	0.801092	0.56823	1.10958	1.24459	0.980159	0.787281	1.56985	1.2435	0.726461	2.03497	0.742794	0.776792	0.812544	0.734871	0.647498	0.823972	1.38318	0.742447	1.20734	1.47113	1.04452	1.1074	1.55285	1.59278	1.8058
4.47466	0.343952	0.540269	0.435099	0.808994	0.707637	0.908169	0.545496	1.03484	1.07561	1.67384		0.458517	0.285706	0.583033	0.307739	1.29575	1.1577	0.874769	1.81337	0.959902	0.807412	0.416366		0.738212	0.862888	0.633198	1.1043	1.30883	1.17565	0.829606	1.54589	1.28808		1.91524	0.676253	0.706324	0.874807	0.61096	0.804696	0.862998	1.45272	0.712407	1.36694	1.41132	1.15396	1.07015	1.42232	1.53065	1.84289
4.59896	0.368551	0.510751	0.407154	0.862528	0.77179	0.922629	0.523176	1.05085	0.975962	1.39686		0.558667	0.268646	0.640578	0.270306	1.65748	1.16663	0.917585	1.73465	0.995224	0.709489	0.532542		0.721591	0.840661	0.712344	0.989983	1.36755	1.03615	0.889603	1.52614	1.25537		2.11577	0.656308	0.586682	0.813816	0.593429	0.724891	1.01243	1.42904	0.664175	1.38077	1.37229	1.09684	1.08486	1.43075	1.50284	1.78331
4.72325	0.375052	0.499823	0.397048	0.929216	0.719307	0.77653	0.519889	0.982796	0.974903	1.47449		0.678386	0.254467	0.541994	0.265376	1.62116	1.08707	0.918003	1.69743	0.9619	0.745744	0.472811		0.763928	0.860559	0.772048	0.943702	1.39376	0.97821	0.716698	1.40953	1.26342		2.18159	0.733256	0.583495	0.784625	0.615985	0.730822	1.01104	1.39485	0.640155	1.47966	1.22603	0.948758	1.17723	1.50889	1.44865	1.64268
4.84755	0.369534	0.509156	0.455564	0.876022	0.759368	0.818582	0.527804	0.901445	0.900996	1.57903		0.644607	0.266131	0.531134	0.267969	1.54883	1.25791	0.999137	1.62676	0.993627	0.769064	0.462591		0.753596	0.942029	0.753445	1.0011	1.35674	0.947597	0.675737	1.363	1.18479		2.46262	0.705632	0.53354	0.740163	0.637064	0.754228	0.995547	1.29825	0.634459	1.35803	1.16575	0.833831	1.19901	1.85045	1.46717	1.71134
4.97185	0.342595	0.519376	0.514314	0.939763	0.817466	0.749339	0.547052	0.803243	0.845261	1.48202		0.642222	0.254221	0.53135	0.341608	1.59876	1.39065	1.00203	1.66217	0.891457	0.828319	0.447711		0.763872	1.00584	0.837708	0.928263	1.31216	1.11854	0.674873	1.27534	1.17634		2.39599	0.753052	0.584774	0.695146	0.603618	0.795193	1.07717	1.22246	0.681837	1.43717	1.24724	0.844371	1.11847	2.07165	1.50194	1.51039
5.09614	0.31344	0.588018	0.575332	1.02975	0.73737	0.757745	0.586983	0.788353	0.846177	1.5017		0.638531	0.231507	0.531809	0.323306	1.52763	1.26337	0.885834	1.70849	0.843616	0.81105	0.471124		0.856202	1.03445	0.869348	0.822489	1.25896	1.18351	0.666783	1.18489	1.16049		2.09442	0.670611	0.665935	0.824522	0.647042	0.845958	1.08412	1.21536	0.692757	1.5381	1.32482	0.851776	1.1091	2.01821	1.48575	1.38441
5.22044	0.310485	0.579196	0.574228	1.27304	0.67527	0.816857	0.555535	0.758099	0.863677	1.43691		0.595163	0.243848	0.569122	0.342707	1.50433	1.29224	0.921639	1.75573	0.792113	0.809011	0.4527		1.01115	1.04604	0.885322	0.839414	1.25907	1.10991	0.711555	1.14791	1.03035		1.96127	0.779443	0.678656	0.97832	0.538494	0.838486	1.0327	1.26165	0.690776	1.63671	1.39814	0.89672	1.14943	1.79991	1.50502	1.36101
5.34473	0.309223	0.577645	0.580555	1.2832	0.682643	0.808882	0.644398	0.84602	0.882476	1.33715		0.579389	0.217311	0.52191	0.32592	1.68872	1.37702	0.898159	1.65025	0.870816	0.809006	0.449746		0.930109	1.0296	0.805959	0.830105	1.3577	1.25292	0.782915	1.14261	0.923753		1.73357	0.89191	0.648654	0.886506	0.520893	0.824049	0.970268	1.26035	0.625622	1.61755	1.35659	0.927478	1.22908	1.59599	1.49236	1.57223
5.46903	0.266899	0.496973	0.605758	1.15039	0.609823	0.849643	0.621738	0.901287	0.937143	1.22624		0.50754	0.23377	0.530966	0.315631	1.76098	1.36105	0.922651	1.68641	0.915516	0.816548	0.379515		0.804961	1.09113	0.709417	0.855535	1.39845	1.26179	0.816338	1.06959	1.04138		1.50819	0.962478	0.575196	0.874683	0.563087	0.894597	0.938456	1.22819	0.600558	1.51106	1.33293	1.05554	1.33574	1.48184	1.4707	1.67343
5.59333	0.237138	0.505362	0.564316	1.09205	0.688253	0.910008	0.621844	0.916505	1.01627	1.27611		0.512515	0.230015	0.508674	0.295573	1.57623	1.36311	0.89001	1.6198	0.911318	0.916391	0.393802		0.792726	1.14701	0.702535	0.91692	1.32825	1.4097	0.801109	1.07863	1.2146		1.32934	0.75452	0.545223	0.834273	0.686148	0.824409	0.936095	1.24589	0.623668	1.59028	1.23916	1.02571	1.30017	1.5203	1.39062	1.50617
5.71762	0.256184	0.492431	0.594338	1.06948	0.673061	0.900907	0.550614	0.900506	0.917618	1.15032		0.430522	0.232025	0.462126	0.320401	1.47914	1.3388	0.889767	1.55178	0.862565	0.940682	0.4916		0.794915	1.07467	0.765355	0.906149	1.2636	1.54949	0.823076	1.10055	1.4043		1.2431	0.762649	0.538482	0.856082	0.770441	0.775503	0.979533	1.24525	0.710961	1.50588	1.27557	1.04422	1.55781	1.67833	1.37714	1.36444
5.84192	0.279833	0.53887	0.565327	1.03188	0.666151	0.930396	0.528721	0.920262	0.847366	0.970081		0.424855	0.219129	0.439136	0.30751	1.48443	1.37915	0.875113	1.71983	0.71114	0.9301	0.450914		0.925437	0.956452	0.813817	0.911093	1.33896	1.53291	0.820364	1.08445	1.24224		1.4961	0.790581	0.585447	0.784133	0.769336	0.812109	1.01134	1.2674	0.777232	1.37052	1.21993	1.04846	1.55609	1.81453	1.41387	1.29037
5.96621	0.274945	0.589486	0.555933	1.24212	0.6818	0.921772	0.536852	0.9044	0.824966	0.962297		0.392005	0.179107	0.398128	0.266522	1.5459	1.36332	0.930533	1.61805	0.711333	0.96992	0.508215		0.88971	0.874793	0.793655	0.87547	1.33813	1.50291	0.884649	0.919662	1.15131		1.55783	0.802397	0.65527	0.773023	0.724507	0.826714	1.07909	1.30342	0.729838	1.4372	1.27964	1.06692	1.52106	1.80637	1.39825	1.33683
6.09051	0.270185	0.58054	0.558445	1.43227	0.75124	0.818279	0.59152	0.896719	0.888725	1.10396		0.405062	0.177645	0.381975	0.277854	1.63163	1.34928	0.918655	1.6279	0.788814	1.02355	0.519108		0.87931	0.839597	0.822352	0.725485	1.30268	1.29615	0.822338	0.782493	1.20205		1.70089	0.787533	0.739653	0.817055	0.754148	0.957311	1.11753	1.49853	0.749466	1.48687	1.21447	1.12388	1.40808	1.70718	1.45639	1.51523
6.21481	0.230488	0.525428	0.52738	1.33542	0.766916	0.876432	0.622966	0.878144	0.963249	1.14981		0.426527	0.172881	0.396096	0.331385	1.6077	1.37197	0.849275	1.70729	0.882612	0.995214	0.61833		0.974289	0.809539	0.799234	0.700395	1.2042	1.39546	0.769054	0.859709	1.15866		1.55001	0.642019	0.716068	0.757579	0.827779	0.957575	1.08409	1.56058	0.700492	1.53071	1.17706	1.17058	1.2812	1.68456	1.37498	1.48944
[truncated: 375 more columns]

## Sheet: Figure 3-source data 3E
D21 siControl	D21 siPCNT	T21 siControl	T21 siPCNT	Q21 siControl	Q21 siPCNT		D21 siControl	D21 siPCNT	T21 siControl	T21 siPCNT	Q21 siControl	Q21 siPCNT		D21 siControl	D21 siPCNT	T21 siControl	T21 siPCNT	Q21 siControl	Q21 siPCNT
0.998291	1.26752	1.13915	0.557007	0.69441	0.533009		0.87822	0.913602	0.959711	1.36195	1.72656	1.65216		1.02956	0.877259	1.20384	0.879494	0.999095	0.781352
0.676129	1.10996	1.27379	0.558955	0.879097	0.702627		0.971884	0.961705	1.05376	1.00849	1.61728	1.83193		0.819815	0.710916	1.43368	0.811552	1.33037	0.717457
1.0199	1.32792	1.06781	0.637502	0.94566	0.630574		0.960091	0.981441	1.10036	1.29083	1.80884	1.43458		0.79935	0.659432	1.73631	0.608453	1.18264	0.993843
1.12845	1.1022	1.37635	0.640478	1.23116	0.78676		1.24209	1.4466	1.24937	1.07365	1.53728	1.85899		0.796565	0.532093	1.31194	0.598822	1.34815	0.639364
0.952088	1.37828	1.21442	0.654479	0.756676	0.595016		0.967144	0.870233	0.999872	1.12706	1.32322	1.28986		1.00791	0.654105	1.26746	0.600835	1.521	0.483168
1.15396	1.73374	1.22051	0.534725	0.896551	0.739044		0.798765	1.01189	0.834797	1.20911	1.41992	1.88614		0.81677	0.753592	1.20948	0.908853	1.3841	0.530287
1.11012	0.983135	1.13451	0.500571	0.896167	0.665451		0.758832	0.7593	0.840784	0.844129	1.54964	2.18633		0.912494	0.880703	1.21533	0.77392	1.13655	1.23144
0.913563	0.964236	1.34822	0.574024	1.31583	0.377166		0.656018	0.696488	1.23056	0.791992	1.50113	1.30937		1.24296	1.17405	1.19239	1.31168	1.3063	0.867278
1.01338	0.957951	1.22127	0.619466	0.798736	0.405085		1.0391	1.03614	0.96346	0.896077	1.60074	1.66698		1.33139	0.482675	1.44463	0.939212	1.13068	0.445028
1.01425	1.45922	0.930211	0.512753	0.795069	0.424824		0.999233	1.09317	1.30574	1.02339	1.57779	1.55744		1.48917	0.673298	1.93886	1.18095	1.12079	1.06858
1.39636	1.26244	1.10168	0.583293	0.929878	0.371428		0.982681	0.729379	0.873147	0.835249	1.35009	1.66698		1.02113	0.766859	1.28199	1.00799	1.3183	0.608193
0.994482	0.896489	1.44443	0.669249	1.15167	0.228299		0.841497	0.86878	1.07055	0.872418	1.44871	1.35831		0.855374	0.65207	1.22788	1.3588	1.25665	0.867278
0.888931	1.23517	1.2763	0.678213	0.798805	0.281684		1.12555	0.667334	0.74747	0.873531	1.2012	1.1071		0.827912	0.856083	1.13993	0.755808	1.24439	0.99471
0.914288	1.41595	1.05634	0.662408	1.16156	0.434448		1.39004	0.701806	0.923058	0.829372	1.38987	1.33668		1.06746	0.718767	1.07074	1.44198	1.42119	0.735593
1.05165	1.11375	2.02204	0.719694	1.13233	0.343603		0.935062	0.641392	0.858709	0.871479	1.36186	1.63344		1.13689	0.840538	1.50581	1.2798	1.67495	0.655337
0.928789	1.11662	1.51749	0.644748	1.13194	0.358442		1.23595	0.701806	1.08386	0.852705	1.14495	1.45832		0.768135	0.635132	1.64745	0.755808	2.28225	0.607998
0.947916	1.14179	1.93909	0.617183	1.13528	0.288598		1.24067	0.93889	1.22514	0.806901	1.35322	1.63064		1.21019	0.797959	1.30967	1.4144	1.29164	0.453897
1.08304	1.14334	1.30868	0.650884	0.79932	0.291355		1.3793	1.20547	1.06763	0.726553	1.54852	1.17755		1.19264	0.766601	1.26408	0.903219	1.53226	0.709418
0.711243	1.35905	1.54515	0.631099	0.791545	0.342408		1.324	1.49212	0.803514	0.758628	1.84469	1.70558		0.813972	1.14096	1.05437	0.911035	1.82993	0.69744
0.792272	0.716908	1.44775	0.624246		0.350748		0.761328	0.726949	0.929649	0.795901	1.44617	1.85319		0.933997	0.905517	1.46604	0.819059	1.61709	1.20932
0.71332	1.19486	1.51518	0.930165		0.347325		1.076	0.910086	0.912234	1.01899	1.7928	1.52197		0.784837	0.948742	1.30967	1.11606	1.30573	0.834717
1.14272	1.34081	1.51027	0.978191		0.254294		1.15465	0.873486	0.975347	1.25653	1.76688	1.32551		1.06432	1.01479	1.24728	1.01933	0.938569	0.972128
1.15868	0.944761	1.51518	0.797931		0.322019		0.800004	1.09916	0.88481	1.2284	1.39448	2.00644		0.95818	0.831605	1.18866	2.01494	1.57653	0.749241
1.16746	0.696202	1.11804	0.617744		0.301171		0.774722	1.15695	0.85558	0.753814	1.34068	1.39606		1.04943	0.726929	1.59907	0.889649	1.17257	0.613935
1.12872	1.16085	1.06022	0.837389		0.292701		0.707165	0.864224	0.915902	0.664753	1.33699	1.18299		1.06955	0.903004	1.00856	0.818599	1.53262	0.749479

## Sheet: Figure 3-source data 3F
D21 siControl	D21 siPCNT	T21 siControl	T21 siPCNT	Q21 siControl	Q21 siPCNT		D21 siControl	D21 siPCNT	T21 siControl	T21 siPCNT	Q21 siControl	Q21 siPCNT		D21 siControl	D21 siPCNT	T21 siControl	T21 siPCNT	Q21 siControl	Q21 siPCNT
1.36744	1.20059	1.2389	0.543452	0.921217	0.444028		0.984934	1.07543	1.00431	1.61422	1.43522	0.845973		0.929806	0.942562	1.45321	1.16101	1.27553	0.970646
0.84582	1.02014	1.36402	0.646924	1.25883	0.632868		0.801471	1.15725	1.45965	1.20972	1.30582	1.1917		0.822991	0.986607	1.77494	1.17453	1.19511	0.901017
1.02565	1.1122	1.12313	0.500252	1.17908	0.513303		0.919485	1.1059	1.55157	1.24202	1.623	1.0407		0.811544	0.958961	1.97763	0.856926	1.15918	1.10403
0.931322	0.81338	1.32607	0.678239	1.29115	0.711646		0.784342	1.55502	1.55389	1.11304	1.45419	1.15596		0.782927	0.966526	1.63722	0.89109	1.32265	0.913018
0.876413	1.08929	1.24286	0.588359	1.00381	0.727409		0.843545	1.06131	1.29417	1.4801	1.36048	1.04625		0.802737	0.800045	1.33991	0.83404	1.30244	0.762705
1.11423	1.26479	1.01413	0.721591	1.66912	0.620011		0.699058	0.999278	1.02641	1.28627	1.41349	1.19584		0.783927	0.986434	1.39174	0.9594	1.21848	0.768248
0.860578	0.732871	1.18323	0.6001	1.73745	0.77322		0.8151	0.946875	1.00689	1.10535	1.31229	0.634867		0.846719	0.976951	1.54025	1.05211	1.32179	1.04879
0.786554	0.794338	1.23697	0.497671	1.4139	0.47277		0.686811	0.926484	1.12696	0.867176	1.45485	0.669679		1.38913	1.0345	1.75048	1.06718	1.2326	0.791869
0.923647	1.06087	1.19963	0.566921	1.09065	0.486054		1.28683	0.866936	1.09465	0.924235	1.53174	1.29225		1.35286	0.654451	1.45181	1.08345	1.25988	0.761735
1.03528	1.15492	0.951439	0.564154	0.852137	0.427214		1.19065	1.1573	1.42413	1.14226	1.38361	1.20375		1.3557	0.98192	2.05756	0.962334	1.20031	0.968118
1.18007	0.86587	1.08218	0.665187	1.17078	0.372489		0.90941	0.853824	1.08386	1.01649	1.37766	1.29225		0.939432	0.914523	1.3749	1.09822	1.23244	1.12045
0.833752	0.902963	1.47802	0.522403	1.17169	0.170483		1.04564	0.948958	1.29343	0.981823	1.28252	1.1194		0.899189	0.937168	1.22964	1.21594	1.14281	0.791869
1.11617	1.64276	1.21139	0.619089	0.843969	0.242252		1.0952	0.803192	1.05607	1.22145	1.17748	0.922439		0.940389	0.954726	1.23807	0.875872	1.27166	1.00069
0.92921	0.97428	1.028	0.501478	1.20151	0.402892		1.10687	0.965075	1.08652	0.944819	1.40707	0.902844		0.878673	0.954095	1.2265	1.46388	1.31651	0.893621
0.968358	0.916686	2.00138	0.855909	1.27539	0.324676		0.810388	0.730866	1.09363	0.916519	1.18571	0.87484		1.51948	1.00093	1.62731	1.41621	1.76111	1.03494
0.818275	0.850207	1.40746	0.636245	1.27948	0.387393		1.10715	0.965075	1.42703	0.919621	1.31885	1.01648		0.996991	0.990527	1.23985	0.875872	1.65694	0.988161
0.962242	0.716416	1.48239	0.493905	1.23254	0.219706		1.12383	1.02771	1.58216	0.819084	1.26154	0.896635		0.930875	0.965593	1.39314	1.19552	1.49441	0.869985
0.92607	0.748157	1.3814	0.79528	1.10355	0.280344		1.2842	1.27558	1.42022	0.902601	1.65999	0.795435		1.00726	1.17179	1.26498	1.31406	1.31935	1.05024
0.802304	0.962555	1.56575	0.566763	0.85202	0.32275		1.44741	1.10322	1.33172	0.970372	1.7238	1.05439		0.830326	1.21832	1.09902	0.986018	1.55297	1.12143
0.708777	0.690489	1.4831	0.492966		0.366181		0.862036	0.807322	1.24794	0.82177	1.40989	1.04274		0.976522	0.958989	1.63011	1.32729	1.30674	1.25666
0.761364	0.894865	1.41483	1.58614		0.300395		1.10841	1.01173	1.25497	0.866419	1.45171	0.948229		0.859567	0.952432	1.39314	1.10044	1.29398	1.10564
1.15905	0.899793	1.38986	0.9568		0.326418		1.10687	0.607999	1.2873	1.02279	1.45404	1.14622		1.11745	1.08556	1.26035	1.13519	1.18094	1.10394
1.09312	0.759194	1.41483	0.746792		0.351858		0.991166	0.858328	1.29043	0.974195	1.23915	1.22502		0.814247	1.35583	1.26764	2.26178	1.4142	1.16415
1.90179	0.537186	0.938808	0.640482		0.383083		0.996579	1.28074	1.29255	0.906689	1.49301	0.877496		0.947073	1.21469	1.24373	1.31496	1.36516	0.966008
1.07252	0.887687		0.964624		0.29483		0.992614	0.911669	1.28981	0.900191	1.49927	0.797297		1.46418	1.02813	1.29198	1.31981	1.81886	0.996098

## Sheet: Fig 3 supp-source data 3A
D21	T21	Q21		D21	T21	Q21		D21	T21	Q21
0.929937	0.775166	0.940092		1.03602	0.832059	0.845654		0.780792	0.883387	0.905003
0.994067	0.80477	0.904156		0.840391	0.967363	0.952913		0.932558	1.36135	0.939759
0.882538	0.796151	0.981013		0.926301	0.916514	0.937212		0.884752	1.08777	0.815895
0.914119	0.877582	0.795255		0.724323	0.666283	0.9662		0.929161	1.57022	0.745834
1.1199	0.882006	0.8491		0.686723	0.976683	0.914249		0.905222	1.38469	0.918384
0.969758	0.869833	0.929329		0.774114	0.92091	0.99267		0.785661	1.0276	0.844803
0.769235	0.809413	0.918445		0.876491	0.909491	1.10564		0.758221	0.940084	0.795179
0.906567	0.877134	0.779973		0.939601	1.26323	1.22496		1.02854	0.964878	0.987533
1.04537	0.81478	0.884326		0.856209	0.662252	1.16159		0.875163	0.941289	1.05079
0.9749	0.925585	0.695403		0.891878	0.861533	1.15985		1.05174	0.971524	0.784973
1.28394	0.912262	1.06916		0.841566	0.751196	0.964225		1.07823	0.907005	0.830041
1.24178	1.15546	0.926121		1.12172	0.836757	1.00925		1.04765	0.923088	0.835365
0.784135	0.995924	0.68799		1.01012	0.783545	0.992959		1.45826	1.03881	0.848074
0.751997	0.975431	0.847647		1.03665	0.64489	1.05848		1.35845	0.867969	0.83417
0.97833	0.971065	0.893178		1.15211	0.715264	0.869163		1.31152	0.881754	0.782389
0.954395	0.844369	0.8657		0.944877	0.85302	0.861724		1.34119	1.07747	0.846108
1.51013	0.934692	1.08313		1.19471	0.790425	0.810945		1.00189	1.34749	0.931893
1.03564	0.855403	0.933294		1.24572	0.829152	0.823692		0.976016	1.42832	1.08028
0.988769	0.888648	1.11393		1.26633	0.81058	1.06137		1.13963	1.27496	0.891963
0.963171	0.973461	1.09297		1.38913	0.76602	0.969243		0.960794	1.21172	0.852503
0.885083	0.938231	0.8992		1.08243	1.219	0.901293		0.869813	1.38197	0.911195
1.01189	0.88028	0.928797		1.08304	1.10618	0.825995		0.909605	1.29896	0.887346
1.04615	1.02436	1.08819		1.04401	1.10858	1.02271		0.802463	1.26239	0.961292
1.16692	0.948038	0.932347		0.977267	0.922041	0.895273		0.886327	1.07811	1.1323
0.891266	0.904375	1.18666		1.05828	0.912836	0.89514		0.926369	1.25054	1.12851

## Sheet: Fig 3 supp-source data 3C
20220616_BLM
Final						Average
D	T	Q			D	1
1	0.856603	0.906372			T	1.01955
20220616_ASW					Q	0.984872
Final
D	T	Q
1	1.27227	1.20481
20220621_BLM
Final
D	T	Q
1	0.929768	0.843437

## Sheet: Fig 3 supp-source data 3D
D21
297.217	176.074	200.961	171.494	292.7	228.608	58.205	107.759	230.245	117.768	261.446	0	111.179	172.537	38.246	71.365	43.228	172.273	36.3454	0	147.783	266.761	226.139	61.175	121.64	150.8	116.897	0	230.158	210.353	0	230.395	163.62	153.243	33.3333	522.676	0	0	104.835	104.958	145.903	80.7903	87.432	0	146.906	151.573	195.859	269.033	90.854	271.182
258.342	191.386	159.524	143.557	190.013	196.608	70.018	83.1961	220.12	103.643	175.259	44.5	95.616	181.974	58.121	101.678	70.603	187.836	74.7829	23.75	119.971	202.573	237.514	62.4875	194.89	135.675	213.897	55.4375	283.721	198.853	15.6875	128.707	173.745	152.68	48.7083	738.363	9.875	40.9375	80.897	135.458	96.153	79.9778	103.432	31.375	75.281	171.948	153.484	244.095	99.354	234.182
130.117	155.824	143.886	146.619	137.375	200.333	106.23	54.5086	152.995	74.018	142.921	93.425	103.554	197.762	78.046	54.19	64.003	187.498	73.3454	28.7	69.633	148.261	166.064	39.7	174.89	90.375	242.722	66.675	259.783	214.303	28.725	103.195	146.22	145.468	52.6333	584.951	15.925	36.025	39.135	153.733	61.878	88.0403	110.207	41.025	57.956	185.048	164.659	195.633	160.729	215.882
88.759	127.741	129.961	98.827	113.242	135.316	180.497	38.2586	72.287	48.893	83.988	88.7917	110.471	149.495	105.746	47.657	93.728	109.273	40.5121	30.2083	64.158	176.636	68.514	12.2583	127.557	92.758	162.439	66.4167	202.991	147.853	19.6667	80.312	158.037	132.785	29.875	333.134	14.458	34.875	26.043	121.125	38.653	73.332	65.765	45.5417	61.823	152.323	191.234	194.658	167.979	277.974
52.467	83.649	149.836	100.169	83.175	46.883	176.98	57.5586	30.095	46.468	42.596	87.825	96.354	111.112	97.546	27.015	129.278	70.548	40.8954	28.8	70.308	259.411	31.414	0	59.24	130.025	67.347	56.8	129.058	108.128	11.9	92.995	143.895	59.843	26.9833	124.576	28.375	51.875	18.46	108.458	9.603	40.6903	43.357	46.75	63.831	133.198	209.534	207.158	56.804	210.907
29.161	67.074	128.447	89.619	53.353	13.261	155.358	65.8419	20.995	34.712	26.127	68.625	51.443	108.69	76.885	27.684	60.964	15.648	44.6787	44.1111	75.422	240.344	44.625	25.1889	49.196	137.008	52.633	76.5694	70.394	158.742	19.4028	95.062	169.009	48.729	60.1666	35.218	31.958	41.3194	14.696	97.861	0	29.8181	23.335	56.2639	59.628	87.059	212.526	194.783	9.507	79.293
21.738	47.72	95.919	58.307	30.929	9.733	41.955	70.6336	12.037	30.351	7.946	55.6042	16.971	94.537	84.017	24.99	37.374	30.044	65.3246	44.3958	55.45	146.407	44.806	35.8	39.14	89.758	45.626	51.9375	62.554	130.52	14.2708	70.562	185.245	31.556	79.4166	21.884	43.708	61.5833	18.127	75.145	0.716	29.7486	10.328	53.5	48.573	71.51	129.484	195.825	0	35.265
29.806	33.824	71.354	19.173	13.004	32.465	43.491	61.0443	12.816	13.054	0	62.9464	2.75	48.323	134.782	49.847	18.157	37.166	79.4347	48.5714	62.497	61.957	37.496	31.9071	38.694	41.514	22.254	32.8571	61.319	98.317	25.5893	59.127	140.334	29.047	68.9404	8.069	46.804	59.7143	27.442	45.047	24.742	25.2546	29.432	60.1964	51.049	44.073	56.913	103.462	11.443	23.361
20.056	12.806	50.265	7.762	32.289	48.126	30.669	57.8479	12.924	0	15.25	57.6964	0	22.805	89.621	53.419	0.621	56.237	64.2918	59.375	73.944	44.065	45.371	32.7821	4.854	20.282	21.468	9.4643	40.301	90.442	35.7679	47.377	102.566	22.386	43.5833	13.14	47.768	55.3929	40.764	31.744	39.189	26.6117	39.432	51.0357	50.585	30.698	54.734	70.354	5.211	17.307
15.658	0	42.895	7.678	46.722	30.704	32.08	47.4645	18.539	10.4	29.189	45.9485	12.289	13.603	71.775	44.034	0	22.957	64.5954	62.0294	62.459	23.482	35.382	22.4471	8.758	3.896	39.287	10.9485	29.577	77.279	17.1691	42.204	87.385	16.721	36.7009	20.08	54.625	62.6103	49.953	33.392	43.704	24.6874	43.395	42.875	47.921	30.963	51.124	62.915	12.935	19.079
7.561	2.105	54.274	13.478	22.575	7.202	32.658	18.4617	19.839	14.034	41.259	30.1094	18.648	18.084	49.574	20.099	4.431	2.617	66.0016	69.3438	64.908	4.808	41.014	33.9406	21.328	8.987	32.288	32.4375	35.283	81.884	5.7656	54.176	61.229	20.977	38.5052	20.082	57.781	69.0469	64.335	33.583	20.294	33.1497	49.963	30.6562	36.094	36.792	45.89	50.064	28.62	15.276
0.242	13.224	39.524	8.107	26.863	6.071	11.705	24.5836	30.358	15.506	40.059	21.7875	12.129	0	46.171	11.29	21.003	7.523	58.4204	64.625	75.67	8.449	36.539	41.3875	24.515	14.087	14.547	31.825	26.783	73.353	19.475	57.133	77.558	12.056	35.6083	44.151	67.925	68.3375	54.472	16.495	22.141	57.7778	50.144	19.725	30.319	33.573	17.384	49.771	52.092	4.145
0	7.357	23.575	26.869	15.738	16.461	6.2	24.1934	44.245	12.964	33.658	27.6902	12.358	15.477	44.289	6.751	38.82	9.735	42.291	57.8261	55.5	11.044	30.938	36.3217	14.401	17.751	17.022	18.538	18.511	75.864	39.5706	46.493	91.457	10.357	48.5616	13.888	83.516	69.7989	47.02	16.572	13.702	48.2359	40.177	31.6467	40.645	30.611	0	52.642	67.283	1.812
10.751	5.426	25.95	45.244	8.189	10.131	0	20.4859	18.95	13.711	30.446	35.0455	11.724	20.901	30.916	12.206	53.444	7.375	54.1977	52.5795	34.647	0	23.719	28.2659	13.924	24.345	14.499	23.8409	7.431	70.592	25.0455	27.452	71.075	25.504	54.3674	11.551	74.682	67.2614	63.335	21.128	15.426	43.5744	30.307	37.5227	41.917	28.357	9.541	58.851	38.149	0
21.946	5.543	27.19	35.192	11.783	19.983	18.747	21.4982	24.964	12.591	31.988	43.9792	24.492	29.85	13.402	1.99	48.53	7.992	44.1683	57.375	33.262	12.053	18.618	42.5917	16.15	15.706	3.897	31.375	7.543	67.77	25.25	21.197	67.026	20.524	42.5312	27.301	92.073	62.4479	53.377	12.385	6.809	40.0611	14.703	28.7604	36.729	11.615	9.244	43.575	35.541	5.453
29.196	12.053	40.971	45.39	22.377	7.306	26.747	28.4878	33.974	13.403	42.581	41.4792	24.2	32.443	22.558	0	57.947	13.627	34.4287	63.4167	22.45	7.167	21.326	49.6229	15.244	10.737	2.907	29.25	8.377	53.343	40.2083	23.551	55.943	20.951	25.3645	36.551	86.563	76.6667	56.71	0	18.268	37.6861	2.88	28.5417	31.333	0	34.401	36.231	29.281	19.932
43.674	12.246	54.293	39.102	29.127	4.802	31.356	27.5689	29.073	4.07	52.545	47.8491	28.313	36.74	17.375	9.524	48.862	24.622	35.8195	58.0948	12.274	17.649	33.669	38.5672	21.312	5.278	21.556	40.2715	8.119	56.431	54.194	26.231	72.887	14.799	27.4109	27.62	87.056	91.6078	55.757	1.333	31.114	30.2127	9.376	19.6078	32.087	10.922	50.704	18.869	24.513	19.777
50.075	8.291	40.803	46.819	36.167	0	24.738	17.6586	24.803	16.46	49.304	55.8833	22.946	35.495	17.663	24.215	51.07	23.44	37.5537	63.4833	19.3	25.444	34.847	44.7417	21.723	2.083	27.639	35.6833	3.45	55.928	49.6333	34.328	61.078	28.168	31.6333	25.026	91.658	87.1417	46.51	2.766	32.386	11.9736	13.657	29.5583	45.048	11.056	57.276	14.758	24.179	20.965
42.475	13.491	20.778	52.019	24.85	5.908	27.938	9.5669	12.453	19.885	47.138	43.3917	14.087	26.329	14.513	34.632	57.836	36.648	32.7871	58.6167	23.591	47.994	32.222	36.4917	16.465	2.708	28.222	49.6167	0	44.678	46.4083	19.52	56.887	14.718	6.3666	17.084	89.508	83.275	37.968	5.616	55.028	5.5236	12.607	20.8667	40.006	15.306	29.242	10.375	27.262	26.449
40.58	19.727	23.489	55.304	20.857	7.894	9.814	17.8231	19.93	21.107	61.773	41.6573	21.296	31.436	3.859	19.571	48.022	46.398	29.6922	54.4677	29.041	67.906	22.764	39.0339	19.067	4.344	12.611	42.6089	2.372	49.28	34.7702	15.839	64.975	8.376	0.8252	13.253	91.754	95.3185	33.94	11.994	48.875	0	11.484	21.8266	37.979	39.093	20.165	21.396	27.229	34.617
38.036	28.699	21.079	52.584	19.019	5.962	10.018	19.0503	8.842	17.407	50.099	30.5278	16.887	43.808	0.031	18.907	59.874	35.252	44.7621	59.4028	30.561	45.928	13.958	40.0153	12.841	10.647	2.453	32.0903	7.29	57.471	42.0903	11.173	65.412	0.479	0	14.252	100.507	84.9653	40.536	36.208	41.993	7.5542	4.106	20.9653	35.968	56.837	27.297	27.88	19.333	37.057
25.761	27.523	18.417	37.347	31.656	9.093	17.073	30.2807	8.863	13.29	45.821	18.1029	18.091	36.265	10.378	21.534	50.331	19.876	53.6469	56.3309	12.687	40.614	19.154	40.6235	15.39	20.543	0	27.6838	6.055	44.978	47.6397	16.91	41.899	2.052	6.7157	4.647	120.14	83.2794	37.328	47.818	49.153	12.6727	8.028	20.7279	31.193	46.845	44.506	35.114	22.06	30.991
26.081	32.417	11.372	16.333	44.282	9.169	5.359	40.9586	13.445	26.497	37.721	16.4107	30.954	32.912	17.203	50.011	24.953	13.812	52.9883	45.1429	0.069	40.397	29.064	28.6786	11.947	19.225	8.329	39.5536	3.019	30.153	56.8179	27.174	46.327	7.225	16.7547	2.251	118.861	72.7679	34.949	32.054	44.592	2.8974	0	29.675	35.277	20.605	32.395	40.069	27.222	25.282
32.697	34.337	18.744	22.323	32.786	13.667	13.363	42.2849	21.074	32.781	32.617	18.3355	37.291	30.241	15.97	45.299	25.248	2.234	70.8257	41.4605	1.197	43.616	23.461	30.8395	8.12	8.616	16.897	37.4803	4.408	18.906	57.0066	19.566	31.192	11.171	19.2346	2.025	114.178	79.25	34.118	7.162	51.482	10.1587	5.445	19.1711	32.531	16.606	32.51	36.829	12.525	24.3
27.663	35.973	22.401	20.44	14.652	6.929	24.253	49.8122	32.025	44.31	33.488	27.125	40.155	28.227	23.788	41.3	37.811	6.999	67.8394	34.25	15.86	32.88	27.24	26.3179	3.485	9.276	21.707	38.125	13.533	8.603	55.625	18.389	32.269	16.451	17.3154	2.831	101.702	71.9167	29.043	7.809	48.046	12.0165	15.926	20.1845	34.424	20.424	24.728	32.598	4.729	26.021
28.978	30.279	6.728	9.926	8.655	4.551	39.716	32.7756	20.046	34.899	38.878	40.0966	39.866	31.35	33.053	26.462	45.779	5.313	55.6579	42.9716	14.607	23.119	19.287	23.2375	7.862	8.675	20.158	35.5227	15.419	10.739	59.4773	6.707	35.734	23.351	20.481	10.602	89.199	59.0511	30.528	19.867	49.051	33.7164	7.574	18.0682	35.02	15.618	27.916	19.05	1.559	27.057
28.4	38.391	12.769	22.284	0.026	11.251	35.348	16.8745	15.086	28.073	39.034	32.5518	42.987	27.546	36.953	23.752	39.493	16.642	50.9186	43.4939	29.289	21.377	20.435	32.6537	17.018	14.821	24.644	36.5396	14.789	14.688	57.3689	1.657	44.955	21.209	21.376	16.612	86.96	58.9482	32.506	21.827	52.802	36.1013	13.081	20.5396	26.888	15.076	30.676	13.777	0.729	24.694
32.817	43.896	22.558	28.419	6.681	13.822	26.591	13.203	6.989	26.34	43.171	31.875	38.343	21.64	33.574	24.473	42.559	15.526	50.1065	32.3167	35.872	30.661	22.614	27.2444	20.796	14.569	36.055	44.6028	17.396	8.865	60.1583	12.789	38.053	13.335	20.3833	14.89	87.975	53.9881	23.591	12.027	58.406	24.5125	15.524	18.4972	21.35	14.037	37.809	9.911	5.273	23.654
29.756	60.557	20.28	28.847	12.936	23.394	33.886	18.0753	7.667	26.385	39.349	25.8083	34.376	25.162	16.996	27.207	58.259	17.604	58.9843	22.1944	35.4	31.372	32.725	28.2167	10.54	12.914	35.933	45.7694	16.424	9.067	54.1083	1.167	37.331	6.646	15.5222	12.779	93.742	43.9115	19.658	1.583	57.7	19.1903	7.757	32.025	18.373	10.854	36.787	12.227	6.701	24.76
29.781	71.223	20.113	34.651	14.384	19.797	41.176	16.0778	5.367	21.694	46.204	20.0186	36.458	27.758	12.693	22.054	45.784	21.457	51.9146	9.9309	19.357	33.117	32.424	30.7574	11.475	18.521	30.905	33.3378	17.905	23.433	50.9495	7.645	30.689	7.581	19.6046	3.205	106.843	29.9654	24.947	0.248	56.762	12.9977	9.084	43.5133	10.321	10.092	44.354	7.155	9.803	26.496
34.602	87.641	11.831	25.273	9.984	19.661	34.945	15.5471	10.856	17.874	58.97	12.8798	35.102	29.532	13.558	34.105	61.3	24.595	42.2348	14.9135	24.557	30.823	19.812	38.0308	10.428	13.834	27.623	35.3462	13.557	27.502	45.6923	5.26	32.793	4.18	30.7179	1.7	98.615	21.6827	33.503	6.256	51.687	22.747	13.701	47.6683	16.805	14.592	35.96	4.951	13.907	28.182
25.367	88.434	10.876	7.364	0	10.803	27.73	13.9636	0	18.793	44.971	13.6	38.984	22.807	13.371	43.545	48.483	29.243	28.6454	15.96	22.473	35.146	18.134	32.335	13.985	12.575	27.332	44.16	9.408	16.483	50.275	7	31.945	8.453	34.3783	14.011	108.5	26.6	25.48	6.378	49.728	22.3253	15.797	53.725	16.071	12.363	24.089	9.288	8.369	27.132
28.246	75.814	14.043	7.845	13.325	20.81	36.743	15.0567	0.043	13.561	43.167	20.7933	40.9	19.912	12.405	42.346	36.271	16.96	15.5954	22.5577	13.538	23.636	16.778	28.4635	9.078	13.483	30.176	46.6298	6.773	23.319	43.8798	3.366	11.399	11.599	33.5593	24.32	96.668	28.4038	21.224	1.045	47.398	21.2711	21.975	65.0769	21.473	9.386	14.258	8.769	21.993	25.72
29.792	54.118	17.612	9.286	22.711	25.518	33.944	7.8814	2.841	9.957	29.917	32.568	41.545	23.469	12.531	29.652	30.651	10.937	13.0296	15.8947	6.608	15.064	9.931	29.9272	11.25	11.407	19.452	51.0197	18.568	17.103	48.5329	20.465	4.225	12.302	19.8772	20.661	96.862	37.875	16.129	7.824	44.107	18.3298	9.877	68.5417	18.682	9.391	15.434	4.068	30.997	32.02
38.755	54.223	10.009	7.451	33.527	31.012	28.489	4.6673	8.654	15.508	32.028	42.8462	47.429	28.2	12.784	32.615	31.238	17.287	21.8454	15.625	2.403	12.761	0	33.7038	15.116	11.305	15.609	48.9615	18.749	5.137	52.6923	30.751	0	15.147	20.867	18.128	90.736	43.476	11.508	19.15	40.937	22.3432	12.576	69.4663	12.021	22.756	17.277	7.946	29.541	30.98
33.208	58.906	3.064	8.727	28.786	38.505	20.046	0	4.874	16.393	31.782	47.569	49.558	28.287	21.651	22.697	27.702	17.622	22.1385	28.6035	8.77	14.464	5.01	40.8431	2.972	8.766	12.569	53.9785	12.464	0	50.7629	15.606	6.646	2.657	32.8333	11.581	84.914	27.4138	6.632	17.531	36.42	19.5877	18.484	88.0172	4.462	27.077	11.243	19.361	27.945	36.639
34.27	58.013	0.13	16.185	15.009	34.439	42.633	5.2586	8.6	19.479	25.725	38.1513	50.865	27.846	23.676	20.744	29.537	13.99	23.341	25.1623	4.735	19.713	10.137	50.8	0	8.552	7.013	58.8794	18.752	6.028	44.6425	7.913	6.317	0	37.0745	12.231	84.112	27.432	4.41	11.289	51.791	23.764	14.605	76.0899	2.717	18.189	8.846	20.752	22.102	38.941
34.369	57.41	0	7.01	10.587	45.53	41.389	15.8758	10.081	17.928	26.985	30.6758	45.214	33.197	15.125	24.724	30.33	10.48	20.1931	27.9062	6.775	22.718	9.084	51.2609	8.456	8.601	4.893	51.1602	24.963	6.794	49.9023	15.297	0.339	7.43	34.3099	8.274	77.691	27.3477	6.823	6.61	67.602	27.8294	13.123	71.5391	0	16.522	20.695	23.388	21.956	35.26
37.169	51.243	8.517	14.288	7.184	46.362	37.04	26.1659	14.338	22.195	29.212	40.6976	35.155	37.843	4.734	35.559	25.732	6.277	15.4785	19.5444	16.126	28.39	8.437	47.6185	23.624	8.836	2.941	37.8105	25.932	5.362	60.7218	16.605	12.854	13.912	27.5389	23.696	74.552	18.3548	0.379	12.869	66.697	26.8024	7.17	63.3952	2.1	9.021	22.161	15.001	15.298	30.275
48.302	57.434	5.633	22.064	11.139	68.669	36.86	24.373	7.41	26.353	24.707	43.7733	43.529	38.331	2.788	36.753	18.925	11.034	25.0954	12.7458	15.397	34.943	10.565	49.9568	17.746	8.213	8.386	31.2818	23.758	15.486	63.9174	23.759	34.51	9.046	29.6596	29.191	85.345	11.9979	0	20.138	66.041	27.1801	20.087	47.7818	12.91	19.584	15.325	9.711	14.132	29.118
48.68	61.787	8.428	16.082	21.376	57.994	33.404	13.4939	6.271	23.125	25.328	39.614	33.958	42.813	0	29.214	25.235	8.188	16.6726	11.375	13.526	38.585	4.444	48.3515	14.022	10.896	10.327	34.0147			61.5993	12.921	28.44	15.206	26.8112	29.018	82.221			29.851	54.113	21.3454	28.528	50.6618	14.586	34.834	11.543	0	22.795	28.208
50.338	69.953	23.624	18.748	18.064	44.475	36.519	16.1374	8.321	20.673	23.806	48.3447	43.592	35.518	4.613	31.907	26.034	0	2.8151	13.5871	10.476	29.818	9.938	44.0879	19.564	11.084	7.344	41.053			56.7083	4.577	35.184	26.133	36.9166	30.362	88.572			39.882	52.092	13.2638	23.58	51.4697	20.944	47.103	9.022	5.109	18.668	37.818
45.415	69.64	31.089	19.442	21.283	39.243	51.653	7.7482	1.46	19.969	27.543	56.6458	43.228	33.534	3.01	27.719	26.241	1.457	3.7829	12.3403	6.925	31.889	9.531	35.1819	12.105	9.477	15.091	55.6076			35.5	9.992	42.922	17.892	22.9652	31.193	91.507			42.798	49.75	10.5438	19.255	48.5833	18.17	47.858	10.06	10.526	20.062	33.689
47.449	70.06	44.456	11.358	24.503	35.57	49.609	4.1934	4.615	21.268	34.716	55.183	45.565	33.365	7.402	32.986	25.177	11.456	2.2548	5.3116	0	22.04	5.945	35.387	16.386	8.762	21.536	54.1467			35.0924	14.018	35.859	18.056	23.4275	25.399	99.44			42.5	52.959	10.4932	22.133	44.0489	15.721	47.256	8.946	17.703	19.001	26.577
40.93	68.21	39.575	5.299	15.755	35.248	57.756	10.9204	3.723	16.816	32.38	51.4485	33.201	36.486	11.033	27.777	26.201	16.391	10.191	4.0478	4.831	19.125	3.117	43.8	30.335	4.315	29.588	58.0772			45.5699	7.505	28.874	22.574	22.5502	19.79	95.195			30.351	53.962	7.3712	26.737	49.1581	17.193	37.055	13.102	15.456	16.637	26.263
30.595	73.189	42.738	3.477	19.22	35.311	60.364	23.5221	11.434	16.086	36.767	50.1216	27.155	28.182	9.462	31.162	28.988	19.026	17.1292	13.9122	11.817	33.312	8.889	51.3574	24.89	2.003	36.816	62.5811			39.7095	0	25.11	23.912	19.884	10.953	83.784			32.843	55.079	9.5538	34.094	46.5946	16.325	33.299	22.298	16.205	19.702	29.527
35.159	70.749	46.137	2.372	14.739	51.01	67.148	29.9538	10.54	21.371	30.722	54.5086	33.52	26.443	6.01	41.552	16.231	15.193	12.1433	14.1849	7.256	28.97	14.788	55.3377	31.339	0	27.18	63.0394			42.2825	16.638	14.784	23.478	16.3949	13.756	76.837			27.08	46.87	5.4239	26.769	57.7449	15.433	35.301	34.791	18.965	16.085	27.566
42.387	73.459	55.634	0	25.242	59.621	66.657	25.2682	11.729	24.252	30.952	48.6923	33.435	25.883	8.012	44.064	24.923	14.225	3.4768	13.0032	1.857	29.896	7.995	54.9923	27.912	3.444	23.541	59.6506			59.1603	14.949	8.931	29.634	17.0384	16.394	77.814			24.343	52.3	5.8544	22.307	56.4359	10.541	30.551	31.712	17.991	16.816	32.217
41.381	71.442	62.935	5.494	21.427	61.74	58.041	20.7356	8.834	25.88	32.9	47.1053	35.413	31.419	4.404	45.543	19.892	10.395	0	12.9309	7.263	22.735	7.412	58.4974	33.015	5.708	19.334	52.4145			68.5724	16.339	6.61	25.842	19.0997	10.959	81.918			32.724	49.288	0.2475	27.11	56.1217	3.682	33.057	29.004	18.625	24.14	27.814
28.919	70.169	58.431	11.253	25.057	51.349	33.589	15.7646	9.087	22.188	29.821	48.2887	33.274	28.305	0.776	46.13	24.861	6.455	2.6103	15.0595	0.601	19.05	6.925	65.547	22.348	10.121	23.451	53.2679			66.1369	1.077	14.028	20.826	17.8958	0	82.146			35.645	46.108	4.7784	28.149	53.1042	7.742	38.266	24.198	11.938	18.158	20.06
T21
50.2778	247.076	842.942	19.055	46.6875	74.625	80.1364	49.2278	1391.21	2021.65	96.625	16.2368	9.3281	58.9205	0	34.3173	177.183	5.7857	39.1136	27.4706	26.1463	131.65	166.908	3.875	70.457	108.559	67.0119	130.071	69.475	383.169	77.184	35.2639	0	169.962	25.2812	159.568	21.625	102.205	270.036	87.5086	84.1875	115.686	36.9348	38.3021	49.6983	31.9125	12.9732	61.8152	73.25	40.9924
24.7153	198.576	938.442	48.055	38.4375	86.25	83.7614	81.6028	957.148	1263.71	69.1875	15.3618	12.8906	53.608	4	15.7548	219.308	21.5982	58.4261	37.5956	63.3338	95.525	119.408	4.0625	113.019	57.247	59.2619	70.071	98.7875	217.482	108.872	43.0139	0.9375	155.587	15.8437	131.505	0	88.393	172.286	54.0086	56.8125	141.936	80.1223	20.4896	85.9483	20.35	18.7857	111.815	68.875	51.0549
25.0778	155.376	565.267	60.43	23.4625	76.4	32.6114	86.1278	545.586	605.074	69	9.4618	13.9531	69.0955	6.6	13.6673	120.883	29.6857	58.4886	31.3206	98.0463	39.775	115.758	0	76.507	37.559	63.4869	71.296	75.825	163.244	63.334	14.8889	25.4	128.987	12.4312	133.543	12.375	93.155	158.411	48.1086	60.3625	125.111	73.3348	3.5771	98.1483	9.5125	44.8232	77.5652	75.75	37.7424
41.8611	81.326	218.984	50.6383	22.6042	52.6667	5.8447	58.2278	273.003	272.232	56.5	11.3201	25.7448	38.3372	7.9167	45.3173	55.683	11.494	45.6969	17.3039	91.7296	17.067	123.658	6.2083	70.207	32.601	73.0536	50.071	58.475	114.127	38.976	17.5556	26.75	97.129	1.4895	124.693	28.8333	101.538	171.578	53.7586	44.3542	75.478	40.6431	9.8854	80.865	7.5792	58.8482	55.3569	90.125	34.9507
44.0528	56.126	120.292	33.255	21.0625	44.5	12.3364	24.4028	146.786	121.799	29.075	10.2118	14.2281	29.9205	11.225	45.3673	38.858	19.8357	33.8386	15.0206	46.8713	0	93.708	27.25	63.057	102.059	53.6619	46.596	56.75	60.044	22.259	9.7139	47.3	88.262	0.4062	85.593	23.825	89.43	169.411	75.0086	36.8875	31.336	23.9598	29.7521	37.3483	11.0875	43.4482	29.7402	47.775	44.1674
29.2778	50.243	54.261	30.93	9.7014	26.4444	27.9836	6.7278	101.336	64.052	17.6111	25.8618	42.4253	24.5455	27.8056	40.0673	31.183	18.0357	26.3219	7.5539	26.2019	6.553	57.88	29.1389	57.735	121.837	46.5813	32.029	60.0583	32.85	25.517	0	45.7222	73.698	8.1701	70.887	17.6806	89.066	74.939	77.8697	44.8125	23.7	12.2959	23.5938	12.6427	19.1903	45.2232	31.5652	27.8889	36.1313
29.1945	55.347	39.005	22.43	10.9792	32.1667	28.5114	9.4986	64.211	36.024	10.8542	23.3826	58.8489	13.1705	29.9792	50.4006	30.308	14.5982	14.0094	12.6789	17.1255	19.629	43.72	29.8125	45.353	71.851	32.0744	8.404	33.8292	27.961	13.392	9.8264	33.9375	38.004	11.7187	62.797	10.7083	72.309	38.828	38.1336	26.8333	22.103	27.0181	8.2604	6.7608	40.7458	55.369	8.1902	37.875	29.6799
18.8849	45.058	21.638	13.6443	9.0982	28.75	16.2257	15.4599	35.211	27.06	11.8393	22.5404	58.5424	16.2062	43.6429	54.1387	20.201	11.3036	10.2029	20.5956	4.307	15.596	37.479	16.1429	31.796	35.22	29.244	5.767	11.7071	12.544	7.988	14.0496	42.4107	18.087	8.7455	41.014	2.5179	69.205	2.982	22.7943	17.5982	10.99	33.0955	22.32	16.4126	28.1089	57.7053	10.4581	29.5357	50.9745
25.9207	38.808	25.621	15.93	10.6696	23.7321	10.7078	8.4242	27.515	31.953	14.4821	10.7904	47.9531	1.1348	47.75	46.728	12.897	0	4.4172	9.542	10.6463	26.489	25.247	18.9107	35.011	25.559	24.8155	14.571	0.1	4.705	16.952	17.3353	56.9821	15.801	3.7455	36.282	1.4643	49.348	0	24.4729	18.8482	5.882	29.0062	24.4271	25.7697	10.7161	46.1875	21.3688	5.8571	56.2781
21.0866	26.767	25.758	13.9594	7.0331	16.3088	17.3349	21.3454	21.336	32.892	25.0588	5.5677	60.9678	0.0455	62.1765	24.4497	7.359	4.5357	2.5768	0	6.2492	44.349	13.629	13.8676	33.751	15.059	34.4751	11.681	10.5632	0	14.493	9.933	56.6471	13.749	0.6047	33.664	14.2279	24.837	12.47	38.6557	9.739	19.429	16.9789	21.2947	33.9777	9.0449	34.7673	43.2417	10.7206	37.6836
22.7153	21.857	20.551	15.9144	4.9687	21.1875	13.4333	30.3372	19.414	31.29	30.4375	5.0493	57.8593	7.858	56.8594	28.7861	10.074	6.5826	2.7855	1.5644	9.4119	43.713	9.689	6.7344	22.863	17.028	44.4338	10.008	9.35	13.044	9.778	3.1701	52.5312	13.212	4.0156	16.615	20.9375	13.846	13.145	34.9461	0	25.655	7.2629	20.5521	26.8077	6.5219	36.8482	25.2996	0	24.7112
13.2528	23.014	17.867	14.4925	0	12.2625	1.4239	16.8903	31.373	20.849	13.4	8.8743	40.5031	2.9955	40.1875	13.3423	5.495	11.9232	8.2511	1.1206	10.4463	43	1.158	10.0625	9.132	28.571	37.8994	2.746	14.1875	5.519	5.721	11.3264	39.475	10.112	5.0562	6.493	17.7	23.092	11.286	37.3673	11.9875	17.086	2.6598	15.7021	19.6983	0	35.0107	12.6277	4.125	36.2799
9.4735	17.054	7.774	12.1691	20.8016	12.6739	4.0984	9.9669	18.293	17.198	16.1304	17.014	28.2792	6.9585	29.6304	20.4043	16.563	20.6661	6.1843	5.6445	14.1028	38.742	8.028	12.7935	0	17.113	38.5608	0	14.5511	4.066	13.238	16.4106	40.9674	11.087	7.7269	6.508	9.0489	23.575	18.9	17.7711	10.8016	10.735	0	14.0901	9.5461	5.9451	36.7667	0	3.3152	38.688
11.1642	16.769	20.453	14.0777	26.5057	12.6705	0	22.421	12.484	14.433	0	12.9982	28.8395	0	21.6705	24.5105	23.308	15.2857	0	7.5729	10.5781	34.036	6.203	10.2273	1.059	14.945	17.3074	2.31	16.1227	6.033	22.173	23.7071	33.6364	13.564	6.2698	0	15	35.535	24.081	8.7359	7.0739	12.334	2.6507	4.3248	1.1528	19.2648	31.2118	2.1334	3.0341	23.8788
16.7361	9.284	17.359	10.9196	24.1042	20.6979	11.876	18.2799	6.065	19.43	5.6562	9.7889	25.5364	4.6184	23.8333	26.5777	13.068	22.0982	8.8636	19.7623	11.7817	34.806	8.658	10.4271	6.499	12.403	15.5431	18.967	14.1521	11.898	19.049	38.3264	28.2083	17.327	1.677	6.891	13.9479	27.559	12.869	7.5294	7.2083	9.853	16.3723	0	5.6775	17.0271	32.0774	12.8256	9.6875	30.3257
17.7986	6.701	13.536	5.4612	16.4792	19.0104	13.9176	19.1445	1.315	25.816	14.8542	7.0493	20.6927	11.2955	29.5625	25.234	9.381	10.9419	14.1761	12.3664	9.0838	40.39	11.71	10.0729	16.519	22.007	7.0952	21.665	6.4229	8.398	10.132	30.2951	29.3854	16.764	0	21.453	3.9167	23.965	19.473	1.0919	4.7604	16.582	19.8723	5.9167	0.0837	7.4854	40.9524	3.2735	12.8333	25.7632
26.8295	18.274	18.455	9.5162	14.9418	19.3966	12.1838	35.314	0	28.015	15.3793	8.4221	21.0134	6.3558	26.2845	17.2397	7.83	10.3805	7.592	9.5223	12.4566	44.663	16.244	8.3793	13.431	15.162	7.6714	30.868	4.2164	5.553	5.218	16.2423	36.6638	16.863	5.7984	32.348	11.3578	9.714	8.445	0	3.4849	24.509	24.6934	13.2288	0	7.6539	42.7749	6.3755	8.819	25.0959
23.3361	16.984	29.159	9.18	17.8042	22.825	17.2947	28.1195	2.953	27.032	12.95	8.3118	20.3948	4.2455	17.875	21.8423	3.691	9.6857	7.8053	14.8373	17.6546	33.617	9.558	10.5417	19.24	12.559	13.1036	22.521	5.2833	2.994	9.526	12.8222	33.5667	9.654	6.5729	28.96	6.8917	8.93	11.628	3.7503	6.8292	14.369	23.3681	7.8271	2.8066	3.1958	34.0399	5.8069	12.05	34.7341
22.9611	24.151	18.459	4.855	12.9042	31.15	16.4364	18.2028	4.036	29.799	9.0333	7.1701	13.2948	0.5955	23.625	18.234	8.758	22.219	12.3303	10.6623	8.4296	30.458	9.066	10.7083	25.465	20.134	11.6286	21.004	0	9.661	8.584	18.1639	39.225	9.104	2.4895	27.901	2.1833	20.497	6.811	4.6503	7.8708	19.853	25.2015	4.9188	1.3316	11.2292	28.7399	9.5235	25.4167	30.0757
20.9149	21.27	10.39	11.3736	14.5544	26.75	11.0275	15.9939	5.401	27.911	10.2258	8.4828	16.3725	3.86	26.7742	15.5915	8.949	18.076	14.8112	15.6158	3.3318	29.38	5.763	12.4274	24.191	14.833	3.3466	22.583	2.4024	18.681	10.353	23.9292	39.0242	10.45	3.2812	22.669	8.2702	26.479	4.798	10.2909	22.4335	18.666	26.8703	11.0158	4.4644	17.6544	25.7474	17.2588	29.5403	28.6456
14.8334	24.007	13.379	24.8258	17.4583	21.0208	13.5114	17.5403	10.225	24.225	16.7431	5.4243	18.0712	10.1774	27.9236	13.4423	6.759	23.4663	7.6553	11.7623	4.9866	25.136	10.575	19.3681	25.901	13.059	0.5258	23.404	9.3847	11.572	5.587	24.4861	30.4583	14.073	1.7812	17.471	4.375	17.323	14.369	10.0919	33.1319	19.964	22.782	14.3021	9.4344	11.2875	23.3829	16.1416	23.7986	29.4924
3.7631	15.135	12.618	27.2976	23.5184	13.5368	23.2614	19.8969	4.387	27.48	17.6324	2.0824	24.4825	17.4205	30.3824	8.9423	7.918	22.8445	0.6136	16.728	5.2272	26.893	5.349	22.6029	19.685	9.633	2.6663	26.983	24.7471	7.956	16.691	23.2565	24.7941	15.028	0.1415	25.936	6.4853	30.102	10.19	16.3027	33.1801	20.142	19.7951	12.8168	0.5365	11.236	16.0908	12.5211	25.0956	34.4777
2.7278	13.133	8.167	26.68	25.1196	15.7143	17.9114	17.6421	3.972	26.853	20.6214	0.1332	19.2674	23.3312	36.0571	14.2173	16.083	20.1857	1.4386	11.0563	6.2534	29.482	8.537	26.0357	14.107	9.316	4.5369	27.053	25.7607	14.758	13.127	15.7032	26.8714	21.437	0.7955	28.222	6.4321	20.219	4.447	17.98	27.5339	23.797	17.7205	15.5842	2.9286	16.3911	19.5089	13.2866	19.2	35.3067
3.7186	9.359	0.139	17.9826	15.5296	13.6842	18.0838	20.6291	12.836	23.373	11.5526	0	18.4663	20.7429	29.2961	18.9818	10.551	21.6739	7.936	5.3653	4.5476	33.4	0	27.0855	7.253	14.625	5.6698	31.887	15.5211	18.037	8.026	15.7376	43.2632	20.975	4.3075	35.404	8.8026	15.981	1.964	16.3047	21.7007	28.265	21.948	17.2955	0.0573	19.5638	27.1969	10.9402	23.3224	27.6108
4.1826	16.814	2.662	21.9002	14.9077	8.1548	20.9935	10.9064	9.401	26.845	5.4702	0.1832	10.9769	16.9622	31.4048	18.5613	9.26	15.994	8.0065	7.1789	3.2177	30.757	2.462	18.5714	7.308	4.642	0	23.553	20.7786	11.895	7.053	22.2877	36.0536	12.337	6.1562	33.979	8.6131	12.532	7.637	12.8142	23.8482	19.222	25.4884	11.0759	2.5831	25.8173	33.4851	10.6962	19.9524	20.9269
3.2778	15.735	9.061	13.1345	18.517	1.8693	22.9205	7.3414	3.325	23.939	8.0341	-68.1382	11.7883	16.9035	31.1193	15.09	5.058	10.6664	17.5227	5.3967	1.7315	24.019	6.328	15.9432	12.679	9.525	5.2789	23.651	20.3045	3.305	11.281	27.173	27.3977	5.502	7.7869	27.426	7.4773	9.83	15.241	13.344	13.0114	8.811	13.1223	15.5635	-87.5517	21.9295	40.4732	9.747	15.358	19.0606
7.3937	13.46	3.927	4.0824	20.8674	6.0061	27.0785	1.9839	0.33	25.774	10.5732	-68.1382	10.0324	15.1126	27.6463	12.4454	2.951	6.993	17.2386	11.4767	0	28.098	1.628	14.3659	13.341	12.583	9.765	31.794	20.2433	1.544	5.806	29.4621	21.6524	11.794	5.2202	24.858	11.3933	12.729	18.527	24.7037	6.4162	8.281	24.3433	15.0247	-87.5517	21.943	48.2293	13.2725	16.4085	30.2973
9.8834	14.643	0	8.6578	26.122	17.6944	29.7058	0	3.275	20.43	16.9667	-68.1382	7.7864	12.6122	24.6222	8.1729	2.027	9.4301	24.9053	11.2706	3.263	33.769	8.682	14.5179	14.268	9.848	3.348	32.352	9.425	10.688	9.106	25.6389	21.7	10.759	5.0812	23.46	12.8583	10.616	11.361	18.1753	3.2069	2.517	26.5626	19.3882	-87.5517	25.0347	37.651	15.4541	7.3167	36.8146
5.8722	15.882	5.906	15.9856	25.2187	19.0389	21.3836	4.25	7.886	22.096	11.6722	-68.1382	0	15.6233	25.0333	7.7673	0	13.8301	11.233	12.0317	4.4519	34.864	9.819	15.7188	11.396	6.053	4.7369	33.04	16.6361	9.566	9.895	19.5556	27.7778	15.365	6.6756	18.971	9.7028	9.327	3.25	14.2013	4.8292	4.017	33.507	15.0715	-87.5517	30.5514	28.6121	13.1208	2.5778	25.8924
5.7938	21.805	10.487	17.2598	26.2965	11.4309	16.4529	7.8767	6.953	18.45	7.2287	-68.1382	9.0169	24.0615	25.5213	8.1577	4.38	15.69	14.9673	8.4015	6.9282	35.387	9.062	18.7766	14.335	6.373	9.1475	22.739	16.1984	9.565	6.168	14.7187	28.1011	23.342	5.3184	9.113	11.5771	8.615	11.39	12.2267	5.637	2.87	43.3071	11.3048	-87.5517	18.2104	31.9413	13.1875	3.7553	24.2318
8.8211	29.369	11.798	8.9204	28.8077	14.4327	18.8672	10.1365	14.73	17.303	4.0481	-68.1382	15.9627	16.6657	30.5865	10.25	3.433	30.5597	12.9886	8.5619	12.0886	32.463	6.557	-87	23.731	2.939	12.06	23.585	16.7298	10.943	9.016	8.5956	31.7452	24.303	10.9687	15.28	13.2115	6.013	9.844	8.7201	11.976	8.878	42.3146	5.8934	-87.5517	8.2875	33.3963	14.5508	2.375	25.5597
7.6178	29.251	19.762	0	24.6125	9.235	19.8914	4.5378	9.256	22.044	3.405	-68.1382	28.4881	15.5955	28.505	4.5473	2.328	25.2557	15.9836	7.2356	10.2213	33.03	9.393	-87	16.242	1.874	15.7069	21.321	15.305	8.159	6.464	7.0739	30.415	23.477	8.6812	19.863	12.72	0	9.166	3.8986	8.5525	7.951	39.9248	1.9221	-87.5517	10.8175	31.5682	12.4252	2.67	31.5874
4.7105	17.408	19.509	1.2377	27.8413	12.7212	21.2037	12.2999	3.951	29.976	6.0625	-68.1382	36.4771	12.4686	34.1731	0	6.149	21.3915	9.0751	3.6244	13.055	31.693	9.35	-87	16.683	2.708	13.7811	16.494	8.2202	8.395	8.992	17.0572	39.5337	21.265	9.3197	14.799	14.375	3.354	12.214	10.0326	4.7596	1.676	30.0165	4.3934	-87.5517	22.1673	26.5069	14.9883	14.5385	35.0261
5.3129	13.721	15.716	9.0704	27.1283	11.2018	23.9149	10.105	0.617	28.287	8.7939	-68.1382	27.4268	12.2516	34.6886	6.848	7.24	23.062	5.914	5.4574	13.1902	30.266	10.285	-87	22.878	1.37	12.6983	14.051	2.5934	2.798	12.329	16.5161	48.75	17.798	6.2154	13.539	14.125	8.446	7.521	8.9647	8.8651	1.951	30.1322	3.9183	-87.5517	20.9564	25.4907	9.1091	19.193	27.2249
5.8788	9.908	20.956	15.4973	27.2596	7.3413	24.2806	12.3384	4.254	33.082	15.1587	-68.1382	17.1935	15.4013	30.7885	8.6875	3.26	24.6799	10.9405	10.2062	13.7184	33.89	16.254	-87	23.337	3.328	13.8484	20.321	2.5038	9.626	11.309	13.6052	49.8029	18.601	5.887	14.755	9.6731	10.561	6.709	7.5759	15.6058	7.633	20.9156	8.7684	-87.5517	19.7106	24.4876	7.7046	9.9183	32.7857
7.1657	8.024	18.748	19.2791	29.8599	11.6078	23.1967	17.6675	10.75	32.308	17.056	-68.1382	9.5953	26.3214	33.2198	12.7225	3.17	26.3762	8.5619	11.4103	13.3101	34.422	11.3	-87	16.703	7.223	9.6283	21.787	0.6905	12.216	5.02	12.3199	42.0388	25.121	6.8674	13.568	9.1897	7.498	12.355	12.8664	18.8254	12.014	16.4262	14.8021	-87.5517	17.1323	18.7491	6.1299	9.2716	34.3933
10.4225	8.278	19.808	19.6098	40.8914	8.7807	18.0772	17.6401	9.595	37.656	13.886	-68.1382	8.7163	21.8394	30.7719	14.1331	7.082	27.1541	7.4097	16.9794	15.4182	41.314	2.895	-87	18.111	7.971	18.3518	16.371	12.4268	13.325	0	7.9722	41.2412	23.425	5.2242	22.895	7.2961	11.345	11.845	17.4253	11.0713	5.64	13.1322	23.642	-87.5517	19.0441	22.8504	2.9424	12.0526	23.1898
6.2466	8.463	12.426	19.6097	42.543	11.8281	15.5309	20.7903	4.973	25.622	6.9883	-68.1382	13.6953	17.9127	26.1406	12.3837	12.706	28.688	8.7074	24.955	16.744	37.861	3.584	-87	17.316	10.957	18.676	17.778	17.2211	13.255	1.219	10.4827	34.1094	27.876	9.1132	28.107	9.4922	9.502	11.931	12.5906	10.2539	6.264	13.22	18.3255	-87.5517	19.4437	30.6294	5.9754	12.082	13.5276
4.8383	9.584	7.757	12.7244	34.0988	17.0242	13.7816	21.2157	1.566	21.48	7.1169	-68.1382	17.7233	17.7713	25.6129	7.3092	7.014	29.8704	7.795	25.8738	11.614	39.186	8.218	-87	8.542	4.349	25.4313	13.575	13.6726	11.484	5.079	13.0421	27.8669	18.494	7.0514	25.826	14.5686	18.681	16.834	14.7989	11.1714	4.557	11.2292	15.8263	-87.5517	21.7593	30.4772	10.8918	10.3992	10.0126
8.3668	12.864	12.804	8.4427	29.7965	15.6186	13.8631	21.3803	0.196	22.121	0.9746	-68.1382	15.5901	14.0031	30.1271	4.4275	5.399	37.4849	3.9293	21.852	10.7649	37.953	6.751	-87	3.643	3.686	24.7979	12.789	10.4962	12.633	10.565	8.8296	25.4534	9.384	5.5524	29.485	12.0233	37.582	15.903	14.7628	9.4184	8.218	5.5323	15.6686	-87.5517	22.1922	26.0325	16.0906	10.5847	10.9839
7.4432	15.609	12.288	14.7351	-77.6875	10.0368	13.4011	26.544	1.641	20.109	4.3566	-68.1382	-91.5469	8.1779	30.2463	7.5416	7.356	32.9033	8.0327	24.1802	10.0581	43.19	-102.092	-87	4.082	4.651	25.7509	9.777	7.9199	13.798	8.53	6.5213	23.2169	4.506	5.4871	27.252	10.1838	31.337	13.51	18.6115	10.4007	12.679	6.5157	15.269	-87.5517	26.9566	20.8445	16.1534	15.2279	4.8343
1.9331	8.644	16.965	11.733	-77.6875	6.6629	19.6175	22.2543	9.859	11.289	7.3561	-68.1382	-91.5469	9.5758	31.0909	8.0938	7.626	28.9751	12.1477	20.5577	11.3508	48.752	-102.092	-87	8.923	8.229	25.3831	7.586	4.0735	18.089	4.836	3.8094	24.428	4.034	5.3645	23.833	14.9053	25.841	6.881	16.5086	13.2178	0	8.8439	13.321	-87.5517	26.2913	9.8027	16.0463	16.6742	0
0	2.041	9.918	11.2217	-77.6875	5.6042	24.7406	14.4743	12.621	4.159	7.559	-68.1382	-91.5469	6.5143	28.1528	14.1367	7.037	30.9385	13.8011	20.1616	8.6359	48.355	-102.092	-87	5.745	4.201	17.3522	12.012	9.3361	19.672	6.031	2.2396	38.2222	0	4.6076	21.203	17.7083	12.393	7.599	16.5468	15.5625	1.808	9.7369	19.434	-87.5517	30.166	6.4003	18.3951	17.9375	6.0271
0.8829	0	3.741	7.93	-77.6875	0	22.6201	11.3872	13.669	0.086	12.1304	-68.1382	-91.5469	13.7375	32.1739	21.176	6.176	26.8618	7.235	19.7894	13.8637	48.822	-102.092	-87	6.475	0.867	21.5608	8.714	6.9678	17.566	7.851	7.8635	40.5362	2.616	5.6109	24.331	21.4112	5.618	8.509	11.9144	16.9248	2.271	13.8623	27.1916	-87.5517	32.6661	4.5203	17.8659	19.5109	11.0141
3.6859	6.374	0.328	10.3344	-77.6875	8.0294	19.5482	7.6653	12.075	1.745	9.6654	-68.1382	-91.5469	11.619	32.5	24.0195	12.051	18.6092	10.7937	20.8677	12.8338	49.065	-102.092	-87	9.597	0	25.4898	9.681	7.6074	11.426	4.077	9.3338	37.5037	5.863	3.2444	25.829	19.8971	8.385	6.073	8.2873	20.0846	3.344	16.3576	31.7947	-87.5517	32.5338	8.9548	13.9218	21.364	18.0512
10.7508	6.451	0.155	10.6699	-77.6875	9.4257	21.4033	7.846	13.485	0	7.6013	-68.1382	-91.5469	12.2009	32.9122	18.4558	15.386	17.6675	13.617	19.4301	18.0821	41.785	-102.092	-87	13.91	3.055	26.9207	21.605	3.3872	10.585	5.005	7.6659	33.8176	8.013	5.2305	26.615	12.4561	1.739	3.151	-101.491	21.5693	2.602	12.8402	30.9271	-87.5517	29.1051	14.4563	12.5348	22.098	22.4451
7.6956	4.364	8.105	15.8478	-77.6875	8.7089	22.1929	9.6559	14.932	4.452	7.2397	-68.1382	-91.5469	11.4565	32.976	16.1426	11.714	18.5357	12.9989	17.3953	22.6258	38.114	-102.092	-87	16.621	4.09	26.0239	12.538	6.4476	13.109	7.66	3.0944	30.1404	6.066	7.0963	24.083	16.3853	7.006	5.346	-101.491	23.4769	3.708	10.6745	24.725	-87.5517	23.5495	13.1718	10.5892	21.2842	22.3554
6.6816	7.38	1.647	15.5838	-77.6875	14.3269	13.1172	14.3592	13.317	8.421	10.859	-68.1382	-91.5469	10.8981	28.0481	15.2724	14.728	17.9267	13.979	14.8007	21.6527	32.397	-102.092	-87	11.242	1.458	25.8356	16.174	7.4686	7.685	5.883	6.0427	27.5705	9.308	3.5568	22.27	11.5288	14.352	6.215	-101.491	21.4119	4.481	8.9412	20.9816	-87.5517	29.5888	14.5565	12.6357	17.984	20.5373
5.5804	7.115	3.123	12.9728	-77.6875	16.7204	17.189	17.8265	13.05	9.333	14.9375	-68.1382	-91.5469	16.5587	28.4046	11.962	10.699	10.391	13.5018	15.7831	21.245	31.676	-102.092	-87	20.056	0.372	30.9428	15.163	4.0342	3.422	2.819	5.3001	27.5362	2.768	2.4358	28.005	7.1776	12.218	3.26	-101.491	15.6941	6.485	11.9052	21.2791	-87.5517	33.8303	5.9633	16.0323	17.9836	23.5088
10.379	13.671	3.629	13.2812	-77.6875	20.4643	21.7554	16.8409	10.345	4.56	13.1935	-68.1382	-91.5469	15.6348	26.2619	16.5167	11.879	8.4583	14.5987	28.2355	20.4886	30.614	-102.092	-87	20.549	3.709	25.9911	16.455	1.9661	4.937	3.491	9.2193	34.5179	18.397	1.0848	21.961	6.2113	7.577	0.625	-101.491	14.9613	1.683	15.4437	21.7396	-87.5517	33.1952	0	12.3866	14.0833	16.9835
Q21
38.012	9.2917	4.975	155.333	90.2885	41.4901	34.2917	146.17	17.6979	114.058	147.05	32.4375	151.194	77.2614	21.375	126.593	83.7333	36.5043	56.0326	65.909	131.121	46.1893	7.4741	82.006	26.0373	63.5214	187.414	0	16.0893	0	26.5341	83.5125	42.4353	47.4135	30.4333	145.463	0	127.71	112.882	115.571	61.2237	66.0536	79.382	27.7321	149.133	116.286	101.059	37.681	176.994	36.7083
64.887	11.2292	20.0375	90.395	29.101	16.4276	53.8542	69.67	18.9479	94.183	81.4875	41	117.319	44.7614	9.375	105.093	6.6083	52.6918	92.0326	122.409	61.934	25.4393	10.4741	88.756	25.0998	38.4589	168.789	13.625	8.6518	16.1875	53.8466	71.1375	46.9353	54.476	38.6208	153.213	11.9375	125.898	110.382	97.633	70.9112	85.2411	112.132	45.6071	161.258	131.224	51.871	49.118	139.619	32.0208
149.762	9.7417	0	64.433	27.9885	5.0651	74.6417	25.345	20.1729	81.308	58.5	42.6875	98.744	44.4614	1.75	74.668	4.3583	60.6293	81.7826	98.034	30.946	35.5893	17.4241	108.406	24.9623	40.7214	125.914	28.3	11.6143	29.625	52.4341	92.8375	34.9103	51.8885	49.6833	83.488	28.2	91.61	126.782	81.171	65.7737	60.4536	123.632	41.3821	81.533	161.136	30.909	74.956	131.244	34.4833
131.637	0	19.6417	40.625	57.6218	23.4484	67.4584	17.337	38.1979	51.85	41.9667	31.7708	88.527	40.3031	43.625	68.218	11.025	51.421	55.3243	73.076	12.371	33.106	54.6824	79.131	30.7456	49.9381	87.872	31.0417	1.7143	26.0417	64.9091	94.3875	42.602	58.8718	92.8916	46.671	48.2917	64.293	104.465	76.779	58.6404	63.9703	101.257	31.1904	75.383	167.036	43.434	102.264	105.327	36.125
45.437	0.9667	13.45	14.583	52.2135	37.3401	43.6917	17.87	25.2729	26.283	25.95	21.5625	45.819	17.9364	29.725	63.168	12.8583	25.9293	71.1576	74.334	13.721	32.0643	36.8741	48.056	20.2123	51.5714	65.739	24.075	13.7143	11.5	54.3341	44.9375	44.7603	50.4635	80.0083	39.788	49.1	47.135	101.532	89.421	74.6737	38.8786	74.207	25.0321	84.683	127.911	49.184	70.381	60.494	24.8083
15.512	8.8473	24.8222	0	25.4829	37.9207	63.4306	20.323	23.5173	24.78	19.3556	12.0764	30.472	6.2892	34.3611	59.246	33.6639	38.6015	43.977	62.562	21.44	19.3004	18.363	47.062	20.7456	30.327	28.108	25.6667	2.8254	10.1806	48.1174	14.0542	40.5047	44.7885	59.4333	30.671	13.7778	30.266	77.438	64.571	75.9459	14.248	51.799	28.6488	79.939	61.814	45.392	53.667	53.216	6.1666
11.595	12.0417	23.5167	0.583	29.2677	14.1984	51.6875	12.441	19.7187	34.954	14.5917	13.8333	36.298	14.6364	29.7292	34.822	11.2958	46.9418	42.6576	71.138	17.288	15.0226	11.3283	26.298	27.954	18.3547	11.06	31.2708	0.3393	13.25	30.2841	9.4917	19.6853	29.2468	49.6416	15.484	22.9167	28.022	60.653	35.467	42.1404	5.9286	38.361	17.1071	60.695	35.307	28.788	41.327	21.452	0
11.566	15.4346	30.6179	13.994	21.4492	27.3472	33.2203	9.081	14.7158	32.362	11.6214	9.0268	31.98	32.0114	27.5179	14.968	11.9119	43.9507	39.0326	91.463	6.728	17.7072	5.7062	16.667	20.5373	14.1821	5.325	39.375	0	21.6429	23.6948	18.8518	23.7567	12.8599	35.1476	8.249	26.5179	28.871	37.65	16.75	40.813	9.625	15.936	2.5357	50.847	9.59	12.559	20.931	6.851	4.2262
20.78	8.7381	34.1179	14.708	21.3242	34.5258	29.8631	18.545	6.8408	27.558	3.0679	8.0446	25.158	47.2435	20.1786	23.236	32.0904	12.7007	18.1576	75.23	9.871	10.8143	10.867	26.31	27.198	15.8428	5.485	46.3393	14.0357	15.4464	14.4091	14.7089	17.9353	15.3778	26.7547	14.052	21.9286	7.389	8.168	0	34.5987	0	0.132	0	25.258	0	9.88	18.342	9.083	3.6012
19.938	15.6446	35.8941	8.598	25.862	26.3504	18.527	13.31	8.4847	21.529	2.9471	8.3493	23.444	32.5702	24.7941	29.762	26.0789	9.0117	10.8855	31.063	8.349	8.4246	26.6947	27.874	23.427	24.8596	15.723	48.8824	19.0672	11.8897	11.2106	9.2699	15.2515	14.862	16.5657	10.912	22.1618	16.004	0	8.071	33.8855	7.3624	0	1.7321	13.898	3.124	9.838	10.482	10.2	3.5245
30.403	12.9792	38.725	6.583	13.101	19.7089	13.0729	12.107	10.3073	10.917	12.9094	7.25	22.069	39.6676	13.125	31.593	22.6708	11.1918	6.3295	32.753	7.637	9.6112	29.271	11.522	21.4748	26.5058	23.305	45.4531	25.7455	24.7969	5.2997	12.4031	19.9197	13.8354	22.7771	0.682	8.3594	21.132	11.038	19.555	18.7862	20.8192	2.773	6.2321	17.821	10.395	16.231	9.306	1.072	9.6302
41.462	19.1042	41.55	11.733	12.6635	17.1901	28.8542	11.857	14.3479	14.82	17.5875	1.875	41.594	24.2239	12.7625	29.605	21.1708	27.2918	1.1201	41.746	9.984	6.3268	23.8366	6.818	30.6123	21.4339	20.252	33.4375	30.9268	33.45	5.0591	0	21.0978	6.8635	20.1833	0	15.95	17.685	9.12	13.059	13.5112	26.0036	0.294	9.1571	19.458	15.836	15.284	15.943	10.031	11.8458
24.469	16.7808	47.7522	5.79	23.4624	9.4521	19.3895	7.643	8.9316	26.58	20.4739	9.0788	22.216	8.9679	3.9239	28.903	15.2387	35.2597	0	22.827	14.203	14.6023	23.6263	9.832	23.3688	15.1844	17.599	37.8587	28.486	18.1141	3.8384	8.2897	15.7233	12.082	12.9985	6.273	26.5543	29.764	8.828	14.538	10.8107	33.434	2.447	3.2321	23.426	29.09	15.363	17.643	12.135	12.1811
4.148	20.3258	37.4523	3.435	18.1294	13.1265	10.1326	0	4.5161	37.774	24.5273	1.983	16.33	0	3.3182	42.502	11.8697	36.7998	11.044	0	9.371	14.7688	17.8264	8.938	10.0941	19.5669	7.096	39.3977	32.2938	6.0682	0	16.1261	7.3444	9.834	17.4106	17.747	29.0114	21.415	20.473	12.605	21.3373	21.44	3.155	2.9253	23.997	34.445	8.775	9.295	10.289	14.1856
2.012	13.1979	27.8604	3.573	19.7156	12.2713	0	5.701	0	30.746	22.9771	5.0521	23.288	9.3343	14.6979	24.749	9.1187	33.7543	8.6055	5.034	9.434	17.4393	19.4116	3.61	7.2873	16.4797	5.643	39.7917	46.3914	5.1979	2.7737	16.8875	8.1645	9.0489	15.7145	21.984	22.7083	15.762	14.861	4.467	12.7237	16.6578	1.361	11.2633	21.216	23.901	11.913	0.244	7.796	7.8645
12.002	12.7188	30.5896	6.26	13.7468	10.2713	9.3438	8.983	4.1354	22.902	15.0396	14.5729	24.152	18.8135	16.2917	18.353	9.1708	26.6189	12.1055	4.899	3.173	13.4081	20.5783	4.1	16.5061	7.9276	5.445	38.3958	39.1414	22.6146	5.7737	20.2208	8.4561	5.6323	6.8083	15.484	19.5312	7.845	13.32	18.165	9.4216	11.5119		21.6279	16.8	15.192	15.694	5.337	11.692	8
8.409	18.0417	41.5052	13.135	7.2454	10.1754	26.2227	15.562	8.4091	7.437	10.5241	14.3513	30.815	19.7614	17.7241	25.149	3.9445	19.5172	15.4723	7.56	5.815	4.6031	23.0862	6.584	11.3778	5.4352	0	49.3966	29.8436	36.5302	3.1117	20.2496	0	4.9954	2.0023	13.062	14.319	10.969	19.296	27.899	14.103	4.7605		19.2235	18.874	12.183	18.283	11.573	9.339	8.5574
0	19.2084	37.225	14.941	1.8718	9.9818	13.05	20.387	14.7062	0	5.0083	10.4042	25.494	11.7031	12.375	23.285	0	15.571	18.2243	13.601	11.246	0	27.5824	10.781	7.8706	5.8631	10.489	38.8667	26.5976	36.3167	4.3341	16.3292	1.0936	8.2552	0	11.388	11.1333	13.435	24.199	27.938	19.0237	7.6119		15.6988	17.916	18.369	11.467	10.573	7.144	7.7083
12.718	25.9084	36.15	17.575	0.3635	8.5901	11.1667	24.57	19.4479	9.841	0	7.0458	25.727	8.7031	14.3667	28.593	7.4916	15.496	23.2326	20.617	15.121	6.0704	26.0574	25.814	7.629	2.1047	16.914	30.2083	27.9976	21.1833	9.0591	11.1042	14.8686	16.9385	0.2583	14.063	7.7667	12.177	26.732	31.596	16.2654	1.7453		16.0071	14.466	14.136	10.151	11.231	19.336	12.6666
7.932	35.324	26.7452	19.164	4.7562	8.849	14.1869	29.561	17.0245	11.542	1.0016	6.4456	16.92	8.213	12.379	26.178	1.1083	18.3067	21.3229	28.55	6.109	6.7597	24.3451	36.522	8.2752	1.6988	5.543	29.9919	25.4401	28.0524	14.0422	7.3875	16.6571	18.5546	0.6672	16.846	9.879	0	22.39	29.127	15.7237	2.3036		12.3692	23.617	22.665	2.244	3.072	23.268	19.9462
	30.8889	27.6069	16.014	11.6774	6.3859	12.0278	30.871	18.0798	10.884	7.7514	0.9931	14.354	9.8586	4.1042	15.982	8.7958	19.8654	18.0465	27.069	5.475		36.3699	28.145	9.7526	1.7158	3.004	36.3472	17.5615	23.9444	14.9438	14.1931	10.2617	16.4968	1.1694	16.998	15.5486	5.224	20.292	23.203	16.8695	2.873		9.8779	16.716	17.55	2.698	0	15.737	23.0416
	21.9314	25.1441	13.796	7.0826	12.4386	16.1446	26.744	13.1464	6.992	19.4985	6.8419	12.613	11.0776	4.7059	13.519	8.9098	26.1661	8.3561	20.13	6.099		34.805	20.3	17.8241	0.7861	8.421	37.1912	16.6628	20.375	13.4753	22.0934	10.3912	9.9135	1.1907	20.184	15.4191	8.188	23.823	7.983	15.584	4.0536		8.9674	15.699	11.426	6.36	0.578	11.045	24.7671
	18.1917	30.8714	17.919	5.1528	13.7865	15.0131	23.774	3.8443	8.344	18.6214	9.5018	15.837	6.84	5.3214	17.225	9.0869	17.2793	5.354	17.305	12.753		23.917	9.906	17.8194	0	18.75	41.2286	21.8857	15.2893	12.7127	21.6304	17.046	10.1456	3.0476	22.674	15.2143	10.053	29.653	10.4	14.538	14.0679		13.275	12.419	13.229	9.73	0.835	5.744	21.8333
	19.6009	26.1526	14.78	9.5977	15.5098	22.0812	17.038	2.4084	11.236	16.3066	9.5625	18.003	9.2219	12.1711	19.915	8.6807	11.1425	3.8879	14.823	12.16		24.3952	3.664	17.1886	1.3306	21.572	44.9408	21.2406	12.8618	6.4617	14.0454	19.6195	5.8543	5.4859	15.845	17.6974	13.151	33.757	7.466	16.9869	13.3957		19.7321	6.811	17.24	9.908	4.069	7.297	32.182
	15.4227	19.3738	12.303	15.2111	10.5318	20.131	11.825	1.0015	11.606	16.0857	9.372	23.009	16.5947	1.6964	20.742	15.025	21.5936	6.735	16.594	14.669		22.7181	2.833	11.3766	5.3071	12.259	41.5833	27.5238	19.7381	10.3139	7.0839	26.0067	7.2885	3.3559	20.671	15.1012	15.49	32.525	15.375	13.8963	11		10.4226	2.901	19.012	5.779	3.985	10.274	33.5476
	19.6837	18.7818	11.305	17.0783	9.3708	22.5019	13.079	3.7434	7.399	19.8341	7.4318	23.336	21.2103	4.9318	20.684	12.739	15.8054	14.9076	15.903	14.201		30.2127	0	10.3384	15.9191	19.886	41.2614	26.2768	16.3977	8.2159	8.0523	26.0148	4.3567	4.7799	29.48	14.2102	13.318	29.359	15.219	10.2294	14.4059		5.7491	7.957	9.956	3.86	2.812	9.46	31.9697
	26.0783	16.2585	13.674	10.7153	7.7249	25.9563	16.941	7.768	9.698	19.0012	9.6692	23.029	18.3712	10.5854	21.505	12.9802	12.7939	17.2582	17.254	15.148		33.4802	0.835	11.2538	17.5214	17.627	44.5	19.7753	11.4421	9.9731	12.4058	19.6091	2.3861	4.415	26.429	16.2134	12.259	29.998	9.912	13.3274	6.6329		11.9638	1.603	11.28	7.577	3.349	6.543	23.9796
	23.2806	21.5333	15.127	9.1441	11.3984	35.8139	15.173	10.4229	14.385	22.5333	5.8819	10.988	16.1424	12.6667	13.724	11.5083	4.996	18.2159	17.44	13.302		17.7463	7.25	12.2956	10.1714	11.064	44.1056	13.8254	14.925	16.9151	14.8153	15.4436	9.9941	7.1166	25.844	23.6	9.977	37.46	11.421	14.3848	6.1425		16.9432	1.077	14.458	6.559	4.012	0	28.0555
	32.475	26.3611	15.855	7.4996	16.0929	28.2806	12.284	9.8951	19.74	23.8889	7.2931	7.6	24.5687	10.35	4.807	7.2861	8.0626	17.077	12.517	8.924		12.213	9.434	10.0901	10.3825	7.531	39.8889	15.3087	19.9083	20.4195	6.1931	13.2159	7.6663	7.85	25.032	18.1333	9.932	38.932	23.838	5.557	1.9647		16.0543	0	19.742	7.757	9.828	7.527	30.7666
	32.5151	33.4138	15.322	6.2672	8.4342	24.547	10.284	7.4612	23.888	19.9223	7.512	5.024	33.9582	4.2287	0	9.853	3.9431	12.6815	23.316	8.937		12.5007	14.979	5.4229	6.9257	8.978	39.617	17.5015	18.6463	10.316	0.9939	11.5656	3.7832	10.5024	33.476	23.7606	3.465	35.435	23.443	7.7131	6.3462		7.1044	5.633	19.095	0	4.216	9.872	27.195
	21.1715	35.5471	11.843	6.5193	4.4276	20.0513	5.583	14.1642		14.5837	10.9712	8.675	21.8239	10.524	9.319	16.3343	12.8553	13.8163	33.5	6.371		10.0847	20.496	2.1142	5.5118	13.914	38.2452	23.3585	15.6298	11.3274	4.1375	5.4738	6.2741	10.8756	35.684	23.0865	6.758	30.545	24.278	6.8535	13.8565		7.434	8.729	21.204	4.203	1.902	12.994	28.4391
	17.3067	29.15	13.678	5.3685	6.2301	23.4717	7.195	18.1329		8.635	6.6825	9.154	22.0814	8.17	10.118	9.0733	14.8593	16.2526	29.469	6.951		5.4841	11.491	9.3673	5.7164	20.414	34.745	15.7843	7.2	7.8541	9.1425	4.4653	4.4185	6.9633	36.113	20.845	9.91	34.062	27.306	8.0787	15.4636		11.1371	10.638	27.091	9.069	4.556	13.364	19.3233
	14.21	28.5471	15.766	0	7.4276	26.0898	6.978	21.9046		9.6654	0	17.958	23.1989	12.351	11.17	7.1612	10.6341	18.7201	21.774	2.972		5.402	17.064	7.0229	4.6656	30.597	41.5721	15.296	8.3221	8.4235	8.1808	0.8295	1.1875	2.4814	31.973	23.9038	3.854	28.267	27.239	5.9304	15.5151		14.1552	14.768	31.863	13.054	7.397	9.532	22.5881
	16.9803	25.293	15.193	6.4245	11.6063	20.6645	9.887	16.3229		14.8395	1.7928	9.918	25.2658	9.9254	6.731	5.4548	10.3398	13.4493	18.047	3.557		1.0925	8.782	0	11.2232	23.072	44.5789	29.2538	8.3136	7.9245	10.1682	3.8322	2.692	4.6526	31.926	30.636	3.631	25.636	24.681	9.8421	10.8913		18.3242	19.444	33.198	16.199	7.859	10.196	21.8026
	13.6523	26.4942	15.958	10.1972	6.1776	25.6282	14.247	12.9287		19.4202	4.8317	9.184		8.4038	0.194	4.9448	2.1341	11.6239	23.866	7.491		4.6664	6.299	5.244	8.9493	14.602	43.4279	32.0701	8.9423	10.5774	8.3587	8.7766	0	6.8371	31.227	24.7067	7.96	25.339	17.153	13.1852	4.3084		16.2033	15.647	27.517	5.843	11.224	6.138	18.8381
	9.4986	35.0526	22.497	15.2152	10.8996	29.3607	15.898	8.7453		19.5198	6.9289	7.599		0	0.145	2.0954	0	11.149	28.025	7.453		0	14.622	5.8778	17.8792	11.638	39.2759	32.835	11.5043		10.5599	6.5732	1.9609	6.0152	28.769	20.8276	14.072	27.99	5.528	12.6504	9.8596		15.4174	12.818	21.2		12.81	7.166	18.135
	11.9935	40.657	18.715	10.3718	7.3958	32.125	15.949	10.2045		19.2342	15.3147	4.391		0.4956	5.24	2.7487	0.9407	12.594	27.481	0		3.0399	15.006	4.9781	21.2451	13.177	36.7368	28.9862	16.1162		14.7647	8.091	2.6218	6.714	33.847	15.6447	16.671	20.557	3.76	16.0965	13.3562		16.8023	7.203	27.641		17.091	5.976	14.4342
	12.4128	39.432	12.892	6.0229	11.8846	29.3229	21.065	15.0299		18.1164	16.4219	5.366		4.5977	10.175	0.7528	5.7387	14.2084	27.069	0.969		3.5405	14.471	7.5842	16.33	18.391	36.1523	34.9096	19.9961		18.5242	11.8025	3.1362	7.6013	33.022	20.9961	14.522	17.78	15.126	14.044	17.7567		24.2633	6.492	34.708		10.779	6.283	15.2786
	8.6223	36.475	9.184	6.0506	15.0587	28.2191	20.851	17.6939		19.8081	18.1351	2.061		9.9234	14.734	1.7857	8.4599	20.1374	33.199	2.992		5.7765	5.147	10.376	13.0174	22.059	34.4355	31.4966	18.0564		10.7786	10.2821	1.853	8.5986	36.173	20.9637	11.291	22.007	24.002	10.1108	16.9165		17.9902	6.048	31.294		14.996	6.139	13.4099
	15.7917	35.2144	10.439	9.6487	8.9498	23.9654	23.477	13.3568		18.0034	15.2341	5.253		10.1441	11.485	0.0871	2.9005	15.2275	28.835	3.577		0.83	5.142	12.5394	9.9706	19.795	36.089	33.0787	16.786		5.4129	13.9289	7.6063	3.5901	36.808	28.589	11.498	18.602	26.647	6.0076	12.5917		6.0838	6.616	28.388		15.645	6.587	20.9053
	19.0638	34.1037	15.579	13.2811	4.4864	25.4277	28.641	11.0803		18.4066	15.125	10.734		12.0184	13.479	4.6561	1.3572	20.5436	24.376	8.919		7.9042	8.068	8.6549	13.0839	14.065	43.4338	30.3062	22.3051		7.3324	18.7956	7.3804	7.9186	30.544	19.7757	12.997	16.709	20.872	5.1134	12.7154		6.7395	6.291	30.11		17.096	9.295	32.2267
	16.8106	37.7818	19.208	16.9362	6.4068	24.4962	23.462	15.3153		24.6826	18.2443	12.743		10.7841	15.104	7.2863	2.5081	17.3205	21.977	15.129		9.3643	5.021	9.0525	9.4002	12.077	45.7689	30.6045	21.0227		8.2246	14.3141	7.9362	12.0431	26.164	21.178	13.009	26.003	17.654	11.5495	18.1407		9.5882	3.773	26.214		20.825	8.975	32.0757
	16.8438	43.1903	23.718	10.3267	7.622	20.8924	27.792	15.1667		23.9944	16.7222	11.18		17.3194	12.683	11.0805	3.6224	15.4007	18.805	12.708		10.8074	13.221	5.3741	11.452	11.115	50.7326	26.315	22.4479		10.7868	13.2721	11.667	11.5861	23.678	26.2257	16.838	34.285	26.064	12.807	15.4425		15.8502	5.723	26.46		21.698	12.411	28.4479
	17.6323	40.6217	30.974	6.3682	6.8542	27.9511	25.668	12.9026		19.1877	17.3542	13.882		18.1667	12.848	8.1228	5.709	20.0761	18.617	14.054		7.1118	10.18	3.6877	16.0105	14.265	46.9312	25.1744	17.7772		13.7462	13.2922	7.9298	12.2376	31.787	20.4565	18.898	39.57	31.752	11.644	12.2348		9.3009	7.651	34.953		18.034	13.302	28.4166
	22.2733	37.8831	30.245	10.6451	3.935	29.7807	27.115	11.0104		18.6309	12.7096	10.54		14.7904	10.946	4.3032	7.4271	23.8267	15.416	10.886		3.3381	13.359	4.4785	15.3082	19.403	45.8456	29.468	16.7684		10.3507	17.9794	8.862	11.2789	31.07	22.4559	13.526	41.114	21.633	12.9663	10.0867		7.4086	5.979	31.11		19.409	15.472	28.4877
	22.6599	31.8905	29.745	11.5926	5.5813	26.4505	23.643	18.1168		16.1041	11.1706	11.147		14.9865	2.62	7.7299	11.2948	25.1103	20.318	9.993		2.9673	11.901	6.6961	12.4977	19.184	41.4122	25.9711	20.6588		11.4584	17.29	11.8696	11.4434	29.804	18.8311	11.892	37.537	14.402	12.6156	9.361		8.3841	2.616	23.806		19.705	15.535	28.5157
	24.6033	31.1342	24.973	10.4837	7.3925	29.2848	20.836	19.6414		15.0808	14.9923	10.879		15.6027	1.879	3.2521	9.8314	24.4196	28.301	9.441		12.6556	13.427	5.8507	7.8296	18.633	37.6199	21.4985	20.7551		20.1752	13.4233	13.2714	14.2997	29.547	15.7089	9.419	34.639	13.434	6.2477	7.1735		9.3725	3.832	24.152		17.734	16.128	23.4463
	20.7532	38.1481	22.093	8.375	0.9741	30.609	21.026	17.2908		19.7744	14.5721	6.518		23.234	7.519	6.6628	10.2543	21.0486	28.717	7.268		15.9581	8.794	2.7424	9.9509	20.321	31.0321	19.9611	15.5288		18.551	7.4609	9.9423	14.5519	26.649	20.8141	9.313	27.674	19.177	2.5025	10.076		8.6968	8.082	21.857		18.2	20.061	20.5609
	17.7654	37.0408	17.106	12.1536	0	32.9331	24.032	19.438		17.7046	12.9671	0		24.6316	9.961	5.2728	4.2247	23.2727	31.662	8.901		15.0761	5.726	2.5274	9.676	24.078	30.1184	20.6715	14.1974		14.8842	6.9485	9.0155	16.0057	28.766	24.2072	8.315	32.07	24.219	0	16.0536		8.1203	9.919	22.668		19.306	16.912	20.0471
	13.9256	40.1268	18.782	12.1962	0.0734	31.9852	29.947	21.7366		16.3952	14.4494	1.512		25.2917	4.65	4.6648	2.4983	23.8034	26.352	8.05		12.3997	10.408	10.0046	7.3875	21.792	28.2738	21.6637	16.3155		11.8488	6.5365	11.2796	20.6803	40.174	28.0625	7.067	34.028	24.092	0.185	16.0982		10.8631	4.19	24.634		21.776	20.988	17.2023
[truncated: 255 more columns]

## Sheet: Fig 3 supp-source data 3E
D21
262.205	242.902	213.933	458.969	308.068	241.358	201.103	275.021	344.664	134.789	252.179	171.921	160.36	419.095	495.909	1526.75	396.335	268.161	29.372	239.659	435.583	387.226	283.638	924.758	139.798	330.364	606.225	673.01	82.6	306	371.892	452.308	111.037	282.167	131.082	28.1972	168.345	527.821	211.125	526.746	172.342	387.056	465.437	567.447	533.042	733.839	522.947	846.241	618.519	306.334
339.893	209.714	275.558	370.219	235.63	174.17	175.291	255.959	304.539	135.726	311.054	285.983	148.797	168.845	513.846	1154.63	377.272	143.161	109.31	278.659	238.083	345.289	331.326	790.383	243.236	310.114	947.35	632.26	104.412	218.812	310.454	643.87	203.35	167.229	143.207	69.2597	202.907	449.696	223.313	308.746	124.092	739.306	303.437	343.447	323.979	818.339	408.885	674.804	497.582	302.771
293.205	203.502	274.608	380.019	266.868	140.708	158.103	295.771	230.089	157.064	326.229	430.371	140.785	79.745	455.684	880.653	398.76	147.311	114.422	243.309	151.108	274.501	223.588	524.083	216.148	433.139	968.325	484.235	118.65	155.9	252.392	854.808	224.012	112.367	132.457	57.6222	200.145	328.221	201.675	269.646	63.942	812.081	230.662	268.322	285.567	679.689	346.797	557.616	360.944	225.959
266.872	212.235	196.516	512.927	199.026	140.941	110.895	293.313	206.747	164.081	289.262	360.796	139.943	49.095	298.451	542.961	376.335	166.661	90.705	182.117	126.208	183.934	125.596	313.425	156.631	623.822	806.558	360.76	127.392	159.333	232.809	735.891	194.662	62.334	137.749	61.7389	151.845	208.071	169.542	336.788	66.842	730.181	190.312	199.114	251.209	504.881	307.989	423.824	263.519	154.751
190.68	181.702	165.483	352.694	96.293	73.683	46.403	284.071	219.389	183.514	164.004	205.821	123.835	22.62	159.859	244.353	216.635	75.986	73.947	103.834	95.158	128.201	104.838	195.883	83.023	775.414	498.7	223.96	120.425	176.175	237.192	325.658	176.837	32.742	123.282	66.2222	135.92	146.546	127.25	341.371	89.992	543.581	127.287	120.697	205.192	295.364	250.972	268.566	192.769	156.809
130.177	154.874	131.502	262.802	93.901	73.914	9.881	171.299	200.289	159.108	103.818	70.338	92.679	21.706	94.645	175.42	140.349	34.661	57.233	55.02	50.819	95.657	87.999	142.161	88.992	704.961	211.197	154.524	96.878	188.694	255.114	119.03	156.44	33.556	61.54	80.5444	132.734	91.488	78.458	315.107	63.37	263.987	86.673	40.628	149.917	204.478	150.975	197.338	121.644	145.459
101.497	187.173	114.766	83.031	82.672	36.566	27.895	91.125	171.081	104.289	100.825	45.442	99.881	11.97	63.784	110.565	154.793	27.828	83.226	50.742	22.854	102.122	70.95	103.737	77.298	520.364	173.725	58.593	68.162	165.125	228.913	51.454	110.016	0	45.186	86.218	135.366	100.779	65.646	287.85	31.238	154.452	51.041	18.072	143.771	171.401	115.03	167.137	84.477	106.23
55.312	195.741	109.112	87.183	56.479	33.697	34.21	70.235	101.825	82.218	89.268	34.742	102.628	58.113	51.016	100.021	114.139	15.322	61.765	50.659	10.244	89.994	65.156	107.794	48.459	249.793	153.457	44.01	39.314	102.589	215.517	38.826	40.126	14.828	58.707	72.5008	128.738	100.696	75.018	224.996	22.521	84.52	35.598	30.233	70.846	135.91	106.59	124.616	74.43	58.763
38.294	121.241	89.326	64.273	52.05	47.983	14.139	67.771	92.896	69.61	70.125	39.85	67.806	68.149	38.23	80.182	79.621	0	55.872	36.605	10.672	79.851	70.352	127.597	28.459	133.096	96.35	33.028	21.225	71.125	212.856	34.629	19.216	13.221	60.707	62.9472	96.756	107.66	67.161	211.246	20.378	73.36	26.312	24.661	52.881	126.053	90.358	83.562	88.465	65.263
32.176	80.887	78.558	19.322	45.318	53.667	17.971	67.197	75.054	87.693	56.282	16.642	45.235	43.801	13.24	78.003	79.195	4.411	57.651	21.63	27.84	81.675	69.476	125.765	37.166	90.886	89.593	14.459	26.806	29.662	151.892	36.661	0	12.608	36.075	61.4546	59.889	103.453	65.066	139.393	7.96	56.255	1.841	40.204	51.343	99.927	100.535	67.734	69.791	71.959
39.127	84.449	74.417	0	37.443	61.889	34.556	44.833	58.445	70.148	53.085	5.843	37.219	47.486	8.159	65.612	64.929	10.942	51.56	20.737	60.739	81.163	52.357	112.117	43.157	65.286	80.397	14.76	21.147	12.484	80.501	57.386	0.115	19.214	25.379	81.5878	40.579	105.259	28.578	94.637	14.404	46.962	0	79.072	22.839	91.027	65.759	73.507	41.722	43.709
69.568	95.139	60.445	7.319	19.893	50.82	40.94	13.421	68.089	83.514	44.391	22.609	35.173	50.445	19.534	31.265	74.922	8.286	23.009	31.484	44.083	111.126	48.275	106.921	44.336	42.652	71.525	8.748	17.675	27.625	50.154	53.783	5.587	13.967	58.07	94.2722	44.008	101.859	27.775	76.471	36.604	51.319	13.337	92.297	0.054	70.964	11.872	45.404	47.456	29.421
90.564	87.891	34.982	37.589	13.579	57.782	35.625	13.651	82.115	87.925	51.94	26.682	27.887	40.628	30.393	43.427	77.33	20.096	54.948	47.507	34.523	99.894	43.388	117.535	72.744	31.761	75.16	0.461	44.611	42.793	44.968	46.123	20.271	13.613	38.218	75.3222	65.91	108.245	34.766	68.963	28.831	65.627	8.529	49.615	0.895	52.665	17.643	26.214	31.97	38.829
66.375	96.595	38.842	39.105	10.466	31.494	27.126	20.226	77.937	79.789	53.156	33.807	8.508	25.64	22.341	45.003	89.608	40.138	64.645	41.295	23.401	72.033	46.218	101.326	80.787	36.853	47.907	17.987	46.861	36.466	16.915	22.263	19.992	15.076	66.196	52.2313	69.345	85.094	32.261	100.314	19.422	67.181	10.823	22.617	0.997	64.566	10.879	34.377	40.712	44.277
61.143	85.975	43.537	30.459	18.88	18.983	26.863	17.073	104.716	46.445	44.231	35.879	16.485	26.522	31.617	43.451	92.127	27.192	61.684	25.232	10.75	56.549	61.221	77.341	59.538	35.114	35.454	7.083	42.527	27.042	9.267	25.964	11.245	19.094	72.728	59.0722	58.824	63.8	29.427	121.381	15.602	76.243	17.677	33.28	17.198	61.391	22.009	20.387	57.425	50.449
36.507	98.277	45.777	38.834	5.641	18.066	15.207	33.636	94.768	38.914	34.991	38.202	26.568	36.918	5.742	48.951	52.502	11.973	58.205	31.669	0	65.966	59.648	44.154	38.913	44.031	46.61	0	20.225	40.292	11.257	13.464	11.662	43.261	63.749	62.9784	37.73	63.102	41.979	95.079	15.3	73.296	18.791	41.02	23.49	51.193	31.687	42.033	59.248	39.761
32.921	102.85	55.239	19.383	0.258	11.522	0	26.012	131.453	41.681	41.541	33.257	19.071	32.328	0	43.279	28.589	6.79	56.639	18.952	16.217	72.325	70.129	34.478	32.772	61.023	53.578	7.514	1.048	43.819	15.306	4.248	14.817	62.865	34.836	53.2187	24.75	60.131	31.228	60.996	24.23	48.647	32.89	18.175	19.684	28.33	48.266	42.538	36.222	38.933
18.313	116.51	46.85	13.961	5.568	0	15.92	15.729	110.006	41.064	54.654	28.988	34.643	25.237	3.376	42.686	15.56	5.378	31.747	4.351	15.416	59.184	69.913	28.6	55.223	49.014	24.5	19.818	0	9.517	0	3.283	24.579	73.775	13.74	40.6805	23.703	58.588	23.292	33.879	9.534	40.281	53.37	16.197	7.325	28.164	23.005	56.091	37.352	38.542
18.122	108.135	47.283	2.377	21.551	23.7	24.278	24.554	75.672	40.564	51.712	14.371	36.652	29.803	16.042	61.378	34.26	10.594	36.389	6.792	9.725	55.951	61.98	32.008	45.881	50.514	25.442	20.802	0.917	0	1.617	0	29.579	55.625	26.574	41.3472	9.92	69.779	38.242	33.879	0	43.064	61.512	12.23	0	12.289	21.955	82.708	16.702	23.217
19.874	65.934	55.743	17.646	15.399	51.882	25.418	34.956	80.039	14.801	73.348	4.356	34.3	28.724	17.469	60.059	29.734	18.83	50.888	24.038	14.99	68.198	37.404	35.165	33.29	42.731	23.233	16.062	7.269	9	14.836	16.526	36.606	69.425	25.159	29.2657	20.168	78.377	37.31	50.956	1.6	50.149	48.506	3.088	2.998	0	43.495	77.931	24.209	7.338
6.983	59.958	57.794	26.865	6.874	48.809	44.964	43.778	68.824	19.338	84.505	10.539	37.353	17.505	22.166	40.996	33.821	26.536	31.671	30.347	6.833	72.219	35.194	34.702	38.722	49.51	22.156	13.621	11.35	30.16	21.253	15.933	53.954	73.341	20.471	17.4403	17.984	83.127	27.097	74.392	14.266	57.334	44.763	16.148	4.868	15.464	44.128	65.29	36.283	12.237
16.433	69.431	56.176	19.94	5.774	36.623	44.044	11.337	65.37	25.274	82.539	1.906	28.588	26.154	25.725	32.672	32.188	9.345	44.798	44.188	0.995	72.586	31.248	20.096	28.327	43.636	34.409	8.436	20.129	34.243	40.01	18.845	45.677	68.571	11.207	20.9766	41.066	70.909	19.316	60.82	25.489	38.99	35.106	21.903	14.138	14.06	21.572	57.719	34.585	4.099
38.855	71.609	54.479	28.083	4.675	41.615	46.31	0	66.21	13.843	75.25	8.064	26.506	54.095	22.47	32.246	34.546	3.482	32.415	55.552	1.451	47.172	18.074	36.647	28.498	43.66	38.925	11.106	22.593	33.121	18.871	26.687	43.533	57.531	19.921	29.5222	30.466	53.75	14.011	58.196	30.999	42.988	31.298	10.679	8.281	16.753	13.933	42.237	19.587	10.802
30.922	107.77	49.282	26.298	10.2	31.253	43.596	9.896	93.171	15.75	62.449	0	11.807	51.878	21.541	34.641	52.138	5.273	26.227	40.231	14.557	31.864	15.605	40.771	24.061	42.055	23.633	15.299	12.909	55.941	25.142	29.565	51.583	65.384	14.319	35.7433	6.845	47.268	20.329	47.864	27.388	40.688	8.575	10.296	16.884	28.109	0	64.373	13.887	26.222
14.193	89.283	31.612	7.945	6.753	18.233	53.901	25.116	91.741	16.974	59.762	5.022	12.235	30.797	16.159	23.354	47.71	10.512	27.158	20.641	17.238	32.762	15.709	28.74	43.697	41.543	39.564	27.129	18.743	66.196	24.791	14.957	29.817	74.173	22.731	34.8162	0	50.458	10.185	21.359	17.943	35.116	2.05	17.721	6.727	26.791	19.447	74.943	13.596	42.899
0	80.237	40.12	1.537	0	10.989	53.256	24.743	79.278	15.374	34.98	13.296	19.985	21.567	18.648	7.122	11.255	21.502	37.753	14.665	11.646	30.641	38.922	30.741	44.321	48.694	36.645	52.402	30.765	66.159	37.25	7.507	36.048	75.377	30.832	34.2142	22.175	59.963	7.852	24.82	0.331	33.641	18.801	34.504	6.031	30.509	27.424	62.821	16.962	40.698
3.918	95.396	55.82	3.749	10.22	10.315	52.804	30.228	77.441	29.255	27.716	11.439	17.509	29.625	9.967	2.052	11.734	24.515	34.14	19.068	9.769	50.68	41.297	30.029	36.457	33.013	47.493	53.397	31.466	54.835	37.349	3.082	40.808	64.515	36.963	28.7307	18.272	46.937	19.357	21.661	5.854	33.577	20.025	17.95	6.624	32.589	32.301	53.037	15.376	21.959
22.422	90.574	33.83	3.508	20.007	15.775	57.653	27.61	82.772	42.186	28.635	2.415	20.196	12.423	20.134	3.381	22.582	6.4	41.055	20.77	13.014	44.934	30.099	31.961	28.237	11.195	32.669	49.587	28.294	72.544	33.481	17.764	38.69	54.15	25.479	16.3778	25.462	43.877	20.969	35.424	12.725	25.553	17.068	0	7.106	22.895	21.841	70.56	0	29.47
37.738	72.913	28.33	11.019	18.162	18.875	43.547	18.565	75.145	55.27	30.112	1.271	27.463	0.245	22.056	20.909	33.477	9.767	26.244	24.376	18.575	40.745	17.021	21.222	35.337	15.406	19.097	34.01	30.217	83.506	25.525	22.858	29.895	63.645	18.635	0	19.917	36.71	17.242	27.918	8.498	8.281	26.145	7.955	13.2	29.806	8.636	76.699	0.622	20.815
36.912	66.705	28.638	25.065	18.462	10.528	42.385	27.665	56.028	46.355	27.349	3.07	13.9	0.701	23.864	17.641	22.753	13.741	29.686	21.292	17.735	33.165	12.085	5.622	26.075	35.202	30.539	19.651	51.483	78.915	11.685	15.361	34.013	80.715	19.643	13.1307	24.808	31.039	14.386	33.517	15.539	2.803	48.418	18.013	20.476	41.355	7.16	91.446	8.58	20.097
24.253	59.243	20.88	20.57	15.842	5.252	47.228	27.281	50.943	48.553	42.958	1.152	2.49	4.706	23.52	25.263	12.537	19.882	32.882	13.77	25.987	43.769	12.518	10.864	19.687	30.311	32.163		52.297	68.048	10.926	4.452	35.075	98.749	8.678	28.0818	24.268	23.331	4.351	40.491	19.957	15.311	91.774	4.101	34.186	53.445	13	65.203	3.283	25.214
13.22	45.287	16.883	28.074	11.008	5.163	37.313	32.386	53.579	49.954	33.564	4.286	0	0	18.544	7.273	0	28.881	51.027	17.774	28.633	66.801	12.668	24.318	24.583	29.654	30.485		49.095	48.935	27.707	12.503	45.267	112.257	10.717	31.4472	50.025	19.086	0	42.756	14.222	19.276	103.487	3.257	36.192	41.259	19.552	46.046	1.814	35.974
15.575	38.123	13.712	15.046	15.847	20.93	35.42	26.305	52.265	44.943	36.554	5.873	3.932	4.85	20.683	9.373	6.325	38.363	42.43	14.058	38.968	57.803	25.912	21.253	23.308	24.927	31.187		50.994	35.51	22.656	20.904	40.984	109.379	22.039	23.3991	35.138	23.081	2.399	46.823	18.328	8.537	68.754	6.784	35.508	40.339	41.481	33.736	1.803	27.512
17.955	47.02	0.076	17.399	16.599	31.972	21.423	30.683	42.337	36.598	37.297	7.996	0.884	16.674	16.144	8.389	14.85	47.674	50.183	17.453	43.888	29.408	27.831	13.291	54.416	16.305	22.357		54.626	38.864	19.953	21.062	37.473	104.417	25.808	27.8836	25.735	16.725	12.235	34.496	28.298	13.19	67.558	10.164	38.737	49.949	42.986	22.414	11.135	14.161
18.017	50.022	0	10.834	15.784	34.363	17.641	45.853	41.025	23.645	39.347	10.133	2.951	16.542	15.202	11.642	25.34	50.507	32.3	22.106	44.501	15.313	33.282	6.619	51.5	6.475	33.994		52.648	42.385	26.286	15.159	41.926	85.504	24.361	26.5097	21.023	11.624	20.563	43.746	26.914	29.128	72.576	12.038	39.864	44.748	47.101	34.26	9.827	13.651
12.533	53.85	8.7	1.016	22.171	19.461	26.974	50.991	51.255	45.591	22.326	21.499	4.558	15.806	9.943	12.969	35.098	64.346	26.208	29.75	36.346	24.045	28.875	5.4	35.1	13.209	41.316		63.402	40.901	25.582	20.489	49.416	79.253	37.72	22.6584	11.052	6.92	14.897	32.289	12.846	24.28	75.816	15.029	34.947	41.688	35.473	30.306	13.536	18.933
9.946	54.928	12.479	8.008	33.314	16.757	36.243	41.736	55.618	58.173	21.876	19.684	14.726	29.915	15.569	2.222	44.749	68.933	16.254	19.852	38.296	40.601	25.805	0.808	44.307	28.208	27.137		77.061	40.781	21.445	16.891	52.833	75.259	47.589	18.4713	14.683	0.194	12.603	28.171	7.158	8.37	75.856	21.151	26.364	48.111	20.829	23.274	26.034	17.99
12.236	59.019	17.179	20.071	21.084	5.272	40.412	43.63	54.66	52.922	23.413	13.851	12.255	35.017	16.206	12.565	40.851	68.454	23.802	16.843	51.896	35.667	20.474	4.965	33.11	34.317	18.897		68.58	34.27	19.037	19.976	37.385	64.901	28.004	3.5956	32.204	6.227	20.941	25.082	9.748	0.88	82.523	20.435	21.21	46.046	9.939	10.108	34.714	20.072
16.733	56.434	21.941	40.263	24.084	3.06	48.897	46.319	61.087	41.954	31.985	2.131	4.554	31.446	20.804	22.934	34.117	62.596	28.582	25.897	50.841	32.226	16.489	14.302	37.145	18.328	24.479		60.854	38.319	32.17	7.57	41.372	67.631	19.897	2.6085	20.285	15.115	18.238	19.145	7.838	18.423	80.651	27.205	17.941	47.133	4.85	4.672	37.66	16.58
20.786	52.165	24.185	37.711	32.297	0.29	49.001	48.729	38.7	42.253	19.764	1.4	1.671	30.404	23.937	19.249	27.922	68.161	34.114	32.422	51.382	23.991	20.46	11.942	32.256	8.154	20.5		59.778	27.822	35.892	18.321	53.976	67.841	11.165	20.4451	27.099	7.224	7.811	13.873	16.3	30.757	81.778	33.225	18.396	44.898	8.79	4.535	26.127	18.747
16.981	49.02	26.352	33.197	34.392	1.082	64.232	52.936	36.399	39.91	21.918	16.41	8.592	22.224	25.663	25.279	17.052	84.426	14.802	34.92	61.638	15.072	11.84	4.655	19.07	7.412	19.927		58.372	30.239	35.693	30.676	64.177	74.987	6.321	39.6641	26.157	1.409	8.669	6.816	18.493	34.872	90.386	36.704	26.755	43.832	12.984	16.3	36.868	18.867
17.387	46.444	22.698	39.84	31.439	18.18	55.656	57.93	26.838	31.316	22.406	16.622	11.012	23.432	17.428	11.594	26.782	87.294	17.361	19.803	63.613	1.896	7.165	0	14.021	0	18.774		60.786	28.212	36.316	23.573	59.821	64.159	7.014	28.7919	21.296	2.446	7.121	0	19.471	30.173	103.509	15.625	28.277	45.358	31.095	11.131	31.492	25.031
12.507	38.475	14.496	41.077	26.308	11.497	52.999	52.639	42.605	25.688	14.672	27.154	14.263	23.178	9.465	17.149	25.064	86.658	15.226	7.954	79.691	0	3.881	2.866	20.725	9.43	7.083		63.965	27.802	41.979	15.568	62.516	59.08	2.61	31.6729	25.723	6.588	13.49	8.749	28.161	5.369	100.84	28.256	40.473	52.461	34.426	7.338	28.113	27.129
10.488	36.993	20.783	32.705	27.615	15.648	42.523	53.035	38.858	29.207	9.161	9.816	22.499	12.138	7.585	12.847	30.221	88.404	8.484	0	83.415	11.387	0	6.662	21.508	28.344	0		65.27	26.355	61.472	21.373	62.981	64.805	18.801	29.2063	21.07	7.68	21.194	11.887	27.559	0	87.616	29.967	40.167	52.375	31.15	0	15.166	8.622
12.977	41.277	21.984	42.737	18.667	32.847	44.963	60.407	22.657	30.462	20.061	16.759	19.485	12.209	10.012	17.72	26.35	99.4	8.982	4.508	91.296	20.402	1.899	10.063	23.386	32.173	0.537		63.405	39.824	80.624	16.94	52.585	77.623	21.361	22.3663	19.794	0.641	30.368	5.963	30.445	13.99	80.694	46.179	37.252	29.688	20.237	1.818	28.155	2.966
16.607	28.632	25.044	46.124	19.636	30.578	39.66	70.551	23.032	23.556	11.236	14.357	16.137	20.328	8.186	12.821	19.183	89.556	7.963	12.473	96.813	23.925	4.422	8.467	30.474	20.83	2.698		60.823	30.696	97.378	9.44	43.939	79.208	11.957	25.8898	28.294	0	29.98	4.952	28.437	19.37	75.451	37.893	42.728	38.521	23.957	1.863	30.901	1.175
14.174	19.59	19.503	45.671	28.297	20.348	44.99	69.792	14.827	21.578	6.426	4.555	23.464	23.057	18.421	20.085	16.802	74.671	8.855	16.621	91.595	20.522	16.847	8.517	28.041	14.773	16.177		64.805	29.014	99.885	23.099	40.21	76.222	10.563	34.651	28.509	4.759	26.56	2.517	24.472	10.445	71.613	24.117	54.153	42.521	14.988	18.393	19.757	0
23.987	12.38	25.907	45.498	45.574	15.544	46.452	48.162	7.92	14.584	0	6.979	19.831	32.018	23.544	17.699	11.168	67.616	0	19.181	105.532	22.909	20.042	11.806	18.006	14.81	23.078		63.206	36.817	97.129	12.606	35.431	54.699	2.624	41.2741	28.432	5.138	31.038	5.996	14.047	18.107	72.155	20.245	55.891	41.086	21.2	30.779	14.404	6.315
29.738	5.132	19.463	40.841	52.601	21.552	44.902	40.389	0	14.519	7.396	2.339	14.903	28.45	16.304	8.161	9.644	67.036	8.938	11.235	106.152	24.216	20.76	12.975	5.37	18.012	31.672		63.1	36.882	97.889	14.18	29.412	48.226	0	50.2136	22.368	5.946	28.543	9.091	15.273	18.398	63.819	12.319	43.341	36.494	17.937	34.106	21.756	14.367
49.461	0	21.972	48.948	45.497	22.575	33.85	48.363	4.393	0	9.861	3.12	18.437	19.223	18.448	0	14.287	73.941	8.193	10.216	103.416	15.771	18.992	19.014	0	18.819	19.219		54.942	32.92	117.279	27.501	35.727	41.289	7.383	57.0692	20.797	10.05	20.932	11.38	17.3	11.208	66.5	20.099	44.197	24.759	20.691	19.295	27.138	23.203
T21
51.2243	1	40.5929	21.475	154.086	81.5035	181.239	55.575	152.163	40.0294	149.262	153.958	110.556	0	54.0517	242.862	70.99	111.26	65.125	106.958	249.75	1.125	104.909	255.75	151.155	50.0417	191.102	105.223	95.89	107.801	155.111	206.405	122.821	17.3929	112.06	159.479	164.426	163.504	55.128	315.891	135.375	304.55	0	107.01	15.7917	53.5219	312.25	234.921	249.084	65.956
74.4743	43.0625	34.7804	39.6	184.899	75.066	154.364	31.6375	54.101	44.0294	93.575	90.021	78.056	28.6875	44.2392	215.112	97.677	123.572	59.9375	117.395	183.125	30.3125	68.221	171.5	124.592	38.1042	89.977	82.536	97.89	121.051	100.299	98.7173	90.259	17.5179	92.685	151.916	73.051	101.629	52.066	168.516	136.75	240.55	34.9375	90.073	7.8542	56.3344	216.75	166.984	244.146	114.018
54.9243	59.35	49.4429	48.65	200.361	52.8535	113.239	16.65	37.563	29.7794	80.637	41.483	37.556	26.95	85.8517	147.037	100.565	108.06	57.875	122.033	157.825	48.175	72.559	71.7	112.28	11.1667	56.577	82.048	110.39	83.626	103.761	78.3548	57.621	27.1429	88.01	169.354	57.376	66.004	105.278	112.066	145.15	142.8	33.05	92.935	22.0917	91.2219	156.775	147.996	185.984	102.056
29.766	69	66.8846	36.6833	147.669	42.9618	95.572	4.2833	31.705	24.9877	76.012	32.666	27.681	44.3333	80.2184	82.612	73.073	124.302	48.4583	74.833	115.75	28.3333	67.076	33.792	102.53	22.25	43.102	71.431	121.015	61.759	90.403	78.0298	32.696	24.6429	73.727	193.604	49.134	38.212	118.961	96.391	112.333	88.55	28	92.135	40.625	84.3969	110.833	104.254	175.126	109.414
9.0243	39.125	78.8679	22.075	94.436	42.2285	70.114	19.2	0.438	15.7794	79.462	29.383	20.606	33.35	56.6017	61.737	39.29	163.935	25.675	46.733	66.275	18.225	67.709	44.025	91.88	34.3917	62.927	54.023	98.215	53.076	60.011	67.6298	37.571	1.0429	84.31	151.279	27.976	22.454	75.703	83.016	89.225	81.525	42.65	59.285	23.6167	85.9719	59	64.896	138.059	67.431
29.641	29.4167	44.9262	12.5722	60.155	50.3646	60.322	28.6722	30.83	20.8627	53.943	22.805	20.417	34.0278	46.8017	68.043	25.059	98.788	10.7639	24.111	57.569	5.0139	92.215	33.417	62.474	39.1111	60.227	20.709	64.001	45.593	71.028	14.4881	17.432	0.3096	77.421	95.798	7.343	31.504	59.184	39.127	74.5	51.189	26.9444	37.468	22.6528	51.9386	42.069	47.463	112.195	37.928
8.1618	16.1042	23.0721	4.225	50.773	55.4202	48.031	16.9083	14.017	29.6336	44.72	10.062	14.494	46.0208	36.385	56.841	33.782	30.76	19.625	14.187	37.167	0	78.034	22.438	42.322	32.5834	57.706	18.223	46.223	45.738	72.257	0.1756	2.404	9.0596	60.872	27.916	0.197	51.462	54.503	24.349	77.854	61.738	23.4375	24.843	17.6667	47.5844	29.437	52.067	102.98	4.102
9.5636	28	9.0393	6.2964	34.211	50.8428	43.15	10.9857	3.556	24.8865	29.673	3.083	9.324	55.6964	19.4088	43.862	19.615	6.224	15.8571	8.494	25.196	7.9464	77.641	38.196	45.387	29.2203	56.477	14.937	26.658	20.605	49.111	8.8869	0	0	41.31	13.104	2.872	58.254	34.842	12.998	77.964	22.425	28.7143	18.796	9.9167	50.2719	32.411	70.635	82.959	9.617
31.5814	24.0179	2.9679	4.5107	30.068	49.1106	36.257	7.9321	13.574	12.0115	20.923	6.69	9.735	48.875	29.1946	22.683	12.222	9.26	30.0714	14.708	28.339	17.1607	55.516	30.857	46.387	37.9346	62.977	23.027	14.515	7.89	30.45	31.0655	9.089	1.3215	20.685	7.354	2.247	49.04	25.235	6.32	74.964	8.996	27.5714	17.742	1.7381	56.1112	36.696	67.725	59.209	38.099
31.5919	27.9559	8.4017	9.0265	15.535	22.6506	36.842	9.4059	31.987	0	21.166	1.745	14.012	41.7941	41.287	22.575	15.703	16.201	35.0074	9.936	23.625	20.4632	42.453	23.132	37.942	39.6079	47.109	25.583	31.361	6.808	32.802	29.5224	5.6	0.3635	14.428	8.28	3.161	38.21	27.849	2.295	53.029	23.05	19.9853	10.738	14.5123	39.7131	42.831	44.428	81.128	30.765
39.6305	18.0469	21.4835	12.9906	14.82	22.7691	19.208	11.4969	43.882	7.3106	13.684	4.489	9.197	32.8906	37.5673	36.237	11.615	6.916	17.9844	13.067	22.672	37.9688	47.831	9.984	25.499	29.5417	41.149	14.301	39.921	10.567	25.877	29.2173	14.055	2.0023	26.248	11.698	11.332	41.426	29.097	0	33.234	33.441	16.9844	8.151	28.0105	36.3031	31.563	22.28	72.35	6.362
27.3743	19.9625	25.6179	19.8125	14.961	21.516	19.501	12.0625	40.776	15.4544	0	7.796	4.794	39.95	43.0642	21.225	9.127	1.547	5.525	12.308	19.9	30.425	57.509	5.95	16.63	24.8667	19.927	11.698	46.64	8.126	32.699	28.7798	5.108	10.7929	14.622	16.954	20.401	34.592	40.366	6.004	29.8	30.112	30.05	5.16	5.3792	30.0219	24.187	17.796	59.859	13.793
28.583	19.8804	18.4625	18.6435	14.754	31.6557	22.532	7.3087	30.022	16.5729	1.137	5.996	2.915	41.7283	43.1713	20.063	7.419	3.043	9.7446	19.17	12.788	21.375	46.811	9.076	14.802	16.9493	4.857	0	50.629	9.524	34.991	29.47	15.951	5.3712	12.821	20.887	8.176	14.461	52.476	5.386	33.728	20.811	24.6196	0.537	9.2482	33.7502	18.016	32.089	59.095	21.652
39.6902	9.4432	21.0702	16.6341	12.416	44.4353	35.944	2.325	36.254	17.0862	13.751	1.185	7.704	28.1932	44.4494	11.328	1.001	3.158	9.75	13.015	0	28.0114	46.068	2.102	4.644	15.9962	0	1.882	23.856	5.983	35.247	14.848	17.026	3.8247	19.605	17.865	3.369	5.152	45.605	4.232	39.011	7.891	23.4773	0.226	5.4735	30.3742	13.602	22.853	57.095	15.967
30.5472	10.8542	27.5304	10.6938	9.701	35.8473	47.76	5.8042	37.153	31.3419	8.293	0	0.535	36.0521	49.1767	12.529	0	0	11.1979	14.145	2.323	21.9167	66.43	2.854	2.686	6.2605	18.696	8.879	19.411	15.072	32.59	9.1756	17.529	9.9033	17.654	6.323	2.27	16.244	37.17	3.204	48.771	4.352	19.625	0	11.6979	42.5636	0.729	29.161	44.001	18.789
27.1514	14.4896	9.77	16.4125	20.409	28.8056	51.468	9.9292	37.934	22.6232	15.502	2.166	3.139	40.375	36.5934	6.549	4.469	12.25	7.5417	11.875	11.708	26.5417	64.597	7.75	3.54	6.4688	28.977	15.327	11.723	20.009	33.007	1.4048	24.029	12.7158	20.893	0	8.426	25.723	30.607	8.193	41.917	1.352	19.8333	9.979	11.6979	28.6781	4.948	24.202	47.428	25.164
24.9829	4.6293	13.7222	9.169	37.487	27.4001	41.42	5.2603	23.758	18.1328	12.74	9.523	1.849	40.9741	28.0517	22.78	10.037	19.01	0.0733	19.98	16.616	33.056	51.099	2.129	8.866	10.0115	25.322	14.607	8.58	19.831	29.327	10.4134	23.83	10.2119	14.957	1.63	12.012	31.185	15.749	14.05	31.491	6.705	19.2155	18.98	5.0072	23.7288	9.177	29.451	46.239	11.232
11.166	1.2	7.7512	0	41.803	21.5202	41.647	1.3667	17.996	18.2294	3.47	14.583	5.806	54.675	26.41	29.12	22.515	30.785	0	22.058	21.125	32.2333	49.367	1.808	5.955	10.6	24.227	14.965	10.282	19.018	27.953	14.5548	22.421	3.234	13.143	1.046	12.251	37.596	13.686	14.049	16.133	0	22.9333	19.285	2.2667	23.9969	11.942	34.196	37.917	3.314
19.2576	10.9417	7.3429	11.4917	41.328	29.0868	36.314	0	22.113	20.2794	9.204	23.675	1.714	64.2167	26.6684	27.995	19.798	34.518	4.0083	12.75	18.892	35.65	50.017	3.75	6.33	18.1834	25.177	23.256	10.573	5.626	34.569	23.9298	22.496	4.5094	10.377	8.096	5.593	30.654	7.911	4.533	15.292	4.925	18.4083	20.56	0	25.7219	8.333	35.471	30.901	9.373
17.3211	17.3226	11.7139	17.229	31.937	31.1245	21.949	5.2323	16.405	17.9649	6.153	16.188	0	58.5564	31.0678	28.414	26.349	34.292	8.3911	6.527	20.165	26.2782	48.619	1.903	6.74	25.1828	27.824	24.372	3.995	8.644	29.796	26.308	26.144	6.3929	16.116	18.749	11.757	29.657	12.209	9.984	23.21	6.679	19.25	18.433	12.6385	22.4735	3.56	28.441	35.818	6.771
16.8562	16.9861	1.5026	9.7528	21.503	28.8438	14.558	7.7556	22.191	18.1752	12.318	14.611	4.375	49.3403	24.9545	22.161	26.934	41.371	8.9028	5.548	20.236	28.8889	41.173	14.715	8.808	26.1875	18.588	20.015	3.591	12.19	30.93	23.2937	30.383	-62.6071	11.067	13.91	14.607	19.421	10.829	19.704	28.188	4.668	27.75	14.309	6.1667	20.7511	8.597	17.171	38.66	19.255
23.2464	25.25	1.3576	13.4309	9.843	20.305	18.511	8.6485	24.097	18.7426	14.019	13.443	6.953	44.6471	22.1473	20.671	26.556	47.289	17.1471	5.605	17.081	25.4338	33.909	11.257	10.699	23.9093	18.72	20.848	8.831	8.845	27.28	25.1474	30.137	-62.6071	5.751	11.501	17.47	17.592	15.966	16.825	34.14	5.021	35.6765	17.392	4.0564	20.0734	8.228	21.311	48.187	23.096
25.5886	25.5714	0	13.3429	15.59	18.3392	25.753	11.0786	25.934	16.5508	7.18	15.112	10.499	31.5643	30.9946	24.737	20.101	48.21	8.3821	9.047	17.518	26.8964	36.338	5.3	7.951	28.881	24.648	25.891	19.147	7.083	19.761	26.4619	40.942	-62.6071	4.481	9.897	15.155	12.511	20.999	23.33	24.407	3.886	36.3	20.749	6.8274	16.629	4.175	22.839	42.091	21.92
26.0664	23.5	1.1587	8.9553	34.448	27.1943	20.719	3.5816	25.827	12.2268	0.703	15.965	11.753	32.1513	21.7491	20.428	13.733	39.615	7.8289	10.313	22.816	32.5724	48.258	3.566	4.543	25.0878	32.306	15.795	22.752	7.373	9.683	16.9377	51.387	-62.6071	1.474	10.663	21.183	14.497	30.667	17.99	26.842	3.122	27.1316	28.484	2.943	16.6206	0	34.691	31.933	22.772
13.8374	16.7202	4.7834	5.731	30.687	30.2833	19.81	1.8429	13.461	9.8687	5.298	13.351	1.127	34.7083	24.8255	20.838	18.555	31.7	6.3452	11.648	19.869	31.2798	32.016	1.077	2.482	22.2679	26.066	9.306	23.836	3.64	10.748	26.8453	43.125	-62.6071	0	16.348	15.789	21.379	30.92	9.891	25.006	5.36	21.494	24.522	2.9286	13.8671	3.554	25.308	34.804	32.361
7.0823	13.9886	6.2293	4.3784	11.756	30.7478	26.438	6.2227	12.385	8.1714	12.955	9.776	2.675	28.7045	27.1881	11.231	22.416	32.448	9.642	13.293	23.955	28.6136	22	3.636	2.672	23.2292	34.187	10.229	25.816	0	7.617	28.3593	38.651	-62.6071	4.446	26.86	14.511	17.356	30.1	11.652	23.352	3.539	26.1932	15.766	-132.458	13.3117	7.432	21.091	49.612	51.03
17.9194	8.1098	5.6844	5.3805	2.333	28.0035	32.66	9.3098	14.456	10.8038	15.131	14.565	7.074	28.6829	28.6554	7.792	28.414	40.053	8.4726	7.461	18.143	33.6311	22.372	3.134	0	26.0813	52.8	7.202	19.939	3.091	8.41	30.0511	28.943	-62.6071	3.2	28.842	11.816	18.053	39.457	21.266	22.207	1.574	35.5427	15.519	-132.458	12.3085	4.875	22.461	41.163	31.56
28.441	13.3778	12.654	8.1	3.517	28.4979	27.2	5.5278	27.841	5.458	16.309	23.222	9.734	36.25	16.3255	6.535	23.665	47.704	7.5972	0	18.219	31.9528	18.837	7.111	0.497	20.0556	72.233	10.559	16.868	3.165	4.489	25.8104	34.927	-62.6071	7.171	28.01	12.398	16.937	52.989	19.155	23.644	3.178	36.8833	14.485	-132.458	15.8941	9.353	19.674	33.662	13.75
19.8354	22.4333	8.8651	4.8611	6.178	23.7424	21.417	5.0778	25.03	8.6127	12.698	15.977	8.756	35.7083	10.484	9.69	21.843	47.671	9.9361	0.394	17.375	33.2417	14.492	3.633	0.552	23.9167	74.177	10.048	12.579	8.426	4.055	18.0492	36.899	-62.6071	6.749	25.01	11.015	7.871	37.967	16.133	24.65	9.506	41.4111	17.724	-132.458	15.5219	10.147	20.424	30.628	0
11.5381	23.4255	13.3695	8.8181	12.844	22.8918	16.239	12.1255	18.211	14.4549	19.946	13.28	9.742	33.1755	11.3921	9.631	19.381	41.781	15.8963	1.923	9.29	28.6676	10.292	12.33	0.626	30.9327	49.844	7.731	12.06	14.49	3.052	11.3782	41.06	-62.6071	11.47	20.237	17.628	2.882	26.165	19.936	26.952	9.63	39.7606	19.449	-132.458	16.5485	10.965	30.865	44.536	0.999
3.8108	27.9087	19.7035	9.3933	12.874	28.7198	18.648	9.0942	13.062	-66.9706	17.353	17.179	13.671	33.0769	11.3498	11.439	19.889	38.774	16.5529	0.867	21.187	30.6683	22.962	5.577	2.924	22.9552	52.876	6.656	11.529	15.546	0	13.3519	43.936	-62.6071	19.31	21.474	25.791	1.264	15.114	28.367	15.856	11.454	36.9375	19.116	-132.458	14.0556	6.904	31.104	39.546	10.345
5.3193	15.505	21.9479	7.82	9.851	32.2235	14.369	15.25	8.433	-66.9706	20.537	12.213	10.466	23.325	17.5567	5.482	21.075	24.61	13.27	1.998	22.37	32.69	14.259	6.72	2.815	18.9317	46.037	8.628	14.505	12.086	3.071	14.7198	44.381	-62.6071	12.155	27.559	25.761	2.704	18.468	27.546	13.235	24.52	47.835	18.02	-132.458	7.2919	9.015	28.116	31.234	13.801
1.532	11.0962	17.1025	10.7154	19.966	33.3689	16.311	14.176	2.865	-66.9706	15.171	11.67	7.465	22.0625	23.9363	6.852	29.966	22.13	13.6731	5.304	24.149	29.7548	10.697	6.274	3.939	16.5032	26.679	9.685	16.174	9.32	3.693	20.5731	40.571	-62.6071	7.733	23.21	19.83	3.874	24.984	25.574	15.438	13.651	49.2308	17.957	-132.458	5.6181	6.255	26.253	37.445	17.254
6.3647	10.5702	14.6061	18.2974	20.259	27.736	11.721	6.6254	8.246	-66.9706	13.769	15.39	10.784	27.2061	16.4903	2.176	24.045	24.536	12.9189	4.438	29.893	27.7346	4.795	8.785	6.311	22.3509	21.797	10.041	22.201	4.049	8.672	22.725	44.268	-62.6071	12.578	20.758	18.663	4.671	14.922	23.748	14.105	10.717	43.5307	17.319	-132.458	8.3333	3.919	31.129	49.952	28.272
7.4503	0	12.9919	25.6192	13.221	21.5804	3.773	6.3154	10.596	-66.9706	10.262	19.915	9.2	32.8846	6.0517	2.862	28.663	33.178	14.5048	5.323	29.356	30.75	0	8.981	6.612	18.0369	30.179	12.473	20.784	4.513	8.774	24.0731	38.34	-62.6071	17.906	29.316	18.08	2.422	10.469	22.949	20.663	15.372	40.4375	20.794	-132.458	5.0844	7.615	31.724	24.56	23.696
8.2502	2.9828	12.0196	26.3241	1.375	23.3871	5.179	5.7905	11.741	-66.9706	7.978	17.837	8.578	29.7112	0	5.155	39.141	33.027	18.931	6.721	21.099	35.8276	8.698	13.349	5.534	7.8779	42.632	11.926	13.86	11.396	4.072	20.0901	30.48	-62.6071	17.513	32.035	20.542	5.017	11.072	31.77	11.259	17.623	32.5345	19.204	-132.458	1.8969	7.944	32.274	14.364	20.047
5.0445	1.1842	20.0929	18.5912	0	19.9289	9.502	6.757	9.667	-66.9706	4.326	19.552	4.341	25.7895	6.8806	6.961	29.133	26.098	15.4539	11.697	20.989	28.1513	12.641	7.544	6.504	0	51.889	20.975	21.32	12.097	15.58	17.9487	31.681	-62.6071	15.156	28.108	10.391	12.14	9.54	36.112	17.026	15.247	27	16.946	-132.458	0	3.735	22.678	14.014	24.333
4.6071	7.4297	23.9327	21.6938	2.34	11.4137	17.966	7.7508	12.351	-66.9706	9.657	27.036	5.326	22.668	6.2197	4.866	24.291	16.229	18.4375	11.579	30.797	22.8516	10.182	9.91	5.448	6.0339	46.231	21.723	16.503	7.199	15.658	15.6118	38.934	-62.6071	15.665	27.069	15.664	9.703	5.952	32.645	14.418	18.503	27.957	18.772	-132.458	7.1938	1.824	19.366	18.748	32.64
8.2082	1.2742	19.9518	27.9952	10.852	12.1043	8.836	7.5024	15.058	-66.9706	10.081	26.2	10.75	25.4516	5.0759	0.898	24.002	19.022	17.2339	2.869	31.347	20.5403	2.272	13.758	8.199	5.2353	32.695	27.671	21.237	6.87	13.038	19.7677	29.232	-62.6071	20.29	32.354	17.366	8.137	9.257	27.665	15.165	23.018	28.621	19.7	-132.458	3.8687	5.488	15.429	27.269	33.617
5.8599	6.8347	18.3726	32.1975	16.385	9.0374	1.883	7.6958	8.421	-66.9706	6.408	22.337	10.268	27.3136	6.3483	0	21.92	21.137	15.8114	1.481	24.862	17.7479	5.74	10.712	15.14	9.6964	25.663	21.31	15.907	13.231	13.552	16.5828	18.579	-62.6071	13.564	41.566	15.282	3.165	9.848	24.889	12.403	15.436	37.4873	17.754	-132.458	1.8948	10.561	17.809	31.919	18.706
4.9339	12.4632	22.2326	38.8537	16.704	10.6836	2.857	8.8654	10.435	-66.9706	6.269	19.572	7.424	-50.5	-83.6983	-78.013	19.608	20.194	18.5404	5.443	28.449	21.0037	6.527	8.044	16.335	14.2292	18.749	19.664	11.728	11.882	24.534	5.1695	22.575	-62.6071	12.667	44.979	15.172	9.225	11.066	24.06	14.298	17.164	46.3824	16.716	-132.458	3.4484	9.335	17.704	29.231	15.257
2.9175	8.8977	25.6762	31.7212	10.666	7.727	0	10.5106	0	-66.9706	5.982	17.231	3.814	-50.5	-83.6983	-78.013	24.251	15.465	18.9773	8.053	29.045	22.9356	4.636	7.178	23.424	11.5909	22.992	20.53	6.17	13.252	26.853	5.6624	21.416	-62.6071	15.348	36.835	10.04	4.034	7.685	26.092	21.148	19.611	42.7008	19.756	-132.458	12.2151	9.072	12.107	29.796	26.017
0.9535	10.7986	26.329	30.0201	16.003	0	1.277	19.5681	4.854	-66.9706	7.144	13.17	5.58	-50.5	-83.6983	-78.013	30.955	14.878	25.2951	11.521	24.757	21.2708	5.725	15.74	26.589	4.5834	23.824	19.72	10.348	12.37	22.153	8.4847	16.356	-62.6071	24.164	31.121	6.898	10.865	4.388	31.283	14.097	8.633	41.6215	18.423	-132.458	13.4351	9.597	14.924	21.417	26.314
3.1736	12.2428	30.8103	26.4696	21.461	10.3876	8.409	19.3775	7.735	-66.9706	7.467	11.384	1.759	-50.5	-83.6983	-78.013	33.883	15.383	34.9185	15.326	17.466	31.0453	11.159	12.92	27.639	5.4493	23.948	21.33	7.194	9.734	10.14	8.778	19.538	-62.6071	28.792	30.184	10.995	11.526	7.766	35.494	6.667	8.057	41.337	20.947	-132.458	10.3516	11.701	7.448	10.598	24.884
0	10.2316	23.4863	30.4309	14.891	10.3969	7.415	18.8066	7.608	-66.9706	9.196	11.995	0.46	-50.5	-83.6983	-78.013	28.858	11.293	34.3051	16.679	23.294	35.6471	12.762	13.897	21.644	8.3285	23.33	21.036	2.706	6.849	7.034	2.9416	20.744	-62.6071	30.667	40.861	8.591	0	11.168	41.369	0	10.436	44.4596	24.602	-132.458	5.3344	12.184	9.495	5.698	22.144
3.7175	3.9223	30.9037	34.8095	10.275	14.5846	3.057	18.0176	7.595	-66.9706	4.161	10.279	7.745	-50.5	-83.6983	-78.013	28.855	5.848	36.7838	14.792	23.182	30.5642	9.031	12.831	18.348	9.2849	22.436	23.237	3.623	11.453	10.368	5.9656	28.429	-62.6071	27.692	50.165	10.929	2.467	12.55	44.252	1.226	16.597	49.9122	25.223	-132.458	1.8732	12.807	8.837	0	22.091
3.4914	2.3904	32.0792	40.7815	5.519	8.0857	7.451	15.2651	8.793	-66.9706	6.517	10.217	7.782	-50.5	-83.6983	-78.013	25.968	6.989	34.2346	21.285	31.985	29.0942	9.19	6.178	17.907	5.4372	25.847	20.225	7.01	16.854	8.31	5.5075	25.208	-62.6071	30.985	54.755	9.217	9.367	10.645	43.502	2.075	11.399	42.9452	20.447	-132.458	7.1178	15.892	6.957	9.971	40.12
5.8493	7.0192	39.282	41.8564	10.73	7.0932	5.38	17.5878	10.227	-66.9706	6.002	11.676	5.973	-50.5	-83.6983	-78.013	21.868	12.081	30.516	19.455	31.362	21.6122	8.691	0	20.111	2.6603	23.945	20.239	6.627	22.622	10.595	4.3151	25.574	-62.6071	31.288	50.431	5.734	21.959	2.074	39.397	6.535	11.624	43.5577	18.702	-132.458	9.1469	17.083	1.492	20.805	54.975
5.3427	5.0789	41.5041	29.3796	10.5	7.589	9.795	16.598	6.446	-66.9706	3.14	8.78	10.003	-50.5	-83.6983	-78.013	24.641	16.954	28.3586	20.764	31.128	18.0197	12.705	9.694	19.376	4.6601	26.178	20.368	5.985	22.35	10.545	1.7469	29.703	-62.6071	34.182	44.742	0.294	23.06	3.056	38.523	10.822	13.639	40.727	25.128	-132.458	10.0219	12.556	0	31.354	43.479
1.3255	4.128	38.6405	30.0018	11.634	8.6702	8.364	17.069	5.059	-66.9706	1.274	13.282	10.455	-50.5	-83.6983	-78.013	20.353	14.263	23.8214	20.22	26.012	16.6815	15.439	15.339	22.669	9.9643	27.852	19.934	0	23.203	11.23	0	25.526	-62.6071	36.563	42.964	0	14.802	0	41.885	10.414	13.633	42.756	35.177	-132.458	8.132	15.759	4.296	30.891	24.283
Q21
137.417	0	64.6111	125.222	37.0114	72.1471	34.25	51.2583	140.384	14.8021	40.3589	93.3214	60.8462	70.8646	25.9659	134.35	144.033	85.7456	46.9167	22.4917	50.6	76.7679	37.0161	347.026	25.9231	113.323	72.4318	106.679	117.708	116.747	17.2917	9.325	0	46.2375	56.226	202.068	163.437	81.7083	101.406	128.447	77.3226	28.187	70.983	83.0403	17.2112	169.305	85.1389	45.675	31.4205	96.3636
148.292	17.5625	75.1111	108.972	55.8864	67.9596	17.8125	37.6333	87.634	8.9896	65.1714	56.7589	56.7837	23.6771	12.7159	62.787	112.845	88.3706	79.9792	24.8042	30.1	34.6429	27.2036	216.276	59.6731	84.26	90.0568	83.4911	92.395	90.06	21.2917	12.7625	27.5625	38.55	78.1635	171.505	114.25	42.9583	92.2812	88.9471	61.0101	25.937	77.233	54.5403	16.3987	165.242	53.5139	41.55	28.983	86.3011
132.317	28.625	47.2111	87.497	79.9614	34.5971	10.35	20.5083	41.284	20.6271	46.9839	17.4464	36.9962	30.4146	18.5159	47.725	33.333	65.5456	49.8667	16.1167	28.275	52.8679	19.6661	141.101	64.4731	69.398	63.2568	52.6286	71.033	80.172	42.4917	24.775	24.975	39.8875	84.451	150.593	94.012	24.8583	65.6062	76.7971	28.5976	40.012	78.983	40.8903	29.8862	150.58	36.3389	20.4	46.1705	82.1886
104.25	32.5	25.3194	59.555	83.3864	18.7721	0.4583	31.8	57.759	30.3438	14.5672	13.1547	28.4295	23.6146	24.6742	55.933	19.158	39.3289	56.5834	6.45	39.975	30.7679	18.1828	106.734	61.4648	72.073	49.3068	48.7203	34.958	72.164	52.75	28.7	32.0833	20.9458	48.351	133.235	101.27	13.1666	63.5729	57.7388	24.8643	52.562	75.1913	16.957	44.4195	124.555	29.6806	14.1333	78.7538	40.9469
78.242	38.675	10.3861	36.097	59.2114	21.3721	0	39.7333	58.459	23.7271	4.5839	19.8214	16.8462	24.2646	17.5909	26.675	17.283	21.6956	42.7667	6.4667	42.5	16.9929	32.8161	69.801	58.6731	37.248	34.3818	43.0036	30.483	77.822	54.0417	9.1	42.8	11.8125	29.001	101.893	85.537	6.3583	58.5562	41.6221	5.0226	35.012	80.083	20.7403	59.5112	77.555	25.9889	0	56.5955	20.4886
38.056	34.3194	2.5278	20.875	46.7892	22.2304	5.6389	33.8694	41.884	7.8993	7.2339	13.0297	19.0962	20.6146	9.4381	5.197	27.866	8.9123	10.8334	4.5334	37.2528	10.3235	50.7105	30.179	39.9787	15.115	25.7512	8.7064	43.5	55.122	44.5695	15.575	38.9028	20.0708	7.8788	78.832	65.923	1.3472	54.0451	32.3915	5.2254	27.756	65.9274	19.2903	38.9751	65.097	25.5	2.6333	29.3094	17.1553
20.5	18.2708	3.7778	16.097	24.8864	26.0013	22.875	26.3	28.988	7.8646	10.2756	2.7172	15.4712	14.4063	1.9659	3.121	18.512	5.0789	0	12.9292	23.5375	6.2262	27.6203	23.276	23.5898	15.136	38.2443	1.0328	50.395	66.914	19.7084	28.4083	38.2917	36.4042	15.9343	52.776	38.02	0	31.9895	42.1138	14.5101	10.645	72.3372	15.332	11.232	39.034	15.9514	16.55	28.1288	14.6761
24.506	20.9107	18.5575	13.418	13.6007	22.8435	22.4107	19.2047	20.17	9.7664	9.591	0	12.6498	10.5253	2.4302	4.046	12.854	27.1563	1.9881	10.6881	17.5821	0	12.2304	29.383	19.566	19.894	32.5747	0	35.708	63.265	22.4167	27.5214	16.8393	26.5589	14.4581	24.532	33.955	11.3333	16.0669	30.0364	7.0726	3.741	58.858	19.576	29.5148	25.948	8.7996	12.7464	25.3491	15.8815
23.899	23.5536	25.129	17.026	9.8864	22.4507	13.6964	29.669	21.205	5.9628	5.6446	6.25	12.2212	11.5432	0.2338	15.796	13.622	32.942	22.006	12.1703	0.7786	7.1429	4.3375	29.24	22.9588	15.877	50.5747	15.3572	18.565	37.622	25.5953	5.3964	21.1071	13.3625	22.1724	9.907	30.062	9.744	9.9598	22.2864	13.9119	11.633	38.858	16.0046	15.0505	30.466	4.5853	9.7464	29.4026	10.185
30.285	24.0662	15.9935	24.788	10.4085	22.8971	15.4265	21.7142	22.928	2.03	6.6457	15.9023	14.5227	14.8058	2.3483	12.46	13.077	35.1427	21.8285	8.0285	0.975	14.2238	4.9132	27.342	19.7319	5.066	41.0127	28.2815	14.348	39.49	26.7917	11.1779	28.2574	7.5463	23.3069	9.252	4.636	9.223	8.6415	16.2412	16.5947	15.488	19.3359	18.055	3.6009	41.842	8.6683	6.8882	42.2881	11.8562
21.479	16.9375	10.4392	24.206	8.8708	20.3659	22.9844	26.3364	22.228	10.4427	16.7808	25.9308	19.2056	12.2865	5.7471	4.256	7.971	26.6518	6.3229	4.2886	3.225	12.4085	21.0317	32.354	11.095	4.12	28.7599	28.3661	11.802	46.669	22.6823	12.9812	16.6094	0.0187	12.476	7.849	0	7.4271	0	14.869	9.4164	27.359	16.1705	15.1965	14.4612	34.086	2.5764	31.4094	44.9205	5.5355
12.255	17.6	8.2861	37.185	2.9739	8.0346	15.575	24.5333	30.059	17.8021	19.0214	20.1714	16.2837	2.0271	21.5284	0	4.408	22.3831	8.4167	6.7417	0	15.4304	23.9661	31.876	21.1981	8.848	25.5818	30.5786	10.383	45.097	8.6667	0	23.075	0	10.226	13.255	9.212	10.4458	8.9937	21.5221	1.3726	35.837	6.2955	11.1403	17.6237	30.23	2.5264	30.45	30.008	2.4386
1.558	23.1467	7.3937	36.619	3.4136	1.8101	18.0109	26.0735	28.341	18.4054	16.1578	6.0225	14.5419	0.9189	23.5637	3.964	5.142	21.1586	16.6776	2.6928	1.7033	22.1157	18.5378	29.086	20.9992	6.089	17.6111	40.9286	10.626	46.22	0.3895	0.075	11.1141	1.4766	12.5793	2.595	21.464	9.3387	10.5584	18.1101	13.6106	35.475	10.3852	14.9099	13.0753	19.963	10.6932	29.137	43.1596	3.8473
0.894	21.0455	7.3611	15.063	0	6.0789	30.6136	17.8833	27.316	5.1544	12.893	2.2305	9.2894	4.0919	19.6023	10.18	10.34	28.1547	20.2803	4.4917	3.5659	24.0861	20.2888	33.719	18.6958	9.437	17.9318	54.8718	13.049	57.792	0.0758	0.7682	11.1023	4.4648	19.1237	0	22.357	3.7651	8.9744	11.5039	23.584	37.88	14.0853	17.313	11.9726	18.407	12.9003	27.6068	51.1591	0
4.959	11.4792	6.7153	2.701	5.2614	12.2721	27.1979	5.6229	28.03	0	5.7651	7.8006	8.5337	0	22.0492	19.09	4.804	22.7456	24.3542	10.1792	12.6938	16.3929	27.1828	34.589	14.9543	7.386	15.1818	50.0224	15.104	60.226	0	1.8667	16.3229	5.4979	11.3093	9.026	16.635	2.875	10.0624	4.27	15.708	33.75	5.2018	11.1861	14.732	18.722	21.8889	24.4562	49.0663	6.8219
8.646	17.8958	7.5903	2.378	7.5947	10.1679	30.3229	2.1854	27.561	9.3229	3.4527	21.1339	8.867	5.2813	14.768	21.204	0.845	16.9018	21.5417	3.2521	19.1833	8.6221	29.7765	31.245	18.9127	2.948	10.1714	32.6265	7.916	52.518	3.4375	3.1375	17	12.4354	16.3302	18.578	11.937	5.7083	4.625	4.1242	20.9788	31.041	3.3163	17.2174	13.4924	19.482	11.4201	32.0604	40.8997	6.4469
0.908	23.7543	5.8525	6.054	11.1493	6.4488	25.9397	0.2066	26.996	10.7719	3.6822	12.3085	22.4238	6.9336	10.6987	11.484	3.283	15.8146	17.5029	5.8839	24.9233	8.8196	20.9385	24.185	19.63	0	13.4447	28.4803	5.074	55.846	13.5417	0.8164	18.6595	9.8065	15.1096	23.141	3.028	4.76	3.889	1.9643	26.5769	38.071	1.2675	23.4455	0	29.197	26.3199	33.4379	23.6102	7.0834
0.775	31.425	6.6111	7.647	12.6364	6.5388	24.3333	0	28.892	8.5021	9.2922	3.8964	23.3379	11.2313	14.8492	8.508	0	15.8456	20.9	0.375	12.5083	20.7346	1.2328	23.684	7.6731	4.848	11.2901	23.8703	9.725	56.572	19.7667	11.7583	13.6083	7.1125	16.4843	20.176	3.054	4.4833	3.2979	4.5638	11.2393	46.612	11.7413	23.8903	3.6445	28.763	18.4472	32.7167	12.4538	10.5219
0	23.6833	2.1611	6.564	13.7531	9.8554	20.6	2.9083	25.784	7.1604	1.8172	1.6047	19.3962	6.3813	21.4992	4.858	5.933	12.9539	26.0417	0	10.45	28.6429	4.1411	24.484	10.2814	10.24	10.0401	24.1953	16.9	35.497	14.3917	14.4083	10.1667	8.3542	8.8093	15.485	10.795	5.3333	6.9812	8.7304	7.6309	66.929	16.6747	6.332	1.5529	18.605	9.6722	25.5917	10.6622	10.2469
5.602	17.7218	1.0708	5.452	10.5356	7.3245	16.5806	3.8873	25.997	5.5239	0	7.398	18.3623	4.8888	10.9659	2.717	9.057	8.3262	32.1667	6.4312	8.0314	18.2356	0	18.377	6.6167	9.327	0.7423	23.9125	9.696	15.969	17.7917	8.7121	11.4556	12.5439	4.1736	18.064	19.699	8.547	5.503	10.5197	7.1734	77.828	15.2088	0	0.0459	13.293	6.3163	36.8968	14.4931	10.3918
6.952	17.6389	0	9.236	9.4906	4.5985	13.8472	9.175	26.974	17.6563	0.4839	10.9186	9.5059	1.3299	6.5631	1.475	11.04	8.7873	12.4931	10.5056	5.8986	11.2262	2.6272	16.991	2.4023	18.295	0.8485	20.123	8.243	11.483	14.8542	6.0056	9.9028	19.6264	4.101	17.957	15.194	14.9791	4.8229	16.3777	10.0657	95.173	11.2399	0.4847	3.114	11.583	0	41.4458	15.1844	-59.0114
8.38	14.9853	0.6846	5.362	11.5702	0	9.5294	16.523	24.73	7.9271	4.506	16.5126	1.28	5.2028	7.0468	9.115	9.327	11.253	7.0932	14.8888	10.2103	6.9076	1.2661	9.872	1.5996	22.124	5.3436	14.0242	14.046	29.747	14.3726	3.6265	9.7721	17.3772	7.0422	22.59	9.952	17.1789	2.0533	18.9103	5.1608	100.136	10.6742	2.0477	2.2038	15.187	3.4845	32.7338	17.1999	-59.0114
7.567	5.7321	5.3468	9.018	9.2971	4.4042	7.3071	12.9369	17.405	7.92	11.8696	17.2893	2.3891	5.0717	18.7802	5.018	10.969	15.7027	21.9381	8.231	10.875	8.725	7.659	9.458	3.4874	27.577	9.2068	9.7572	11.976	31.593	10.2203	6.5821	11.975	13.4161	11.8296	26.936	6.633	22.5226	2.3491	20.9042	4.7476	90.098	8.633	9.8617	2.7076	21.551	9.6532	20.6643	8.1419	-59.0114
9.687	2.0526	8.9598	10.314	5.6561	6.2721	4.1184	10.3767	12.305	9.0521	17.5892	16.328	16.7673	5.4041	9.1698	3.409	17.204	13.364	18.4759	7.4588	10.9224	10.2876	9.3122	8.881	3.877	20.994	7.3463	10.6325	12.846	16.977	11.7917	9.9763	7.7105	15.0599	15.5221	26.009	16.509	26.1425	6.0904	19.8287	6.7239	65.707	9.8975	14.435	1.3691	20.002	13.9744	15.5763	7.835	-59.0114
8.334	10.9167	14.2182	9.508	3.2495	4.4745	6.9048	9.6273	11.122	19.6295	16.5375	14.0774	18.6974	5.0015	0.9004	3.457	21.652	13.9658	20.8096	3.6405	11.6417	12.6667	5.5518	13.002	7.4826	16.805	8.1997	17.381	10.988	14.36	4.3631	3.4738	7.4405	20.7077	12.107	17.925	22.205	24.5	7.8764	19.5185	7.8226	45.193	6.7806	14.8082	3.0386	19.501	12.7996	23.9131	3.9145	-59.0114
7.428	18.1364	11.1225	0	3.8125	10.7494	15.2557	8.3208	13.736	15.8532	8.6089	9.9748	13.0507	6.5464	0	7.174	21.357	13.1604	21.3372	10.5485	21.2932	9.8986	8.2434	10.111	3.6163	14.079	2.2329	18.582	16.271	24.202	5.8712	3.0352	10.517	20.3795	16.7828	12.824	28.482	22.7424	11.0823	11.8789	12.4476	45.244	7.4773	17.4153	10.1089	22.771	17.5309	26.9591	0	-59.0114
2.887	29.4482	14.2879	0.054	1.9138	13.2752	18.0854	8.1485	15.158	11.982	10.7583	6.8245	11.023	6.8219	6.0574	12.377	14.954	18.9102	18.246	11.4399	19.9384	7.9752	7.388	7.157	4.9414	7.485	12.63	20.1115	13.04	35.305	7.1149	1.7396	13.8567	17.457	25.0522	4.23	36.342	18.2998	9.7172	4.0752	12.3439	41.574	5.983	17.1257	10.9399	22.448	9.3279	23.3427	4.5546	-59.0114
7.989	26.2472	12.5444	4.575	7.5725	10.386	12.9944	4.4305	17.101	12.1604	18.4395	6.3214	8.9906	6.5551	8.4603	13.275	17.027	16.4012	17.6369	9.7778	16.8694	12.829	9.2383	1.984	4.762	10.176	15.1012	19.6842	8.627	21.194	10.8917	8.7139	15.4167	18.3375	17.9232	4.437	32.645	19.425	10.9118	0.8249	8.9698	51.756	4.9774	6.9451	9.4862	19.074	10.6556	22.0389	9.4094	-59.0114
5.573	22.0361	11.8611	8.441	10.9725	8.636	8.5889	12.5361	9.34	12.3049	17.5283	3.4724	8.3795	6.8334	7.2992	11.892	17.544	12.2956	21.6563	10.3834	18.775	20.6846	8.2494	7.601	8.6398	7.104	4.179	22.3453	12.639	16.444	9.9306	14.975	18.2656	22.1153	19.3677	10.632	37.623	15.0639	11.3729	0.2471	8.1865	52.751	0.3163	6.5091	10.6918	12.113	11.6722	19.6722	13.9483	-59.0114
5.194	23.2101	16.7441	7.895	14.6603	15.3865	5.9362	22.1785	7.847	6.4271	12.1328	4.1751	8.7026	8.1465	7.9978	13.448	12.224	16.8573	11.5763	6.6965	17.8739	23.8424	6.2874	14.348	9.721	15.155	1.5568	22.6892	9.205	17.649	11.5789	14.1176	19.0186	27.0354	17.3989	10.028	24.413	21.5913	16.0392	4.3088	14.538	50.839	3.6798	9.8275	5.9905	10.84	12.5166	20.6191	9.4737	-59.0114
10.754	23.7981	14.5294	9.9	8.1124	14.5413	0.1827	22.8256	12.379	2.8454	8.2243	-68.3036	5.577	14.8742	4.3842	3.946	19.254	10.0773	12.3927	17.2657	10.5904	28.2342	10.7421	15.579	6.0529	18.717	2.3356	17.2796	0.934	24.17	13.4119	20.6712	17.8462	35.3	17.0962	6.078	18.557	21.6987	14.137	5.6634	12.8851	51.081	7.6176	-76.9597	13.3891	5.964	10.8216	14.2856	6.4253	-59.0114
9.582	21.375	11.4861	16.637	8.7014	7.6271	1.76	24.0183	10.369	6.0321	7.1289	-68.3036	6.1062	25.1396	4.3359	2.25	19.933	10.2956	14.3617	25.0967	11.025	31.3229	9.6511	17.136	4.4081	18.768	2.3518	19.2686	0.988	17.242	10.6967	26.495	20.07	30.3125	18.426	8.898	10.757	24.0533	11.3953	0.5471	7.6276	56.827	8.778	-76.9597	4.6512	3.52	11.4289	10.345	11.9155	-59.0114
9.08	24.3029	14.4236	18.371	13.1556	4.5558	7.5913	22.9746	12.634	13.9079	3.3156	-68.3036	5.2837	23.73	5.913	5.287	24.071	2.3898	14.9888	28.5494	11.9125	31.6429	12.468	9.247	0	21.121	11.677	21.9623	2.655	9.699	17.5657	21.1231	18.1346	23.9442	13.6395	4.159	11.23	22.0496	7.9251	0	9.5245	49.456	2.8195	-76.9597	6.841	3.185	10.0476	20.6798	15.983	-59.0114
8.448	25.9013	13.7734	16.443	9.6825	2.9322	1.0877	18.0565	7.88	11.9446	4.7865	-68.3036	6.162	23.8514	8.7378	5.493	21.384	0	11.0658	26.1913	11.6592	31.996	12.481	4.015	2.4231	16.812	11.1621	31.1523	0	9.477	27.5417	13.5311	11.1425	20.6673	6.6668	9.11	16.356	23.6469	7.0444	4.4471	14.373	47.553	5.4611	-76.9597	13.3274	0	14.2003	20.164	14.9907	-59.0114
12.96	20.6779	17.9957	11.568	12.0595	5.3923	2.101	14.2439	4.86	18.3983	10.1474	-68.3036	11.9375	34.146	10.5188	1.552	27.951	1.2216	13.008	12.6936	11.7298	30.3785	13.9248	7.137	1.6731	8.371	3.0135	34.1882	1.996	0.228	24.8734	6.1231	6.1683	23.5212	0	9.616	21.211	24.2275	6.8519	3.2019	15.4043	41.576	7.7186	-76.9597	7.4035	5.699	9.4562	17.9971	14.2426	-59.0114
13.025	15.5172	17.2447	9.886	14.6493	9.1859	1.9871	11.6462	4.953	13.2331	15.6649	-68.3036	10.9669	-61.8854	11.1943	7.846	33.115	0.0258	16.1667	7.5477	13.1776	22.6989	13.7058	8.647	2.311	13.366	9.587	28.6657	7.915	11.161	20.2917	2.1095	-73.625	28.1384	2.4286	8.71	20.868	22.1652	13.0831	6.3695	16.2407	39.954	6.7933	-76.9597	12.2974	6.982	9.3803	21.2009	5.1662	-59.0114
12.807	20.432	11.2953	12.461	15.2833	18.3313	1.0482	15.3548	6.059	9.1815	15.633	-68.3036	12.2716	-61.8854	14.7948	11.738	27.941	7.4737	7.0834	2.0202	17.8917	26.9784	8.095	12.278	5.4626	17.334	13.8945	33.6742	7.109	12.556	23.8882	8.8557	-73.625	30.7375	8.158	8.417	21.751	24.9539	16.5792	12.1532	9.2108	30.444	6.7944	-76.9597	11.3187	10.978	10.1784	15.8877	8.0565	-59.0114
15.687	21.0469	5.4744	7.406	15.3278	14.6862	0.207	15.2974	7.712	8.349	15.937	-68.3036	14.2876	-61.8854	17.5753	13.647	28.256	8.4175	5.6134	2.2808	22.0844	29.9124	6.438	9.26	12.9973	20.389	14.4045	33.0614	7.013	16.325	27.1472	10.5984	-73.625	24.9016	14.5776	11.15	19.64	26.8645	17.6477	12.4198	4.6585	20.023	6.4322	-76.9597	12.1682	12.219	10.5686	12.5734	6.4908	-59.0114
15.288	24.4879	5.8813	3.557	16.0719	8.881	0.5282	19.3389	7.416	8.4513	17.4516	-68.3036	9.4188	-61.8854	21.2683	15.781	34.36	5.544	8.4615	4.0562	18.7492	27.2881	12.0806	5.24	15.7295	12.109	11.6254	32.5496	11.164	17.828	31.0094	15.6556	-73.625	23.2093	13.6413	14.991	20.405	23.176	13.7108	13.8302	0	21.61	5.3701	-76.9597	9.3967	14.745	10.272	14.671	6.6665	-59.0114
11.981	16.7225	6.9586	4.605	15.7656	7.8717	2.1356	21.3727	8.592	7.5585	20.1831	-68.3036	7.664	-61.8854	19.7795	13.217	33.308	2.682	6.9191	5.9048	20.8648	25.662	8.3424	4.698	20.1011	12.304	8.2263	24.4159	11.82	17.02	25.1053	12.0453	-73.625	18.3604	12.779	13.218	18.617	17.2591	13.9964	24.5064	1.5027	26.079	0	-76.9597	7.8489	17.07	9.6982	16.8847	7.9841	-59.0114
17.325	10.2537	9.5596	6.159	17.0702	12.9964	4.1985	21.2987	5.899	4.5705	23.4361	-68.3036	14.3058	-61.8854	16.0578	9.883	44.279	0.8596	-69.5833	5.6535	20.5265	23.2826	6.4462	4.938	20.4305	13.841	1.0531	16.5095	12.539	12.354	26.0013	12.7993	-73.625	23.0904	9.5716	13.939	18.746	14.5723	15.5001	23.0464	2.727	16.477	0.3801	-76.9597	16.2663	12.342	10.7786	16.425	3.5345	-59.0114
14.08	12.6818	7.274	8.597	18.2993	13.5335	3.2917	19.3681	9.645	5.0294	28.3286	-68.3036	19.4674	-61.8854	13.8257	9.725	31.707	3.9501	-69.5833	9.4159	16.8614	24.7073	6.6259	9.723	16.1542	8.899	0	17.4778	8.522	8.05	27.0341	10.8212	-73.625	22.4231	14.8624	11.818	13.354	19.4924	15.1176	18.0039	9.2014	9.755	0.305	-76.9597	13.8817	7.574	10.5139	13.3189	3.4205	-59.0114
13.313	16.0903	2.566	10.736	20.9142	14.4249	6.3229	18.5812	15.113	5.809	27.7547	-68.3036	21.2524	-61.8854	13.6673	8.767	30.2	3.0755	-69.5833	8.9014	11.8882	34.4971	10.1099	4.96	20.3641	4.583	7.0603	17.2724	7.107	7.858	25.9618	10.5681	-73.625	24.9632	16.7677	13.818	6.951	23.2048	18.5706	16.9714	9.1455	2.17	2.5108	-76.9597	10.6452	8.097	14.6979	15.2583	3.8893	-59.0114
12.968	15.8025	2.3104	13.919	16.8121	18.6072	11.0326	17.6895	12.094	3.0684	21.3498	-68.3036	16.4404	-61.8854	13.9188	8.29	26.41	8.9775	-69.5833	5.4138	10.2504	31.9454	7.5342	4.876	17.405	11.915	12.7054	18.809	12.833	3.597	22.9547	8.1837	-73.625	21.2737	21.4343	19.276	12.957	23.7989	18.6719	15.1138	5.5164	0	5.0663	-76.9597	8.6804	9.031	9.1027	17.5355	6.1017	-59.0114
16.88	13.3015	7.4567	17.476	13.9967	28.0699	13.4338	15.7473	5.612	2.7102	18.8626	-68.3036	9.6844	-61.8854	16.9475	9.037	19.57	3.536	-69.5833	2.7564	13.4529	27.5951	9.6926	3.827	19.3974	15.102	16.2553	20.1051	15.712	5.67	15.4718	7.6191	-73.625	18.5463	18.4723	26.329	12.011	15.098	19.1226	15.9802	6.8998	0.514	8.0455	-76.9597	1.5972	8.621	13.0764	15.7154	8.0492	-59.0114
15.593	12.2737	6.7665	18.6	7.7073	32.5626	8.5777	18.9306	8.604	8.096	21.0886	-68.3036	8.4611	-61.8854	18.6652	12.614	20.972	3.1679	-69.5833	5.7383	15.5696	20.7645	11.0093	6.594	19.0819	22.097	19.594	24.3577	16.441	6.409	13.7985	7.2946	-73.625	17.6936	11.0638	25.419	19.515	12.661	17.7076	18.3255	9.6706	5.626	7.1891	-76.9597	0.6774	3.069	15.2335	13.2628	10.5759	-59.0114
20.482	14.8442	3.8234	18.457	9.758	37.9211	7.7842	22.6213	9.062	10.0538	17.2613	-68.3036	1.1715	-61.8854	19.1303	11.122	24.382	7.0435	-69.5833	12.3359	16.8175	23.8501	8.2592	11.415	19.3306	24.071	10.4438	24.4115	16.302	5.502	17.4664	6.0065	-73.625	16.4327	10.214	22.919	16.952	18.3795	18.6202	19.1081	15.0435	13.757	6.4488	-76.9597	1.9972	1.314	14.043	12.276	11.8589	-59.0114
21.157	16.5096	6.4508	21.28	11.5595	37.9708	3.6506	19.6782	6.644	7.4143	24.5961	-68.3036	0	-61.8854	18.9659	13.18	36.754	5.7584	-69.5833	13.4212	10.4045	22.2391	10.3366	8.51	17.1923	16.47	8.7876	23.4671	13.455	8.734	20.5129	10.1263	-73.625	19.7022	18.9504	19.514	18.116	14.7628	20.4466	18.3349	8.7873	14.139	5.108	-76.9597	4.9933	2.228	13.9017	10.3064	14.4397	-59.0114
18.812	15.6414	8.9499	28.271	12.2186	45.3708	4.2895	21.4557	2.203	15.5225	31.8753	-68.3036	4.3199	-61.8854	17.6041	13.271	37.398	2.7588	-69.5833	16.1628	13.0605	26.9817	9.6148	0	22.5152	17.195	1.2279	23.4812	8.938	0.184	18.6404	8.0618	-73.625	22.0961	19.6602	17.154	13.226	15.9155	21.8451	16.8385	7.3752	13.424	6.0126	-76.9597	2.6323	2.585	12.8198	7.7145	16.4139	-59.0114
16.137	9.6994	12.6081	31.496	10.4668	51.2453	4.5863	20.9994	0	13.0581	33.1714	-68.3036	9.1141	-61.8854	18.6385	12.404	30.295	2.1533	-69.5833	10.453	9.0167	26.7084	1.4893	1.02	26.3814	12.487	1.0211	25.9048	10.622	0	23.4286	7.447	-73.625	25.9458	18.0266	17.261	10.196	17.241	21.2849	20.9054	2.8791	9.967	7.2717	-76.9597	1.6755	8.835	12.2222	8.9637	21.2836	-59.0114
[truncated: 263 more columns]

## Sheet: Fig 3 supp-source data 3F
D21
669.699	449.826	517.01	14.7548	163.676	268.222	117.851	176.933	169.502	305.719	151	378.595	297.291	374.117	145.336	259.917	150.5	505.386	206.571	230.507	122	167.456	420.285	60.5357	155.924	152.024	231.697	309.353	301.866	151.818	231.7	116.943	113.366	156.666	148.019	185.218	361.952	208.516	194.835	157.012	291.925	253.525	253.871	360.295	140.825	270.451	263.992	191.125	177.259	704.103
997.636	347.701	383.697	34.7548	155.989	186.66	106.976	210.433	179.189	291.719	179.75	285.282	329.291	470.429	131.648	195.417	228.937	362.386	240.883	223.569	96.375	177.143	438.847	58.5982	147.549	184.024	221.697	501.416	197.679	142.568	213.387	77.568	187.866	111.478	152.706	163.843	272.327	247.641	251.585	148.637	225.425	275.087	217.746	310.608	111.888	193.576	218.804	176.125	156.759	550.853
926.924	225.926	259.835	66.5798	156.051	147.422	95.626	174.108	196.177	212.044	172.875	210.42	337.116	397.217	102.236	161.567	233.675	260.386	212.771	155.357	56.425	126.131	423.235	75.5607	139.199	154.949	145.647	692.328	93.891	101.468	190.775	70.343	215.541	147.316	131.944	133.918	159.702	233.016	298.86	115.587	153.6	229.125	171.921	221.72	154.8	143.626	189.092	173.825	126.059	407.078
726.074	163.243	167.552	82.4215	131.176	112.68	56.101	119.975	168.544	184.344	137.208	133.387	307.583	302.284	101.336	161.417	166.625	193.719	137.738	111.632	46.167	83.706	450.41	97.2024	111.132	74.857	86.864	681.145	70.533	82.568	134.867	52.651	236.741	168.333	90.227	119.01	115.744	166.766	248.835	94.97	93.217	217.317	82.121	162.378	215.45	96.409	133.617	149.208	104.551	306.645
452.149	123.251	109.76	76.8048	126.226	79.397	16.026	65.633	95.877	141.869	91.5	104.47	228.841	208.667	108.811	134.067	99.3	155.436	64.196	79.507	44.475	57.581	265.685	58.2107	110.649	38.349	52.072	520.228	82.966	72.343	85.8	19.243	97.191	162.116	61.919	106.918	80.527	111.691	224.035	61.212	69.775	205.325	55.321	86.12	192.7	71.551	107.992	111.55	96.034	155.253
209.352	97.243	97.468	53.3798	106.162	59.055	26.976	41.169	59.433	95.483	59.958	96.303	118.027	128.617	53.308	87.5	42.236	133.442	22.821	82.479	35.819	27.887	140.285	27.9663	91.271	26.288	50.308	226.645	55.574	60.957	69.186	13.61	44.908	95.499	59.061	89.69	68.396	81.96	148.877	30.804	62.967	122.831	45.427	43.531	182.561	39.882	82.964	102.569	45.537	134.006
136.262	70.014	69.468	34.0048	78.78	34.889	44.497	45.975	26.627	52.073	52.687	61.866	91.874	66.742	36.107	75.709	20.5	142.261	12.113	89.778	29.417	15.248	68.452	24.369	49.987	28.795	27.822	114.749	46.324	46.943	50.533	20.005	32.387	70.041	38.373	71.239	66.119	65.433	88.856	43.491	38.3	69.4	36.683	35.253	78.304	23.972	66.013	82.625	27.863	95.895
105.02	64.219	54.01	21.5941	57.176	22.061	61.69	36.415	16.216	39.612	40.929	41.899	46.237	41.367	16.265	69.238	3.804	136.118	11.892	68.721	16.661	17.206	44.106	9.5536	27.245	38.381	30.108	61.442	37.616	17.764	30.289	12.693	27.562	59.059	32.912	66.879	55.506	73.73	65.139	26.298	39.157	44.007	25.371	28.849	43.629	28.987	59.438	39.696	31.902	55.746
90.324	51.362	46.724	46.9155	61.426	39.758	58.655	29.701	22.02	50.076	23.036	34.72	31.005	36.617	6.193	59.131	0	104.815	17.5	49.632	17.571	6.402	43.535	0	32.763	28.453	36.679	43.067	22.545	21.122	10.7	8.193	26.259	48.541	18.162	50.379	48.023	60.909	76.21	5.423	31.55	22.114	11.925	22.116	26.682	19.13	35.028	26.571	19.563	47.639
71.574	46.267	48.591	64.2622	71.066	26.472	56.52	32.455	24.553	28.3	39.463	36.911	14.49	47.661	1.115	48.049	2.301	84.151	23.115	37.183	10.772	8.346	38.506	7.8666	35.284	26.502	40.741	27.949	19.873	16.024	6.031	5.664	23.344	48.99	22.585	44.409	39.437	52.854	70.136	5.313	22.506	1.701	15.886	12.214	25.891	19.694	24.727	16.522	21.377	38.449
62.262	46.279	56.994	50.6142	49.254	22.456	53.242	25.886	24.955	25.328	28	32.314	13.838	60.758	3.977	32.589	6.25	77.324	19.368	22.648	11.422	6.925	40.988	0.4263	36.471	8.524	23.635	22.728	22.429	17.177	7.122	4.287	8.616	33.682	34.472	48.515	41.468	48.219	60.632	1.387	9.394	1.713	23.996	11.951	17.731	14.373	15.273	11.609	21.087	47.29
47.562	37.526	65.923	46.7048	47.589	27.135	52.201	17.296	24.677	20.194	23.625	32.97	28.266	39.555	2.636	36.417	12.437	62.611	7.833	24.232	11.588	5.556	35.097	11.2107	32.999	13.337	9.23	30.678	16.041	20.318	10.788	9.843	6.816	22.141	42.344	37.918	19.615	54.791	52.623	0	12.913	0	12.921	2.445	16.25	14.876	22.204	14.313	23.909	70.903
45.824	28.119	64.581	59.4342	43.551	16.515	43.791	21.015	40.757	6.279	10.277	37.405	44.318	34.802	8.032	37.026	19.473	50.81	4.332	20.485	3.353	6.429	38.894	18.4107	35.484	33.171	7.447	20.413	31.491	4.438	16.184	14.747	10.698	19.568	46.807	24.272	9.919	58.962	30.253	8.191	14.941	2.786	14.425	3.137	16.863	0	18.731	25.44	1.031	46.315
49.608	30.087	56.953	61.2548	41.199	17.54	29.226	27.194	47.127	3.242	2.295	47.97	33.564	29.162	14.279	36.247	12.193	48.511	11.514	29.143	5.034	21.081	21.285	32.888	26.015	32.41	6.322	21.728	31.23	17.284	16.711	0	17.264	40.223	45.224	14.604	20.861	41.243	23.255	7.944	24.959	2.957	15.269	6.568	12.257	3.11	12.947	27.705	1.486	29.558
53.928	33.576	35.791	49.7548	33.728	17.691	26.903	21.12	63.877	3.906	0	40.71	26.395	23.575	28.211	34.573	6.219	41.73	10.904	24.653	10.667	12.724	17.639	44.7128	38.882	30.972	5.124	25.405	14.887	23.037	8.471	0.922	19.439	49.27	45.269	19.499	15.785	28.391	22.804	8.668	23.185	13.983	19.6	5.493	19.075	22.045	12.221	10.771	9.447	48.29
48.532	45.899	30.031	57.484	29.311	30.91	25.643	28.777	52.367	10.511	1.635	30.793	17.593	26.763	40.18	31.105	0.365	39.574	4.081	25.986	11.667	14.06	16.816	50.9836	38.57	17.034	12.228	31.593	3.731	14.495	6.21	3.214	19.085	42.489	36.79	22.041	15.942	18.756	17.887	8.512	9.883	24.608	18.413	13.003	22.794	31.701	9.742	8.687	4.79	51.207
49.384	37.904	32.782	67.3281	27.353	31.11	28.467	36.903	26.911	14.482	10.142	35.47	5.588	21.772	33.06	29.546	3.332	39.498	4.114	24.059	9.013	6.865	19.501	36.4021	22.808	19.321	9.637	34.469	0	15.809	3.058	16.753	17.517	25.313	35.342	14.64	21.564	10.473	17.512	20.197	10.059	36.585	6.319	15.351	20.605	37.369	7.423	15.159	0	24.452
38.466	27.409	28.368	62.3131	31.684	31.872	16.318	39.225	33.269	25.561	4.517	33.17	12.424	18.734	27.736	36.092	8.325	36.561	23.113	15.565	10.467	0.364	19.16	25.6357	15.024	23.007	10.114	38.086	7.583	12.476	4.575	22.676	28.458	13.416	27.036	7.801	31.552	16.149	18.26	23.429	4.775	30.35	0.871	7.437	19.358	30.551	8.442	11.167	5.301	8.328
37.674	32.268	35.177	66.6381	28.818	38.63	7.068	29.35	44.627	36.502	9.033	30.403	12.691	13.375	19.211	38.475	16.958	34.711	22.029	13.74	12.225	0.123	14.877	16.869	17.532	24.382	11.264	35.17	17.758	6.101	0	19.318	28.766	27.224	30.644	3.701	22.794	1.741	29.835	19.954	1.425	22.267	3.971	7.803	11.525	34.859	10.017	10.442	6.367	13.178
40.8	43.511	38.393	66.1459	26.753	25.303	7.871	16.364	47.853	11.699	7.714	30.914	20.36	8.819	18.013	35.046	25.101	36.684	17.394	17.451	13.238	1.775	13.777	18.0075	12.573	25.093	9.963	25.809	32.402	13.374	5.954	8.435	41.475	25.908	19.62	0	19.484	0	27.557	23.476	8.365	18.936	0	12.775	5.635	41.407	3.903	9.238	1.63	13.543
40.102	28.979	32.628	68.6159	19.482	17.708	21.934	13.523	40.342	4.532	19.958	32.289	13.742	12.145	12.753	17.674	22.687	36.636	14.724	19.382	18.063	2.282	23.889	27.6121	0	35.996	10.551	7.922	38.887	25.992	9.325	6.617	38.831	30.576	14.998	5.371	13.584	0.294	35.543	16.901	4.946	26.615	10.683	18.982	10.853	42.5	6.173	8.424	4.328	7.797
41.287	17.944	29.025	70.1666	13.823	24.546	25.483	7.639	34.568	13.454	20.235	35.051	14.475	24.014	11.689	14.329	25.772	39.121	8.167	18.625	18.706	0	28.506	30.5798	6.578	28.355	12.462	10.419	34.682	30.575	12.222	8.406	43.712	20.372	19.548	16.924	20.864	4.465	22.842	22.115	4.087	20.907	22.268	22.729	8.693	46.995	7.852	0	15.127	0
41.431	12.39	28.592	57.4012	5.28	23.936	29.576	12.937	23.956	11.744	20.039	37.42	19.402	31.11	3.815	14.117	22.446	36.236	3.842	10.243	21.811		27.706	36.7893	2.228	32.899	11.783	22.135	24.47	24.311	15.025	10.614	44.798	8.295	34.865	36.932	10.588	12.916	13.353	24.794	0	19.432	34.671	17.727	3.05	54.383	2.321	9.382	27.795	4.049
45.633	20.55	23.846	54.8798	3.406	7.34	34.463	7.249	26.91	12.219	25.059	32.194	17.337	31.874	0	12.305	24.579	37.031	1.328	0	21.914		17.43	36.2528	4.069	33.932	18.105	21.373	29.517	14.719	19.2	12.904	40.813	13.469	33.598	39.85	10.044	20.786	13.493	34.315	8.155	19.999	23.108	9.65	9.391	46.227	5.196	7.928	53.891	5.452
46.675	24.213	25.397	51.8024	17.444	10.359	18.077	4.963	36.252	14.999	28.256	30.785	15.089	23.986	0.14	11.756	17.554	30.285	0	3.828	30.464		18.077	34.7678	14.001	31.976	13.186	14.174	42.622	12.187	18.748	10.217	31.039	27.422	39.644	37.992	9.845	24.492	25.15	32.542	25.395	26.525	16.657	6.878	8.938	50.82	7.79	9.643	65.33	20.966
51.949	22.934	27.425	41.4991	17.898	10.756	14.879	9.297	27.229	12.816	21.318	26.686	9.763	19.924	0.177	9.667	18.364	30.346	1.031	6.126	29.841		16.109	42.4846	10.799	31.66	12.831	7.194	47.355	6.983	15.41	10.005	33.491	26.371	28.138	32.815	15.196	18.698	26.937	26.035	23.664	25.161	12.093	0	8.694	50.326	11.782	19.767	66.469	28.075
50.214	24.546	21.537	30.5322	10.46	15.96	18.025	10.79	20.633	10.24	16.168	23.202	12.123	16.538	5.763	4.301	19.009	35.673	3.754	13.867	33.924		16.718	35.5083	16.403	39.893	6.356	3.966	46.448	12.05	19.112	23.894	26.229	19.684	28.864	21.584	14.239	16.266	15.466	23.472	30.672	21.397	11.841	6.792	5.84	50.966	12.382	30.716	52.308	25.96
44.385	25.787	17.291	27.852	10.251	16.039	29.815	4.747	19.494	10.444	19.911	18.009	6.305	20.167	10.164	3.717	17.975	30.858	0.127	9.901	27.858		25.102	30.6329	10.416	44.01	10.834	0	41.347	4.207	29.825	26.293	25.824	15.777	21.794	20.624	13.691	18.822	6.221	30.393	37.633	28.497	20.343	18.909	0	45.326	9.475	41.286	44.681	20.7
35.185	23.859	14.091	26.1798	18.54	0	35.115	9.386	21.183	7.766	16.193	12.676	9.044	21.3	9.075	5.95	25.958	24.814	6.377	3.179	22.097		23.335	32.144	5.538	49.466	12.65	7.572	39.285	2.079	26.342	23.226	18.047	9.966	20.172	29.801	28.641	28.044	12.699	25.83	42.133	41.081	31.732	22.27	5.378	47.643	5.759	39.619	40.565	29.606
35.861	24.911	7.598	17.4968	7.136	1.413	23.726	8.462	23.196	10.589	13.641	14.257	10.666	15.463	9.719	9.571	32.418	14.679	11.741	10.629	14.407		21.907	28.299	4.464	45.106	10.053	10.052	31.619	1.488	23.384	18.395	14.927	17.32	32.282	31.628	36.558	21.894	20.854	21.653	30.018	41.19	35.759	19.713	10.95	46.044	2.843	28.705	27.573	31.005
41.459	22.903	7.981	9.3413	6.815	15.885	29.149	12.145	21.108	18.464		15.855	14.555	17.252	9.269	8.898	24.986	18.333	9.1	17.05	14.317		27.006	34.3674	5.987	44.995	3.418	15.117	33.525	0.717	30.234	19.828	13.169	10.2	34.442	35.468	32.438	20.617	21.984	22.3	20.805	43.91	39.977	15.338	17.647	44.6	12.617	22.341	34.067	23.536
49.819	23.186	20.965	10.0798	11.166	27.237	30.706	12.723	9.512	9.899		19.665	23.526	13.292	13.501	12.197	23.605	5.411	15.931	15.377	20.125		26.945	29.1707	4.619	38.264	2.602	12.778	34.541	9.853	32.005	16.073	20.931	9.176	37.454	28.598	26.862	26.386	20.625	28.547	14.19	48.33	31.621	19.255	19.57	47.306	19.407	12.79	33.694	29.523
50.439	13.744	15.092	3.9135	12.022	16.03	25.649	11.625	13.05	5.003		28.234	24.887	8.857	13.211	14.768	21.442	4.583	15.369	19.771	27.548		22.771	38.1559	11.91	34.413	0.413	13.901	28.486	11.361	35.238	14.207	23.164	8.469	30.303	24.708	27.64	31.482	26.691	20.094	7.209	35.741	31.39	32.689	15.248	59.437	19.694	14.784	33.759	36.819
49.499	19.58	13.758	3.8886	17.621	11.244	18.994	14.637	12.43	0.414		22.273	14.205	9.626	7.161	8.54	20.143	0	13.097	21.507	30.107		14.083	38.1212	11.65	27.504	1.311	15.031	24.013	10.923	27.575	13.693	21.824	10.868	26.179	23.933	20.426	33.187	20.986	10.826	4.682	28.139	31.051	26.683	11.959	61.251	20.935	12.45	29.426	30.939
42.737	19.869	12.823	0	12.83	8.068	17.606	15.207	10.324	4.647		12.821	8.81	8.819	5.177	9.816	21.937	1.511	15.422	23.954	28.053		10.665	25.0453	17.131	22.803	1.062	16.641	29.063	11.986	21.118	20.433	29.347	16.733	29.615	31.982	23.106	32.333	16.123	6.531	6.944	23.943	37.703	23.954	16.065	56.336	17.526	11.322	23.956	19.036
29.483	25.658	7.019	0.4315	4.167	12.817	14.437	16.709	5.86	3.706		11.642	6.468	5.095	10.422	8.124	28.155	6.545	20.86	23.404	27.81		9.957	13.9236	19.079	16.08	4.869	15.892	33.719	8.296	15.989	22.055	28.155	12.752	31.079	43.722	20.271	26.77	16.801	6.801	19.184	26.538	42.496	20.739	26.209	51.184	25.608	8.892	16.091	3.504
24.583	31.51	1.78	9.9894	3.963	15.297	10.27	18.146	0	12.414		13.575	3.328	1.13	12.152	12.088	28.419	2.754	21.163	16.182	17.086		20.899	7.9721	10.645	17.978	0	23.969	25.596	3.625	11.483	21.206	32.623	10.205	27.061	37.442	25.812	20.687	21.311	1.9	12.217	36.709	39.507	15.394	26.117	46.988	20.264	9.05	15.671	2.153
21.269	20.326	1.213	9.0751	0	15.46	8.839	16.308	2.065	7.821		14.247	2.447	0	14.813	8.487	19.602	2.448	16.673	16.234	20.004		34.832	9.1724	7.631	13.907	1.013	25.154	22.772	4.084	14.891	18.197	34.628	7.287	20.167	35.632	33.03	23.258	18.284	3.949	12.792	36.748	37.144	13.225	32.739	35.963	9.097	14.426	20.251	8.173
23.788	18.786	1.381	6.8758	8.446	21.198	5.528	17.885	3.143	6.848		13.567	3.057	6.823	12.578	11.058	21.931	3.168	10.849	11.164	23.528		30.579	14.326	4.037	14.266	3.294	24.309	28.975	0.604	20.325	18.874	36.729	7.94	23.204	31.613	39.331	26.996	9.613	11.363	14.348	35.271	29.423	12.392	24.381	30.907	0	15.339	39.094	17.418
21.006	18.902	10.86	8.312	15.322	21.527	7.12	12.016	6.449	5.742		11.114	4.026	13.998	15.103	15.226	17.79	5.839	4.287	7.651	20.1		30.416	31.0082	8.159	19.958	6.159	16.817	35.156	0	20.961	16.515	33.004	10.035	13.271	26.739	32.299	24.228	4.574	13.556	17.647	41.309	23.896	16.984	29.658	37.275	0.899	10.871	51.738	32.139
15.199	18.609	8.282	6.1188	8.455	12.446	8.66	8.948	5.252	7.359		8.238	9.787	20.97	18.369	9.296	18.04	10.717	2.975	7.4	20.504		29.575	35.7306	13.788	20.329	9.451	19.875	37.065	1.105	21.226	20.436	25.425	8.64	6.57	26.975	24.548	14.998	2.971		21.249	41.367	22.849	17.648	35.652	42.635	1.095	9.982	48.075	31.713
18.267	22.97	10.828	5.554	10.036	15.233	10.764	6.043	5.218	5.992		8.015	9.102	20.958	27.844	5.034	21.705	6.678	1.026	8.621	18.261		24.736	28.6607	9.163	21.649	14.913	24.614	43.525	5.776	25.518	17.818	24.499	9.874	5.523	27.574	17.691	20.145	8.233		20.781	37.783	26.458	17.575	42.211	48.398	4.621	12.371	35.998	33.467
11.376	17.014	8.288	10.1576	13.676	12.837	5.681	10.127	4.794	5.427		7.623	8.478	21.048	27.76	5.091	20.75	17.653	6.411	9.285	14.198		22.292	33.1989	8.733	15.382	14.037	25.429	39.578	8.311	20.731	14.158	25.185	8.35	15.304	25.156	20.421	21.259	5.463		19.036	32.591	25.458	10.84	39.964	44.239	6.28	16.205	23.669	39.666
15.252	17.985	6.954	12.0755	12.812	14.588	7.121	12.652	5.163	0		3.72	1.42	23.987	22.637	0	23.154	14.603	10.053	12.717	10.197		14.093	41.2658	14.266	7.41	21.324	30.992	37.074	9.054	25.274	12.189	17.553	7.068	20.231	20.78	22.644	21.755	5.246		24.43	30.253	23.005	8.442	33.051	42.366	15.843	22.111	17.241	32.59
13.438	14.506	3.797	6.3541	11.764	11.075	3.233	11.532	9.719	0.59		0.628	1.412	17.929	19.704	4.638	25.86	13.246	10.042	16.669	11.213		13.682	38.2857	12.891	5.583	21.257	23.64	37.796	20.072	26.476	7.759	14.84	1.291	10.729	20.659	15.647	23.314	0		17.94	28.959	22.768	9.626	36.417	33.727	12.308	18.901	17.961	28
13.513	8.968	6.588	3.4811	10.078	10.587	0	8.423	10.644	7.709		2.176	0	20.935	18.562	3.268	24.936	3.528	8.561	10.075	6.503		4.197	35.2756	12.951	7.338		21.961	40.967	10.348	25.159	11.342	14.464	0	3.37	21.478	19.803	15.479	1.72		13.797	31.515	22.064	17.187	30.409	35.738	13.114	32.445	25.938	22.752
10.677	6.59	5.121	3.7462	12.277	9.732	7.021	0.058	10.243	4.765		4.371	4.087	17.775	17.281	2.944	26.837	0.937	10.04	5.877	0.33		3.72	34.2703	8.792	7.509		24.012	45.727	11.986	21.27	13.155	7.96	2.248	0	26.749	17.733	16.485	8.755		16.752	33.963	23.95	23.471	22.217	31.929	13.67	32.622	33.649	16.344
1.27	1.983	0	5.3061	11.381	13.623	2.777	0	12.258	9.011		3.89	8.31	16.569	25.076	3.927	26.237	1.864	8.901	4.392	0		0	30.3049	9.587	6.953		35.917	38.529	8.754	24.722	9.889	7.978	1.262	2.134	25.651	15.449	20.035	16.277		17.749	38.583	26.39	19.01	26.245	36.175	14.893	30.56	33.035	16.241
0.732	0	1.234	7.3699	10.373	12.449	2.861	4.14	14.828	9.643		3.348	7.314	16.551	31.931	8.391	19.937	8.521	8.12	8.096	4.76		1.232	19.0193	10.174	3.024		34.554	32.034	13.726	25.861	7.279	1.327	4.057	10.391	25.429	7.962	21.115	12.634		27.264	40.9	39.943	20.479	28.911	30.944	18.683	24.016	27.197	36.333
0	1.954	8.183	7.1328	12.108	8.032	6.702	9.841	13.826	17.49		0	3.065	13.522	28.788	9.929	23.807	13.279	7.443	13.266	6.723		4.035	21.6994	8.382	0		31.157	33.229	10.36	29.825	9.419	0	0.327	9.817	21.042	0	40.147	7.859		27.952	39.272	45.436	16.61	32.53	29.002	22.891	17.76	26.819	32.538
T21
239.7	133.643	312.91	107.797	282.203	151.988	319.572	94.627	276.152	178.89	162.799	418.939	378.05	151.351	75.77	138.409	153.457	205.369	207.57	159.204	39.6285	155.897	121.363	13.35	254.524	231.846	333.694	139.34	357.691	456.562	143.913	116.803	199.042	227.149	322.774	698.093	434.922	594.211	332.162	335.155	327.967	492.409	161.351	732.684	341.458	417.617	656.526	343.617	275.324	440.934
165.138	172.455	336.098	138.547	272.391	190.363	311.635	124.189	138.964	187.453	132.799	304.314	260.3	123.601	98.083	173.722	134.332	127.869	229.445	105.767	22.2535	145.584	105.988	48.0375	213.836	205.096	330.944	139.778	281.754	294.062	163.225	145.615	185.042	291.649	367.649	782.593	469.359	503.398	143.85	403.218	294.967	468.221	210.788	632.997	249.583	319.117	623.839	340.054	290.074	551.871
114.3	143.243	282.16	136.972	272.303	145.738	231.247	143.477	117.552	240.415	98.574	206.639	205.125	101.101	97.245	135.834	138.307	89.569	192.745	88.479	47.3035	102.622	83.313	44.075	189.324	194.521	292.944	119.24	210.366	205.762	167.163	144.353	215.017	278.399	348.374	686.718	449.947	378.286	176.112	399.38	242.417	403.209	278.476	564.409	192.008	285.542	618.001	277.642	282.649	582.409
59.575	92.018	213.577	124.297	223.411	93.863	168.405	140.335	83.819	278.89	62.507	122.397	154.55	81.184	108.228	122.409	140.499	56.702	139.028	76.371	25.2535	83.189	60.863	47.7667	152.191	145.013	231.152	127.507	157.233	230.395	128.996	98.011	196.167	251.649	269.441	606.551	367.255	301.253	167.412	337.613	140.009	280.951	287.726	556.017	147.916	200.117	489.693	186.45	261.782	482.476
59.275	63.718	173.735	93.847	150.603	53.663	120.897	99.652	42.877	239.89	60.699	88.114	89.35	60.401	83.57	92.534	117.257	50.169	102.695	47.804	34.1035	66.822	46.813	19.675	100.899	90.321	168.269	116.665	109.041	305.612	80.363	65.653	101.967	199.124	189.274	549.143	252.347	195.836	157.437	194.78	86.167	266.034	263.826	376.534	98.958	116.067	436.601	151.117	187.249	303.084
42.144	38.643	135.91	54.533	86.453	44.655	77.614	69.016	30.43	144.265	61.23	51.55	37.564	64.573	66.506	69.228	90.013	51.702	76.473	33.912	29.0591	64.466	31.641	11.1972	79.802	72.665	107.888	55.396	73.51	263.645	32.746	40.997	77.611	183.843	161.941	373.801	237.547	196.364	166.69	91.947	59.8	209.826	161.504	203.198	78.458	91.103	308.679	112.075	118.949	174.642
24.638	18.31	90.556	52.193	70.682	24.426	60.259	44.335	28.027	47.744	65.757	40.085	10.196	57.393	41.666	57.117	103.79	48.202	62.007	33.912	26.566	49.689	23.925	8.85	60.128	58.929	74.527	32.257	58.462	109.708	20.246	22.553	75.292	124.649	103.295	230.093	210.276	188.878	151.433	40.092	42.905	203.097	122.726	78.309	60.083	122.284	245.026	78.388	85.116	115.288
14.164	0	57.66	46.458	51.989	10.827	43.858	32.752	21.259	17.14	81.46	38.26	8.443	39.655	33.609	37.088	46.975	45.798	33.945	24.472	18.1464	71.665	22.845	4.0821	46.81	55.917	46.23	31.215	51.887	67.633	26.734	24.196	55.167	63.185	85.417	156.557	166.047	130.318	141.573	54.726	25.253	123.052	119.547	26.648	40.708	125.492	216.455	67.474	83.913	64.47
17.021	4.768	34.981	49.101	29.632	4.274	39.983	31.073	5.116	2.372	49.21	46.385	8.496	37.619	22.449	23.891	30.278	27.923	12.963	27.972	22.5928	56.129	14.256	0.7607	41.042	51.685	29.14	25.911	22.584	37.348	23.27	20.66	50.667	47.042	49.881	103.861	126.279	88.336	132.644	40.066	27.717	73.588	153.101	0.095	35.887	130.653	181.419	38.153	54.413	74.72
17.376	0.525	42.601	39.481	20.85	8.753	22.212	17.936	9.152	0	26.512	21.204	6.851	41.645	14.557	36.696	32.016	18.751	6.019	24.932	31.7241	38.272	18.304	4.3279	38.406	42.883	26.503	18.796	17.36	26.077	8.398	9.068	33.123	39.37	37.921	75.35	88.223	67.792	136.544	30.648	27.496	47.791	107.638	0	36.737	107.286	159.945	43.595	51.42	84.147
13.512	8.034	36.144	19.719	12.047	4.832	23.385	17.861	12.527	0.968	13.518	16.111	16.378	38.429	17.192	37.972	32.895	11.478	13.617	14.345	33.8785	38.819	23.504	3.5531	16.962	44.971	23.413	26.465	25.363	24.39	1.069	7.491	21.542	46.087	49.149	56.671	69.828	56.836	117.334	40.171	45.779	29.784	65.476	15.184	22.552	101.664	140.167	36.117	10.824	95.45
9.938	21.268	20.448	18.272	16.028	0	24.284	22.215	17.414	3.077	11.274	11.364	12.725	16.126	16.895	17.634	20.432	18.457	14.945	20.704	32.8535	41.135	25.988	0	3.737	36.596	20.019	35.39	22.203	25.925	0.313	5.303	23.305	42.749	38.349	48.28	84.122	47.811	97.262	36.23	44.517	3.209	85.551	23.034	27.508	76.642	128.276	21.579	18.487	94.796
9.667	22.839	25.04	16.705	13.04	1.227	22.751	29.442	18.587	8.472	9.391	20.896	18.218	7.971	21.938	15.904	16.555	12.967	29.075	16.72	29.5579	47.631	37.45	1.2033	4.176	29.656	25.835	27.199	11.142	19.66	0	6.26	26.515	41.258	64.546	60.338	105.069	38.206	85.108	42.313	19.489	4.159	88.9	24.548	44.23	53.405	134.597	37.851	38.416	99.961
10.586	25.223	18.694	6.695	19.737	13.454	17.936	37.945	28.936	8.333	15.14	19.894	9.936	10.237	19.838	22.17	14.457	15.255	31.57	15.852	33.8785	51.999	47.329	8.2818	1.899	33.448	34.978	22.749	13.611	15.028	3.254	6.11	35.019	24.615	49.308	78.377	114.479	47.756	64.469	56.405	8.444	0	84.703	70.036	37.538	36.151	128.208	46.89	42.097	79.468
13.742	22.653	23.212	2.047	21.901	13.113	17.874	34.867	29.933	12.255	6.705	16.627	5.613	17.445	4.687	23.596	19.582	12.265	28.445	27.829	34.2952	29.116	49.488	19.1312	14.024	33.836	37.756	18.392	1.774	5.291	11.455	7.23	33.573	23.68	35.201	62.01	144.432	57.398	46.11	83.374	4.519	18.43	66.122	64.226	40.031	40.242	119.786	28.711	39.605	64.778
13.512	16.06	29.129	6.505	27.026	4.623	8.166	25.752	30.256	12.036	6.07	18.043	5.113	26.872	4.583	25.065	28.853	9.89	21.705	23.402	29.6597	19.928	63.707	18.4542	22.43	20.252	41.829	8.111	2.535	5.822	6.684	4.918	30.188	8.149	39.409	24.676	128.641	79.336	45.162	64.968	12.498	16.565	51.299	44.194	20.031	37.013	106.891	12.586	42.97	47.611
0.519	18.143	34.85	8.37	27.987	2.738	11.473	17.92	25.954	8.981	3.691	22.542	7.175	24.187	2.498	28.681	32.371	6.145	32.367	21.993	30.5897	14.255	76.501	9.2164	25.343	19.842	47.03	5.512	3.075	18.64	1.861	9.846	36.564	2.951	53.214	0.08	112.15	105.517	48.524	59.349	10.82	32.435	49.873	50.266	0.492	21.518	133.953	17.501	28.251	40.731
0	19.218	38.435	3.264	23.803	6.013	19.714	14.719	31.71	10.282	5.707	24.247	0	7.684	3.537	29.217	34.765	9.236	43.878	12.437	28.6785	10.98	66.571	14.8833	19.107	15.429	41.119	3.873	9.574	21.862	8.08	8.361	33.734	9.524	66.057	19.06	90.98	102.228	48.262	69.905	0	43.842	39.476	48.642	0	32.509	116.109	0	22.749	32.176
5.933	17.626	30.152	3.172	25.486	7.93	23.355	16.81	25.919	7.023	9.174	26.814	7.533	4.626	3.453	36.176	21.965	10.811	49.503	11.471	25.6868	15.747	54.355	13.1583	0.491	10.038	23.169	12.798	6.883	17.02	7.605	13.161	31.6	9.674	85.399	22.501	81.005	82.319	51.279	84.83	4.6	52.476	31.651	22.501	30.583	37.709	122.709	19.417	15.316	54.509
9.015	8.966	20.225	10.366	25.235	3.544	23.229	20.635	10.531	6.321	7.779	24.326	14.062	6.956	8.387	29.881	12.61	15.232	33.469	15.144	24.9632	13.361	48.226	12.4669	0	8.745	13.525	14.485	9.437	10.57	5.76	8.884	25.982	19.77	76.242	30.758	64.095	61.142	43.952	71.53	13.257	44.207	22.202	37.769	32.603	49.863	98.353	53.339	15.981	61.333
12.936	12.546	15.111	3.408	20.154	11.738	28.128	15.287	6.909	7.779	4.486	22.856	16.543	14.705	13.596	25.985	7.631	18.945	35.751	16.648	19.9132	15.161	50.446	17.5861	1.962	16.575	11.569	16.097	6.483	8.784	8.205	11.942	30.764	26.628	67.614	39.301	65.714	41.051	44.002	51.759	22.502	36.909	13.99	68.108	39.069	76.992	81.498	53.193	7.227	59.448
17.354	10.069	13.689	11.885	11.438	15.907	24.44	19.252	9.174	8.434	6.637	32.829	5.866	17.336	17.491	24.703	7.656	15.847	24.724	18.175	16.9079	4.353	43.804	12.2691	1.855	14.111	16.738	9.722	8.559	7.356	5.942	10.847	11.402	31.833	67.995	42.196	65.341	40.439	30.978	36.765	23.658	34.747	26.939	82.853	45.87	89.286	92.614	40.485	0	55.846
29.871	8.436	16.653	16.508	16.51	13.045	25.711	16.284	4.981	7.608	7.581	25.503	4.661	23.272	24.374	24.577	19.821	19.805	16.302	19.993	20.3678	3.065	28.299	7.775	6.553	11.935	24.573	18.933	6.645	7.812	6.199	3.639	1.338	23.235	60.067	31.254	75.518	33.672	39.276	26.137	22.153	22.216	25.04	81.973	41.201	86.756	112.758	45.463	5.556	52.838
39.667	7.347	21.535	23.369	14.091	17.054	26.618	15.416	4.02	9.364	6.233	17.814	7.557	14.509	11.987	26.323	18.845	24.323	9.952	29.29	18.043	3.825	20.37	2.8961	7.991	13.635	40.668	20.031	8.125	9.174	5.426	0	9.331	16.129	49.235	15.35	72.067	23.402	34.978	33.727	20.131	35.705	12.713	80.927	38.076	81.314	119.408	39.946	9.969	41.434
31.015	2.268	20.69	22.767	17.715	11.78	20.018	12.835	2.789	6.122	2.109	18.612	5.502	18.714	15.562	28.909	13.85	17.173	5.82	36.406	20.694	6.826	24.411	3.0345	9.5	13.679	27.224	26.935	2.566	13.431	7.312	4.357	0	16.084	76.643	4.343	59.523	32.413	29.251	35.125	23.312	77.076	17.726	62.398	47.452	57.397	139.639	68.403	4.175	35.892
18.433	3.581	16.541	15.024	26.879	7.477	8.697	18.008	8.595	5.083	1.538	9.064	14.408	17.232	20.645	24.574	9.122	8.13	9.343	40.999	12.6399	5.454	20.278	11.2477	12.78	16.801	29.205	34.51	3.242	6.971	8.833	4.752	-234.833	13.944	55.297	5.371	58.752	33.614	31.452	42.297	43.342	104.824	17.982	56.57	68.68	52.015	120.123	64.481	0.994	51.235
13.956	6.137	19.995	20.385	23.788	8.689	4.423	25.511	11.615	5.045	6.302	6.171	13.504	20.308	17.066	21.424	12.317	9.68	11.189	34.567	15.5035	2.51	23.778	17.5787	26.115	21.288	31.401	29.279	7.115	6.361	10.437	8.09	-234.833	20.259	39.433	8.023	70.163	52.848	22.064	46.701	50.711	154.488	14.586	81.931	73.403	51.169	83.98	55.565	12.589	61.583
7.706	8.687	14.343	24.3	19.042	18.327	7.197	16.483	8.246	4.965	7.252	2.35	15.354	15.24	18.645	17.795	12.324	11.313	19.351	21.479	17.5146	0	21.396	23.8639	29.857	21.088	26.422	31.101	8.944	11.656	11.724	4.675	-234.833	18.899	28.816	30.057	71.641	35.003	28.112	26.131	53.411	159.065	24.154	104.209	65.958	46.775	64.807	71.131	37.46	65.692
9.022	18.449	15.116	16.644	12.086	16.099	0.703	16.977	2.391	8.182	1.424	0	24.109	15.984	13.656	16.39	7.479	11.175	22.495	20.223	11.0813	5.055	15.819	25.475	29.641	16.688	20.294	28.057	12.344	12.701	12.58	6.631	-234.833	11.921	7.055	13.518	75.919	40.058	14.601	19.056	47.15	144.359	12.637	105.759	44.908	45.592	62.412	96.031	70.971	71.609
6.679	23.606	13.139	12.587	10.027	17.844	0	13.015	9.173	6.808	2.578	6.572	21.132	12.75	8.624	10.96	0	10.991	23.754	19.845	8.9716	8.862	13.017	21.475	31.891	16.907	14.476	34.016	16.928	13.376	14.615	6	-234.833	1.458	5.375	0	87.653	53.549	1.816	9.152	45.244	127.999	3.423	109.979	55.501	56.955	68.358	117.96	109.194	80.985
11.82	27.451	12.203	13.023	13.568	18.95	5.99	13.723	9.503	5.26	9.761	8.78	-129.575	11.216	6.607	8.173	6.034	14.758	17.209	21.641	7.5852	5.503	6.776	25.1192	36.466	25.144	12.747	42.672	23.994	17.288	15.12	10.409	-234.833	0	0	5.406	82.235	52.524	10.97	4.718	44.919	110.481	0	90.045	42.29	47.319	86.911	105.939	136.887	77.511
10.875	25.388	11.89	13.312	10.913	23.263	8.127	15.757	20.582	6.86	7.089	10.044	-129.575	15.841	6.295	6.939	11.687	24.609	11.96	20.279	9.1485	9.317	15.658	22.97	35.814	16.461	12.159	36.195	20.786	20.897	18.423	10.723	-234.833	7.669	22.139	33.138	61.697	60.891	5.387	0	57.812	84.149	11.016	108.689	29.143	30.112	81.596	96.727	141.829	62.849
5.003	18.888	10.54	21.134	11.823	28.132	3.466	14.646	16.219	7.876	9.198	12.093	-129.575	10.106	5.554	8.606	17.164	21.763	16.171	11.781	9.9025	6.195	24.743	25.624	36.413	19.404	16.026	30.316	21.571	20.706	18.543	12.962	-234.833	16.649	29.591	46.848	68.749	36.499	17.955	5.559	73.231	46.058	12.654	87.439	30.208	14.641	71.108	99.103	141.67	63.655
1.823	15.696	10.436	14.277	16.335	28.019	1.728	13.693	12.889	10.401	7.249	16.093	-129.575	10.842	5.149	12.749	19.207	20.023	15.046	9.89	8.1439	11.772	37.003	28.1987	39.16	14.046	15.523	19.046	18.623	11.944	15.053	15.575	-234.833	22.631	34.964	48.876	47.008	24.608	0	8.762	91.809	54.185	8.2	80.884	41.028	11.001	68.726	80.211	98.392	52.379
1.666	20.181	11.429	8.658	14.179	21.127	4.259	10.425	16.017	18.289	4.544	18.578	-129.575	7.269	14.924	17.947	19.866	18.181	14.31	7.709	9.9266	9.517	37.517	30.4365	36.534	15.976	18.708	12.167	22.205	2.264	16.851	13.942	-234.833	12.26	28.212	61.367	31.691	28.6	1.638	7.992	101.159	60.063	18.409	84.295	21.775	7.925	57.276	86.905	30.858	45.742
7.131	16.057	13.755	6.357	16.423	18.678	3.227	9.17	16.738	18.942	6.769	12.555	-129.575	10.278	15.981	13.137	25.358	8.783	13.005	11.726	4.038	7.949	38.428	27.2552	34.709	13.898	17.53	12.155	16.359	6.161	19.831	14.031	-234.833	11.886	-247.226	61.028	39.288	19.944	4.813	-273.97	111.058	47.017	18.89	90.602	18.445	14.57	44.927	106.199	15.57	46.589
5.976	12.393	7.3	8.163	11.778	25.655	7.122	10.509	17.806	18.445	6.586	8.535	-129.575	11.939	10.149	8.354	26.334	6.145	6.327	12.364	0.3281	15.645	24.087	25.861	29.73	11.445	7.922	15.371	9.351	6.737	16.189	12.711	-234.833	9.456	-247.226	50.209	59.749	15.998	11.807	-273.97	122.914	44.826	27.182	84.98	36.313	8.584	48.471	90.435	7.475	46.691
7.352	13.545	11.234	7.781	10.301	24.371	11.127	12.4	24.57	24.492	6.842	8.005	-129.575	11.597	5.356	5.323	25.16	7.338	9	9.806	4.4566	17.971	20.472	26.5688	33.497	5.061	1.288	15.668	2.925	5.128	10.71	12.365	-234.833	22.063	-247.226	39.714	40.113	30.375	32.885	-273.97	106.635	43.124	31.3	62.86	32.579	14.469	72.315	91.699	4.875	36.739
8.841	9.119	14.442	6.188	12.114	26.444	14.423	4.562	15.031	26.547	4.38	10.254	-129.575	7.424	0	5.486	20.102	7.296	2.901	9.119	6.7333	13.506	17.274	29.4105	27.125	12.693	0	17.409	5.501	7.457	15.308	14.113	-234.833	29.423	-247.226	30.565	15.587	25.776	32.896	-273.97	80.777	31.744	41.851	53.704	39.841	7.27	91.974	108.919	15.397	29.95
7.505	7.601	19.457	5.032	8.067	30.433	14.905	0	10.36	22.002	3.971	7.812	-129.575	9.673	8.111	9.458	14.313	4.242	0	6.422	7.8213	13.073	11.511	31.8394	31.452	15.556	5.465	16.128	10.024	2.32	17.604	15.85	-234.833	33.48	-247.226	17.214	17.034	23.099	44.302	-273.97	85.878	28.701	49.162	49.801	37.873	3.539	77.405	115.373	17.08	26.118
7.108	11.095	4.638	4.727	5.034	31.745	13.032	8.811	13.071	22.32	5.203	7.259	-129.575	10.803	6.024	7.758	9.141	3.56	2.599	4.733	3.0844	7.754	11.448	24.6588	25.557	5.129	10.334	16.461	7.015	2.797	17.237	20.193	-234.833	29.609	-247.226	31.027	17.598	15.715	36.633	-273.97	99.621	31.512	47.421	58.357	32.028	3.157	62.647	116.43	24.761	17.397
15.575	14.984	3.91	6.043	3.483	32.746	9.83	9.15	7.175	17.689	8.06	8.806	-129.575	17.408	5.74	0	10.086	3.748	10.843	5.541	0.9997	14.117	0.746	29.1038	22.861	6.907	13.323	18.113	4.661	9.285	13.087	24.341	-234.833	35.638	-247.226	46.252	11.782	15.866	25.439	-273.97	106.202	20.989	44.87	34.809	25.28	0	45.136	103.174	29.729	10.639
15.693	10.921	0	4.696	5.568	34.408	1.405	8.662	2.649	16.015	8.084	7.442	-129.575	15.598	4.895	0.628	8.12	3.484	16.681	5.992	0	14.508	4.287	31.6	24.264	3.808	16.416	21.722	0	9.895	17.507	22.122	-234.833	40.152	-247.226	53.083	1.262	26.749	35.954	-273.97	107.582	18.635	53.709	28.58	26.823	0.718	43.825	107.659	35.171	15.736
14.269	8.571	2.486	5.893	6.406	38.031	1.085	5.257	0	16.385	3.975	9.885	-129.575	9.764	5.152	2.396	10.185	4.775	16.405	10.3	4.1231	14.5	3.443	26.9533	31.285	0	15.379	15.086	2.599	11.457	14.366	18.702	-234.833	37.609	-247.226	52.28	0	24.039	30.039	-273.97	107.061	21.366	41.567	13.421	41.165	10.738	40.745	85.097	33.087	16.302
14.935	5.797	9.976	0.374	1.225	35.948	6.899	4.009	4.064	18.339	2.85	8.854	-129.575	10.263	4.663	2.365	9.527	4.483	14.544	6.73	3.3454	9.937	5.841	27.839	38.23	4.787	7.672	9.925	5.265	13.764	10.821	19.435	-234.833	42.873	-247.226	49.968	6.536	19.365	28.206	-273.97	122.871	16.457	32.097	12.096	46.818	14.349	32.879	81.771	32.89	28.11
10.757	9.984	14.758	0	0	30.262	8.886	6.147	7.081	18.319	1.998	11.679	-129.575	13.946	4.229	6.058	10.545	5.285	5.303	4.174	8.6116	9.978	10.14	26.2723	36.027	7.36	6.795	10.445	2.536	9.511	7.268	20.188	-234.833	44.804	-247.226	40.441	5.446	28.066	32.341	-273.97	128.741	34.5	23.908	20.41	40.85	6.674	31.371	94.087	41.243	34.522
6.655	10.835	7.379	4.021	0.432	21.957	12.981	4.778	11.241	11.587	6.606	10.781	-129.575	9.796	1.22	6	11.156	5.088	3.928	1.569	11.4727	15.142	5.274	29.4887	31.271	9.598	9.314	7.775	3.956	6.384	4.793	26.875	-234.833	54.807	-247.226	30.471	13.153	26.476	29.573	-273.97	126.748	46.933	18.021	46.823	30.746	12.18	10.606	94.362	57.87	24.114
3.248	13.839	1.08	6.361	5.283	24.671	14.463	3.021	11.21	11.733	4.219	8.57	-129.575	10.085	6.241	3.531	8.938	0	8.102	1.393	17.7663	11.163	2.302	31.4301	35.155	8.227	10.883	0	5.547	6.479	13.823	32.425	-234.833	57.617	-247.226	20.051	8.403	19.576	30.931	-273.97	122.063	46.685	22.293	65.787	18.971	13.434	0	70.438	70.286	10.213
2.654	20.311	5.591	4.323	9.854	23.902	13.444	4.91	9.33	14.364	0	10.821	-129.575	5.525	5.796	4.666	5.395	1.224	13.225	0	15.7239	13.157	4.09	26.4322	33.61	4.787	13.168	0.939	13.286	1.914	10.821	35.408	-234.833	57.087	-247.226	17.113	7.994	1.589	49.751	-273.97	120.803	34.475	39.275	70.549	34.817	10.775	3.26	44.781	71.923	0
2.135	15.247	7.77	2.467	11.62	26.033	9.992	4.764	6.229	20.304	1.064	12.6	-129.575	0	8.886	8.477	2.826	3.095	17.641	0.82	15.2356	14.983	0	26.0554	30.203	10.281	6.629	6.685	14.248	0	10.356	35.812	-234.833	55.643	-247.226	25.757	2.925	0	67.954	-273.97	134.815	52.576	45.967	51.401	36.509	31.546	1.187	55.441	75.645	4.449
Q21
321.844	595.026	252.856	192.017	103.906	321.187	501.98	371.3	678.593	368.064	235.659	180.757	147.961	772.47	675.747	536.189	842.657	460.435	948.118	765.594	492.197	250.762	550.946	1122.09	299.785	0	317.342	389.338	642.635	544.508	439.458	382.182	461.922	741.754	624.476	688.262	518.691	929.942	508.88	408.226	643.079	129.179	287.917	478.594	714.572	523.178	283.955	512.985	162.836	361.235
235.219	542.026	177.668	152.767	75.969	331	362.542	415.925	581.905	369.439	267.096	152.195	118.773	792.533	704.372	435.064	745.657	405.06	1214.18	886.969	414.76	272.575	497.696	1006.77	300.848	9.9375	251.154	326.4	536.135	595.07	450.896	438.932	469.547	652.504	635.101	605.45	470.878	753.13	641.13	405.476	558.891	62.304	269.479	391.469	468.134	497.303	248.643	543.735	135.711	385.922
205.969	438.351	125.156	122.567	68.531	320.962	256.08	383.675	422.143	260.839	258.384	121.557	154.711	665.945	726.122	432.714	603.682	281.26	1116.64	755.094	393.922	145.587	382.721	799.362	248.41	20.05	210.442	278.388	442.985	542.308	389.808	441.832	417.572	521.679	501.351	483.712	396.716	521.692	623.155	381.626	503.129	37.754	256.017	324.644	431.672	493.678	248.105	433.16	213.436	487.01
175.594	328.693	103.314	124.975	88.364	282.145	217.48	290.717	264.885	178.814	220.159	95.34	149.753	473.47	748.997	530.522	407.99	190.768	753.243	512.719	304.322	99.845	358.279	588.42	199.993	15.125	233.425	231.213	320.218	525.675	292.708	311.557	309.422	408.712	433.518	367.595	275.733	443.109	528.422	306.601	396.412	53.637	307.709	222.177	405.697	467.595	252.747	266.902	157.169	443.61
165.319	308.176	124.406	126.067	63.081	193.837	163.305	198.125	184.568	117.739	182.384	84.932	141.786	299.22	799.847	534.964	292.782	153.11	339.568	354.669	237.047	105.762	276.921	397.537	124.76	10.525	195.967	185.163	208.16	397.408	166.983	212.282	180.897	237.779	339.651	237.812	164.091	366.242	397.03	190.001	292.329	83.154	263.742	162.869	331.547	360.803	186.205	147.11	88.811	295.085
120.719	273.123	90.023	116.35	60.309	133.729	111.702	132.286	156.454	91.578	153.867	64.09	120.628	158.012	476.039	405.064	200.449	132.116	239.299	256.733	160.711	88.97	193.154	246.073	66.716	13.8611	144.564	147.949	157.302	227.508	133.18	152.293	111.95	158.24	277.601	127.956	141.233	283.303	305.116	112.448	247.662	83.36	244.167	126.344	247.489	255.622	137.622	114.638	39.753	239.888
84.948	226.568	55.189	142.496	34.573	72.395	76.251	91.029	126.655	66.272	117.534	43.778	106.336	94.762	275.393	216.689	155.053	106.914	206.993	231.469	156.926	77.72	170.633	164.858	47.556	18.6875	112.884	108.13	128.302	140.758	147.354	91.911	107.36	146.4	227.122	84.262	119.608	284.984	244.693	100.018	205.621	79.012	148.125	60.636	167.53	161.97	155.163	80.756	28.232	164.089
64.88	168.472	51.695	79.249	29.763	58.991	60.123	49.639	94.539	57.796	58.748	19.971	84.747	78.524	187.158	152.528	115.3	101.006	159.529	213.219	141.536	85.548	106.035	115.623	60.071	27.875	74.217	103.82	69.974	97.704	114.887	65.039	98.19	90.2	199.78	42.923	74.334	211.513	209.184	116.851	165.668	72.125	88.56	22.826	125.911	123.232	100.205	79.396	9.925	134.146
54.433	126.347	47.856	77.428	32.085	51.437	53.069	47.979	64.897	39.903	40.088	13.793	86.032	80.595	136.122	111.653	101.693	97.953	144.475	171.737	106.286	77.905	71.035	77.783	56.767	30.5536	64.574	96.338	49.474	64.954	87.44	82.861	78.101	105.29	199.315	41.423	45.977	180.049	142.469	108.101	117.793	51.84	91.274	21.808	105.09	88.999	72.687	88.039	4.657	94.699
43.895	58.725	58.385	52.193	6.252	39.341	32.936	50.616	48.931	35.777	31.078	9.831	80.49	90.286	85.254	75.373	82.238	85.531	133.655	122.682	62.219	61.813	50.042	51.756	34.792	17.8088	39.563	95.191	50.032	53.14	65.723	78.506	89.716	79.894	188.527	58.997	30.287	151.089	94.784	87.064	95.711	33.76	78.593	18.52	93.278	117.663	72.117	55.654	14.939	58.669
24.985	39.885	41.294	29.126	0	45.578	23.964	48.269	39.531	38.251	32.315	14.679	42.883	71.017	61.341	56.626	77.876	73.513	92.259	77.766	72.056	58.059	32.993	33.837	19.691	18.1562	24.545	75.104	46.307	35.836	59.099	59.073	58.844	34.754	195.226	62.106	23.785	155.333	58.052	81.554	79.267	27.132	40.573	0	81.4	139.787	58.314	23.172	23.18	41.329
23.844	26.339	30.631	24.279	6.856	27.475	19.405	55.5	43.206	35.627	20.234	34.182	13.811	55.182	53.747	54.176	58.507	53.897	62.406	82.519	74.235	50.387	21.921	35.224	18.047	16.6375	40.092	76.213	42.085	43.008	34.945	54.819	30.097	34.104	181.201	94.062	17.266	136.355	53.205	37.838	47.467	13.967	35.105	5.132	63.797	102.303	110.917	20.222	30.136	43.072
31.393	15.858	43.421	23.354	15.281	24.008	12.61	55.882	22.984	36.624	17.675	44.974	12.668	20.66	38.872	40.651	32.402	52.027	64.526	85.985	66.235	60.507	9.604	58.951	15.377	14.6087	57.049	68.11	34.439	31.899	31.197	53.867	13.857	17.705	161.286	70.034	29.468	79.355	56.733	8.498	59.981	0	12.069	7.518	47.148	78.091	135.194	19.664	40.51	72.001
31.378	17.094	48.413	26.29	29.622	7.517	12.389	45.686	30.991	25.121	28.057	45.552	17.302	32.243	44.406	30.723	35.566	58.446	55.823	71.503	66.242	62.728	0.219	53.689	26.558	14.2955	52.524	74.304	36.203	37.906	39.185	42.125	22.536	55.538	183.987	34.535	23.089	65.397	82.835	11.192	89.852	20.372	10.269	13.174	51.333	53.519	156.216	3.724	33.643	69.633
31.375	11.234	42.835	40.038	30.896	0	13.813	38.654	39.416	20.231	24.94	45.299	26.951	31.845	39.018	29.71	45.251	39.175	47.503	58.604	67.197	56.564	13.519	49.15	29.191	12.1667	40.144	68.088	29.843	24.883	35.041	30.005	10.818	63.421	176.163	18.345	30.504	80.036	65.297	2.757	78.381	24.71	0.5	12.198	34.093	37.74	139.903	11.006	37.628	50.464
30.417	35.536	46.908	48.913	26.146	1.531	14.824	28.071	48.572	21.762	16.565	33.09	29.899	29.657	50.768	38.345	59.355	35.122	53.545	55.459	67.01	54.335	27.852	45.15	27.702	17.5208	33.675	79.921	40.104	28.977	37.229	25.974	9.089	88.66	173.028	20.783	36.399	103.932	64.078	0.601	55.464	40.929	7.479	24.886	55.957	41.47	115.58	18.495	42.159	25.141
27.443	34.332	53.037	50.508	18.014	5.183	13.083	18.442	36.938	21.577	16.991	20.257	42.944	10.586	35.493	25.624	61.584	33.758	57.303	63.628	73.753	58.059	36.235	38.359	28.341	26.2155	34.971	70.562	38.014	31.836	44.958	34.389	0.982	104.586	166.679	15.581	30.799	116.968	46.281	19.666	51.941	44.364	9.796	31.439	60.288	33.816	121.446	18.739	29.939	34.92
28.044	29.543	39.256	42.642	15.873	12.687	15.505	10.4	33.118	18.047	32.976	16.532	37.003	9.512	26.022	18.372	64.549	38.743	39.451	58.327	60.63	68.862	46.446	30.412	22.718	28.9833	33.784	75.18	39.193	22.333	64.375	32.14	22.23	121.721	154.184	13.445	27.091	109.084	35.647	16.309	47.604	32.546	0	33.052	63.272	32.961	123.463	32.102	28.094	31.318
22.527	21.834	33.756	35.017	16.598	21.279	15.772	18.867	34.685	21.056	38.667	14.974	35.086	13.187	15.564	16.514	76.032	31.202	26.101	58.986	69.055	68.537	29.296	31.912	18.377	25.5083	29	84.838	41.635	16.583	54.966	24.665	27.28	102.846	149.426	14.045	30.683	80.2	19.33	20.493	43.687	13.471	8.434	38.252	60.364	23.095	119.03	29.552	34.486	26.31
20.88	28.554	25.501	37.082	21.216	20.006	11.94	19.49	32.835	23.987	34.744	26.37	31.405	12.49	23.025	15.919	61.726	16.931	17.67	69.497	63.516	70.693	31.063	32.994	11.966	34.25	25.721	90.983	45.079	22.774	40.361	14.851	6.583	78.403	149.286	6.149	16.985	66.015	31.352	11.653	35.232	12.119	17.998	51.417	66.83	31.88	104.407	11.836	27.247	33.199
20.566	33.491	20.898	40.934	23.802	18.166	6.862	20.3	18.822	28.522	31.152	27.076	17.662	15.553	24.928	23.224	42.893	3.685	27.562	81.198	34.787	56.956	25.252	22.788	0	30.4514	20.995	66.407	38.934	18.494	32.694	13.689	15.373	93.865	115.886	3.831	5.163	43.775	44.894	1.15	26.94	13.047	22.202	65.733	57.28	26.289	72.011	28.45	15.211	25.367
22.682	36.327	26.106	36.282	31.399	13.283	7.068	24.682	25.586	20.579	26.909	29.323	2.814	13.058	18.975	31.704	38.995	0.045	40.368	78.851	26.646	38.997	28.997	21.624	3.403	32.1765	18.746	49.169	22.834	15.559	30.634	24.807	11.753	91.828	101.086	17.431	0	27.199	51.674	18.689	4.425	3.017	19.954	59.175	44.41	16.244	67.933	23.978	7.248	38.926
20.34	40.444	19.606	34.646	36.76	9.648	3.709	29.182	32.207	14.818	31.313	29.128	2.19	13.359	26.908	26.8	35.989	10.631	47.2	65.68	33.029	35.494	19.785	19.005	7.874	33.7714	41.406	55.895	33.671	13.787	26.487	17.261	14.393	81.258	91.93	18.333	15.287	41.799	61.019	20.112	0	25.818	18.953	71.68	51.529	12.892	58.555	33.796	0	45.896
13.949	35.783	5.573	31.793	30.926	15.18	0	30.339	30.942	26.906	32.646	23.816	10.303	0.003	30.471	19.393	31.861	27.349	40.473	56.008	37.546	52.505	9.229	14.383	17.864	43.625	47.572	65.213	22.076	12.969	28.294	6.373	25.126	72.958	78.272	22.867	20.908	51.718	83.952	32.279	7.908	47.041	23.055	70.712	52.052	0	44.916	35.071	10.125	47.11
13.487	26.812	2.166	32.053	22.192	9.485	2.569	26.532	33.903	28.874	20.844	24.346	12.592	0	16.366	15.451	49.562	28.328	56.088	35.779	33.518	68.006	25.66	19.813	17.898	40.494	41.604	60.939	19.099	9.645	15.547	5.206	30.696	70.665	65.732	0	33.929	56.353	79.356	32.434	1.661	52.542	24.863	97.374	56.036	9.416	35.354	38.949	13.39	58.348
19.367	13.236	7.186	32.307	37.065	4.335	3.065	22.487	23.36	24.331	17.579	20.479	26.762	5.112	9.525	25.041	71.112	17.662	56.771	23.577	34.879	79.205	37.588	23.206	15.416	46.8352	30.518	63.895	21.146	11.167	9.799	8.233	24.405	80.362	69.885	18.222	36.725	36.885	65.045	16.232	-306.921	49.304	29.343	90.293	53.35	25.559	16.87	50.513	9.433	50.434
17.768	24.992	19.271	35.31	19.824	5.69	2.821	12.785	11.294	19.366	13.619	16.964	33.498	3.827	11.372	20.601	77.703	18.261	50.993	31.106	35.999	72.722	33.23	20.364	18.093	56.1281	16.452	65.149	25.879	7.41	20.452	11.334	18.91	83.8	73.674	38.067	40.7	21.759	59.645	0	-306.921	46.365	33.197	84.143	34.066	53.099	18.114	53.945	14.94	60.043
15.28	27.057	16.362	32.595	17.603	10.845	4.024	16.042	8.36	8.517	9.04	16.774	32.022	14.423	24.3	19.635	72.499	16.46	45.387	36.205	34.489	71.554	29.849	26.084	24.693	62.8056	14.536	70.832	31.563	10.441	26.158	4.738	0	87.018	70.245	63.973	38.333	23.82	43.888	8.32	-306.921	46.254	24.721	78.45	15.461	44.928	33.361	48.121	19.669	65.427
14.052	26.457	19.262	31.395	24.381	4.512	5.236	12.942	8.326	0	17.067	19.168	28.867	20.423	38.144	11.731	51.354	11.171	28.943	50.9	28.389	69.898	25.221	24.64	14.082	65.4	15.242	70.588	28.524	15.452	33.164	3.01	18.505	55.851	88.807	82.923	36.972	34.775	35.355	18.287	-306.921	58.715	24.089	63.688	11.411	35.884	50.255	41.421	30.825	55.238
13.868	23.167	14.457	32.533	28.749	4.046	9.804	10.579	17.04	10.349	16.061	12.613	40.679	25.584	28.175	0	45.41	6.576	30.222	51.014	22.354	69.19	30.071	19.691	13.022	80.016	18.932	70.774	19.22	15.13	30.74	2.741	37.231	76.193	90.106	80.991	30.965	62.649	20.787	40.939	-306.921	57.714	20.045	59.881	15.072	25.322	35.349	52.966	36.48	47.009
10.248	18.372	21.577	26.238	37.247	4.206	14.254	4.093	20.925	20.453	19.346	15.353	36.73	28.379	21.612	-244.436	35.926	1.195	22.512	35.358	11.933	74.387	19.595	17.726	11.28	79.0385	22.034	70.247	25.193	17.998	34.083	6.701	47.855	58.619	80.702	90.305	33.114	68.971	0.87	62.62	-306.921	51.9	25.451	47.214	16.591	19.438	18.267	45.817	39.884	34.711
2.759	9.646	21.121	30.982	28.356	4.287	11.175	0	17.648	16.274	10.764	17.967	38.496	38.11	21.117	-244.436	37.922	0	15.208	28.394	10.252	66.162	15.546	28.672	6.975	68.44	25.737	68.748	25.155	10.433	26.378	13.417	68.782	56.979	66.671	83.192	42.161	79.882	0	71.001	-306.921	47.194	38.337	57.529	24.012	29.093	26.2	55.385	46.676	23.765
0.33	4.185	14.822	31.796	23.497	5.35	12.898	5.165	13.699	19.304	4.164	13.372	26.817	34.465	30.925	-244.436	40.388	9.507	17.046	25.022	14.697	62.132	10.932	33.976	12.174	53.1298	26.919	59.67	10.534	7.325	24.424	15.269	79.36	59.105	52.923	76.945	45.407	68.851	6.553	52.159	-306.921	46.424	46.326	51.171	32.61	16.606	17.311	48.447	71.278	31.298
1.412	10.401	18.874	37.14	20.781	2.9	7.884	4.298	10.439	22.009	4.78	10.814	19.229	41.253	28.675	-244.436	33.203	17.266	30.037	19.572	9.66	53.852	4.181	25.48	21.173	57.6579	11.64	35.684	8.245	10.341	14.862	17.844	63.08	67.397	35.404	52.35	52.75	49.455	13.093	70.147	-306.921	54.931	54.641	34.989	35.633	30.946	17.03	29.733	93.156	24.356
2.921	5.05	17.183	35.753	23.459	3.245	5.148	3.401	10.199	24.29	0	6.651	15.139	40.864	27.011	-244.436	20.667	22.195	26.724	22.368	0	49.57	9.864	24.347	31.218	62.0577	19.121	29.934	0	15.066	4.146	22.302	64.778	55.523	24.76	48.108	37.153	46.788	3.519	71.178	-306.921	64.246	42.879	21.671	45.163	56.635	27.378	25.586	106.822	22.273
5.874	0	15.343	36.974	15.048	6.204	9.691	4.097	21.843	17.025	5.185	7.761	7.935	32.298	18.747	-244.436	13.536	19.862	49.51	31.465	4.529	44.74	19.196	24.902	36.199	64.0862	17.82	29.2	4.256	8.038	11.48	22.604	53.689	47.099	16.916	53.434	32.014	43.265	12.669	71.528	-306.921	55.864	39.296	33.969	36.128	60.269	32.485	21.558	157.483	13.765
5.101	4.142	18.347	32.201	11.022	10.979	10.822	5.679	24.953	21.088	13.784	4.783	0	36.876	14.802	-244.436	10.076	16.661	37.388	27.169	8.901	43.558	17.856	20.256	54.292	62.1535	10.767	35.772	10.666	5.144	13.125	20.871	66.4	28.138	19.184	65.604	38.009	64.701	34.273	51.634	-306.921	54.497	48.049	50.761	35.234	54.744	22.166	25.088	100.95	15.206
8.965	7.147	7.465	29.173	6.742	12.054	4.445	4.71	27.405	12.701	23.37	7.714	9.836	35.185	17.602	-244.436	3.247	19.005	26.075	25.66	19.06	49.567	6.833	17.626	50.89	57.3984	12.955	49.002	16.983	4.356	24.567	18.416	58.356	30.117	25.199	65.082	49.332	78.083	49.7	45.871	-306.921	59.07	54.28	32.543	27.068	43.975	4.58	16.106	83.836	8.051
9.392	6.849	3.618	26.69	8.462	20.292	8.936	7.03	26.194	6.495	23.373	7.132	14.308	31.502	20.727	-244.436	0	19.818	6.219	20.372	11.108	38.806	7.982	19.317	51.543	58.7258	11.765	50.971	14.945	0	24.922	15.247	46.495	14.101	28.649	68.786	56.989	67.873	46.711	50.541	-306.921	69.449	68.957	27.473	11.766	48.13	7.044	18.195	51.784	7.146
10.795	6.71	1.47	24.737	7.955	24.833	8.539	7.641	20.152	14.045	28.453	5.295	18.181	38.485	39.525	-244.436	5.507	10.891	5.069	15.505	15.089	32.595	10.321	21.712	66.817	56.2797	13.6	33.753	17.775	0.317	32.327	4.597	35.664	12.273	17.724	85.588	64.727	56.26	55.836	37.908	-306.921	63.533	75.582	18.348	12.373	40.941	17.019	20.246	47.065	0
11.002	2.228	0.22	26.315	7.215	23.349	6.256	6.329	18.707	21.237	30.898	3.518	16.84	41.36	25.453	-244.436	12.106	4.354	1.011	17.175	19.098	36.49	8.942	11.447	60.954	71.386	11.654	24.827	21.341	1.115	33.829	0.814	27.749	0	17.766	91.898	60.404	60.027	46.248	31.487	-306.921	47.385	-213.083	34.403	10.712	32.696	15.536	14.206	46.229	3.775
14.492	0.518	11.288	22.858	5.508	21.85	2.878	8.728	21.805	6.469	23.292	6.636	21.037	43.485	11.952	-244.436	19.665	11.549	9.304	7.026	23.379	28.114	11.919	0	63.52	72.4924	9.554	13.52	21.15	4.966	29.86	0	26.755	1.652	38.124	98.762	62.183	54.484	43.081	26.412	-306.921	45.247	-213.083	34.579	17.693	33.235	9.705	19.947	44.855	5.087
14.424	3.019	11.714	16.486	6.236	22.652	4.605	15.3	14.787	8.751	18.426	6.111	11.103	49.911	0	-244.436	19.72	13.14	9.066	0	27.187	33.259	12.699	9.9	61.719	76.8507	4.28	8.331	16.399	11.22	19.656	7.179	44.849	4.994	42.57	107.182	54.649	45.015	52.561	21.445	-306.921	38.137	-213.083	11.375	3.76	30.609	18.146	21.867	47.096	12.933
13.922	17.618	3.856	8.597	11.252	32.087	7.683	10.911	9.082	11.732	14.414	8.695	21.682	42.396	4.365	-244.436	25.655	20.165	12.344	12.964	30.884	30.119	12.422	12.821	71.674	74.1304	6.639	0.095	12.023	12.099	6.128	9.533	44.969	8.375	48.797	103.53	39.7	50.692	48.436	21.534	-306.921	36.797	-213.083	7.301	0	44.366	13.053	33.65	46.691	18.936
7.502	20.033	3.617	9.925	17.005	24.496	10.153	9.682	7.336	17.66	16.538	6.036	25.733	44.216	10.247	-244.436	25.995	21.953	11.783	18.399	35.418	17.696	0.247	18.786	68.12	74.7059	12.342	3.095	17.631	6.115	0.138	13.539	34.525	19.107	42.943	98.968	35.919	59.089	48.384	26.204	-306.921	49.8	-213.083	16.785	12.748	28.395	9.15	36.386	64.182	15.514
3.962	16.692	6.143	8.813	19.642	15.42	15.777	9.932	5.654	18.949	21.882	5.811	27.41	52.811	11.433	-244.436	25.853	17.715	9.044	12.861	32.417	2.198	0	15.898	62.511	76.1149	9.852	0	18.507	5.248	0.796	16.56	28.375	22.92	35.185	103.938	35.042	42.368	52.711	18.973	-306.921	54.29	-213.083	16.303	17.477	3.719	4.066	39.353	69.866	21.103
0	7.545	1.424	8.883	14.582	10.257	12.836	10.261	4.072	16.141	13.972	0	28.619	64.057	21.995	-244.436	20.607	25.231	0	4.618	25.521	1.548	6.235	21.424	61.205	79.5595	12.03	10.77	14.878	9.94	4.499	11.038	17.573	23.256	24.574	125.498	31.244	21.706	45.526	26.209	-306.921	49.396	-213.083	7.029	23.959	0.791	0	38.97	73.86	25.415
3.088	5.731	0	5.761	21.303	7.879	11.592	9.508	0	13.099	14.018	2.651	36.163	68.55	29.792	-244.436	17.497	28.759	0.605	4.136	25.088	0.153	3.065	28.343	59.163	82.2693	12.964	15.319	10.603	12.639	0.9	12.131	25.816	26.562	15.559	141.294	33.765	0	33.768	22.473	-306.921	47.307	-213.083	6.309	22.001	1.082	0.878	28.402	69.602	15.132
7.301	4.671	2.274	0	19.725	7.098	7.723	8.231	1.978	16.505	11.462	10.024	25.714	71.871	24.934	-244.436	18.874	27.326	0.085	5.301	23.937	0.476	9.795	21.774	56.094	85.2481	8.349	21.733	11.283	14.018	2.284	14.12	17.425	31.149	3.739	153.022	46.365	14.771	30.495	20.404	-306.921	59.001	-213.083	19.15	15.894	7.8	8.235	16.807	61.632	4.663
11.618	5.109	6.805	4.841	16.198	9.336	8.114	6.571	6.025	7.558	10.811	10.101	23.146	64.253	22.973	-244.436	4.907	20.42	7.862	3.183	27.06	0	0.645	17.17	54.047	86.6101	0	19.582	14.659	16.63	0	12.027	25.574	28.436	0	154.31	39.45	12.112	36.065	22.967	-306.921	77.468	-213.083	16.424	26.31	8.488	17.648	0	69.398	6.223
[truncated: 163 more columns]

## Sheet: Fig 3 supp-source data 3H
REP1							REP2							REP3
D21 siControl	D21 siPCNT	T21 siControl	T21 siPCNT	Q21 siControl	Q21 siPCNT		D21 siControl	D21 siPCNT	T21 siControl	T21 siPCNT	Q21 siControl	Q21 siPCNT		D21 siControl	D21 siPCNT	T21 siControl	T21 siPCNT	Q21 siControl	Q21 siPCNT
1.13055	1.0686	3.90799	2.3385	4.36736	1.78957		0.98798	1.00777	1.75128	1.68059	1.88107	1.11841		0.87395	0.750656	1.42044	0.852621	1.21205	0.609516
1.08059	0.838567	3.38422	2.34342	4.6791	1.65981		0.859823	1.0091	2.15166	1.29103	1.79545	1.22329		0.770591	0.671561	1.69777	0.870015	1.27443	0.554338
0.954811	0.594304	4.24356	2.63954	5.43852	2.09483		0.993029	1.00784	2.21411	1.51342	1.95102	1.11294		0.790098	0.631934	1.60222	0.611421	1.22362	0.692416
0.864388	1.11712	3.89994	2.35589	3.94521	1.81746		0.866553	1.16505	2.14138	1.22211	1.93038	1.2242		0.731993	0.596528	1.41978	0.607573	1.36389	0.544503
1.00422	1.03049	4.01246	2.63838	4.30125	1.9636		0.932817	1.06271	2.24446	1.56195	1.8769	1.20052		0.87893	0.574112	1.34758	0.592974	1.34255	0.485733
0.817135	0.675247	3.52988	2.31906	4.35381	1.91464		0.783805	0.994575	1.75898	1.39734	1.82605	1.2457		0.813236	0.66772	1.48156	0.748837	1.30208	0.508244
0.795171	0.615126	3.85369	2.19155	4.65419	4.95543		0.899551	0.924292	1.86473	1.25229	1.77594	0.898891		0.840686	0.70339	1.44776	0.743352	1.30632	0.683648
0.998846	0.67629	3.53572	2.25161	4.01802	5.06318		0.806986	0.887039	1.79936	1.13772	1.86533	0.990349		1.43609	0.828964	1.4442	1.01288	1.34054	0.642409
1.17467	0.96893	2.82692	2.44375	3.81251	5.15594		1.21359	0.733079	1.71516	1.10094	1.91166	1.16277		1.55899	0.49021	1.44216	0.88826	1.2431	0.479602
1.22867	0.804553	3.2786	2.31389	4.36496	4.44851		1.18078	0.953729	1.90309	1.30803	1.91271	1.10729		1.42692	0.62494	1.91243	0.949654	1.23579	0.766828
0.684995	0.743341	3.90097	2.33359	4.99982	3.43792		1.01568	0.799953	1.74059	1.16904	1.84676	1.16277		1.27547	0.600338	1.33328	0.897513	1.28386	0.638545
0.969101	0.939539	3.51578	2.40571	3.80598	4.06928		1.18952	0.803373	1.8265	1.28365	1.81309	1.08531		1.17934	0.619229	1.24688	1.02064	1.19153	0.642409
1.04908	0.707526	2.9349	2.32	5.04673	5.66117		1.14716	0.761	1.65246	1.45904	1.74775	0.928882		1.21478	0.622711	1.28858	0.704082	1.23781	0.756603
1.03636	0.839661	5.42256	2.95114	4.60009	4.43552		1.15399	0.810312	1.81339	1.13275	1.89271	0.947455		1.20756	0.615082	1.22364	1.10044	1.40103	0.597231
0.902282	0.646103	4.35973	2.59164	4.59398	4.50465		0.961127	0.687658	1.81959	1.18109	1.72903	0.944679		1.44293	0.637865	1.5482	1.11794	1.7547	0.628096
0.965861	0.552228	5.53249	2.12809	4.57051	3.63236		1.01071	0.810312	1.95692	1.18299	1.68619	1.08212		0.835142	0.676613	1.26403	0.704082	1.75642	0.591147
0.915987	0.632357	3.95681	2.75056	4.02247	4.23677		1.11295	0.930237	2.19129	0.87594	1.78343	1.01102		0.937899	0.668168	1.28864	1.0324	1.33268	0.575461
0.822019	0.766146	4.00735	2.21673	3.80929	4.59666		1.11978	1.09038	1.95418	0.942852	2.03769	1.00561		0.95713	0.7465	1.35733	0.854535	1.39682	0.621877
0.896235	0.582252	3.89303	2.32476				1.13946	0.97164	1.8902	1.02961	1.97303	0.99691		0.731677	0.916757	1.25944	0.64854	1.59069	0.646662
0.776848	0.89013	4.34293	4.11625				0.861881	0.827593	1.91123	0.876396	1.82325	1.07763		0.822671	0.632227	1.54036	0.91024	1.34959	0.795811
1.20869	0.701931	4.32061	3.73523				1.00769	0.924809	1.91254	0.926848	1.92047	1.20747		0.710597	0.704544	1.28864	0.921124	1.26833	0.658153
1.12671	0.885194	4.34293	3.07625				1.00857	0.606731	1.93547	0.943599	1.92007	1.1589		0.904679	0.82837	1.35037	0.932552	1.16718	0.686439
1.35758	0.476435	3.13333	2.37224				0.91729	0.720806	1.92527	1.0172	1.75688	1.07982		0.762532	0.842413	1.34154	1.6707	1.41367	0.751765
1.04264	0.647317	3.88794	3.28547				0.917081	1.09214	1.92263	0.898329	1.90248	1.03877		0.832157	0.714356	1.26182	0.848148	1.24335	0.600131
							0.912203	0.874279	1.93016	1.02023	1.92596	1.00558		1.06395	0.665165	1.23272	0.832713	1.4838	0.60385

## Sheet: Fig 3 supp-source data 3I and J
Pericentrosomal										Centrosomal
D21			T21			Q21				D21			T21			Q21
PCNT	Myo		pcnt	myo		pcnt	myo			pcnt	myo		pcnt	myo		pcnt	myo
0.98798	0.984934		0.91352	0.795046		1.01165	1.01876			0.87395	1.02956		0.91352	0.972746		1.01165	1.15463
0.859823	0.801471		1.12237	1.15551		0.965599	0.926902			0.770591	0.819815		1.12237	1.06807		0.965599	1.08154
0.993029	0.919485		1.15495	1.22827		1.04927	1.15204			0.790098	0.79935		1.15495	1.11531		1.04927	1.20965
0.866553	0.784342		1.11701	1.23011		1.03817	1.03222			0.731993	0.796565		1.11701	1.26634		1.03817	1.02804
0.932817	0.843545		1.17078	1.02451		1.00941	0.965698			0.87893	1.00791		1.17078	1.01345		1.00941	0.884893
0.783805	0.699058		0.917537	0.81254		0.982056	1.00333			0.813236	0.81677		0.917537	0.846135		0.982056	0.949565
0.899551	0.8151		0.972698	0.797091		0.955108	0.931498			0.840686	0.912494		0.972698	0.852203		0.955108	1.03631
0.806986	0.686811		0.938602	0.892139		1.00318	1.03269			1.43609	1.24296		0.938602	1.24727		1.00318	1.00387
1.21359	1.28683		0.894679	0.866559		1.0281	1.08726			1.55899	1.33139		0.894679	0.976546		1.0281	1.07048
1.18078	1.19065		0.992711	1.12739		1.02866	0.982122			1.42692	1.48917		0.992711	1.32347		1.02866	1.05514
1.01568	0.90941		0.907946	0.858019		0.993197	0.977895			1.27547	1.02113		0.907946	0.885006		0.993197	0.902865
1.18952	1.04564		0.95276	1.02392		0.975088	0.910365			1.17934	0.855374		0.95276	1.08509		0.975088	0.968818
1.14716	1.0952		0.861971	0.836019		0.939948	0.835806			1.21478	0.827912		0.861971	0.757623		0.939948	0.803298
1.15399	1.10687		0.945919	0.860128		1.01791	0.99877			1.20756	1.06746		0.945919	0.935595		1.01791	0.92947
0.961127	0.810388		0.949153	0.865752		0.929879	0.841645			1.44293	1.13689		0.949153	0.870372		0.929879	0.910735
1.01071	1.10715		1.02079	1.12968		0.90684	0.936154			0.835142	0.768135		1.02079	1.09858		0.90684	0.76568
1.11295	1.12383		1.14304	1.25249		0.959137	0.895471			0.937899	1.21019		1.14304	1.24178		0.959137	0.904955
1.11978	1.2842		1.01936	1.12429		1.09588	1.1783			0.95713	1.19264		1.01936	1.08213		1.09588	1.03557
1.13946	1.44741		0.985987	1.05423		1.0611	1.2236			0.731677	0.813972		0.985987	0.814427		1.0611	1.23363
0.861881	0.862036		0.996955	0.987913		0.98055	1.00077			0.822671	0.933997		0.996955	0.942275		0.98055	0.967115
1.00769	1.10841		0.997642	0.993479		1.03283	1.03045			0.710597	0.784837		0.997642	0.924624		1.03283	1.19892
1.00857	1.10687		1.0096	1.01907		1.03262	1.03211			0.904679	1.06432		1.0096	0.988594		1.03262	1.18159
0.91729	0.991166		1.00428	1.02154		0.944858	0.879576			0.762532	0.95818		1.00428	0.896827		0.944858	0.932551
0.917081	0.996579		1.0029	1.02322		1.02316	1.05978			0.832157	1.04943		1.0029	0.867201		1.02316	0.896573
0.912203	0.992614		1.00683	1.02106		1.03579	1.06421			1.06395	1.06955		1.00683	0.928342		1.03579	0.894104
0.87395	0.929806
			1.0134	1.00484		0.898726	0.948602			0.98798	0.87822		1.0134	0.904457		0.898726	0.724942
0.770591	0.822991
			1.21126	1.22731		0.944977	0.888797			0.859823	0.971884		1.21126	1.07714		0.944977	0.965312
0.790098	0.811544
			1.14309	1.36746		0.907305	0.862078			0.993029	0.960091		1.14309	1.30451		0.907305	0.858125
0.731993	0.782927
			1.01293	1.13208		1.01131	0.983642			0.866553	1.24209		1.01293	0.985675		1.01131	0.978215
0.87893	0.802737
			0.961423	0.926501		0.995493	0.968615			0.932817	0.967144		0.961423	0.952259		0.995493	1.10364
0.813236	0.783927
			1.05701	0.962341		0.965484	0.906173			0.783805	0.798765		1.05701	0.908698		0.965484	1.0043
0.840686	0.846719
			1.0329	1.06503		0.968625	0.983003			0.899551	0.758832		1.0329	0.913093		0.968625	0.824679
1.43609	1.38913
			1.03036	1.21039		0.993995	0.916675			0.806986	0.656018		1.03036	0.895853		0.993995	0.947846
1.55899	1.35286
			1.0289	1.00387		0.921747	0.936961			1.21359	1.0391		1.0289	1.08537		0.921747	0.820421
1.42692	1.3557
			1.36441	1.42273		0.916328	0.892661			1.18078	0.999233		1.36441	1.45669		0.916328	0.813243
1.27547	0.939432
			0.95122	0.950694		0.95197	0.916555			1.01568	0.982681		0.95122	0.963177		0.95197	0.956555
1.17934	0.899189
			0.889578	0.850249		0.883512	0.849897			1.18952	0.841497		0.889578	0.922523		0.883512	0.911825
1.21478	0.940389
			0.919331	0.856084		0.917826	0.945722			1.14716	1.12555		0.919331	0.856443		0.917826	0.902929
1.20756	0.878673
			0.872994	0.848083		1.03885	0.979078			1.15399	1.39004		0.872994	0.804459		1.03885	1.03121
1.44293	1.51948
			1.10455	1.12523		1.3011	1.30973			0.961127	0.935062		1.10455	1.13133		1.3011	1.21534
0.835142	0.996991
			0.901811	0.857314		1.30237	1.23225			1.01071	1.23595		0.901811	1.23775		1.30237	1.656
0.937899	0.930875
			0.91937	0.963309		0.988168	1.11138			1.11295	1.24067		0.91937	0.983969		0.988168	0.93721
0.95713	1.00726
			0.968375	0.874688		1.03573	0.981191			1.11978	1.3793		0.968375	0.949715		1.03573	1.1118
0.731677	0.830326
			0.898541	0.759934		1.17949	1.15493			1.13946	1.324		0.898541	0.792162		1.17949	1.32779
0.822671	0.976522
			1.09896	1.12716		1.00071	0.971813			0.861881	0.761328		1.09896	1.10146		1.00071	1.17335
0.710597	0.859567
			0.91937	0.963309		0.940457	0.96232			1.00769	1.076		0.91937	0.983969		0.940457	0.947433
0.904679	1.11745
			0.963409	0.871489		0.865456	0.878257			1.00857	1.15465		0.963409	0.937094		0.865456	0.681024
0.762532	0.814247
			0.957113	0.876526		1.04822	1.05173			0.91729	0.800004		0.957113	0.893054		1.04822	1.14393
0.832157	0.947073
			0.900235	0.859994		0.921932	1.01526			0.917081	0.774722		0.900235	1.2014		0.921932	0.850812
1.06395	1.46418
			0.879473	0.893356		1.10023	1.35268			0.912203	0.707165		0.879473	0.757746		1.10023	1.11206
