# Supplementary material for: Trisomy 21 induces pericentrosomal crowding delaying primary ciliogenesis and mouse cerebellar development
Source: eLife. 2023 Jan 19;12:e78202. doi: 10.7554/eLife.78202 (PMC9851619; doi:10.7554/eLife.78202)
Supplement: Figure 4—source data 1. [file elife-78202-fig4-data1.xlsx]

## Sheet: Figure 4-source data 4B
REP1	D21 control	D21 siPCNT	T21 control	T21 siPCNT	Q21 control	Q21 siPCNT
capped	19	38	44	23	59	25
uncapped	26	45	27	47	9	38
total	45	83	71	70	68	63
capping freq	0.422222	0.457831	0.619718	0.328571	0.867647	0.396825
uncapping freq	0.577778	0.542169	0.380282	0.671429	0.132353	0.603175
REP2	D21 control	D21 siPCNT	T21 control	T21 siPCNT	Q21 control	Q21 siPCNT
capped	14	27	35	21	54	26
uncapped	13	31	24	33	5	21
total	27	58	59	54	59	47
capping freq	0.518519	0.465517	0.59322	0.388889	0.915254	0.553191
uncapping freq	0.481481	0.534483	0.40678	0.611111	0.0847458	0.446809
REP3	D21 control	D21 siPCNT	T21 control	T21 siPCNT	Q21 control	Q21 siPCNT
capped	22	19	34	25	41	25
uncapped	28	30	23	30	5	23
total	50	49	57	55	46	48
capping freq	0.44	0.387755	0.596491	0.454545	0.891304	0.520833
uncapping freq	0.56	0.612245	0.403509	0.545455	0.108696	0.479167

## Sheet: Fig 4 supp-source data 4B
	D21		T21		Q21
Both capped	4	44.4444	6	60	11	100
Uncapped, unciliated	1	11.1111	2	20	0	0
Uncapped, ciliated	4	44.4444	2	20	0	0
Total # of cells	9		10		11
		55.5556	4	40	0	0
Second N	D21						T21						Q21
Both capped	3	1	2	2	2	14.5455	10	6	4	6	6.5	37.1429	7	7	6	9	7.25	51.7857
Uncapped, unciliated	6	5	6	7	6	43.6364	5	9	8	10	8	45.7143	2	3	3	5	3.25	23.2143
Uncapped, ciliated	6	7	7	3	5.75	41.8182	3	2	2	3	2.5	14.2857	3	4	3	4	3.5	25
Total # of cells	15	13	15	12	13.75		18	17	16	19	17.5		12	14	12	18	14
Third N	D21						T21						Q21
Both capped	3	4	3	2	3	19.6721	7	4	4	9	6	42.1053	10	13	11	12	11.5	77.9661
Uncapped, unciliated	5	9	2	5	5.25	34.4262	4	6	7	1	4.5	31.5789	3	2	1	3	2.25	15.2542
Uncapped, ciliated	5	8	9	5	6.75	44.2623	3	3	3	6	3.75	26.3158	0	2	2	0	1	6.77966
Total # of cells	13	21	15	12	15.25		14	13	14	16	14.25		13	17	14	15	14.75
Averages
Both capped	44.4444	14.5455	19.6721	26.2207		60	37.1429	42.1053	46.416		100	51.7857	77.9661	76.5839
Uncapped, unciliated	11.1111	43.6364	34.4262	29.7246		20	45.7143	31.5789	32.4311		0	23.2143	15.2542	12.8228
Uncapped, ciliated	44.4444	41.8182	44.2623	43.5083		20	14.2857	26.3158	20.2005		0	25	6.77966	10.5932

## Sheet: Fig 4 supp-source data 4C
CEP97	D21		T21		Q21
Both capped	1	4.16667	23	85.1852	21	91.3043
Uncapped, unciliated	11	45.8333	2	7.40741	2	8.69565
Uncapped, ciliated	12	50	2	7.40741	0	0
Total # of cells	24		27		23
Second N
CEP97	D21		T21		Q21
Both capped	4	20	9	47.3684	18	85.7143
Uncapped, unciliated	5	25	4	21.0526	2	9.52381
Uncapped, ciliated	11	55	6	31.5789	1	4.7619
Total # of cells	20		19		21
Third N
CEP97	D21		T21		Q21
Both capped	5	19.2308	12	46.1538	15	83.3333
Uncapped, unciliated	5	19.2308	8	30.7692	2	11.1111
Uncapped, ciliated	16	61.5385	6	23.0769	1	5.55556
Total # of cells	26		26		18
	D21				T21				Q21
Averages	4.16667	20	19.2308	14.4658	85.1852	47.3684	46.1538	59.5692	91.3043	85.7143	83.3333	86.784
Both capped	45.8333	25	19.2308	30.0214	7.40741	21.0526	30.7692	19.7431	8.69565	9.52381	11.1111	9.77686
Uncapped, unciliated	50	55	61.5385	55.5128	7.40741	31.5789	23.0769	20.6878	0	4.7619	5.55556	3.43915
Uncapped, ciliated				100				100

## Sheet: Fig 4 supp-source data 4D
REP1	D21	D21 si	T21	T21 si	Q21	Q21 si
	0.860077	1.01079	0.898581	0.626937	1.13492	0.847723
	0.888813	0.850565	1.56298	0.971228	2.42808	0.982116
	1.14603	1.01622	1.6233	0.989139	1.13511	1.12104
	1.27066	0.717201	1.44216	0.551248	1.08109	1.04141
	1.21015	0.773322	1.00936	1.07505	0.995409	1.00537
	1.12087	0.778486	1.0285	1.21909	1.08816	0.659682
	0.943499	0.639647	1.38231	0.988052	1.52379	0.79881
	0.826002	0.918533	1.45274	0.861258	1.17835	0.828767
	0.889489	0.928492	1.14331	0.658603	1.15634	0.896597
	1.1735	0.994463	1.15542	0.967646	0.835254	0.708085
	1.01067	0.986257	0.998972	0.857923	0.91183	0.890686
	1.1072	1.01133	1.18233	1.16426	1.49096	0.83699
	0.827027	1.10572	1.73383	1.00863	1.47029	1.10736
	1.15126	0.816226	1.4674	0.770405	1.2232	0.693339
	1.02268	0.691291	1.3869	0.968064	1.17608	0.856778
	1.1386	0.77464	1.46895	1.05916	1.11167	0.975597
	1.02874	1.19357	1.31168	1.3483	1.06517	0.760282
	0.930737	0.889991	1.10747	1.29935	1.37315	0.856081
	1.01167	0.818672	1.33356	0.889416	1.20571	0.638503
	0.923868	0.733582	1.57055	0.821896	1.11369	0.866404
	0.988571	0.974234	1.19809	0.948331	1.09197	0.896234
	1.03756	0.433354	1.22687	0.962573	1.32496	0.805466
	1.06813	0.743393	1.36123	0.996392	1.30877	0.967441
	0.854841	1.02752	1.23172	1.26868	2.5293	0.642343
	0.925804	0.707816	1.04156	1.3757	1.03391	0.783264
	0.73448	0.642811	1.34318	0.944042	2.33925	0.98075
	0.728708	1.0489	1.31712	1.01316	0.976666	0.824995
	1.17325	1.10291	1.20918	1.00033	2.47472	0.905889
	0.663919	0.955944	0.943685	1.02204	1.32205	0.814728
	0.798606	1.06944	0.965516	0.988127	1.41736	1.01286
	1.20031	1.03409	1.0999	0.621701	1.44522	0.862359
	1.2961	0.930827	1.09028	0.723372	1.30706	0.734965
	0.926733	1.10727	1.39773	0.861554	1.3041	0.950185
	1.1247	1.04074	1.13973	1.032	1.40088	1.30692
	1.1725	0.891494	1.43189	0.973646	1.22927	1.24297
	1.18926	1.0022	1.40047	1.01071	2.39858	1.01114
	0.899908	0.733704	1.17689	0.970981	1.28143	0.950306
	1.39059	0.46714	1.20591	0.73112	1.07911	0.818825
	1.3351	0.998074	1.26281	0.844125	0.944605	0.901192
	1.1048	0.877711	1.3011	1.14549	1.10834	1.01993
	0.668272	1.20282	1.0689	1.1115	1.43922	0.808598
	1.04447	1.16411	0.901378	1.0145	1.03642	0.741072
	0.873421	1.02489	1.40349	1.04393	1.00806	0.763492
	0.857355	0.919579	1.1308	0.838613	1.32728	0.624063
	1.09166	0.754611	1.12502	0.727903	2.31783	0.802171
	1.08895	0.975015	1.28402	1.05071		0.954931
	0.904088	1.01226	1.15765	0.972193		0.934605
	0.682572	0.836169	1.68659	0.828723		0.972742
	0.778136	0.869293	1.18955	0.933079		1.08477
	0.915658	1.052	1.32926	1.05737		1.11455
		0.945931	1.48961	0.725292
		0.946364	1.39532	0.807455
		1.1083	0.960573	0.89692
		1.07024	0.972772	0.828924
		0.83483	1.11172
			1.24681
			1.25322
			1.17674
			1.10996
REP2	2.19948	0.744231	1.5779	1.32191	1.67364	1.01677
	1.02584	0.757972	1.42982	1.37346	1.65477	1.08059
	0.69917	0.764319	1.34315	0.811132	1.82536	1.31986
	1.27821	0.724847	1.95406	1.26458	1.34396	1.31803
	0.801991	0.697236	1.91754	1.25977	1.40168	1.5259
	0.807852	0.679719	1.75504	1.09321	1.26051	1.11413
	0.812278	0.74227	1.71654	1.46495	1.47821	1.15298
	1.2708	0.763468	1.66903	1.37529	1.71453	1.1365
	0.797373	0.731684	1.59807	1.58772	1.69258	1.16858
	1.69811	0.698871	1.60718	1.33563	1.39831	1.27376
	0.952087	0.713482	1.74166	1.1516	1.37612	1.30457
	0.723096	0.661222	1.76822	1.19793	1.65333	1.43564
	1.45448	0.684613	1.3534	1.49986	1.68751	1.40792
	1.2628	0.71112	1.08451	1.35136	1.23855	1.4849
	1.34112	0.73533	1.72557	1.01153	1.61488	1.17003
	0.849552	0.794721	1.17031	1.63679	1.41331	1.40496
	0.876932	0.952805	1.63133	1.27213	1.06985	1.19151
	0.798621	0.777953	1.13059	1.27906	2.00655	1.23693
	0.814591	0.770015	1.88596	1.22494	1.38755	1.10025
	0.817354	1.64425	1.36527	1.19865	2.65866	1.38452
	0.822792	0.667502	1.60228	1.2104	1.99419	1.329
	1.28587	0.700895	1.42643	1.53649	2.48345	1.04019
	0.678418	0.736182	2.12993	1.33928	2.45466	0.99714
	0.734221	0.806711	1.52925	1.04743	2.85046	1.11827
	0.712568	0.742096	2.13158	1.40913	1.99	1.28693
	0.726782	0.731404	1.72652	1.72663	1.37185	1.11869
	0.757598	0.72101	1.82716	1.00271	1.28386	1.10821
		0.67877	1.89533	1.67658	1.68071	1.2054
		0.686744	1.58475	1.40661	1.41932	1.17381
		0.866355	1.57639	1.04861	1.42481	1.09764
			1.31216	1.21657	1.43023	1.08889
			1.82091	1.18707	1.40511	1.1536
			1.63047	1.3886	1.44701	1.29295
			1.90939	2.03905	1.51781	1.42103
			1.70366	1.38861	1.54073	1.11733
			1.52821	1.36388	1.56615	1.32444
			1.44074	1.56933	1.72985	1.28186
			1.64389	1.44848	1.55789	0.910654
			1.57146		1.30022	1.21967
			1.45818		1.32986	1.15913
			1.46835		1.28955	1.20614
			1.94248		1.60294	1.39928
			1.80767		1.3101	1.2109
			1.74116		1.42102
					1.29174
					1.40021
					1.27995
					1.32859
					1.93733
					1.96643
					1.04546
REP3	1.24694	0.666895	1.16111	0.642493	1.85991	0.814477
	1.3715	0.919384	1.07242	0.708976	1.74921	0.967183
	1.10132	0.877414	2.48459	0.752642	1.70163	0.859188
	0.92997	0.879838	1.18625	0.805182	1.74248	0.887499
	1.20356	1.21636	0.906667	0.812462	1.71133	0.70685
	1.21672	0.512398	0.994856	0.781682	1.92957	0.909497
	0.94677	0.508654	1.07943	0.793091	1.72342	0.768167
	0.763559	0.610065	0.998746	0.770875	1.7846	0.786195
	1.03638	0.752045	1.86705	0.678708	1.92851	1.07245
	1.07445	0.77444	1.79734	0.609638	1.6478	0.833711
	1.22354	0.621509	1.54092	0.784814	1.61164	0.783722
	1.21392	0.627732	1.65219	0.726843	1.64655	1.06461
	0.677283	0.812695	1.19567	0.962667	1.81044	1.31998
	0.97787	0.806788	1.09464	0.856214	1.7745	1.24
	1.38803	0.743337	0.836632	0.565708	1.78224	1.23718
	0.795503	0.908058	2.74686	0.602213	1.80824	0.936097
	0.992046	0.558294	2.26336	0.832474	1.8299	1.11947
	0.828127	0.515131	0.886228	0.518593	1.66658	1.15408
	0.976174	0.640735	1.03154	0.670479	1.75585	1.22272
	0.989696	0.918126	0.98158	0.795047	1.82632	0.997233
	1.13078	0.858775	1.07981	0.655189	1.70737	0.744397
	1.0435	0.711775	1.24674	0.650891	1.84244	0.772508
	0.984291	0.591362	1.2104	0.866016	1.86715	0.68956
	0.798166	0.670757	1.09755	0.735161	1.90353	0.411852
	0.891345	0.51787	1.28174	0.62041	1.96469	0.526269
	0.889406	0.622944	0.826765	0.714129	1.82933	0.574917
	0.997416	0.634563	1.18416	0.742639	1.91821	0.726071
	0.775249	0.81931	0.942614	0.694094	1.80021	0.736886
	0.715998	0.865192	0.995003	0.724793	1.72785	0.555651
	0.853547	0.786856	1.00613	0.830147	1.86898	0.574811
	0.757458	0.804471		0.879399	1.663	0.559352
	1.03262	0.924652		0.655714	1.74268	0.494889
	0.856066	0.805468		0.937067	1.79491	0.554447
	1.04612	0.539339		0.805667		0.63822
	1.23096	0.645639		0.727261		0.636738
	0.949082	0.923557		0.780797		0.584791
	1.05856	0.781046				0.536052
	0.917075	0.863425
	1.43519	0.752738
	0.901203	0.708475
	1.14697
	0.728079
	0.910451
	1.12102
	0.876063

## Sheet: Fig 4 supp-source data 4F
	D21						T21						Q21
	RAB8	Total # cells	%RAB8				RAB8	Total # cells	%RAB8				RAB8	Total # cells	%RAB8
2h	1	17	5.88235				1	17	5.88235				0	12	0
4h	4	15	26.6667				2	17	11.7647				0	11	0
8h	7	17	41.1765				4	19	21.0526				0	16	0
24h	10	18	55.5556				7	19	36.8421				0	14	0
48h	11	16	68.75				10	16	62.5				3	13	23.0769
Second N
2h	0	28	0				3	32	9.375				0	30	0
4h	4	27	14.8148				4	28	14.2857				0	30	0
8h	13	33	39.3939				3	35	8.57143				0	22	0
24h	18	44	40.9091				2	34	5.88235				0	31	0
48h	18	25	72				10	27	37.037				7	27	25.9259
Third N
2h	4	30	13.3333				1	28	3.57143				0	27	0
4h	1	18	5.55556				1	24	4.16667				0	21	0
8h	5	23	21.7391				3	34	8.82353				0	19	0
24h	7	19	36.8421				7	34	20.5882				2	25	8
48h	24	30	80				11	27	40.7407				6	23	26.087

## Sheet: Fig 4 supp-source data 4H
D21	T21	Q21
0.831487	1.60402	0.64535
0.905653	2.02936	0.402355
0.824393	1.4964	0.475313
1.71859	2.12694	0.341742
0.168971	0.542472	0.976417
0.85933	0.695308	0.70945
0.698791	0.825559	1.08143
1.20787	1.20909	1.05629
0.655167	1.55785	0.790762
0.67989	0.856352	0.051451
1.15865	1.70984	0.233205
0.680964	1.65558	0.364643
0.49407	0.814615	0.678693
0.871789	1.49203	1.43229
0.046217	0.657494	0.455432
0.635851	0.738162	0.493906
0.733376	2.88867	0.478084
0.69357	1.9504	0.243547
1.01223	0.692905	0.184216
1.57879	1.70718	0.784617
1.27442	1.23916	0.4071
0.557402	1.30457	0.774557
1.19494	0.785234	0.594401
0.633332	1.11224	0.446509
0.732297	1.29801	0.630265
0.69357	0.89993	0.798625
1.01223	0.390923	0.047579
1.84445	1.14568	0.590406
0.77191	0.841352	0.748033
1.63044	0.674728	0.982939
1.51051		0.635008
1.76897	0.372445	0.802983
2.91988	0.331392	0.447873
	0.263651
1.30445	0.177862	1.33297
0.801083	0.89966	1.03273
0.996281	0.234933	0.783291
1.3469	0.384848	0.706357
0.681721	0.358012	1.11131
0.645445	0.44533	0.820546
1.37346	0.240716	0.603232
1.56378	0.493179	0.727226
1.37424	0.275511	0.84627
0.64885	1.12937	0.758183
0.816472	2.20051	1.22914
1.11129	0.631026	0.654153
0.784074	2.15377	0.866372
0.679907	0.689761	0.594689
0.816407	1.11002	2.63275
1.00068	0.365228	4.22518
0.577746	0.860891	5.00132
0.942134		4.97865
1.97258	3.1673	2.77294
0.562493	1.58052	5.68191
	1.25183
1.0007	0.802922	0.709593
1.2714	0.864919	0.826903
2.25711	1.7583	0.753578
0.080095	1.44095	0.476038
0.950464	1.15393	1.0165
0.784104	0.467243	1.68875
1.60992	1.12437	0.794355
2.01696	-0.18769	0.850603
1.47955	0.448641	-0.0579
0.328522	1.25056	1.00951
1.15955	1.00019	1.34558
1.37245	0.405472	0.411659
0.682928	1.96251	0.198659
1.49624	0.510959	0.348223
0.325665	-0.12446	0.704662
0.53176	0.321722	0.701001
0.488743	0.006906	1.95523
1.65487	1.75387	1.34312
0.602734	0.910657	2.97367
0.907942	1.05743	-0.30545
0.813822	2.03058	1.13413
0.132074	1.60251	1.04996
0.382978	1.04933	1.2186
0.735409	1.9794	0.48552
1.05273	1.32655	0.378586
1.36223		0.926455
1.60796		0.501157
0.841603		1.80758
1.50835		1.19424
0.561153		0.514051
