# Supplementary material for: Trisomy 21 induces pericentrosomal crowding delaying primary ciliogenesis and mouse cerebellar development
Source: eLife. 2023 Jan 19;12:e78202. doi: 10.7554/eLife.78202 (PMC9851619; doi:10.7554/eLife.78202)
Supplement: Figure 5—source data 1. [file elife-78202-fig5-data1.xlsx]

## Sheet: Cep290 TZ
D21	T21
0.690001	1.12677
0.599226	0.229369
1.31451	0.988154
0.470315	0.177642
1.97309	0.320238
1.13258	1.0155
0.770556	0.753331
0.59384	0.789183
0.505167	0.720631
1.17729	0.64785
1.30803	0.783779
1.37437	0.216847
0.463798	0.274872
0.611629	0.510014
0.95142	0.479197
0.695849	1.03281
1.11222	0.604248
1.28277	0.620442
0.606512	0.622869
1.59048	0.821001
1.62563	1.0376
0.843731	0.774153
0.912558	0.588943
0.601209	0.630975
1.12891	0.362958
1.63716	0.543514
0.987978	0.285949
0.885576	0.569247
0.823566	0.459776
1.17403	0.433837
1.51851	0.412183
0.795876	0.302456
1.1226	0.317499
1.06525	0.710774
0.830671	0.810906
1.54396	1.00809
1.04923	0.184728
1.55315	0.469152
0.74727	0.751761
0.420371	0.375843
1.00315	0.286881
1.09365	0.423473
0.572687	0.403908
0.859643	0.372759
1.12679	0.788014
1.02122
0.871508
1.05545
0.823878
1.35826
0.72287
1.62819	1.45447
3.02332	0.86373
1.02509	1.12441
1.95177	1.00589
0.578278	1.40078
0.301075	0.534471
1.78894	1.23042
0.972766	0.518559
1.67879	0.435595
0.720991	0.5059
2.08182	0.666053
0.956131	0.36361
0.640992	0.41885
0.362358	0.470015
1.40058	0.980676
0.177249	0.578358
0.885293	1.15784
1.00548	0.404079
1.27428	0.160287
0.663414	0.288581
0.729183	1.10327
0.278309	1.32129
0.874634	0.380577
0.506194	0.811539
0.378209	0.339605
0.550137	0.777532
0.358296	3.05152
0.898498	0.322355
0.419377	0.727177
0.503151	0.927916
0.957683	1.73275
1.19328	0.790523
1.04341	1.09888
0.746402	1.03004
0.615606	0.858213
0.460258	0.977252
0.883513	0.820186
0.494658	1.5206
1.87344	0.695808
1.54225	0.376539
0.395157	0.765136
3.44203	1.0592
1.06901	0.285157
1.3065	0.628627
0.6318	0.570399
0.92135	0.9099
1.3837	1.86932
0.762792	0.88509
0.538294	0.787602
0.734546	0.374747
0.286979	0.228273
0.948614	0.776464
2.7487	0.421568
0.753244	0.665003
0.733368	0.847241
1.38293	0.152292
0.747403	0.760988
0.557083	0.572731
1.23319	0.302449
	0.509778
	0.487006
0.740338	1.25332
0.630571	0.4934
0.554827	1.24563
0.865308	0.641707
1.08602	1.40207
0.280499	0.863499
0.985749	1.79911
1.86114	0.751012
1.33567	0.891659
0.6512	0.83353
0.772706	0.852953
0.602565
1.3548
1.1169
0.960912
0.660232
1.03483
1.21582
1.18059
0.461186
1.39468
0.429421
2.0492
0.35564
0.988007
0.918293
1.56363
1.12052
0.845269
0.929441
0.860176
1.31188
0.788358
2.09362

## Sheet: Cep290 pericentrosomal
					centrosomal			pericentrosomal
					D21	T21		D21	T21
5.58821	6.36465	6.62786	8.49793	6.37013	0.877252	1.04046	6.18837	1.02849	1.37321
6.0255	5.91872	7.11023	11.4752		0.945899	1.11618		0.956426	1.85432
5.74593	5.50478	6.1724	5.33001		0.902011	0.96896		0.889537	0.861294
5.96731	4.8833	7.67913	10.3936		0.936764	1.20549		0.789109	1.67954
8.48424	9.41867	7.86091	10.8912		1.33188	1.23403		1.522	1.75995
5.65519	5.39424	6.34048	8.59496		0.887768	0.995346		0.871674	1.38889
5.71936	4.48958	7.09605	7.24107		0.89784	1.11396		0.725487	1.17011
7.33062	7.0988	6.80257	10.4288		1.15078	1.06789		1.14712	1.68523
6.46241	8.10917	8.07749	6.54739		1.01449	1.26803		1.31039	1.05801
7.19303	8.10536	7.34885	14.2659		1.12918	1.15364		1.30977	2.30528
4.86441	3.89541	6.20246	9.46767		0.763627	0.973679		0.629473	1.52991
6.93003	5.17763	7.04639	5.92437		1.08789	1.10616		0.836671	0.95734
6.10446	5.29323	6.06192	5.72947		0.958294	0.951616		0.855351	0.925845
6.03599	4.53392	7.47459	7.36227		0.947545	1.17338		0.732652	1.18969
6.03111	6.88703	6.50335	8.89597		0.946779	1.02091		1.1129	1.43753
5.44423	4.27238	4.1583	3.50683		0.854649	0.652781		0.690389	0.56668
6.25488	4.79479	6.97233	9.61451		0.981907	1.09454		0.774806	1.55364
7.58063	9.78804	6.92551	6.4207		1.19003	1.08719		1.58168	1.03754
5.47274	6.21436	6.92551	6.4207		0.859125	1.08719		1.0042	1.03754
6.71092	6.1303	7.21985	8.64957		1.0535	1.13339		0.990616	1.39771
8.6434	8.24948	5.99	7.68937		1.35686	0.940326		1.33306	1.24255
6.6907	5.32266	7.07263	7.36232		1.05032	1.11028		0.860106	1.1897
6.23534	8.40808	7.27046	6.41598		0.978841	1.14134		1.35869	1.03678
7.47792	6.94263	5.45471	4.94796		1.1739	0.856295		1.12188	0.799557
7.09148	8.1904	7.93548	7.27067		1.11324	1.24573		1.32352	1.17489
7.66375	5.78228	6.08957	5.21993		1.20308	0.955957		0.934379	0.843506
5.99291	5.69843	7.78988	9.28137		0.940783	1.22288		0.920828	1.49981
6.32094	9.99483	5.8599	8.38359		0.992278	0.919902		1.6151	1.35473
5.84505	5.20753	5.7764	6.05397		0.917571	0.906795		0.841502	0.978281
6.76913	6.34998	6.15835	6.99394		1.06264	0.966754		1.02612	1.13018
7.36071	7.07432	5.47431	3.71435		1.1555	0.859372		1.14316	0.600214
6.28081	6.61697	5.86687	5.96878		0.985978	0.920998		1.06926	0.964516
6.73234	6.4137	5.86687	5.96878		1.05686	0.920998		1.03641	0.964516
5.80961	7.04636	6.55018	6.91128		0.912008	1.02826		1.13865	1.11682
3.19229	2.92138	6.85457	7.66877		0.501134	1.07605		0.472075	1.23922
7.17271	6.78859	6.1818	7.43944		1.12599	0.970435		1.09699	1.20216
7.32726	7.83194	5.48369	5.68229		1.15025	0.860844		1.26559	0.918221
6.27531	6.53645	7.83828	9.47673		0.985114	1.23047		1.05625	1.53138
6.69631	3.10279	6.74329	5.36256		1.0512	1.05858		0.50139	0.866554
5.36616	3.75219	7.97541	9.91117		0.842394	1.252		0.60633	1.60158
6.35635	5.17966	7.94738	10.3554		0.997837	1.2476		0.836998	1.67337
5.73134	4.63911	6.98617	7.70227		0.899721	1.09671		0.749649	1.24464
5.93216	5.51077	6.90003	7.5998		0.931247	1.08319		0.890504	1.22808
5.72056	6.45343	6.4064	5.05663		0.89803	1.00569		1.04283	0.817118

## Sheet: RPGRIP1L TZ
D21	T21
0.946981	0.270373
0.674042	0.633778
0.921963	0.841671
0.917335	0.259566
0.796572	1.62441
1.36538	0.629406
1.1717	1.19605
0.736442	0.120626
0.954648	1.69186
1.15372	0.813467
1.10836	1.05948
1.42351	1.22459
0.610616	0.600955
0.498231	1.25571
1.18063	0.388462
0.68396	0.984985
0.806914	1.12248
0.647948	0.48472
0.921894	0.770943
1.08629	1.54037
1.01899	1.06794
0.573055	0.733264
0.672246	0.968702
0.698713	0.875708
0.681878	1.04657
0.762318	1.14195
0.85306	0.358322
2.18492	0.725961
0.784581	0.707635
0.470056	0.319094
1.53206	0.372672
0.845975	0.58552
1.33503	0.374132
0.709786	0.627422
1.80636	0.752775
1.05458	0.415542
0.809934	0.529348
0.808246	1.01515
0.768989	1.06581
0.732445	0.36905
1.9197	0.931398
0.910851	0.998949
0.52914	0.659337
1.5166	1.65696
1.05284	0.82294
0.929563	0.388975
1.11296	0.0142504
1.29893	0.543834
0.916536	0.653308
1.45822	0.633788
0.611672	0.06544
0.775927	0.164058
1.3236	0.0131649
0.751403	0.925912
1.55877	0.745452
0.847978	0.00626626
1.00887	0.714672
0.844109	0.695349
1.29642	0.237106
1.14907	0.650663
1.18416	0.527077
0.9914	0.585569
1.53579	0.540588
0.765141	1.00957
	0.273698
	0.880752
	0.701467
	0.977278
	1.02986
	0.493228
	0.645137
0.271135	0.819374
0.683652	1.19452
0.823772	0.28723
1.30916	0.614836
1.02349	0.550617
0.810948	0.399055
1.30378	1.314
0.354346	0.511358
0.800821	1.20077
0.791212	0.824157
0.649497	0.635728
1.2241	0.517311
1.43561	0.866515
1.59098	0.905853
0.960264	0.871299
0.826033	0.345056
1.12339	0.587086
0.93763	0.513511
1.03563	1.13502
1.19685	0.913123
1.49485	1.69168
1.56123	0.937499
0.684092	0.713675
1.48535	0.975734
0.907967	1.47642
1.03049	0.958722
0.888443	0.635396
0.260676	0.617281
0.836638	0.773164
0.995497	1.84451
0.851151	1.85421
0.915994	2.00199
0.700518	1.31912
1.27481	0.738489
1.04225	0.969606
0.651092	1.56958
0.481136	0.779796
0.451312	0.800435
0.783331	0.659625
0.766691	1.5725
0.756684	0.701928
0.887659	0.57478
0.765004	0.670269
1.38114	0.566486
0.545355	0.522973
0.579869	0.517803
1.74013	0.550751
1.70003	0.902676
0.748244	0.560731
1.64719	1.2553
1.10082	0.404558
1.09224	1.02378
1.10797	0.790055
1.55855	0.819865
1.32713	0.869824
1.28899	0.449292
0.768286	0.502387
1.1759	1.0506
1.44765	1.17513
0.879047	0.576573
0.895594	1.33344
1.25698	0.747739
1.38824	0.856613
0.696971	1.19157
1.04853	0.574115
	0.928727
	1.18276
	0.764166
0.396262	1.20286
0.497726	1.85847
0.575989	0.786965
0.57398	1.19279
0.849905	0.843293
1.18925	1.34542
0.279851	0.772205
1.39352	1.6134
0.725453	1.69129
0.779487	1.71868
1.54537	0.952895
1.11692	1.6132
0.94207	1.58197
0.712041	1.42695
0.624471	0.884779
0.947923	0.624667
1.29953	0.468206
0.875677	0.689526
0.994284	0.910167
1.2979	0.678023
0.793577	0.639125
1.26455	1.48568
0.681281	0.975124
0.918021	0.660113
1.14154	0.254463
1.33948	1.35174
0.941205	0.85384
1.76553	0.406989
1.5172	1.26236
1.47812	0.508256
0.984986	1.46978
0.444639	0.458149
1.29301	1.36247
1.17421	0.910257
0.44321	1.18944
1.48578	0.571303
1.48098	1.23045
1.05608	0.875587
1.43318	1.19615
0.5438	1.20162
0.727461	1.64089
0.800467	0.86993
1.06403	1.60161
0.761478	1.13781
0.977132	0.79654
1.74877	0.830549
1.12266	1.03615

## Sheet: NPHP4 TZ
D21	T21
0.991869	2.0659
1.69027	1.12125
0.807534	1.34582
0.702035	1.20217
1.60832	0.249076
1.08067	0.921401
0.540373	2.37712
1.20327	1.18456
0.687253	0.448523
0.290785	0.517559
0.855188	0.97239
0.285871	1.45466
0.412791	0.705301
0.827307	1.36912
0.302084	1.1528
0.77078	1.25554
1.13959	0.227984
0.648114	0.651709
0.670341	0.421705
0.776834	1.05085
1.56115	0.687291
1.55367	1.1222
1.55825	0.697305
0.740002	0.819349
1.48059	0.0849956
0.810985	0.382603
0.404649	0.348268
0.320828	1.18486
2.55239	1.86206
0.866559	0.0734025
0.952323	0.708051
0.754161	0.361912
0.381353	0.791543
0.850312	1.88359
0.866962	0.951886
1.60689	0.624197
1.85127	0.546978
0.525958	1.34435
1.41783	1.32656
1.37458	0.670084
1.10177	0.573205
0.277544	0.924774
0.865387	0.693855
1.99529	0.154472
0.839744	0.261954
2.61094	0.494633
0.741471	0.509892
1.01784	0.94073
0.828007	0.34669
0.596	0.69457
0.66357	0.480328
0.968953	0.835221
0.807935	0.747314
0.74962	0.0161737
1.78848	1.17487
1.19661	0.429861
0.547898	0.945831
1.2156	0.740365
1.23411	0.132325
1.5335	0.626071
0.715835	1.18508
0.701489	0.862087
1.28039	0.346117
	1.08142
	0.681152
	0.459932
2.67846	1.63497
0.73392	1.46653
0.588468	0.922459
0.416771	0.229929
0.335558	1.44656
0.346396	1.25345
0.73405	0.488714
0.514828	0.485711
2.62793	0.971553
0.415205	2.20803
0.265183	1.76828
1.30254	0.0245467
0.441318	0.0597999
1.35451	1.76841
1.09102	0.0826492
0.525534	0.352532
0.64657	1.36391
1.85876	1.28413
0.845816	1.01738
0.478138	0.216089
1.29484	0.494981
1.66565	-0.0168432
1.22903
0.470435
1.3408
0.605311
0.988396
1.9277
0.86279
1.10173
1.02822
1.28413

## Sheet: TMEM67 TZ
D21	T21
0.808361	1.12179
0.982211	0.845845
0.999864	1.00561
0.832713	0.844455
1.00769	0.648949
1.5495	0.875849
0.847061	0.752706
0.904028	0.622948
1.06857
1.56267	0.865289
0.64182	0.391803
0.799949	0.956193
0.59893	0.711279
0.891071	1.39899
1.83381	0.458478
0.667271	0.770058
0.694161	0.695051
0.675054	0.962631
0.808839	0.507931
1.16964	1.12332
0.663275	1.00852
1.11431	0.539706
0.706611	0.481817
0.696281	0.817948
0.67939	0.933176
1.72669	0.818061
0.823506	0.965737
1.20709	0.90996
0.78195	0.645721
0.365141	0.664942
1.00785	0.388253
0.868394	0.526593
0.963635	1.05597
0.605605	0.349916
1.09176	0.95251
0.712614	0.817285
1.80059	0.730509
1.57879	0.542717
1.30654
1.40055
0.646488
1.30577
0.685942
0.964411
1.41344
0.956856
0.741833
1.08465
0.691841
1.01763
0.699832
2.34752
0.309776	1.36071
0.748107	1.05189
0.606071	1.33545
0.781617	1.23719
0.774658	0.384812
0.456427	0.750999
1.51411	0.66997
1.37184	0.995707
1.12041	0.929445
0.543557	0.776902
1.20143	0.434583
1.55136	0.621913
1.1065	0.679921
0.511653	0.391342
1.25913	0.639571
1.83148	0.73045
0.494743	0.749932
0.485431	1.00083
0.302069	0.829674
2.96945	0.988101
1.10413	0.973763
0.35184	0.964332
0.659162	1.05019
1.94504	0.714826
	0.900761
	0.367364
	1.31886
	0.571175
	1.19298
	1.34809
	0.718456

## Sheet: GM130
D21	T21	Q21
1.34502	2.53307	0.683138
0.457956	2.65653	1.05676
1.12482	2.84085	0.83331
1.62293	0.998901	1.07972
1.01514	1.20201	0.635114
2.99668	2.50906	0.917364
1.14341	1.52805	0.590744
2.56398	2.20378	0.440973
0.534608	1.14611	1.43065
0.959027	1.20581	0.223846
0.672812	0.983184	0.379035
1.02084	1.29222	0.366841
1.09856	2.95882	0.193982
0.889592	4.48087	0.338293
0.525641	1.33776	0.30001
0.913647	1.65656	0.591474
0.824501	0.877756	0.170838
0.72109	1.03989	0.321599
0.915629	1.1919	0.619716
0.671215	1.27584	0.760308
0.568685	3.51705	0.396317
1.19638	1.49375	0.157754
0.844705	1.71847	0.928998
0.621626	3.03837	0.637746
0.778309	3.24987	0.768697
1.35699	1.17521	0.590641
0.927927	0.4879	1.3321
0.565391	0.66816	1.39643
0.685437	0.35652	1.30592
0.665239	1.87809	0.696492
1.10653	3.10365	1.12532
0.665693	1.78063	1.01557
0.983953	1.72844	0.412093
2.24948	1.26551	0.958666
0.913361	1.39985	0.539053
0.908147	1.34034	0.477184
0.784233	1.16763	0.574918
3.08978	1.32005	0.68429
0.652676	1.84333	0.590956
0.957429	1.68595	0.485511
0.758545	1.60315	0.774116
2.44956	1.12963	0.499682
0.785569	0.703953	0.385122
0.893838	0.817988	0.949581
0.825504	0.959654	0.295573
2.4168	1.2736	0.421791
2.6441	0.613536	0.849273
1.22666	0.445137	0.27414
0.774579	0.638404	0.449682
0.570766	1.32075	0.367019
0.73319	0.455899	0.44725
0.94718	0.698741	0.733975
0.732349	0.973924	0.406839
1.09245	0.80826	0.473957
0.866925	0.495701	0.181345
0.739598	0.313044	0.323759
1.7269	0.649605	0.194195
2.12523	1.47848	0.382266
1.39354	0.676741	0.444065
0.458862	1.4098	0.398608
0.730488	1.71178	0.607225
0.809334	0.543436	0.233884
0.691796	0.887449	0.420504
0.935082	0.588286	0.354096
0.334819	0.81901	0.511283
0.621606	1.08252	0.309359
0.486802	1.16827	0.293437
0.716701	1.19862	0.341563
0.569091	1.02698	0.704687
0.622661	1.1328	0.665949
0.419216	0.565608	0.528507
0.66008	0.838918	0.26414
0.66484	0.335496	0.489463
0.730993	0.432204	0.200212
0.509499	0.463609	0.224808
0.651375	0.143504	0.389792
0.620008	1.66584	0.526862
0.427151	0.849191	0.153896
0.716634	0.316993	0.557508
0.570093	0.578783	0.543991
0.779189	0.850273	0.651629
0.975439	1.7397	0.807656
1.60106	1.20236	0.643348
0.668681	0.845058
0.961036	1.39702
0.937255	2.18296
0.779993	1.36685
0.843952
1.21963
1.73171
1.31257

## Sheet: Golgi Size
GM130_D21	GM130_T21	GM130_Q21	Golgin97_D21	Golgin97_T21	Golgin97_Q21
1.34099	2.20334	0.534595	1.37339	1.47991	1.36601
0.698029	2.34551	0.625486	1.7837	0.741901	0.998461
1.57056	1.7174	0.749018	1.12967	1.15726	0.489216
1.79956	0.830876	1.01937	1.44629	0.479894	0.888845
1.25301	0.688129	0.762124	0.754734	0.796124	1.09623
1.4214	1.4316	0.844566	0.644715	1.28749	0.765025
1.73343	0.920032	0.723674	0.625277	0.95356	0.603903
0.69454	2.26335	0.479533	1.20857	1.32384	0.589321
1.14901	1.1697	1.18835	1.04706	1.41519	0.798074
1.14056	0.680548	0.565181	1.0389	0.96989	0.710801
1.28273	0.592279	0.930516	0.694082	0.902834	0.552196
1.71244	1.05344	0.961385	1.04783	0.664341	0.721684
1.05433	1.23525	0.468162	1.68108	0.722263	0.712361
1.03044	2.45273	0.64472	0.987	0.801572	0.540923
1.10589	1.00889	0.645889	0.86591	0.448404	1.55514
0.956445	1.08988	0.997232	1.01479	0.432464	1.05056
0.950618	0.634236	0.473989	0.60545	0.619251	1.07991
1.23145	0.802044	1.00189	1.00624	0.696032	0.57669
0.734441	0.998401	1.16036	0.649181	0.37921	0.536457
0.57246	1.23176	1.14377	0.724213	0.416914	1.32791
0.695992	2.3726	0.600425	0.671927	0.335869	0.870575
0.641514	0.952372	0.380477	1.1943	0.543641	0.95558
0.940133	1.92599	0.632482	1.01296	0.469401	0.75971
0.436992	1.91317	0.630728	1.62286	0.661824	0.703406
0.970719	2.02154	0.618792	0.454418	0.425469	0.836577
0.597238	0.814848	0.917411	0.901386	0.326924	0.932564
0.614417	0.595183	1.05492	0.696322	0.380959	0.815325
0.622582	0.601594	1.13357	1.60621	1.30127	1.07032
0.862348	0.745228	0.795331	1.26016	1.62001	0.63752
0.798838	1.32176	1.01296	1.05439	0.881189	1.5127
0.386889	1.97943	0.603932	1.03669	1.18084	0.910601
1.08967	1.28958	1.05899	1.08804	0.779906	0.950628
1.80702	1.15934	0.835838	1.12451	0.685685	1.11495
0.883538	1.26474	1.38856	0.404121	0.818145	1.40291
0.929687	1.11342	0.842266	0.650633	1.00198	0.929721
0.63636	0.692057	0.648781	1.19322	1.11709	1.11709
0.487928	0.630593	0.782579	1.74787	0.811061	0.850378
0.944774	0.741099	1.09566	1.44542	0.895013	1.30869
0.900629	1.093	1.57694	0.850034	0.575187	1.4022
2.16136	0.934792	0.884199	0.714387	0.95487	1.4362
0.756621	0.860018	1.11674	1.25697	0.930432	0.830204
0.70981	1.09188	0.773485	0.910235	0.630803	0.865256
0.691395	1.37012	0.692719	0.944943	0.681444	1.05899
2.63354	0.842058	1.6091	1.10539	0.50577	1.5003
2.59493	1.91019	0.436447	0.934329	1.09831	1.00588
1.08746	1.12828	0.734444	0.742722	1.20562	1.18969
0.983834	0.866465	1.62685	0.533051	0.719683	0.850744
0.726447	0.601743	0.9865	0.876948	0.775642	1.69828
0.813434	1.11296	0.83406	1.47942	0.738114	0.69419
1.03265	1.97344	0.717788	1.09655	0.926534	0.946364
0.770385	0.883991	0.872232	0.751915	0.793707	0.861359
1.12451	0.753067	1.54476	1.14224	0.669041	0.824885
0.761291	1.51147	0.871116	1.32639	0.42042	0.833023
0.644357	1.05795	0.816969	0.639285	0.42042	1.55663
1.92195	0.593537	0.420471	0.890405	0.649922	0.709412
2.13319	0.913504	0.763049	1.07211	0.74733	0.962664
1.47331	0.846709	0.60974	1.25379	1.27683	1.25592
0.601969	1.2126	1.07037	0.624063	0.875526	0.590409
0.677197	0.834287	1.21925	0.510722	0.488049	0.763263
0.710471	1.80791	1.60688	1.22864	0.451232	0.726079
0.769931	1.90976	0.975837	0.924402	1.10753	1.02005
0.837615	0.503677	0.493921	1.09052	1.03774	1.32357
0.609078	0.903294	0.777475	0.607052	0.762185	0.888552
0.703155	0.758171	0.818085	0.915631	0.544719	0.995925
0.691168	1.46732	0.605751	1.04914	0.849323	0.772851
0.617945	1.31201	0.847143	0.811493	0.754047	0.852456
0.559809	1.3242	0.810976	0.450761	0.893591	0.467416
0.677197	0.952999	0.576673	1.67345	0.569157	0.753425
0.466186	0.667422	0.962981	1.5825	1.07211	0.70066
0.856464	1.14981	0.864008	1.47607	0.703039	1.15789
0.649008	0.540733	0.860472	1.16854	1.28887	1.4365
0.79345	0.700262	0.597526	0.826081	0.869111	0.728428
0.412701	0.567579	0.859792	1.48741	0.742088	1.15326
0.716238	0.816761	0.6723	0.846435	0.631015	0.838572
1.0961	0.648573	0.572684	0.692557	0.932286	1.7734
0.7919	0.672981	0.692284	0.94987	1.35019	0.632168
0.649461	1.85584	0.983834	1.34441	1.51817	0.860784
0.769496	0.975402	0.585332	1.07066	0.713151	1.06349
0.977406	0.437997	0.836272	1.87569	0.361436	1.15882
1.34328	0.444217	0.832283	0.876989	0.509533	0.898737
2.12786	0.534305	1.12873	1.14101	1.03295	1.36245
0.811865	1.34838	1.36082	0.752497	0.622687	1.28471
1.24099	1.05462	1.06816	0.427381	1.03641	0.935761
0.943678	0.99514	0.911204	1.0031	0.980184	0.729357
0.59021	1.09965	0.817863	1.08501	1.17248	1.63549
0.728451	1.34728	0.833042	0.673356	0.770305	1.06997
0.82784	0.939897	0.932216	0.53799	0.89989	1.14772
1.48617	1.09788	1.03722	0.505369	0.816825	0.670121
1.56561	0.981209	0.854036	1.06395	0.81335	1.13291
1.51046	0.915886	0.904218	1.14518	1.37796	1.39855
0.733868	1.04072	0.810878	1.15906	0.708523	1.03087
1.66724	1.04772	0.910052	0.554884	0.842047	1.24051
0.66037	1.51441	1.47706	0.495409	1.12226	1.60033
0.934539	0.866874	1.28457	0.622912	1.22662	1.42678
1.02205	0.822545	0.996388	1.07066	0.816361	1.13198
0.602032	1.43623	0.920549	0.881842	1.08501	0.795991
1.44789	0.861041	1.27639	1.20649	0.803166	0.504905
1.50391	1.16089	0.932216	0.889016	1.1491	1.24398
1.08272	1.2274	1.05471	0.343163	1.59986	1.10445
1.17255	1.24722	0.826038		1.14148
0.730375	1.74776	0.801532		1.1225
1.29623	1.29973			0.7275
1.34989	1.6964			0.552114
0.989384	1.09439			0.738613
1.01038	0.968371			1.23843
1.06872	1.07106			1.38836
1.10138				0.685158
0.606695
0.786372
0.701206
1.00337
0.805044
1.03838
0.789865
0.899536
1.40356
0.99754
0.746706
0.848202

## Sheet: Golgin97
D21	T21	Q21
1.06756	1.1177	1.14094
1.15049	2.03432	1.04201
1.27147	1.42023	0.689486
0.781526	0.756859	0.93945
0.702738	0.913915	1.11472
0.771506	0.622066	0.820917
0.886369	0.786477	0.921123
1.59937	1.22362	0.763504
1.35391	0.562411	1.09229
1.12876	0.755044	0.623302
0.630236	1.09955	0.519966
0.92739	0.754314	0.837068
0.849191	0.710898	0.689109
1.13232	0.596088	0.532083
1.47994	0.763212	1.1076
0.787691	0.641749	0.945457
0.95489	0.417707	0.678637
0.984258	1.66322	0.534101
0.776497	0.409588	0.488135
0.763887	0.562862	1.28821
1.39345	0.684955	0.974943
1.40186	0.242032	0.866302
1.64011	0.419753	0.835276
0.878949	0.324421	0.88264
1.15571	0.553706	0.758148
1.26497	0.441752	0.841869
1.27691	0.426724	1.00399
1.2323	0.370689	0.886955
0.909179	0.252002	0.294862
0.917812	0.401174	1.63919
0.868963	1.30788	0.7304
0.808469	1.03127	1.07721
0.549387	0.833851	1.0258
0.514335	0.832799	1.36966
1.08575	0.583527	0.801555
1.92862	0.556629	0.681729
1.3577	0.490407	1.16702
0.977273	0.868339	1.12478
1.14918	0.737813	0.971032
0.813042	0.579334	1.35369
1.26654	0.885223	0.483294
1.02945	0.260057	0.750551
0.790194	0.405521	0.800734
0.946523	0.442591	0.814216
0.777944	0.471205	0.610786
0.764727	0.721	0.953945
0.863463	0.628455	0.746845
1.26448	1.30946	1.43068
1.08317	1.35503	0.454513
0.953364	0.841107	1.16422
1.07307	0.595445	0.99085
1.55855	0.728062	0.756419
0.619374	0.850615	1.22942
0.782465	0.396501	1.90969
1.15115	0.588756	0.744917
1.26025	0.43359	1.05747
0.667351	0.443408	0.816959
0.382863	0.744944	0.814664
0.887588	0.988017	0.771204
0.680634	1.08171	0.676409
0.83231	0.777581	1.11695
0.240579	0.63267	1.46457
1.41481	0.403475	0.64431
1.16944	0.876185	0.812506
1.11424	0.681209	0.779185
1.77381	0.720198	0.857346
1.26571	0.514763	0.340296
0.938813	0.570752	0.736992
0.114396	0.876793	0.694439
0.541825	0.720563	1.38496
1.48032	0.407855	1.2549
0.600514	1.00294	0.899727
0.281282	0.556877	1.31285
0.118004	1.20251	1.24162
0.72411	1.13666	0.898785
0.712896	1.03055	1.3145
0.858212	0.596401	1.30573
1.63407	1.90675	1.13003
1.15019	1.55406	1.05842
1.2856	1.86482	1.36564
1.85008	1.40935	1.45997
1.11571	1.2553	1.08334
1.6488	1.20875	0.836622
0.713935	0.823936	1.38348
0.110533	0.547383	1.12254
0.444487	0.565373	1.02176
1.67138	0.960592	0.550651
1.71168	0.791153	0.93617
0.555148	1.14308	0.80662
	0.243289	0.902674
	0.412469	0.605511
	0.885937	1.12702
	0.274831	1.18421
	0.0511204	1.17759
	0.368636	0.694053
	0.477688	0.615586
	0.179584	1.1883
	0.174459	1.1219
	0.0762258	1.62867
	0.542255
	0.444436
	0.425004
	0.288301
	0.198605
	0.316614
	0.418357
	0.433679
	0.778189
	0.410647
	0.0903127

## Sheet: EEA1
D21	T21	Q21
0.972791	0.56702	0.582871
1.02721	1.27386	0.707216
0.641389	0.734545	0.587287
1.15287	0.73494	0.79984
0.617185	1.1634	0.422202
0.92545	0.807945	0.463631
0.976331	1.03252	0.411203
0.653836	1.29761	0.593818
1.39351	0.782969	0.469565
1.19908	0.87078	0.558084
1.16179	0.922611	0.634008
1.73497	1.32352	0.417827
1.065	0.818012	0.420162
0.697034	1.24146	0.475982
0.781557	0.593	0.324888
	1.19744

## Sheet: CD63
D21	T21	Q21
0.549008	0.286691	1.34334
1.24457	1.16094	1.04791
1.20642	1.0415	1.00263
0.790063	0.486133	1.16335
0.936172	0.686289	0.990632
1.17809	0.486766	0.725071
1.10807	0.599189	0.880925
0.98761	0.395618	1.05315
0.995553	0.768615	1.22377
0.943959	0.889463	0.787854
1.02144	0.93955	1.36927
1.03263	0.593461
1.00642	0.600663

[truncated: 2 more sheets: IN OUT, Cep290 centrosomal int]
