# Supplementary material for: Trisomy 21 induces pericentrosomal crowding delaying primary ciliogenesis and mouse cerebellar development
Source: eLife. 2023 Jan 19;12:e78202. doi: 10.7554/eLife.78202 (PMC9851619; doi:10.7554/eLife.78202)
Supplement: Figure 6—source data 1. [file elife-78202-fig6-data1.xlsx]

## Sheet: 6C
WT	Dp10	WT	Dp16	WT	Dp17
95.5556	4.16667	65.3846	79.4872	82.1429	91.6667
87.234	38.806	67.8571	78.5714	94.5946	80
94.0299	20	67.6471	70.2703	90.2439	86.6667
92	17.6471	80	71.7391	89.7436	89.5522
94.5205	3.125	66.6667	81.4815	92.8571	84.7826
	22.6415
92.7273	11.3208	80	57.6923		92
89.1892	28.125	76.5957	76.8116		88.3721
91.4894	14.2857	85.2459	94.8454		91.8919
93.0556		90	68.4211		88
95.9596	43.3333	82.9787	46.875		91.3043
	4.7619
83.7838	16.129	80	73.4694		95.7447
82.3529	56.4103	89.0909	88.0952		94.2857
74.359	56.1404	76.087	74.359		90.566
83.7838	38.8889	76.087	78.3784		90
94.0299	67.9245	78.3784	60		88.5714
	60.4167
95.4023	51.6667	83.3333	84		88.5417
93.5065		50	76.9231		92
88.0597		65	75		94.9153
86.5385		62.963	79.0698		91.8033
93.75		58.3333	79.1667		78.7234
80					90.5405
78.0488					88.8889
90					88.1356
95.122					85.4545
83.7209					93.1507
					86
					89.6552
					84.2105
					83.6066
					90.2778

## Sheet: Figure 6-source data E
WT	Dp10	WT	Dp16	WT	Dp17
1.3148	1.52614	1.25385	3.41624	1.16344	0.519585
0.523368	0.916637	0.849282	3.39199	0.578243	0.593429
0.620145	1.14742	0.702564	1.09175	0.415116	0.820145
0.636638	1.04675	1.96896	1.33013	0.670635	0.888671
0.401904	1.09047	1.19082	1.18166	0.675613	0.915208
0.777701	1.78747	0.745704	1.43197	0.776048	1.00585
0.931883	1.33385	1.30778	2.51494	1.05404	0.544343
0.971061	2.29875	0.517697	0.868604	0.947735	0.547035
1.40855	1.56311	1.05554	0.574642	1.10286	0.91234
0.732896	1.60556	0.665795	1.24582	0.703601	1.05882
0.48021	1.13475	1.37491	1.17666	0.654152	0.668206
0.47422	1.55964	1.60704	1.69482	1.85588	0.717303
1.28936	1.57083	1.02072	1.67374	0.98303	0.513058
0.361	3.02917	0.967085	2.07016	0.566056	1.11611
0.69962	1.50403	0.857076	1.87986	0.667305	1.26432
1.6063	2.23931	0.485289	1.2055	0.99715	0.646976
1.39339	1.84826	0.838969	0.974071	0.672448	1.44144
1.85093	0.605711	0.498285	1.73382	0.869825	0.447302
0.8838	1.95561	0.964223	0.73088	0.621274	1.09694
0.774125	2.2312	0.451637	1.51646	0.846694	0.713622
1.23635	0.832212	0.776897	1.00269	0.872144	0.487608
1.10316	1.35626	1.66685	1.09348	0.709952	0.919471
1.49147		1.38799	1.65784	1.28643	0.625384
1.94415	1.22862	1.18742	1.70453	0.984612	0.53098
0.767323	1.77788	1.03578	2.10855	1.01349	0.805454
1.66065	2.66183	0.62183	1.19862	1.39727	0.68537
1.2053	1.48135		0.973052	0.602374	0.550935
1.02695	1.30991	0.996459	1.68283	0.871726	0.703194
0.43274	2.05915	0.804505	2.07806	0.73861	0.689129
	1.84714	1.50604	1.5263	0.738874	0.554287
0.497491	0.217068	0.576923	0.729305	0.816201	0.640273
1.21502	0.131046	0.812122	0.729305	0.948603	0.578177
0.467386	2.50473	0.802667	0.997155	0.888012	0.75672
0.265026	1.24228	0.684464	1.10427	0.92345	0.679876
0.494376	1.13149	0.631525	1.77709	0.691876	0.847562
0.637853	2.43161	1.72766	1.38056	1.17507	0.435632
1.31994	2.00828	0.961014	1.19592	2.38769	0.514662
0.943689	1.52618	0.875046	1.79973	1.50264	0.464697
0.656864	1.3214	0.80102	1.23811	1.06153	0.86488
0.655357	1.43007	0.928706	1.48072	1.31658	0.518904
0.591182	1.22031	0.62217	1.72598	2.91608	1.27869
0.712821	0.892475	0.508028	1.67188	1.398	0.461873
0.507396	1.85824	1.56527	1.32167	0.937647	0.733753
0.375612	1.1255	0.927051	1.77221		0.968799
1.01312	0.794041	0.446475	2.02783		0.452763
1.06919	0.393376	0.704426	1.09337		1.24647
1.16223	1.11131	1.21705	2.79817		1.13401
1.37099	2.20464	0.947087	1.69768		0.72627
0.697984	2.50855	3.025	1.48745		1.00388
0.723266	2.27669	1.14903			0.64824
0.576654	0.550553	0.819602	0.49282		1.54451
1.22776	0.687659	1.15653	0.599958		0.499356
1.15939	0.500094	0.80412	0.526335		0.590638
1.20461	1.39546		0.694678		0.898923
1.28395	0.884912	1.06262	0.70535		0.825454
1.08543	1.35706	0.971476	1.00019		0.545035
1.53595	1.22862	0.567598	0.905891		0.996524
0.981563	1.77788	0.956919	0.973186		0.899879
1.95317	2.66183	0.94985	0.479579		0.890418
0.430521	1.48135	0.692083	0.575945		0.501795
1.25054	1.30991	0.434408	0.555671		0.683733
1.27632	2.05915	2.01282	0.50297		0.710523
0.766093	1.84714	0.893229	0.718061		0.521047
1.70664	0.217068	0.441555	0.957311		1.0557
1.97358	0.131046	1.16462	0.642828		0.438083
1.54033	2.50473	0.671804	0.644383
1.48565	1.24228	0.886716	0.781159
0.644233	1.13149	1.27423	0.888882
0.987843	2.43161	2.58811	0.983227
0.850856	2.00828	0.770053	1.00836
0.89568	1.52618	1.10356	0.707947
1.48252	1.3214	0.822115	0.307322
0.848241	1.43007	1.18846	0.373941
0.982551	1.22031	1.24754	0.972591
1.19383	0.892475	1.41718	0.624566
1.37544	1.85824	0.686151	0.949959
1.26498	1.1255	0.854984	0.35129
1.22873	0.794041	0.530833	1.51837
0.845514	0.393376	1.16246	0.57664
1.2136	1.11131	0.936006	1.14926
0.694608	2.20464	0.929823	0.582885
0.981323	2.50855	0.782801	0.642637
1.38526	2.27669		0.687116
0.609275	0.550553		1.38844
0.700559	0.687659		2.06661
			0.866816
			0.220046
			1.1452
			0.85184
			0.833054
			0.62336
			1.2721
			1.25045
			0.863571
			2.13646
			1.33305
			1.01785
			0.908052
			0.924988
			2.08781
			1.59175
			0.928872
			0.909162
			0.727118
			0.657048
			1.01346
			0.912147
			1.61928
			1.91466
			0.961925
			0.719588
			1.97372
			1.55561
			0.984542
			0.882595
			2.09005
			1.47548
			1.65397
			1.64127
			0.986127
			1.41056
			0.804321
			0.991451
			0.859978
			0.924988
			1.4687
			0.802815
			2.11781
			0.882304
			1.45523

## Sheet: Figure 6-source data H
WT	Dp10	WT	Dp16	WT	Dp17
1.34382	0.875489	0.337113	0.240935
0.910183	0.7598	0.480558	0.287547
0.654821	0.118061	0.238391	0.142132	1.58896	0.534962
0.482122	0.593257	1.2183	0.13171	0.430482	0.824147
1.59604	0.34123	0.237489	1.18638	1.01569	3.27258
1.05986	0.222271	0.103317	-0.0205977	0.914945	3.8879
0.869653	0.25658	1.40089	0.121617	0.867432	0.988454
0.267226	1.62118	0.0274089	1.81153	0.0977633	2.03972
0.577033	0.140891	1.76311	1.10801	0.0402994	1.37167
0.537337	0.190591	0.492293	0.90835	1.27217	2.77792
0.29852	3.69793	0.371004	0.506818	0.903378	2.08487
0.483276	0.872988	1.86782	0.612432	0.678622	0.425507
0.878824	0.930896	0.528729	0.596266	1.25152	0.591058
6.14644	0.281206	1.45415	0.0856732	0.386824	2.79533
2.22521	1.03915	1.46276	0.203187	1.77255	0.628496
0.339948	0.207201	3.94286	0.672256	0.609342	1.26968
0.38657	0.42742	0.289434	0.768761	0.603247	0.556853
0.276909	0.604544	0.208767	1.71683	0.117167	0.161944
0.519124	0.0429023	3.17393	0.301005	0.667303	1.56882
0.346361	0.021868	0.125474	1.74998	0.466055	0.994549
0.297943	0.321863	0.322752	0.398659	1.9789	2.9625
0.927177	4.04256	0.332189	0.587978	3.4594	1.13883
0.781284	0.299803	0.663557	0.00779594	0.203611	0.985469
1.69519	1.07089	1.36183	0.0219107	0.360207	1.64394
0.0778526	0.442618	1.29765	0.682267	6.46233	3.67695
0.442811	0.394906	1.40434	0.176352	0.371774	0.446278
0.912427	0.553754	0.870437	0.250455	5.69055	0.709219
2.77089	1.89995	0.224031	1.77329	0.524514	0.854372
0.986945	0.22458	1.51742	0.765233	0.905244	1.24816
3.44514	0.77936	1.01774	1.65405	0.111943	1.75004
0.250937	1.13592	0.843766	2.77658	0.877382	1.44033
0.424277	1.16894	4.36523	0.573781	4.93083	0.648397
0.556511	3.65259	1.75917	0.263831	1.56869	0.417422
0.78558	0.0798406	0.933379	0.001313	4.84115	0.283091
0.246127	0.833741	0.973753	0.321275	0.333962	1.69257
1.70179	-0.0049379	0.593804	0.205074	0.184705	1.21993
2.09086	1.04364	0.648458	0.2228	1.65824	0.641681
0.462178	0.349695	1.04539	0.249716	1.64494	0.238687
0.172186	1.12989	0.191616	0.621869	0.477747	0.17886
0.316156	0.61442	0.684319	1.12746	0.197392	0.0619416
0.459035	0.714076	8.66457	0.185789	3.33129	2.08661
1.0226	0.508735	0.660521	0.630486	0.118784	0.494911
0.683615	0.342449	0.556302	1.43248	0.551753	3.50082
0.697275	0.381952	0.450933	2.32622	3.79573	4.98817
1.79093	0.0498924	0.922957	0.226821	3.86712	0.259832
1.32567	0.55369	0.516337	0.594789	0.790938	2.61175
0.373872	0.182768	1.81448	0.403009	0.273513	2.77916
1.1245	0.460318	2.36044	1.2787	0.321524	3.25554
1.38711	0.223425	0.582151	0.20729	4.36004	0.774146
0.533617	0.0706702	0.392012	0.143856	0.0788574	1.22279
1.81915	0.085997	0.12933	0.976215	1.91721	2.49247
0.448518	0.446979	1.75285	0.695151	0.830366	1.58648
0.199634	0.303907	0.262354	0.15715	4.0573	1.0953
1.37852	0.241061	0.321603	0.313232	0.420034	0.335579
0.751912	0.053676	1.12647	0.214265	0.134207	0.545161
0.197774	0.0832394	0.113739	0.219271	0.329485	2.31373
1.2668	0.59563	0.765561	0.106353	3.37196	1.44095
0.808538	0.143457	0.348601	0.0811598	0.444039	0.0492548
1.1465	0.718309	0.0688504	0.0100116	0.396526	0.816684
0.312244	-0.0089781	0.374205	0.0966696	0.0477622	1.87653
1.8491	0.213421	1.08019	0.28845	0.1607	1.33747
1.23031	0.314809	0.829734	0.279669	0.326126	3.81065
1.31952	2.32275	1.35879	2.01316	0.334584	0.635959
1.49472	-0.0355275	2.20592	0.437639	1.94979	0.118784
0.901974	0.947185	2.03236	0.589783	4.54997	1.89308
1.67325	-0.0156475	1.77928	3.60837	1.4519	1.08808
1.18042	0.119536	2.85824	0.569678	0.198636	0.898651
0.608263	0.555663	0.0259317	0.174137	0.0573396	1.30774
0.709459	0.445472	1.55993	0.46751	0.172143	0.616804
1.06935	0.0279478	0.400055	0.0166587	0.758847	1.25202
0.380477	0.3525	0.491965	1.227	0.231348	0.8637
0.214447	1.91071	0.492047	0.0625316	0.0262443	0.820043
0.679767	0.457517	0.174629	0.374697	0.361575	0.177989
1.23384	0.31279	0.207782	0.12293	0.316798	0.622153
2.0334	0.188201	0.314135	0.467592	0.193288	0.573022
1.80311	0.995583	0.462914	0.461766	1.05015	0.89492
0.628592	1.35364	0.625398	0.269411	0.81146	0.965817
1.42552	0.454035	0.867154	0.972604	0.0703995	2.97357
0.685411	0.0795149	2.13083	1.286	0.284086	0.51618
2.81071	-0.0104452	1.37512	0.192929	0.214433	1.96061
0.531116	0.199493	0.968501	0.177829	0.337694	0.41083
0.443131	0.0788562	0.68793	0.288778	0.302121	1.51931
0.614997	1.13589	0.402434	0.223128	0.242791	1.39481
1.20774	0.338385	0.936579	0.775901	0.167665	7.78462
2.71932	0.0700108	1.62951	1.34771	0.267792	1.23137
0.555193	-0.0403691	0.347453	0.237489	0.658721	4.88804
0.149337	0.287477	1.14584	0.542351	0.486205	1.24319
1.65015	3.88626	0.377734	0.453888	0.285578	1.02005
2.19612	0.0517553	0.630568	0.123422	0.582351	0.357097
1.65532	0.10511	0.0994597	0.434849	0.306847	0.734469
0.386847	0.293594	0.723135	0.968583	0.416303	0.810963
2.32155	0.279102	1.69278	0.548834	0.358714	0.187939
0.667643	0.711588	0.0627778	1.24481	0.433218	0.147516
2.08056	0.243814	0.981877	1.13812	0.227741	1.01022
0.55077	-0.204292	0.642631	2.6905	0.160451	0.786211
1.26678	1.52735	0.224687	0.886193	1.37441	1.27354
0.75431	0.284089	5.11586	0.372235	0.513817	2.24706
0.302063	0.581447	0.456924	0.0210901	1.59506	1.06321
0.600926	0.048744	1.44077	0.32029	0.224383	3.78068
0.256047	0.206927	0.466443	0.116447	0.200875	0.314808
0.579094	0.204198	0.184394	0.369363	2.0646	1.94445
0.0701049	0.25473	0.244218	2.80424	0.221149	0.669915
0.470691	0.228005	0.980482	0.72773	0.767554	0.281474
2.59774	0.132964	0.0224031	0.401532	0.204109	1.25637
0.601208	0.238357	1.3171	0.0935512	1.88288	0.34043
0.582576	0.513883	2.19476	0.126622	0.296897	0.787579
1.2441	-0.23271	0.0613007	-0.0233057	1.86472	0.814197
0.878428	0.0494028	0.555153	0.51289	0.0211447	2.89596
0.313449	0.0301122	1.59923	0.0878069	0.291175	0.367172
0.87871	0.446413	0.600533	0.53595	0.290678	0.792679
1.14991	0.0360405	-0.0247829	0.110702	0.114057	0.281474
1.64779	0.195823			0.557226	1.64568
1.06446	1.45978	4.75712	1.7404	0.16468	1.20177
0.598855	0.620875	0.0107858	0.719949	0.177367	0.350256
0.728055	0.164017	4.24449	0.750509	0.320156	0.447522
0.481889	0.115179	1.51959	0.406563	1.13211	0.990071
	0.11979	4.53901	0.837993	2.07442	0.573769
2.31142	0.189895	0.599808	2.01574	0.28732	1.62441
0.145589	0.16063	1.39646	0.441317	0.494911	1.04256
0.716636	2.21898	-0.147705	0.798745	0.934349	0.977633
0.855077	1.38902	0.481764	0.409859	1.96895	0.748524
1.21312	0.176344	0.526704	0.4545	0.660462	2.12418
2.09535	0.0426275	0.290916	1.00158	0.843924	1.6631
1.60365	0.339797	0.369412	0.490153	0.306474	0.54939
0.623075	0.15583	1.86204	0.365817	0.250627	0.596033
2.56786	-0.0231487	1.80961	-0.316981	0.517673	0.650512
1.80525	-0.0827143	3.12188	1.32575	0.500384	0.638695
0.445997	0.060883	-0.160588	1.49592	1.03149	3.3043
0.426362	1.18397	1.09505	0.977909	0.676507	1.20699
0.653116		3.15903	0.384093	3.2589	2.82419
0.121611	0.049314	0.876343	-0.0197739	2.00377	1.36744
0.396231	0.4203	0.0260656	0.0467383	1.13659	0.83161
0.0796262	0.734643	-0.162386	1.06419	1.4116	0.466179
3.02145	0.170111	0.875144	1.57292	2.6166	0.605486
0.640629	0.200332	0.798745	1.48424	0.317171	0.370406
1.33383	0.0723875	0.646546	0.489853	0.511578	1.30364
0.770022	0.170744	1.21909	0.29511	3.67881	0.389934
0.0846029	0.448802	0.646247	1.17295	0.348639	2.26298
1.76092	1.43753	1.10015	0.58303	0.317793	1.67441
3.0334	0.277244	0.329864	0.693884	1.26135	0.904248
0.202866	0.130297	0.213019	1.00607	0.646158	1.16595
2.33033	0.0187303	1.0576	1.664	0.223139	3.30841
0.196623	0.878151	-0.102465	0.284025	0.256971	0.16667
0.257428	-0.0005429	0.111752	0.316981	0.224881	0.681482
0.929093	0.490244	0.906303	0.794551	1.5208	0.308589
0.679899	0.345469	0.0134822	3.85351	2.43326	0.685089
0.501012	0.608055	1.26703	0.252267	1.17129	0.740315
0.977955	0.254533	0.230995	0.956037	0.218786	0.716807
0.596111	0.0821598	1.14689	1.01656	1.20102	0.269906
0.277697	0.0964563	1.42132	0.624375	0.286573	0.162441
1.70074	2.0701	0.336456	1.4357	0.341177	4.56627
1.20389	1.15585	1.14359	0.311888	0.321151	1.34456
0.625247	0.653569	0.523109	1.49952	1.22515	1.35277
2.5807	0.0408989	0.188152	1.50971	0.170899	1.16458
1.38314	0.210738	0.656433	0.373906	0.572774	0.492921
0.913168	0.205128	0.564155	2.00345	0.565684	1.36334
0.438487	0.426724	0.49195	1.03543	2.3661	2.05266
1.38088	0.422924	1.08756	0.260955	0.340306	1.72267
0.567337	3.9748	0.331362	0.18965	0.318912	0.290678
0.183593	0.276611	1.98398	0.24268	0.0385581	0.384212
4.2068	0.0609865	2.75276	1.40814	0.787579	0.577624
0.443464	0.625699	0.668118	1.56603	0.608844	0.440308
2.53284	0.183412	1.14419	0.596213	0.728623	0.632725
1.01044	0.258152	0.851476	2.09064	0.621531	2.009
0.791467	0.379672	2.7992	0.91589	1.49954	0.845292
1.57895	0.72478	1.34882	0.731035	1.11881	0.512698
0.362933	0.644068	0.304398	1.08756	0.55735	0.650636
0.187755	0.187846	1.01566	2.15505	0.99629	1.17702
2.21994	0.132469	0.767886	0.153098	1.10537	0.816933
1.85158	0.049495	0.753505	0.132126	1.88375	0.85773
0.729666	0.0570051	1.8186	0.526704	1.32279	1.68511
0.13826	0.171287	0.242979	0.812227	0.639317	3.3094
2.1148	1.20408	0.472476	0.698677	4.042	0.891437
0.386911	0.178526	-0.229796	2.2716	0.230229	1.49804
0.399036	0.128307	0.298406	-0.115348	0.951513	1.40003
0.519923	0.330268	0.13602	1.27422	0.141545	1.38324
0.387725	0.16432	2.63382	0.844585	0.291797	0.200626
0.146132	0.184226	0.326269	1.32066	0.110575	3.85717
1.45354	0.138532	0.312487	0.563855	0.94716	0.088186
0.307013	0.496397	0.178864	1.5151	0.845292	5.22773
0.412066	0.383473		2.51518	0.815192	5.12163
1.17141	0.190108			1.305	0.107589
0.131021	0.169115			0.100748	0.161073
1.03044	0.185221			0.232841	1.7575
1.22362	0.64823			0.115674	3.20666
0.264576	0.324658			0.228488	0.153237
0.213272	0.238788			0.372396	1.84059
0.0708493	0.424462			0.960095	1.8177
0.338954	0.118896			2.1437	0.389188
0.286926	0.401027			1.62068	1.50414
0.517299	0.518837			0.514563	3.10902
0.446721	1.40115			1.01532	2.38848
2.77932	0.753554			0.586331	1.28908
2.14783	0.402836			0.424014	2.30005
1.02718	0.167034			3.20293	6.51407
0.506531	0.327282			0.245901	2.50092
0.233812	0.12324			3.02905	2.30739
0.314976	0.221868			0.0174133	0.479488
0.685057	0.246208			0.0634342	0.979374
0.542725	0.0846029			3.90369	2.24992
0.205852	1.3398			0.399138	8.12331
0.675194	1.4663			0.697652	8.32543
1.88759	0.413242			4.41515	3.94014
0.706864	0.734462			2.28736	0.675761
2.44814	0.159162			1.28983	1.50961
2.99829	0.215805			0.804993	3.2099
0.333254	0.388449			0.489936	-0.0410457
	0.913349			1.29431	3.94486
	0.349179			0.859845
	-0.0365557			0.188064
	0.651397			1.00052
	4.94416			0.647153
	0.00561003			1.9427
	0.0949181			0.192915
	0.248832			1.32976
	0.380306			0.306474
	1.92614			0.639691
	0.11772			0.378988
	0.290364			0.26406
	0.149209			1.0749
	0.120525			0.510334
	0.586429			0.156098
	0.745501			3.25878
	0.397769			0.402123
	4.65931			1.94432
	0.092837			0.0845789
	0.0401751			1.14866
	0.241322			0.0925393
	0.371076			5.22213
	1.4473			0.857108
	0.0997138			1.04642
	0.717451			0.378242
	0.48572			0.24503
	-0.0048862			0.597028
	0.00705778			2.0748
	0.314614			0.632974
	0.0939228			0.725389
	0.230645
	1.17847
	0.00262405

## Sheet: Fig 6 supp-source data 6C
Control	Dp10	Control	Dp10
-104.192	168.338
-73.231	155.978
-128.849	129.59	323.744	210.917
0.062	76.197
-17.736	51.416
1.236	85.899
-41.652	62.601
18.107	231.681	219.275	183.046
-242.187	231.186
-242.187	148.501
-146.771	139.354
-59.141	90.04
-204.675	169.265	157.755	28.443
6.365	123.102
-219.445	11.556
-3.523	-13.225
16.562	74.59
13.595	15.82	116.149	142.923
	79.534
-108.271	48.635
-260.108	-53.023
118.529
-298.979	47.893	384.508	82.207
-298.979	61.86
-291.996	227.788
168.647	-49.5
-169.821	-58.523
-300.524	-0.494	255.335	53.548
-117.911	-49.315
-292.243	74.034
	-32.073
-233.411	132.062
-185.95	110.124	209.511	61.813
-135.708	-42.641
-209.31	154.742
-228.838	-58.09
-200.04	-73.602
-123.163	60.315	64.379	390.564
82.562	-57.225
-133.422	-4.82
-91.523	43.197
-251.024
	22.742	139.015	33.942
84.169	-220.063
223.091	-222.658
198.372	-173.281
0.124	-117.848
43.568	-147.759	129.452	45.916
171.305	-56.359
12.236	-69.028
96.467	-130.455
80.214	-189.349
91.585	-205.911	71.917	890.882
220.125	-271.417
276.423	-180.017
142.754	-233.102
360.778	-184.22
99.804	-134.349	116.427	210.315
	-193.119
-62.045	-150.231
-17.18	-206.529
291.007	-205.911
182.737	-6.179	211.721	224.266
175.63
138.119	-227.911
-47.523	-36.275
	-128.725
142.877	-71.006	1480.76	67.747
340.322	-82.006
10.876	-69.214
-29.045	-76.444
-59.264	-136.141
-63.714	-182.18	536.083	250.344
44.68	-233.473
-67.422	-188.731
	-127.057
	-172.478
	-120.877	81.898	49.918
	-130.641
	-134.225
	-12.483
	187.99	93.129	102.972
	-17.674
	-161.169
	-117.231
	-96.096
	-34.545	66.711	145.642
	-83.489
	-12.792
	-42.578
	-163.888
	-24.781	125.064	10.336
	-102.708
	-165.989
	-175.012
	-38.562
	-129.652	83.443	5.268
	-108.826
	-211.473
	-69.894
	31.146	71.779	77.541
	-50.427
	7.354
	-21.506
	-67.422
	-70.697	223.369	973.907
	54.815
	-17.86
	-67.298
	39.18
	-51.663	188.222	72.226
	-22.185
	-72.984
		408.392	257.992
		18.755	106.633
		106.679	95.138
		219.816	133.407
		667.543	457.723
		237.768	54.105
		829.979	187.758
		60.454	273.658
		102.214	281.614
		134.071	879.958
		189.257	19.234
		59.295	200.859
		409.984	-1.189
			251.426
		503.716
			84.247
		111.345
			272.205
		41.482
			148.022
		76.166
			172.03
		110.588
			122.561
		246.358
			82.501
		164.692
			92.017
		167.983
			12.02
		431.459
			133.392
		319.372
			44.031
		90.07
			110.897
		270.907
			53.826
		334.173
			17.026
		128.556
			20.718
		438.257
			107.683
		108.054
			73.215
		48.094
			58.075
		332.103
			12.931
		181.146
			20.054
		47.647
			143.495
		305.19
			34.561
		194.787
			173.05
		276.206
			-32.259
			-2.162
		75.224
			51.416
		445.471
			75.842
		296.399
			559.582
		317.889
			-8.559
		360.098
			228.189
		217.298
			-3.769
		403.109
			28.798
		284.38
		146.539	364.918
			292.553
		170.919
			18.354
		257.62
			231.496
		91.662
			1254.81
		51.663	300.462
			205.417
		163.765
			123.596
		297.249
			653.824
		489.874
			888.966
		434.394	298.176
			52.22
		151.436
			-6.86
		343.427
			131.012
		165.125
			51.787
		677.137	745.965
			222.226
		127.953
			45.978
		106.756
			-26.511
		148.161
			188.793
		290.96	2552.2
			33.989
		1785.84
			69.028
		364.608
			192.81
		98.074
			183.293
		1083.69
			467.317
		1442.24
			160.119
		1087.09
			-134.164
		254.052
			1003.04
		1524.62
			186.568
		438.457
			381.85
		1366.36
			32.011
		361.705
			135.894
		831.926
			134.102
		495.373
			167.288
		198.372
			149.737
		394.643
			87.32
		168.152
			156.534
		380.305
			337.48
		46.04
			-152.826
		309.114
			32.444
		1706
			19.776
		394.828
			293.171
		382.592
			23.668
		817.033
			128.601
		576.885
			958.674
		205.85
			407.744
		577.071
			107.714
		755.173
			75.641
		1082.15
			78.669
		699.06
			124.709
		393.283
			105.489
		478.132
			1457.26
		316.469
			912.202
			115.81
			27.994
			223.153
			102.337
			-15.202
			-54.321
			39.983
			777.543

## Sheet: Fig 6 supp-source data 6F
WT	Dp10
2.26796	1.29835
3.6288	1.54885
4.02481	1.31531

## Sheet: Fig 6 supp-source data 6I
WT	Dp10-2
95.5556	94.7368
87.234	91.358
94.0299	88
92	89.0909
94.5205	86.1538

## Sheet: Fig 6 supp-source data 6J
WT	Dp10-2
0.989405	0.500094
0.675369	1.39546
0.605566	0.884912
0.720956	1.35706
0.911703	1.03326
1.15317	0.983889
1.12695	0.658899
0.890697	0.772905
1.4717	1.51297
1.12417	0.944952
1.21288	0.868173
1.01969	1.61025
1.27759	0.508646
1.0639	0.60055
0.643293	0.841824
0.815205	0.573567
0.968745	0.764525
1.16464	0.55456
0.850299	0.540338
0.944548	0.540818
1.1651	0.917142
1.80194	1.64696
1.02267	1.10303
0.903439
1.18367
0.941012
1.13841
0.96296
1.0618
1.34828
0.682576
0.696491

## Sheet: Fig 6 supp-source data 6K
WT	Dp10-2
0.639693	0.943776
1.43121	1.1841
0.681154	1.13109
1.98111	1.71767
1.04272	0.784609
2.62674	1.65398
2.45171	1.35972
0.946917	1.00903
0.456458	0.324578
1.88245	0.51755
1.12324	0.931016
0.164468	1.15022
0.445622	1.82678
0.339222	2.83973
2.44507	0.231527
0.110718	1.53655
2.11221	1.9285
0.265018	3.25371
0.273537	0.543894
0.368472	0.350844
1.44299	0.793678
0.400392	0.630977
1.85116	0.650098
0.954573	0.63561
0.845386	0.477346
1.75088	1.15771
0.851511	0.288496
0.356969	0.794856
1.74586	1.42591
0.912406	1.37844
1.05316	0.463525
0.674676	1.09796
0.543423	0.347978
0.800746	0.521162
0.432823	1.17495
0.314959	1.07138
1.59682	0.402944
0.338908	1.10946
1.01036	0.386769
0.558186	1.12391
0.310718	0.566038
1.19537	0.787436
0.408363	1.4
0.245072	2.8603
1.7338	0.328268
2.69434	1.06918
0.311229	2.00585
1.49843	0.666391
1.29203	0.225363
1.09254	0.288143
1.06317	1.01237
0.219866	1.89352
0.351119	0.855516
0.29678	0.51166
0.715233	0.506439
0.366195	1.54495
0.653042	0.706792
0.328543	0.275069
0.514527	1.1247
1.23388	1.58323
1.06349	1.71716
1.40722	0.426816
4.15398	1.87452
0.221908	0.353278
1.42159	0.287358
1.01288	0.492854
1.12042	0.659128
0.850333	0.809658
	1.13365
	0.83616
