# Supplementary material for: Trisomy 21 induces pericentrosomal crowding delaying primary ciliogenesis and mouse cerebellar development
Source: eLife. 2023 Jan 19;12:e78202. doi: 10.7554/eLife.78202 (PMC9851619; doi:10.7554/eLife.78202)
Supplement: Figure 7—source data 1. [file elife-78202-fig7-data1.xlsx]

## Sheet: Figure 7-source data D
WT	Dp10	WT	Dp16	WT	Dp17
1.11605	0.231128	1.26168	2.1596	0.42719	0.634141
1.0829	0.233047	1.19008	1.86977	0.729935	0.687126
0.962146	0.251101	1.10952	2.34366	0.638048	0.630743
1.59042	0.54448	0.770029	2.05487	2.64084	2.4182
0.46739	0.254331	0.267884	0.55124	0.968179	0.906701
0.781091	0.0974823	1.21395	1.5189	0.595812	0.67738
0.423712	0.42612	1.23772	1.12911	0.669081	0.322916
0.642071	0.5319	1.46818	1.35181	1.01575	0.476665
0.652027	0.414018	1.2929	0.823692	0.576787	0.202089
2.26149	1.7774	0.464483	0.447401	0.573813	0.3885
1.02318	1.02099	0.551547	0.464367	2.12789	1.07856
1.00045	0.882945	0.985175	0.629159	1.03668	0.632529
0.997063	0.792891	1.96047	1.1621	1.22895	1.03087
0.691024	0.982942	0.493225	0.351209	1.31212	1.0654
1.0372	0.953615	0.776844	0.517904	1.36673	0.749469
1.18693	0.757142	0.941854	0.496416	0.770793	1.17848
1.42282	1.03186	0.677347	0.553822	0.967854	0.745014
0.662026	0.611596	1.15026	0.761581	0.337726	2.0177

## Sheet: Figure 7-source data F
WT	Dp10
47.116	44.816
36.328	56.863
42.263	34.694
43.395	32.179
41.502	37.582
77.757	38.743
35.874	67.452
40.445	41.902
51.473	31.878
50.404	30.424
48.939	27.055
56.742	32.781
48.918	35.205
58.506	30.163
67.533	39.775
80.651	53.964
88.978	56.475
56.445	55.544
73.09	50.703
70.439	30.938
67.14	32.274
48.104	27.595
40.476	31.499
48.475	40.434
54.605	58.412
52.441	47.818
55.947	45.22
59.668	45.235
70.493	42.073
88.831	42.35
69.611	58.979
63.811	56.936
56.354	56.911
58.034	66.709
43.065	60.326
52.78	40.881
55.165	42.326
48.318	22.296
40.772	14.939
32.232	14.754
41.016	30.243
66.508	35.872
43.375	35.156
44.547	33.239
71.457	46.655
52.204	57.47
58.26	54.021
51.699	70.332
54.747	56.036
55.042	62.385
39.794	47.638
39.852	28.573
58.749	37.518
43.521	32.232
27.932	45.424
19.296	33.974
39.639	38.198
44.086	30.026
	28.344
	28.621
47.349	46.669
55.969	49.891
54.627	45.334
52.728	29.285
49.663	41.729
56.645	36.46
64.341	32.581
60.768	49.891
61.677	40.195
58.973	40.468
53.039	39.775
46.699	40.629
39.288	38.449
48.939	34.065
45.635	33.731
56.863	57.511
41.507	39.809
61.325	38.84
65.484	45.424
63.633	37.737
75.082	50.656
107.343	55.445
84.505	69.393
76.773	52.702
53.811	54.527
46.411	53.272
44.938	43.026
43.879	44.292
43.383	53.401
46.89	50.818
34.704	33.741
46.047	23.729
54.872	27.358
46.047	19.131
39.809	33.115
43.753	46.831
48.068	41.803
49.642	42.978
64.581	39.087
47.349	41.564
47.897	42.657
31.149	46.669
40.932	51.141
54.627	46.47
102.383	43.949
62.17	35.205
46.669	40.806
63.482	74.836
50.445	66.889
55.028	52.573
40.397	47.575
52.858	50.466
75.91	82.42
46.765	58.011
40.434	41.803
46.699	44.043
41.166	57.511
44.035	53.059
49.002	66.421
63.438	54.091
83.067	45.022
74.693	48.918
57.416	41.149
58.839	44.915
54.928	45.643
50.486	54.872
59.414	69.749
40.907	58.034
52.04	50.608
65.289	61.146
62.813	54.021
56.893	44.869
90.44	50.104
63.725	59.535
55.741	34.813
42.609	48.104
39.471	61.168
34.536	55.673
32.99	58.886
39.861	95.384
34.095	68.331
36.956	52.211
36.956	42.326
43.502	36.498
40.408	31.889
39.262	22.919
47.291	31.986
50.322	32.018
70.043	46.025
63.676	53.478
59.501	46.765
55.575	56.209
43.918	63.985
52.734	58.933
31.368	72.476
49.455	58.959
50.486	41.783
52.211	56.319
35.785	40.084
28.222	39.639
30.026	32.626
	27.26

## Sheet: Figure 7-source data G
WT siControl	WT siPCNT	Dp10 siControl	Dp10 siPCNT
1.22703	0.720182	1.70109	1.20915
0.925961	1.05981	1.61151	0.769037
0.905157	0.877616	1.23468	0.997986
0.905448	1.00762	1.17168	1.08691
0.95487	1.14848
1.08154	1.0367

## Sheet: 7I
WT siControl	WT siPCNT	Dp10 siControl	Dp10 siPCNT
0.197133	0.189415	0.1875	0.333333
0.203922	0.285235	0.168981	0.244696
0.22093	0.21223	0.170599	0.284264
0.39726	0.30303	0.19788	0.231293
0.235294	0.204778	0.21365	0.199234
0.18251	0.199324

## Sheet: Fig 7 supp-source data 7B
WT	Dp10
158	159
151	146
112	129

## Sheet: Fig 7 supp-source data 7D
WT	Dp10
0.597652	1.78361
1.20228	1.95282
1.20007	1.12084
1.09942	1.06848
1.10399	1.51838
0.796588	1.24318
1.67344	1.82263
0.480488	0.339676
0.914103	0.442374
0.931966	0.386012

## Sheet: Fig 7 supp-source data 7F
WT	Dp10
0.428032	0.523012
0.708332	0.87561
1.43383	1.55934
0.913529	0.783566
1.51628	1.08454
1.9309	1.65933
1.15306	0.962903
0.812995	0.590353
0.788796	0.848619
0.31425	0.401436
1.21445	0.91171
0.948611	0.440116
0.846244	0.561544
1.21053	1.18209
0.780164	0.833562

## Sheet: Fig 7 supp-source data 7G
WT	Dp10
91.425	111.876
112.934	175.784
117.417	232.773
78.028	59.143
65.042	63.267
76.833	55.576
55.248	45.523
72.867	58.498
63.606	79.763
84.054	237.33
126.652	137.027
239.897	126.182
131.409	175.154
130.008	229
193.428	185.431
227.828	154.45
221.33	118.286
143.646	118.787
132.609	96.688
120.237	67.433
100.06	88.724
60.057	32.981
90.188	68.461
46.88	75.378
69.624	119.03
108.584	152.615
184.557	196.04
183.857	144.506
175.568	106.269
74.744	50.575
70.938	67.312
50.895	42.322
88.285	80.946
109.748	94.046
177.389	268.425
123.966	96.77
100.897	107.458
118.074	163.297
213.365	138.785
137.303	76.057
112.113	77.454
90.792	220.731
253.965	93.053
99.927	88.695
98.831	90.408
95.364	91.911
95.864	109.536
111.447	102.389
78.448	49.582
59.587	66.123
79.805	100.058
91.28	154.139
168.782	71.656
95.052	193.326
88.714	102.888
101.483	298.428
156.318	138.927
125.984	75.096
105.687	65.118
131.156	96.568
100.223	93.088
84.288	45.414
93.776	91.281
85.396	50.112
59.31	71.656
56.43	130.955
104.794	157.904
154.832	225.209
167.278	96.687
150.411	82.248
74.567	62.427
64.506	67.213
81.745	97.368
100.897	105.797
127.223	163.136
136.253	75.796
72.115	48.743
57.288	57.93
76.346	92.483
122.652	152.516
238.955	351.542
136.68	133.765
104.296	38.727
145.419	54.496
203.476	211.501
298.547	197.13
147.774	363.298
117.203	232.041
107.141	265.147
79.21	111.184
59.948	111.184
77.933	123.551
56.173	125.607
49.122	88.629
36.659	75.167
43.937	62.255
113.337	89.629
154.262	40.872
310.315	73.367
140.666	98.734
114.087	121.857
89.962	155.981
39.015	422.485
55.108	242.002
28.054	140.664
30.464	88.964
51.771	56.107
106.131	38.727
133.045	71.054
264.574	94.782
125.522	99.446
142.998	171.685
149.274	85.56
84.263	78.074
85.347	97.676
83.009	95.834
99.075	119.519
94.431	92.202
98.735	90.74
95.329	61.474
96.336	68.12
63.553	104.293
59.948	125.991
54.497	163.716
86.726	137.973
152.519	84.601
123.944	137.461
84.647	279.542
58.948	102.57
111.853	93.123
109.606	57.93
84.865	69.469
74.122	67.021
87.24	50.243
104.33	93.283
128.618	196.866
164.081	330.42
127.954	109.129
65.962	106.268
57.803	85.169
59.762	61.232
100.969	75.904
162.148	111.751
107.348	128.529
62.137	198.891
68.174	149.964
188.98	183.839
49.08	54.496
58.384	66.799
73.317	68.12
101.743	97.562
196.498	283.393
155.778	112.643
135.206	230.338
352.002	168.893
82.367	343.222
66.123	176.839
58.638	159.465
73.114	92.564
49.615	86.167
80.462	65.51
77.09	81.744
108.825	86.595
154.18	115.924
199.581	118.207
251.216	122.009
167.303	108.172
146.05	109.841
129.248	105.988
116.403	338.416
94.468	109.976
88.629	84.864
76.295	46.88
62.135	122.01
77.549	54.767
83.939	50.095
91.392	49.122
106.022	64.595
120.662	83.184
116.18	85.517
98.734	71.988
121.765	113.431
155.862	95.056
117.293	123.099
81.789	165.518
56.173	175.426
70.845	126.783
55.173	98.244
93.281	71.679
90.289	59.759
112.346	107.517
102.714	139.391
71.523	120.014
80.139	107.793
161.317	107.483
120.448	111.184
131.696	99.93
96.644	210.728
57.801	194.227
38.147	109.13
63.611	63.845
43.597	63.611
93.283	52.057
114.96	95.37
87.237	114.735
55.173	117.674
113.856	114.573
54.836	141.928
106.86	89.961
166.214	73.216
261.043	88.041
110.347	60.194
79.441	121.401
74.373	183.295
95.989	87.067
83.05	34.467
95.329	56.108
109.027	81.97
52.906	86.939
52.412	88.964

## Sheet: Fig 7 supp-source data 7H
WT	Dp10
90.7	112.597
102.277	83.581
92.785	114.687
135.171	155.471
75.031	167.28
267.45	191.497
129.282	140.627
115.375	158.415
99.163	130.804
120.77	143.553
70.752	119.008
93.371	131.559
124.297	96.277
129.191	109.371
192.631	126.859
129.293	126.742
134.595	125.867
141.702	101.336
133.055	109.023
131.296	129.294
117.795	125.552
109.294	138.451
99.132	157.706
88.042	152.903
111.521	178.909
118.869	134.596
124.655	136.483
130.992	125.486
133.598	130.993
129.535	122.842
161.592	130.791
142.502	129.013
148.701	122.559
123.966	139.247
85.744	140.826
86.357	183.256
76.984	124.761
94.827	141.048
108.051	129.791
129.295	80.443
97.824	113.807
100.486	112.948
277.891	127.159
87.685	137.339
88.695	144.241
160.288	159.236
112.992	211.844
98.161	164.104
112.112	107.238
130.248	94.216
130.79	79.804
147.368	87.384
156.838	110.825
145.671	131.821
123.703	101.873
106.269	88.714
139.074	98.245
160.28	123.311
153.197	126.964
173.899	124.616
162.258	154.791
161.427	157.737
141.482	145.154
180.755	142.851
206.426	135.647
218.387	104.052
178.255	121.601
162.029	160.372
140.382	123.579
118.3	184.199
175.791	127.159
92.644	131.647
98.78	96.277
172.331	105.329
119.896	93.203
143.878	141.612
191.23	134.623
186.927	118.709
223.855	95.174
204.222	86.938
141.328	89.38
152.812	182.887
163.721	105.144
159.861	126.755
156.175	147.467
138.971	137.866
193.478	129.535
139.504	148.746
142.788	177.197
117.012	182.134
105.18	162.257
131.246	202.187
139.073	175.088
135.368	143.977
102.136	138.349
84.777	129.45
85.126	140.664
111.22	176.124
131.7	140.135
155.866	132.594
159.164	149.642
139.259	127.688
157.195	122.888
121.002	137.973
136.05	87.872
137.139	80.185
127.954	107.965
128.098	99.184
125.964	104.293
150.093	147.467
214.646	164.055
145.035	145.541
136.813	134.181
146.889	123.22
146.636	154.931
175.345	127.572
137.462	159.465
142.58	104.826
150.336	79.019
134.928	143.357
102.425	139.206
167.905	136.92
140.274	162.235
119.927	144.415
112.014	170.709
118.303	199.972
204.269	151.81
134.429	122.376
120.94	92.483
116.18	100.486
147.493	166.102
143.046	196.734
170.099	198.013
110.211	184.966
138.135	181.399
133.626	208.746
163.488	173.449
152.686	156.173
158.179	114.732
151.416	107.897
160.208	106.825
170.643	121.178
195.067	123.551
162.028	131.157
150.482	123.163
162.257	142.132
142.238	179.325
160.855	149.058
284.023	147.241
184.261	169.483
175.491	143.873
117.672	159.71
210.358	171.832
117.925	172.722
103.757	156.485
142.161	157.955
179.28	165.792
102.823	176.212
154.93	197.199
141.4	183.909
177.636	155.523
197.714	115.474
174.58	150.873
155.339	154.575
163.58	152.602
204.814	185.29
186.902	165.557
148.246	159.078
218.869	126.117
237.122	155.695
218.41	147.856
196.49	156.391
154.258	137.303
153.196	119.63
128.095	132.608
101.368	118.619
137.784	134.692
145.336	127.894
